# Supplementary material for: ­Blue mussel (Mytilus spp.) cultivation in mesohaline eutrophied inner coastal waters: mitigation potential, threats and cost effectiveness
Source: PeerJ. 2021 May 20;9:e11247. doi: 10.7717/peerj.11247 (PMC8141286; doi:10.7717/peerj.11247)
Supplement: Supplemental Information 1 — Bio-chemical data of inner coastal waters and data which was used to determine clearance rates and nutrient content of cultivated Mytilus spp. Further raw data shows data which was used to determine TOC content beneath mussel farms, bio deposition rates and Vibrio bacteria concentration in mussel farms. Last but not least, the raw data is showing the economic assessment conducted for the mussel farm. [file peerj-09-11247-s001.xlsx]

## Sheet: Total nutrients, Chl a, Secchi 
Wismar Bay										Salzhaff										Warnow Estuary										Warnow Estuary										West Rügener Bodden
Station	Date	TN [µmol l-1]	Station	Date	TP [µmol l-1]	Station	Date	Chl. a [mg m-3]	Secchi depth [m]	Station	Date	TN [µmol l-1]	Station	Date	TP [µmol l-1]	Station	Date	Chl. a [mg m-3]	Secchi depth [m]	Station	Date	TN [µmol l-1]	Station	Date	TP [µmol l-1]	Station	Date	Chl. a [mg m-3]	Secchi depth [m]	Station	Date	TN [µmol l-1]	Station	Date	TP [µmol l-1]	Station	Date	Chl. a [mg m-3]	Secchi depth [m]	Station	Date	TN [µmol l-1]	Station	Date	TP [µmol l-1]	Station	Date	Chl. a [mg m-3]	Secchi depth [m]
WB3 Walfisch n.	1990-01-30 11:47:00	42.6	WB3 Walfisch n.	1990-01-30 11:47:00	1.69	WB3 Walfisch n.	1990-01-30 11:47:00	0.3	3.6	SH2 Tessmannsdorf nw.	1998-01-20 10:00:00	125	SH2 Tessmannsdorf nw.	1998-01-20 10:00:00	0.56	SH2 Tessmannsdorf nw.	1998-01-20 10:00:00	1.8	3.2	UW4 Warnowwerft	1990-01-15 09:02:00	280.9	UW4 Warnowwerft	1990-01-15 09:02:00	5.99	UW4 Warnowwerft	1990-01-15 09:02:00	1.4	1.3	DB2 Sundische Wiese	1990-01-02 09:45:00	192.7	DB2 Sundische Wiese	1990-01-02 09:45:00	1.48	DB2 Sundische Wiese	1993-02-10 10:26:00	17.8	1.2	KB90 Fahrwasser I.Libitz w.	1990-01-02 11:30:00	73.9	KB90 Fahrwasser I.Libitz w.	1990-01-02 11:30:00	2.35	KB90 Fahrwasser I.Libitz w.	1990-01-02 11:30:00	3	3
WB3 Walfisch n.	1990-01-30 11:47:00	43	WB3 Walfisch n.	1990-01-30 11:47:00	1.88	WB3 Walfisch n.	1990-02-19 12:54:00	0.9	4.2	SH2 Tessmannsdorf nw.	1998-02-12 09:30:00	140	SH2 Tessmannsdorf nw.	1998-02-12 09:30:00	0.37	SH2 Tessmannsdorf nw.	1998-02-12 09:30:00	2.2	3.2	UW4 Warnowwerft	1990-01-15 09:02:00	269.5	UW4 Warnowwerft	1990-01-15 09:02:00	7.7	UW4 Warnowwerft	1990-01-29 09:49:00	2.3	1.2	DB2 Sundische Wiese	1990-02-01 10:15:00	91.4	DB2 Sundische Wiese	1990-02-01 10:15:00	1.31	DB2 Sundische Wiese	1993-03-01 10:14:00	36.7	0.55	KB90 Fahrwasser I.Libitz w.	1990-01-02 11:30:00	83.4	KB90 Fahrwasser I.Libitz w.	1990-01-02 11:30:00	3.2	KB90 Fahrwasser I.Libitz w.	1990-02-01 12:00:00	4.1	1.3
WB3 Walfisch n.	1990-02-19 12:54:00	42.1	WB3 Walfisch n.	1990-02-19 12:54:00	2.21	WB3 Walfisch n.	1990-03-27 14:24:00	2.1	5	SH2 Tessmannsdorf nw.	1998-03-18 10:15:00	197	SH2 Tessmannsdorf nw.	1998-03-18 10:15:00	0.86	SH2 Tessmannsdorf nw.	1998-03-18 10:15:00	0.6		UW4 Warnowwerft	1990-01-29 09:49:00	162	UW4 Warnowwerft	1990-01-29 09:49:00	5.76	UW4 Warnowwerft	1990-02-12 09:32:00	2.6	1.9	DB2 Sundische Wiese	1990-03-01 10:41:00	16.9	DB2 Sundische Wiese	1990-03-01 10:41:00	1.2	DB2 Sundische Wiese	1993-03-29 09:55:00	11.6	1.6	KB90 Fahrwasser I.Libitz w.	1990-02-01 12:00:00	52.9	KB90 Fahrwasser I.Libitz w.	1990-02-01 12:00:00	3.56	KB90 Fahrwasser I.Libitz w.	1990-03-01 12:30:00	23.4	0.5
WB3 Walfisch n.	1990-02-19 12:54:00	48.8	WB3 Walfisch n.	1990-02-19 12:54:00	2.1	WB3 Walfisch n.	1990-04-17 12:40:00	3	4.5	SH2 Tessmannsdorf nw.	1998-04-15 11:20:00	113	SH2 Tessmannsdorf nw.	1998-04-15 11:20:00	0.37	SH2 Tessmannsdorf nw.	1998-04-15 11:20:00	0.4	4	UW4 Warnowwerft	1990-01-29 09:49:00	150.2	UW4 Warnowwerft	1990-01-29 09:49:00	3.26	UW4 Warnowwerft	1990-03-13 14:39:00	1.3	2	DB2 Sundische Wiese	1990-04-02 08:46:00	63.9	DB2 Sundische Wiese	1990-04-02 08:46:00	1.53	DB2 Sundische Wiese	1993-06-01 17:06:00	47.1		KB90 Fahrwasser I.Libitz w.	1990-02-01 12:00:00	57.9	KB90 Fahrwasser I.Libitz w.	1990-02-01 12:00:00	2.39	KB90 Fahrwasser I.Libitz w.	1990-04-02 10:32:00	7.6	2.7
WB3 Walfisch n.	1990-03-27 14:24:00	56.1	WB3 Walfisch n.	1990-03-27 14:24:00	2.65	WB3 Walfisch n.	1990-05-22 12:40:00	2.4	4.5	SH2 Tessmannsdorf nw.	1998-05-05 10:20:00	57.1	SH2 Tessmannsdorf nw.	1998-05-05 10:20:00	0.48	SH2 Tessmannsdorf nw.	1998-05-05 10:20:00	2.9	4.6	UW4 Warnowwerft	1990-02-12 09:32:00	139.6	UW4 Warnowwerft	1990-02-12 09:32:00	4.04	UW4 Warnowwerft	1990-04-03 12:21:00	6.7	0.7	DB2 Sundische Wiese	1990-05-07 09:10:00	68.1	DB2 Sundische Wiese	1990-05-07 09:10:00	1.39	DB2 Sundische Wiese	1993-07-26 10:53:00	29.4	0.5	KB90 Fahrwasser I.Libitz w.	1990-03-01 12:30:00	76.4	KB90 Fahrwasser I.Libitz w.	1990-03-01 12:30:00	1.04	KB90 Fahrwasser I.Libitz w.	1990-05-07 10:50:00	4.8	2.4
WB3 Walfisch n.	1990-03-27 14:24:00	53.6	WB3 Walfisch n.	1990-03-27 14:24:00	2.19	WB3 Walfisch n.	1990-07-30 12:45:00	3	2.5	SH2 Tessmannsdorf nw.	1998-06-09 11:10:00	34.4	SH2 Tessmannsdorf nw.	1998-06-09 11:10:00	1.89	SH2 Tessmannsdorf nw.	1998-06-09 11:10:00	2.1	3.2	UW4 Warnowwerft	1990-02-12 09:32:00	117.1	UW4 Warnowwerft	1990-02-12 09:32:00	6	UW4 Warnowwerft	1990-05-21 13:15:00	19.8	1.2	DB2 Sundische Wiese	1990-06-05 09:20:00	78.1	DB2 Sundische Wiese	1990-06-05 09:20:00	1.29	DB2 Sundische Wiese	1993-08-11 13:45:00	29.7	0.4	KB90 Fahrwasser I.Libitz w.	1990-03-01 12:30:00	87.7	KB90 Fahrwasser I.Libitz w.	1990-03-01 12:30:00	8.81	KB90 Fahrwasser I.Libitz w.	1990-06-05 11:15:00	6.3	3.5
WB3 Walfisch n.	1990-04-17 12:40:00	31.8	WB3 Walfisch n.	1990-04-17 12:40:00	1.14	WB3 Walfisch n.	1990-08-27 12:35:00	8.3	3.5	SH2 Tessmannsdorf nw.	1998-07-28 10:30:00	47.3	SH2 Tessmannsdorf nw.	1998-07-28 10:30:00	2.67	SH2 Tessmannsdorf nw.	1998-07-28 10:30:00	2.6	4	UW4 Warnowwerft	1990-03-13 14:39:00	230.7	UW4 Warnowwerft	1990-03-13 14:39:00	3.05	UW4 Warnowwerft	1990-06-14 10:02:00	23.5	0.5	DB2 Sundische Wiese	1990-07-02 09:10:00	57.1	DB2 Sundische Wiese	1990-07-02 09:10:00	1.65	DB2 Sundische Wiese	1993-09-09 10:12:00	21.6	0.6	KB90 Fahrwasser I.Libitz w.	1990-04-02 10:32:00	75.6	KB90 Fahrwasser I.Libitz w.	1990-04-02 10:32:00	1.66	KB90 Fahrwasser I.Libitz w.	1990-07-02 11:00:00	5.2	2.1
WB3 Walfisch n.	1990-04-17 12:40:00	31.9	WB3 Walfisch n.	1990-04-17 12:40:00	1.37	WB3 Walfisch n.	1990-09-24 11:41:00	2.1	4.8	SH2 Tessmannsdorf nw.	1998-08-01 11:00:00	45	SH2 Tessmannsdorf nw.	1998-08-01 11:00:00	2.39	SH2 Tessmannsdorf nw.	1998-08-01 11:00:00	2.2	4	UW4 Warnowwerft	1990-03-13 14:39:00	209.4	UW4 Warnowwerft	1990-03-13 14:39:00	4.76	UW4 Warnowwerft	1990-07-16 10:28:00	74.4	0.9	DB2 Sundische Wiese	1990-08-07 08:45:00	178.1	DB2 Sundische Wiese	1990-08-07 08:45:00	2.18	DB2 Sundische Wiese	1993-10-20 09:43:00	83.7	0.5	KB90 Fahrwasser I.Libitz w.	1990-04-02 10:32:00	15.6	KB90 Fahrwasser I.Libitz w.	1990-04-02 10:32:00	1.98	KB90 Fahrwasser I.Libitz w.	1990-08-07 07:23:00	8.3	2
WB3 Walfisch n.	1990-05-22 12:40:00	41.4	WB3 Walfisch n.	1990-05-22 12:40:00	3.45	WB3 Walfisch n.	1990-11-27 13:28:00	0.6	3.8	SH2 Tessmannsdorf nw.	1998-09-15 10:50:00	58.3	SH2 Tessmannsdorf nw.	1998-09-15 10:50:00	2.53	SH2 Tessmannsdorf nw.	1998-09-15 10:50:00	1.7	3.9	UW4 Warnowwerft	1990-04-03 12:21:00	225.8	UW4 Warnowwerft	1990-04-03 12:21:00	8.38	UW4 Warnowwerft	1990-08-20 12:15:00	73.6	1.6	DB2 Sundische Wiese	1990-09-04 09:39:00	87.3	DB2 Sundische Wiese	1990-09-04 09:39:00	2.38	DB2 Sundische Wiese	1993-11-18 11:30:00	65.5	0.5	KB90 Fahrwasser I.Libitz w.	1990-05-07 10:50:00	45.4	KB90 Fahrwasser I.Libitz w.	1990-05-07 10:50:00	1.13	KB90 Fahrwasser I.Libitz w.	1990-09-04 08:16:00	24.6	1
WB3 Walfisch n.	1990-05-22 12:40:00	41	WB3 Walfisch n.	1990-05-22 12:40:00	2.88	WB3 Walfisch n.	1990-12-18 12:45:00	1.3	6	SH2 Tessmannsdorf nw.	1998-10-13 12:45:00	55.9	SH2 Tessmannsdorf nw.	1998-10-13 12:45:00	0.99	SH2 Tessmannsdorf nw.	1998-10-13 12:45:00	1.5	4	UW4 Warnowwerft	1990-04-03 12:21:00	225.8	UW4 Warnowwerft	1990-04-03 12:21:00	5.06	UW4 Warnowwerft	1990-09-17 13:53:00	31	0.9	DB2 Sundische Wiese	1990-10-09 08:55:00	77.9	DB2 Sundische Wiese	1990-10-09 08:55:00	2.02	DB2 Sundische Wiese	1994-01-17 11:46:00	70.3	0.5	KB90 Fahrwasser I.Libitz w.	1990-05-07 10:50:00	45.4	KB90 Fahrwasser I.Libitz w.	1990-05-07 10:50:00	1.94	KB90 Fahrwasser I.Libitz w.	1990-10-09 11:53:00	5.8	1.5
WB3 Walfisch n.	1990-07-30 12:45:00	31.5	WB3 Walfisch n.	1990-07-30 12:45:00	2.84	WB3 Walfisch n.	1991-01-22 14:15:00	0.4	8.5	SH2 Tessmannsdorf nw.	1998-11-03 11:05:00	43	SH2 Tessmannsdorf nw.	1998-11-03 11:05:00	0.67	SH2 Tessmannsdorf nw.	1998-11-03 11:05:00	1.8	3.8	UW4 Warnowwerft	1990-05-21 13:15:00	163.6	UW4 Warnowwerft	1990-05-21 13:15:00	7.75	UW4 Warnowwerft	1990-10-22 13:28:00	9.9	1.5	DB2 Sundische Wiese	1990-11-01 09:40:00	76.8	DB2 Sundische Wiese	1990-11-01 09:40:00	1.75	DB2 Sundische Wiese	1994-04-12 10:34:00	46.9	0.48	KB90 Fahrwasser I.Libitz w.	1990-06-05 11:15:00	48.1	KB90 Fahrwasser I.Libitz w.	1990-06-05 11:15:00	1.53	KB90 Fahrwasser I.Libitz w.	1990-11-01 11:30:00	3.4	3
WB3 Walfisch n.	1990-07-30 12:45:00	27	WB3 Walfisch n.	1990-07-30 12:45:00	1.98	WB3 Walfisch n.	1991-02-28 14:00:00	1.5	3.5	SH2 Tessmannsdorf nw.	1999-01-20 10:35:00	232	SH2 Tessmannsdorf nw.	1999-01-20 10:35:00	5.31	SH2 Tessmannsdorf nw.	1999-01-20 10:35:00	2.9	4.1	UW4 Warnowwerft	1990-05-21 13:15:00	127.4	UW4 Warnowwerft	1990-05-21 13:15:00	12.3	UW4 Warnowwerft	1990-11-26 09:23:00	6.7	0.7	DB2 Sundische Wiese	1990-12-03 09:30:00	79.9	DB2 Sundische Wiese	1990-12-03 09:30:00	1.41	DB2 Sundische Wiese	1994-05-24 11:40:00	109	0.5	KB90 Fahrwasser I.Libitz w.	1990-06-05 11:15:00	57.3	KB90 Fahrwasser I.Libitz w.	1990-06-05 11:15:00	2.34	KB90 Fahrwasser I.Libitz w.	1990-12-03	1.6	3
WB3 Walfisch n.	1990-08-27 12:35:00	34.8	WB3 Walfisch n.	1990-08-27 12:35:00	2.49	WB3 Walfisch n.	1991-03-12 14:15:00	26.8	3	SH2 Tessmannsdorf nw.	1999-02-23 10:00:00	517	SH2 Tessmannsdorf nw.	1999-02-23 10:00:00	3	SH2 Tessmannsdorf nw.	1999-02-23 10:00:00	2.7	2.25	UW4 Warnowwerft	1990-06-14 10:02:00	139.1	UW4 Warnowwerft	1990-06-14 10:02:00	15.88	UW4 Warnowwerft	1990-12-17 09:46:00	3.5	1.8	DB2 Sundische Wiese	1994-01-17 11:46:00	263.7	DB2 Sundische Wiese	1994-01-17 11:46:00	4.97	DB2 Sundische Wiese	1994-08-01 11:02:00	37.5	0.4	KB90 Fahrwasser I.Libitz w.	1990-07-02 11:00:00	54.4	KB90 Fahrwasser I.Libitz w.	1990-07-02 11:00:00	2.92	KB90 Fahrwasser I.Libitz w.	1991-01-03 12:12:00	15.2	2
WB3 Walfisch n.	1990-08-27 12:35:00	38.8	WB3 Walfisch n.	1990-08-27 12:35:00	2.26	WB3 Walfisch n.	1991-05-13 14:28:00	4	4.5	SH2 Tessmannsdorf nw.	1999-03-22 10:00:00	139	SH2 Tessmannsdorf nw.	1999-03-22 10:00:00	0.57	SH2 Tessmannsdorf nw.	1999-03-22 10:00:00	4.7	3.1	UW4 Warnowwerft	1990-06-14 10:02:00	139.9	UW4 Warnowwerft	1990-06-14 10:02:00	14.86	UW4 Warnowwerft	1991-01-21 14:35:00	1.1	4.8	DB2 Sundische Wiese	1994-04-12 10:34:00	137.4	DB2 Sundische Wiese	1994-04-12 10:34:00	2.05	DB2 Sundische Wiese	1994-09-13 09:54:00	39	0.5	KB90 Fahrwasser I.Libitz w.	1990-07-02 11:00:00	57.7	KB90 Fahrwasser I.Libitz w.	1990-07-02 11:00:00	3.36	KB90 Fahrwasser I.Libitz w.	1991-03-21 11:35:00	25.9	2.8
WB3 Walfisch n.	1990-09-24 11:41:00	50.6	WB3 Walfisch n.	1990-09-24 11:41:00	2.35	WB3 Walfisch n.	1991-06-11 15:43:00	2.4	4.5	SH2 Tessmannsdorf nw.	1999-04-20 08:45:00	58.6	SH2 Tessmannsdorf nw.	1999-04-20 08:45:00	1.45	SH2 Tessmannsdorf nw.	1999-04-20 08:45:00	1.3	3.85	UW4 Warnowwerft	1990-07-16 10:28:00	129.5	UW4 Warnowwerft	1990-07-16 10:28:00	9.3	UW4 Warnowwerft	1991-02-27 13:27:00	4.4	0.8	DB2 Sundische Wiese	1994-05-24 11:40:00	116.7	DB2 Sundische Wiese	1994-05-24 11:40:00	8.08	DB2 Sundische Wiese	1994-10-26 09:55:00	29.1	0.5	KB90 Fahrwasser I.Libitz w.	1990-08-07 07:23:00	55.5	KB90 Fahrwasser I.Libitz w.	1990-08-07 07:23:00	2.7	KB90 Fahrwasser I.Libitz w.	1991-04-08 11:20:00	10.2	2.5
WB3 Walfisch n.	1990-09-24 11:41:00	46.7	WB3 Walfisch n.	1990-09-24 11:41:00	1.79	WB3 Walfisch n.	1991-07-09 14:35:00	5.6	3	SH2 Tessmannsdorf nw.	1999-05-05 08:55:00	61.5	SH2 Tessmannsdorf nw.	1999-05-05 08:55:00	1.14	SH2 Tessmannsdorf nw.	1999-05-05 08:55:00	16.3	9.9	UW4 Warnowwerft	1990-07-16 10:28:00	67.4	UW4 Warnowwerft	1990-07-16 10:28:00	5.75	UW4 Warnowwerft	1991-03-11 14:40:00	4.1	1.7	DB2 Sundische Wiese	1994-08-01 11:02:00	94.3	DB2 Sundische Wiese	1994-08-01 11:02:00	3.07	DB2 Sundische Wiese	1994-11-24 11:30:00	66	0.5	KB90 Fahrwasser I.Libitz w.	1990-08-07 07:23:00	109.4	KB90 Fahrwasser I.Libitz w.	1990-08-07 07:23:00	1.86	KB90 Fahrwasser I.Libitz w.	1991-05-21 12:00:00	16.3	2
WB3 Walfisch n.	1990-11-27 13:28:00	48.1	WB3 Walfisch n.	1990-11-27 13:28:00	2.43	WB3 Walfisch n.	1991-08-08 14:20:00	5.7	3	SH2 Tessmannsdorf nw.	1999-06-15 10:20:00	41.9	SH2 Tessmannsdorf nw.	1999-06-15 10:20:00	3.46	SH2 Tessmannsdorf nw.	1999-06-15 10:20:00	2.3	4.2	UW4 Warnowwerft	1990-08-20 12:15:00	67.4	UW4 Warnowwerft	1990-08-20 12:15:00	6.27	UW4 Warnowwerft	1991-04-15 13:30:00	10.7	1.3	DB2 Sundische Wiese	1994-09-13 09:54:00	54.5	DB2 Sundische Wiese	1994-09-13 09:54:00	1.71	DB2 Sundische Wiese	1995-01-03 10:08:00	3.5	1.32	KB90 Fahrwasser I.Libitz w.	1990-09-04 08:16:00	59.4	KB90 Fahrwasser I.Libitz w.	1990-09-04 08:16:00	2.53	KB90 Fahrwasser I.Libitz w.	1991-06-05 11:45:00	2.7	3.2
WB3 Walfisch n.	1990-11-27 13:28:00	44.2	WB3 Walfisch n.	1990-11-27 13:28:00	2.34	WB3 Walfisch n.	1991-09-25 15:10:00	2.7	6.5	SH2 Tessmannsdorf nw.	1999-07-06 09:00:00	163	SH2 Tessmannsdorf nw.	1999-07-06 09:00:00	12.1	SH2 Tessmannsdorf nw.	1999-07-06 09:00:00	18	3	UW4 Warnowwerft	1990-08-20 12:15:00	62.1	UW4 Warnowwerft	1990-08-20 12:15:00	7.06	UW4 Warnowwerft	1991-05-14 16:05:00	19.6	2	DB2 Sundische Wiese	1994-10-26 09:55:00	48.7	DB2 Sundische Wiese	1994-10-26 09:55:00	1.57	DB2 Sundische Wiese	1995-02-02 09:59:00	83.5	0.4	KB90 Fahrwasser I.Libitz w.	1990-09-04 08:16:00	71.6	KB90 Fahrwasser I.Libitz w.	1990-09-04 08:16:00	4.01	KB90 Fahrwasser I.Libitz w.	1991-07-03 12:00:00	13.1	1.1
WB3 Walfisch n.	1990-12-18 12:45:00	61.2	WB3 Walfisch n.	1990-12-18 12:45:00	2.55	WB3 Walfisch n.	1991-10-23 14:12:00	1.1	5	SH2 Tessmannsdorf nw.	1999-12-15 11:35:00	35	SH2 Tessmannsdorf nw.	1999-12-15 11:35:00	0.59	SH2 Tessmannsdorf nw.	1999-12-15 11:35:00	1.1	1.5	UW4 Warnowwerft	1990-09-17 13:53:00	117.9	UW4 Warnowwerft	1990-09-17 13:53:00	6.59	UW4 Warnowwerft	1991-06-10 13:27:00	13.9	1.4	DB2 Sundische Wiese	1994-11-24 11:30:00	106.2	DB2 Sundische Wiese	1994-11-24 11:30:00	3.29	DB2 Sundische Wiese	1995-03-02 09:49:00	106	0.45	KB90 Fahrwasser I.Libitz w.	1990-10-09 11:53:00	46.2	KB90 Fahrwasser I.Libitz w.	1990-10-09 11:53:00	1.62	KB90 Fahrwasser I.Libitz w.	1991-10-14 09:05:00	3.9	2.8
WB3 Walfisch n.	1990-12-18 12:45:00	60.5	WB3 Walfisch n.	1990-12-18 12:45:00	2.5	WB3 Walfisch n.	1991-12-12 16:34:00	1.1		SH2 Tessmannsdorf nw.	2000-01-20 09:55:00	127	SH2 Tessmannsdorf nw.	2000-01-20 09:55:00	0.81	SH2 Tessmannsdorf nw.	2000-01-20 09:55:00	1.9	4.6	UW4 Warnowwerft	1990-09-17 13:53:00	90.2	UW4 Warnowwerft	1990-09-17 13:53:00	8.9	UW4 Warnowwerft	1991-07-08 13:36:00	252.9	0.6	DB2 Sundische Wiese	1995-01-03 10:08:00	24	DB2 Sundische Wiese	1995-01-03 10:08:00	0.5	DB2 Sundische Wiese	1995-05-11 09:48:00	36	0.68	KB90 Fahrwasser I.Libitz w.	1990-10-09 11:53:00	46.8	KB90 Fahrwasser I.Libitz w.	1990-10-09 11:53:00	2.21	KB90 Fahrwasser I.Libitz w.	1992-01-21 13:15:00	5.8	1.7
WB3 Walfisch n.	1991-01-22 14:15:00	69.1	WB3 Walfisch n.	1991-01-22 14:15:00	2.1	WB3 Walfisch n.	1992-02-11 12:20:00	1	6.1	SH2 Tessmannsdorf nw.	2000-02-15 11:50:00	117	SH2 Tessmannsdorf nw.	2000-02-15 11:50:00	1.78	SH2 Tessmannsdorf nw.	2000-02-15 11:50:00	1.8	5	UW4 Warnowwerft	1990-10-22 13:28:00	114.8	UW4 Warnowwerft	1990-10-22 13:28:00	6.19	UW4 Warnowwerft	1991-08-07 14:00:00	24.7	1.5	DB2 Sundische Wiese	1995-02-02 09:59:00	211	DB2 Sundische Wiese	1995-02-02 09:59:00	3.53	DB2 Sundische Wiese	1995-06-29 10:04:00	33.9	0.42	KB90 Fahrwasser I.Libitz w.	1990-11-01 11:30:00	38.8	KB90 Fahrwasser I.Libitz w.	1990-11-01 11:30:00	1.7	KB90 Fahrwasser I.Libitz w.	1992-02-13 08:42:00	2.6	2.5
WB3 Walfisch n.	1991-01-22 14:15:00	67.7	WB3 Walfisch n.	1991-01-22 14:15:00	1.95	WB3 Walfisch n.	1992-05-12 11:55:00	0.4	5	SH2 Tessmannsdorf nw.	2000-03-21 11:55:00	107	SH2 Tessmannsdorf nw.	2000-03-21 11:55:00	0.88	SH2 Tessmannsdorf nw.	2000-03-21 11:55:00	15	2	UW4 Warnowwerft	1990-10-22 13:28:00	98.4	UW4 Warnowwerft	1990-10-22 13:28:00	3.77	UW4 Warnowwerft	1991-09-04 14:11:00	24.7	2.8	DB2 Sundische Wiese	1995-03-02 09:49:00	169	DB2 Sundische Wiese	1995-03-02 09:49:00	2.6	DB2 Sundische Wiese	1995-07-31 09:44:00	17.7	0.64	KB90 Fahrwasser I.Libitz w.	1990-11-01 11:30:00	39.4	KB90 Fahrwasser I.Libitz w.	1990-11-01 11:30:00	1.95	KB90 Fahrwasser I.Libitz w.	1992-03-11 08:57:00	5.6	1.7
WB3 Walfisch n.	1991-02-28 14:00:00	53.2	WB3 Walfisch n.	1991-02-28 14:00:00	1.6	WB3 Walfisch n.	1992-06-11 13:44:00	1.7	3.8	SH2 Tessmannsdorf nw.	2000-04-12 09:30:00	71.2	SH2 Tessmannsdorf nw.	2000-04-12 09:30:00	0.68	SH2 Tessmannsdorf nw.	2000-04-12 09:30:00	2.3	3	UW4 Warnowwerft	1990-11-26 09:23:00	120	UW4 Warnowwerft	1990-11-26 09:23:00	3.92	UW4 Warnowwerft	1991-10-15 15:02:00	4.6	4.5	DB2 Sundische Wiese	1995-05-11 09:48:00	49.4	DB2 Sundische Wiese	1995-05-11 09:48:00	1.33	DB2 Sundische Wiese	1995-08-14 10:15:00	20.2	0.49	KB90 Fahrwasser I.Libitz w.	1990-12-03	47.1	KB90 Fahrwasser I.Libitz w.	1990-12-03	2.11	KB90 Fahrwasser I.Libitz w.	1992-04-28 08:10:00	16.2	1.4
WB3 Walfisch n.	1991-02-28 14:00:00	54.8	WB3 Walfisch n.	1991-02-28 14:00:00	1.94	WB3 Walfisch n.	1992-07-21 14:31:00	3.5	2.8	SH2 Tessmannsdorf nw.	2000-05-02 11:55:00	42.4	SH2 Tessmannsdorf nw.	2000-05-02 11:55:00	0.35	SH2 Tessmannsdorf nw.	2000-05-02 11:55:00	3.7	2.5	UW4 Warnowwerft	1990-11-26 09:23:00	91.1	UW4 Warnowwerft	1990-11-26 09:23:00	5.29	UW4 Warnowwerft	1991-11-14 13:16:00	1.7	1.5	DB2 Sundische Wiese	1995-06-29 10:04:00	52.3	DB2 Sundische Wiese	1995-06-29 10:04:00	2.11	DB2 Sundische Wiese	1995-09-18 10:10:00	24.1	0.75	KB90 Fahrwasser I.Libitz w.	1990-12-03	54.2	KB90 Fahrwasser I.Libitz w.	1990-12-03	1.28	KB90 Fahrwasser I.Libitz w.	1992-05-14 11:25:00	11.8	1.4
WB3 Walfisch n.	1991-03-12 14:15:00	39.7	WB3 Walfisch n.	1991-03-12 14:15:00	3.42	WB3 Walfisch n.	1992-09-21 12:36:00	3.1	4.2	SH2 Tessmannsdorf nw.	2000-06-15 09:15:00	25.1	SH2 Tessmannsdorf nw.	2000-06-15 09:15:00	1.31	SH2 Tessmannsdorf nw.	2000-06-15 09:15:00	1.6	4.8	UW4 Warnowwerft	1990-12-17 09:46:00	231.1	UW4 Warnowwerft	1990-12-17 09:46:00	5.9	UW4 Warnowwerft	1991-12-11 09:41:00	2.9	2.4	DB2 Sundische Wiese	1995-07-31 09:44:00	50.1	DB2 Sundische Wiese	1995-07-31 09:44:00	1.51	DB2 Sundische Wiese	1995-10-26 10:00:00	50.4	0.6	KB90 Fahrwasser I.Libitz w.	1994-01-06 08:24:00	62.2	KB90 Fahrwasser I.Libitz w.	1994-01-06 08:24:00	2.01	KB90 Fahrwasser I.Libitz w.	1992-06-23 07:56:00	3.9	1.4
WB3 Walfisch n.	1991-03-12 14:15:00	30.3	WB3 Walfisch n.	1991-03-12 14:15:00	0.55	WB3 Walfisch n.	1992-10-19 14:30:00	1.9	5.2	SH2 Tessmannsdorf nw.	2000-07-25 07:55:00	20.8	SH2 Tessmannsdorf nw.	2000-07-25 07:55:00	0.79	SH2 Tessmannsdorf nw.	2000-07-25 07:55:00	1.2	4	UW4 Warnowwerft	1991-01-21 14:35:00	48.5	UW4 Warnowwerft	1990-12-17 09:46:00	5.44	UW4 Warnowwerft	1992-01-13 15:02:00	0.8	3.5	DB2 Sundische Wiese	1995-08-14 10:15:00	55.4	DB2 Sundische Wiese	1995-08-14 10:15:00	1.9	DB2 Sundische Wiese	1995-11-01 11:36:00	30.4	0.75	KB90 Fahrwasser I.Libitz w.	1994-02-03 08:42:00	86.6	KB90 Fahrwasser I.Libitz w.	1994-02-03 08:42:00	2.55	KB90 Fahrwasser I.Libitz w.	1992-07-16 07:55:00	10.4	1.5
WB3 Walfisch n.	1991-05-13 14:28:00	26.1	WB3 Walfisch n.	1991-05-13 14:28:00	1.55	WB3 Walfisch n.	1992-11-10 14:01:00	0.9	6.1	SH2 Tessmannsdorf nw.	2000-08-22 09:10:00	33.2	SH2 Tessmannsdorf nw.	2000-08-22 09:10:00	2.36	SH2 Tessmannsdorf nw.	2000-08-22 09:10:00	1.9	3	UW4 Warnowwerft	1991-01-21 14:35:00	41	UW4 Warnowwerft	1991-01-21 14:35:00	1.4	UW4 Warnowwerft	1992-02-10 13:49:00	2.7	2.3	DB2 Sundische Wiese	1995-09-18 10:10:00	49.5	DB2 Sundische Wiese	1995-09-18 10:10:00	3.44	DB2 Sundische Wiese	1996-04-18 09:45:00	33.9	0.62	KB90 Fahrwasser I.Libitz w.	1994-03-28 08:36:00	100.5	KB90 Fahrwasser I.Libitz w.	1994-03-28 08:36:00	1.89	KB90 Fahrwasser I.Libitz w.	1992-08-31 10:20:00	25	1.7
WB3 Walfisch n.	1991-05-13 14:28:00	23	WB3 Walfisch n.	1991-05-13 14:28:00	1.58	WB3 Walfisch n.	1992-12-02 11:35:00	0.4	4	SH2 Tessmannsdorf nw.	2000-09-26 12:45:00	39.8	SH2 Tessmannsdorf nw.	2000-09-26 12:45:00	0.64	SH2 Tessmannsdorf nw.	2000-09-26 12:45:00	2.3	5.5	UW4 Warnowwerft	1991-02-27 13:27:00	323.4	UW4 Warnowwerft	1991-01-21 14:35:00	1.77	UW4 Warnowwerft	1992-03-09 14:04:00	2.7	2.2	DB2 Sundische Wiese	1995-10-26 10:00:00	50.4	DB2 Sundische Wiese	1995-10-26 10:00:00	1.74	DB2 Sundische Wiese	1996-05-02 10:22:00	37.2	0.6	KB90 Fahrwasser I.Libitz w.	1994-04-12 08:55:00	98.2	KB90 Fahrwasser I.Libitz w.	1994-04-12 08:55:00	1.95	KB90 Fahrwasser I.Libitz w.	1992-09-14 09:23:00	14.5	1.9
WB3 Walfisch n.	1991-06-11 15:43:00	52.7	WB3 Walfisch n.	1991-06-11 15:43:00	2.48	WB3 Walfisch n.	1993-02-16 12:26:00	0.1	8.5	SH2 Tessmannsdorf nw.	2000-10-23 12:00:00	35	SH2 Tessmannsdorf nw.	2000-10-23 12:00:00	1.15	SH2 Tessmannsdorf nw.	2000-10-23 12:00:00	1.5	3.9	UW4 Warnowwerft	1991-02-27 13:27:00	390	UW4 Warnowwerft	1991-02-27 13:27:00	8.23	UW4 Warnowwerft	1992-04-13 12:05:00	20.7	4	DB2 Sundische Wiese	1995-11-01 11:36:00	40.1	DB2 Sundische Wiese	1995-11-01 11:36:00	1.27	DB2 Sundische Wiese	1996-06-27 09:58:00	25.5	0.7	KB90 Fahrwasser I.Libitz w.	1994-06-01 11:16:00	44.2	KB90 Fahrwasser I.Libitz w.	1994-06-01 11:16:00	1.4	KB90 Fahrwasser I.Libitz w.	1992-11-04 08:35:00	9.6	1.5
WB3 Walfisch n.	1991-06-11 15:43:00	52.6	WB3 Walfisch n.	1991-06-11 15:43:00	3.14	WB3 Walfisch n.	1993-03-16 12:55:00	9.1	4.5	SH2 Tessmannsdorf nw.	2000-11-14 07:55:00	26.3	SH2 Tessmannsdorf nw.	2000-11-14 07:55:00	0.33	SH2 Tessmannsdorf nw.	2000-11-14 07:55:00	4.2	4.8	UW4 Warnowwerft	1991-03-11 14:40:00	238.8	UW4 Warnowwerft	1991-02-27 13:27:00	4.23	UW4 Warnowwerft	1992-05-11 13:50:00	10.2	2.5	DB2 Sundische Wiese	1996-04-18 09:45:00	99.5	DB2 Sundische Wiese	1996-04-18 09:45:00	2.49	DB2 Sundische Wiese	1996-07-04 09:53:00	35.9	0.4	KB90 Fahrwasser I.Libitz w.	1994-08-01 09:28:00	61.9	KB90 Fahrwasser I.Libitz w.	1994-08-01 09:28:00	6.02	KB90 Fahrwasser I.Libitz w.	1993-02-10 09:07:00	4	1.8
WB3 Walfisch n.	1991-07-09 14:35:00	25.5	WB3 Walfisch n.	1991-07-09 14:35:00	1.3	WB3 Walfisch n.	1993-05-25 13:37:00	2.6	5.5	SH2 Tessmannsdorf nw.	2000-12-12 15:20:00	23.8	SH2 Tessmannsdorf nw.	2000-12-12 15:20:00	0.81	SH2 Tessmannsdorf nw.	2000-12-12 15:20:00	1.5	4.2	UW4 Warnowwerft	1991-03-11 14:40:00	238.8	UW4 Warnowwerft	1991-03-11 14:40:00	2.86	UW4 Warnowwerft	1992-06-09 14:35:00	18.6	3.5	DB2 Sundische Wiese	1996-05-02 10:22:00	58.2	DB2 Sundische Wiese	1996-05-02 10:22:00	1.66	DB2 Sundische Wiese	1996-08-01 10:31:00	25.4	0.7	KB90 Fahrwasser I.Libitz w.	1994-09-13 08:25:00	43.2	KB90 Fahrwasser I.Libitz w.	1994-09-13 08:25:00	4.71	KB90 Fahrwasser I.Libitz w.	1993-03-01 08:57:00	4.1	2.1
WB3 Walfisch n.	1991-07-09 14:35:00	25.5	WB3 Walfisch n.	1991-07-09 14:35:00	2	WB3 Walfisch n.	1993-07-20 12:43:00	5.7	3.5	SH2 Tessmannsdorf nw.	2001-01-08 09:20:00	66.8	SH2 Tessmannsdorf nw.	2001-01-08 09:20:00	1.26	SH2 Tessmannsdorf nw.	2001-01-08 09:20:00	3.2	4.1	UW4 Warnowwerft	1991-04-15 13:30:00	142.4	UW4 Warnowwerft	1991-03-11 14:40:00	1.77	UW4 Warnowwerft	1992-07-13 13:46:00	14.4	1.9	DB2 Sundische Wiese	1996-06-27 09:58:00	58.4	DB2 Sundische Wiese	1996-06-27 09:58:00	2.25	DB2 Sundische Wiese	1996-09-05 10:21:00	36.9	0.6	KB90 Fahrwasser I.Libitz w.	1994-10-25 13:44:00	38.2	KB90 Fahrwasser I.Libitz w.	1994-10-25 13:44:00	2.31	KB90 Fahrwasser I.Libitz w.	1993-03-29 08:23:00	12.7	1.5
WB3 Walfisch n.	1991-08-08 14:20:00	20.5	WB3 Walfisch n.	1991-08-08 14:20:00	2.07	WB3 Walfisch n.	1993-08-10 16:52:00	2.3	3.2	SH2 Tessmannsdorf nw.	2001-02-19 09:30:00	115	SH2 Tessmannsdorf nw.	2001-02-19 09:30:00	1.3	SH2 Tessmannsdorf nw.	2001-02-19 09:30:00	3.9	4.9	UW4 Warnowwerft	1991-04-15 13:30:00	142.3	UW4 Warnowwerft	1991-04-15 13:30:00	3.71	UW4 Warnowwerft	1992-08-26 14:00:00	21.9	1.4	DB2 Sundische Wiese	1996-07-04 09:53:00	68.7	DB2 Sundische Wiese	1996-07-04 09:53:00	3.42	DB2 Sundische Wiese	1996-10-01 10:02:00	46.2	0.45	KB90 Fahrwasser I.Libitz w.	1994-11-23 13:35:00	25.8	KB90 Fahrwasser I.Libitz w.	1994-11-23 13:35:00	0.94	KB90 Fahrwasser I.Libitz w.	1993-06-01 18:25:00	11.9
WB3 Walfisch n.	1991-08-08 14:20:00	25.5	WB3 Walfisch n.	1991-08-08 14:20:00	1.68	WB3 Walfisch n.	1993-09-15 15:50:00	4.6	5	SH2 Tessmannsdorf nw.	2001-03-05 09:15:00	88.8	SH2 Tessmannsdorf nw.	2001-03-05 09:15:00	1.06	SH2 Tessmannsdorf nw.	2001-03-05 09:15:00	2.5	4.7	UW4 Warnowwerft	1991-05-14 16:05:00	47.6	UW4 Warnowwerft	1991-04-15 13:30:00	3.62	UW4 Warnowwerft	1992-09-07 13:32:00	24	1.6	DB2 Sundische Wiese	1996-08-01 10:31:00	56.9	DB2 Sundische Wiese	1996-08-01 10:31:00	2.33	DB2 Sundische Wiese	1996-11-21 10:43:00	34.6	0.8	KB90 Fahrwasser I.Libitz w.	1994-12-19 09:50:00	40.6	KB90 Fahrwasser I.Libitz w.	1994-12-19 09:50:00	0.82	KB90 Fahrwasser I.Libitz w.	1993-07-26 09:22:00	6.6	2.4
WB3 Walfisch n.	1991-09-25 15:10:00	34.7	WB3 Walfisch n.	1991-09-25 15:10:00	1.7	WB3 Walfisch n.	1993-10-11 17:00:00	11.2	3.5	SH2 Tessmannsdorf nw.	2001-04-18 10:52:00	73.9	SH2 Tessmannsdorf nw.	2001-04-18 10:52:00	0.5	SH2 Tessmannsdorf nw.	2001-04-18 10:52:00	2.4	5.1	UW4 Warnowwerft	1991-05-14 16:05:00	71.9	UW4 Warnowwerft	1991-05-14 16:05:00	1.11	UW4 Warnowwerft	1992-10-07 15:02:00	13.4	2.6	DB2 Sundische Wiese	1996-09-05 10:21:00	55.5	DB2 Sundische Wiese	1996-09-05 10:21:00	3.54	DB2 Sundische Wiese	1996-12-05 09:46:00	54.4	0.6	KB90 Fahrwasser I.Libitz w.	1995-01-31 08:17:00	55.3	KB90 Fahrwasser I.Libitz w.	1995-01-31 08:17:00	0.68	KB90 Fahrwasser I.Libitz w.	1993-08-18 10:26:00	3.3	2.2
WB3 Walfisch n.	1991-09-25 15:10:00	28.4	WB3 Walfisch n.	1991-09-25 15:10:00	1.48	WB3 Walfisch n.	1994-01-04 12:22:00	0.8	5.2	SH2 Tessmannsdorf nw.	2001-05-14 10:30:00	43.8	SH2 Tessmannsdorf nw.	2001-05-14 10:30:00	0.64	SH2 Tessmannsdorf nw.	2001-05-14 10:30:00	3.7	4	UW4 Warnowwerft	1991-06-10 13:27:00	82.3	UW4 Warnowwerft	1991-05-14 16:05:00	1.49	UW4 Warnowwerft	1992-11-09 13:10:00	5.9	3.3	DB2 Sundische Wiese	1996-10-01 10:02:00	66.5	DB2 Sundische Wiese	1996-10-01 10:02:00	3.36	DB2 Sundische Wiese	1997-03-06 09:31:00	48.5	0.6	KB90 Fahrwasser I.Libitz w.	1995-02-27 09:15:00	78	KB90 Fahrwasser I.Libitz w.	1995-02-27 09:15:00	1.18	KB90 Fahrwasser I.Libitz w.	1993-09-09 08:47:00	3	2.4
WB3 Walfisch n.	1991-10-23 14:12:00	28.4	WB3 Walfisch n.	1991-10-23 14:12:00	1.47	WB3 Walfisch n.	1994-02-08 13:15:00	0.7	6.9	SH2 Tessmannsdorf nw.	2001-06-25 10:40:00	30.7	SH2 Tessmannsdorf nw.	2001-06-25 10:40:00	1.62	SH2 Tessmannsdorf nw.	2001-06-25 10:40:00	2	4.7	UW4 Warnowwerft	1991-06-10 13:27:00	114.5	UW4 Warnowwerft	1991-06-10 13:27:00	6.62	UW4 Warnowwerft	1992-12-01 12:48:00	2	2.7	DB2 Sundische Wiese	1996-11-21 10:43:00	60.9	DB2 Sundische Wiese	1996-11-21 10:43:00	2.17	DB2 Sundische Wiese	1997-04-16 10:08:00	14.6	1	KB90 Fahrwasser I.Libitz w.	1995-03-02 08:21:00	95.2	KB90 Fahrwasser I.Libitz w.	1995-03-02 08:21:00	1.05	KB90 Fahrwasser I.Libitz w.	1993-10-20 08:13:00	6.2	2.7
WB3 Walfisch n.	1991-10-23 14:12:00	23.2	WB3 Walfisch n.	1991-10-23 14:12:00	0.97	WB3 Walfisch n.	1994-03-22 11:45:00	0.8	2.2	SH2 Tessmannsdorf nw.	2001-07-09 13:00:00	44.7	SH2 Tessmannsdorf nw.	2001-07-09 13:00:00	3.91	SH2 Tessmannsdorf nw.	2001-07-09 13:00:00	4	4.7	UW4 Warnowwerft	1991-07-08 13:36:00	64.5	UW4 Warnowwerft	1991-06-10 13:27:00	3.74	UW4 Warnowwerft	1993-02-15 13:33:00	3.5	2	DB2 Sundische Wiese	1996-12-05 09:46:00	107	DB2 Sundische Wiese	1996-12-05 09:46:00	3.56	DB2 Sundische Wiese	1997-05-29 10:03:00	44.8	0.4	KB90 Fahrwasser I.Libitz w.	1995-04-24 08:30:00	30.2	KB90 Fahrwasser I.Libitz w.	1995-04-24 08:30:00	0.46	KB90 Fahrwasser I.Libitz w.	1993-11-18 12:52:00	8.9	1.75
WB3 Walfisch n.	1991-12-12 16:34:00	28.4	WB3 Walfisch n.	1991-12-12 16:34:00	1.52	WB3 Walfisch n.	1994-04-21 10:08:00	2.2	3.8	SH2 Tessmannsdorf nw.	2001-08-13 11:55:00	42.5	SH2 Tessmannsdorf nw.	2001-08-13 11:55:00	3.54	SH2 Tessmannsdorf nw.	2001-08-13 11:55:00	3.1	4.8	UW4 Warnowwerft	1991-07-08 13:36:00	64.5	UW4 Warnowwerft	1991-07-08 13:36:00	1.24	UW4 Warnowwerft	1993-03-15 17:07:00	2.6	1.8	DB2 Sundische Wiese	1997-03-06 09:31:00	113	DB2 Sundische Wiese	1997-03-06 09:31:00	1.94	DB2 Sundische Wiese	1997-06-12 10:01:00	23.7	0.5	KB90 Fahrwasser I.Libitz w.	1995-05-11 08:29:00	28.2	KB90 Fahrwasser I.Libitz w.	1995-05-11 08:29:00	0.51	KB90 Fahrwasser I.Libitz w.	1994-01-06 08:24:00	3.1	1.6
WB3 Walfisch n.	1991-12-12 16:34:00	17.3	WB3 Walfisch n.	1991-12-12 16:34:00	1.2	WB3 Walfisch n.	1994-07-26 12:05:00	5.7	2.1	SH2 Tessmannsdorf nw.	2001-09-17 09:35:00	37.7	SH2 Tessmannsdorf nw.	2001-09-17 09:35:00	1.16	SH2 Tessmannsdorf nw.	2001-09-17 09:35:00	1.6	4.9	UW4 Warnowwerft	1991-08-07 14:00:00	32.7	UW4 Warnowwerft	1991-07-08 13:36:00	8.69	UW4 Warnowwerft	1993-05-24 10:33:00	3.3	3.4	DB2 Sundische Wiese	1997-04-16 10:08:00	48.8	DB2 Sundische Wiese	1997-04-16 10:08:00	1.19	DB2 Sundische Wiese	1997-09-08 09:56:00	66.6	0.3	KB90 Fahrwasser I.Libitz w.	1995-06-29 08:33:00	30.1	KB90 Fahrwasser I.Libitz w.	1995-06-29 08:33:00	3.22	KB90 Fahrwasser I.Libitz w.	1994-02-03 08:42:00	11.3	0.8
WB3 Walfisch n.	1992-02-11 12:20:00	33.3	WB3 Walfisch n.	1992-02-11 12:20:00	1.53	WB3 Walfisch n.	1994-08-17 14:57:00	2.9	2.7	SH2 Tessmannsdorf nw.	2001-10-08 11:15:00	49	SH2 Tessmannsdorf nw.	2001-10-08 11:15:00	0.73	SH2 Tessmannsdorf nw.	2001-10-08 11:15:00	2.5	4.9	UW4 Warnowwerft	1991-08-07 14:00:00	49.2	UW4 Warnowwerft	1991-08-07 14:00:00	2.99	UW4 Warnowwerft	1993-06-14 14:44:00	31.9	1.5	DB2 Sundische Wiese	1997-05-29 10:03:00	99.9	DB2 Sundische Wiese	1997-05-29 10:03:00	2.96	DB2 Sundische Wiese	1997-10-20 11:55:00	24.2	0.9	KB90 Fahrwasser I.Libitz w.	1995-07-18 12:43:00	36.2	KB90 Fahrwasser I.Libitz w.	1995-07-18 12:43:00	1.97	KB90 Fahrwasser I.Libitz w.	1994-03-28 08:36:00	13.6	1.75
WB3 Walfisch n.	1992-02-11 12:20:00	33.1	WB3 Walfisch n.	1992-02-11 12:20:00	1.14	WB3 Walfisch n.	1994-09-20 13:32:00	1.6	3.75	SH2 Tessmannsdorf nw.	2001-11-12 11:00:00	38.7	SH2 Tessmannsdorf nw.	2001-11-12 11:00:00	0.73	SH2 Tessmannsdorf nw.	2001-11-12 11:00:00	2.5	5.3	UW4 Warnowwerft	1991-09-04 14:11:00	57.3	UW4 Warnowwerft	1991-08-07 14:00:00	1.03	UW4 Warnowwerft	1993-07-19 13:46:00	48.4	0.8	DB2 Sundische Wiese	1997-06-12 10:01:00	102	DB2 Sundische Wiese	1997-06-12 10:01:00	3.2	DB2 Sundische Wiese	1997-11-27 10:12:00	18.6	1.5	KB90 Fahrwasser I.Libitz w.	1995-08-21 09:04:00	46.1	KB90 Fahrwasser I.Libitz w.	1995-08-21 09:04:00	3.24	KB90 Fahrwasser I.Libitz w.	1994-04-12 08:55:00	6.9	0.6
WB3 Walfisch n.	1992-03-10 13:55:00	13.4	WB3 Walfisch n.	1992-03-10 13:55:00	1.21	WB3 Walfisch n.	1994-10-18 13:03:00	2.6	4.5	SH2 Tessmannsdorf nw.	2001-12-03 10:19:00	97	SH2 Tessmannsdorf nw.	2001-12-03 10:19:00	1.99	SH2 Tessmannsdorf nw.	2001-12-03 10:19:00	1.8	5.1	UW4 Warnowwerft	1991-09-04 14:11:00	45.7	UW4 Warnowwerft	1991-09-04 14:11:00	3.38	UW4 Warnowwerft	1993-08-10 09:17:00	6.9	1.6	DB2 Sundische Wiese	1997-09-08 09:56:00	116	DB2 Sundische Wiese	1997-09-08 09:56:00	3.71	DB2 Sundische Wiese	1997-12-16 10:50:00	10.2	1.1	KB90 Fahrwasser I.Libitz w.	1995-09-07 09:39:00	27.7	KB90 Fahrwasser I.Libitz w.	1995-09-07 09:39:00	1.05	KB90 Fahrwasser I.Libitz w.	1994-06-01 11:16:00	26.9	0.75
WB3 Walfisch n.	1992-03-10 13:55:00	27.6	WB3 Walfisch n.	1992-03-10 13:55:00	0.38	WB3 Walfisch n.	1994-11-09 13:02:00	6.5	6	SH2 Tessmannsdorf nw.	2002-01-14 10:13:00	78.8	SH2 Tessmannsdorf nw.	2002-01-14 10:13:00	1.32	SH2 Tessmannsdorf nw.	2002-01-14 10:13:00	8.5	4.9	UW4 Warnowwerft	1991-10-15 15:02:00	45.4	UW4 Warnowwerft	1991-09-04 14:11:00	4.55	UW4 Warnowwerft	1993-09-16 08:54:00	6.6	2.7	DB2 Sundische Wiese	1997-10-20 11:55:00	54	DB2 Sundische Wiese	1997-10-20 11:55:00	1.56	DB2 Sundische Wiese	1998-03-03 09:48:00	49	0.6	KB90 Fahrwasser I.Libitz w.	1995-10-26 08:40:00	29.1	KB90 Fahrwasser I.Libitz w.	1995-10-26 08:40:00	1.7	KB90 Fahrwasser I.Libitz w.	1994-08-01 09:28:00	15.7	0.55
WB3 Walfisch n.	1992-05-12 11:55:00	31.5	WB3 Walfisch n.	1992-05-12 11:55:00	0.9	WB3 Walfisch n.	1995-02-14 12:42:00	1.4	6.85	SH2 Tessmannsdorf nw.	2002-02-25 12:30:00	192	SH2 Tessmannsdorf nw.	2002-02-25 12:30:00	1.18	SH2 Tessmannsdorf nw.	2002-02-25 12:30:00	4.5	1.5	UW4 Warnowwerft	1991-10-15 15:02:00	51.2	UW4 Warnowwerft	1991-10-15 15:02:00	2.98	UW4 Warnowwerft	1993-10-12 08:58:00	4	2.1	DB2 Sundische Wiese	1997-11-27 10:12:00	77.6	DB2 Sundische Wiese	1997-11-27 10:12:00	1.59	DB2 Sundische Wiese	1998-04-28 10:37:00	87.4	0.6	KB90 Fahrwasser I.Libitz w.	1995-11-01 10:25:00	33.6	KB90 Fahrwasser I.Libitz w.	1995-11-01 10:25:00	1.84	KB90 Fahrwasser I.Libitz w.	1994-10-25 13:44:00	19.7	1.2
WB3 Walfisch n.	1992-05-12 11:55:00	21.1	WB3 Walfisch n.	1992-05-12 11:55:00	0.54	WB3 Walfisch n.	1995-04-20 13:26:00	4.9	3.57	SH2 Tessmannsdorf nw.	2002-04-02 12:10:00	75	SH2 Tessmannsdorf nw.	2002-03-18 09:15:00	0.48	SH2 Tessmannsdorf nw.	2002-03-18 09:15:00	4.5	5	UW4 Warnowwerft	1991-11-14 13:16:00	66.5	UW4 Warnowwerft	1991-10-15 15:02:00	2.96	UW4 Warnowwerft	1994-01-03 14:00:00	2.4	1.45	DB2 Sundische Wiese	1997-12-16 10:50:00	55.8	DB2 Sundische Wiese	1997-12-16 10:50:00	1.83	DB2 Sundische Wiese	1998-05-04 12:02:00	92.3	0.6	KB90 Fahrwasser I.Libitz w.	1995-12-14 09:12:00	18.9	KB90 Fahrwasser I.Libitz w.	1995-12-14 09:12:00	1.81	KB90 Fahrwasser I.Libitz w.	1994-11-23 13:35:00	11.8	1.5
WB3 Walfisch n.	1992-06-11 13:44:00	30.8	WB3 Walfisch n.	1992-06-11 13:44:00	1.14	WB3 Walfisch n.	1995-05-03 13:42:00	1.5	5.87	SH2 Tessmannsdorf nw.	2002-05-06 13:25:00	91.1	SH2 Tessmannsdorf nw.	2002-04-02 12:10:00	3.93	SH2 Tessmannsdorf nw.	2002-04-02 12:10:00	2.4	4.9	UW4 Warnowwerft	1991-11-14 13:16:00	61.3	UW4 Warnowwerft	1991-11-14 13:16:00	3.88	UW4 Warnowwerft	1994-02-07 14:24:00	2.2	1.6	DB2 Sundische Wiese	1998-03-03 09:48:00	183	DB2 Sundische Wiese	1998-03-03 09:48:00	3.64	DB2 Sundische Wiese	1998-06-11 09:35:00	57.5	0.4	KB90 Fahrwasser I.Libitz w.	1996-04-17 14:02:00	64.9	KB90 Fahrwasser I.Libitz w.	1996-04-17 14:02:00	1.17	KB90 Fahrwasser I.Libitz w.	1994-12-19 09:50:00	8	1.2
WB3 Walfisch n.	1992-06-11 13:44:00	37.4	WB3 Walfisch n.	1992-06-11 13:44:00	2.03	WB3 Walfisch n.	1995-06-27 13:17:00	2.1	2.99	SH2 Tessmannsdorf nw.	2002-06-04 10:35:00	29.7	SH2 Tessmannsdorf nw.	2002-05-06 13:25:00	1.67	SH2 Tessmannsdorf nw.	2002-05-06 13:25:00	7.5	3.9	UW4 Warnowwerft	1991-12-11 09:41:00	121.7	UW4 Warnowwerft	1991-11-14 13:16:00	3.86	UW4 Warnowwerft	1994-03-21 15:22:00	1.5	0.95	DB2 Sundische Wiese	1998-04-28 10:37:00	133	DB2 Sundische Wiese	1998-04-28 10:37:00	2.15	DB2 Sundische Wiese	1998-07-30 09:46:00	16.2	0.7	KB90 Fahrwasser I.Libitz w.	1996-04-25 08:09:00	58.4	KB90 Fahrwasser I.Libitz w.	1996-04-25 08:09:00	1.26	KB90 Fahrwasser I.Libitz w.	1995-01-31 08:17:00	1	1.7
WB3 Walfisch n.	1992-07-21 14:31:00	36.1	WB3 Walfisch n.	1992-07-21 14:31:00	2.22	WB3 Walfisch n.	1995-07-06 13:09:00	3.1	3.76	SH2 Tessmannsdorf nw.	2002-07-01 08:15:00	40.8	SH2 Tessmannsdorf nw.	2002-06-04 10:35:00	1.95	SH2 Tessmannsdorf nw.	2002-06-04 10:35:00	3.1	3.6	UW4 Warnowwerft	1991-12-11 09:41:00	110.3	UW4 Warnowwerft	1991-12-11 09:41:00	3.12	UW4 Warnowwerft	1994-04-21 15:35:00	21.7	1.1	DB2 Sundische Wiese	1998-05-04 12:02:00	120	DB2 Sundische Wiese	1998-05-04 12:02:00	2.6	DB2 Sundische Wiese	1998-08-13 10:04:00	21.3	0.9	KB90 Fahrwasser I.Libitz w.	1996-05-02 12:36:00	35.3	KB90 Fahrwasser I.Libitz w.	1996-05-02 12:36:00	1.39	KB90 Fahrwasser I.Libitz w.	1995-02-27 09:15:00	6.6	1.8
WB3 Walfisch n.	1992-07-21 14:31:00	40.3	WB3 Walfisch n.	1992-07-21 14:31:00	2.22	WB3 Walfisch n.	1995-08-02 15:35:00	5.7	1.58	SH2 Tessmannsdorf nw.	2002-08-05 11:35:00	33.3	SH2 Tessmannsdorf nw.	2002-07-01 08:15:00	1.92	SH2 Tessmannsdorf nw.	2002-07-01 08:15:00	4.5	4.8	UW4 Warnowwerft	1992-01-13 15:02:00	33.9	UW4 Warnowwerft	1991-12-11 09:41:00	3.79	UW4 Warnowwerft	1994-07-25 16:26:00	64.4	0.55	DB2 Sundische Wiese	1998-06-11 09:35:00	134	DB2 Sundische Wiese	1998-06-11 09:35:00	4.06	DB2 Sundische Wiese	1998-10-29 09:54:00	57.2	0.5	KB90 Fahrwasser I.Libitz w.	1996-05-22 08:05:00	38.1	KB90 Fahrwasser I.Libitz w.	1996-05-22 08:05:00	1.39	KB90 Fahrwasser I.Libitz w.	1995-03-02 08:21:00	22.1	0.9
WB3 Walfisch n.	1992-09-21 12:36:00	24.4	WB3 Walfisch n.	1992-09-21 12:36:00	2.25	WB3 Walfisch n.	1995-10-24 13:55:00	6.5	4	SH2 Tessmannsdorf nw.	2002-09-04 08:40:00	31.6	SH2 Tessmannsdorf nw.	2002-08-05 11:35:00	1.52	SH2 Tessmannsdorf nw.	2002-08-05 11:35:00	5.6	4.9	UW4 Warnowwerft	1992-01-13 15:02:00	32.4	UW4 Warnowwerft	1992-01-13 15:02:00	1.16	UW4 Warnowwerft	1994-08-16 16:24:00	2.7	1.2	DB2 Sundische Wiese	1998-07-30 09:46:00	53.2	DB2 Sundische Wiese	1998-07-30 09:46:00	1.95	DB2 Sundische Wiese	1999-01-20 11:32:00	43.6	0.7	KB90 Fahrwasser I.Libitz w.	1996-06-17 09:18:00	19.4	KB90 Fahrwasser I.Libitz w.	1996-06-17 09:18:00	0.7	KB90 Fahrwasser I.Libitz w.	1995-04-24 08:30:00	6.9	2.05
WB3 Walfisch n.	1992-09-21 12:36:00	22.4	WB3 Walfisch n.	1992-09-21 12:36:00	1.93	WB3 Walfisch n.	1995-11-14 14:16:00	5.6	4	SH2 Tessmannsdorf nw.	2002-10-21 11:34:00	6.6	SH2 Tessmannsdorf nw.	2002-09-04 08:40:00	1.34	SH2 Tessmannsdorf nw.	2002-09-04 08:40:00	1.1	3.5	UW4 Warnowwerft	1992-02-10 13:49:00	169.7	UW4 Warnowwerft	1992-01-13 15:02:00	1.41	UW4 Warnowwerft	1994-09-19 15:58:00	1.5	1.75	DB2 Sundische Wiese	1998-08-13 10:04:00	63	DB2 Sundische Wiese	1998-08-13 10:04:00	1.83	DB2 Sundische Wiese	1999-02-03 10:55:00	35.2	0.55	KB90 Fahrwasser I.Libitz w.	1996-06-26 13:11:00	25.2	KB90 Fahrwasser I.Libitz w.	1996-06-26 13:11:00	0.7	KB90 Fahrwasser I.Libitz w.	1995-05-11 08:29:00	11.2	1.48
WB3 Walfisch n.	1992-10-19 14:30:00	19.8	WB3 Walfisch n.	1992-10-19 14:30:00	4.1	WB3 Walfisch n.	1996-04-23 12:37:00	2.2	5.5	SH2 Tessmannsdorf nw.	2002-11-04 09:55:00	73.8	SH2 Tessmannsdorf nw.	2002-10-21 11:34:00	0.69	SH2 Tessmannsdorf nw.	2002-10-21 11:34:00	3.3	4.7	UW4 Warnowwerft	1992-02-10 13:49:00	190	UW4 Warnowwerft	1992-02-10 13:49:00	2.98	UW4 Warnowwerft	1994-10-17 16:25:00	1.6	2.5	DB2 Sundische Wiese	1998-09-30 10:21:00	61	DB2 Sundische Wiese	1998-09-30 10:21:00	1.53	DB2 Sundische Wiese	1999-03-22 10:30:00	29.5	0.6	KB90 Fahrwasser I.Libitz w.	1996-07-04 12:27:00	22.7	KB90 Fahrwasser I.Libitz w.	1996-07-04 12:27:00	1	KB90 Fahrwasser I.Libitz w.	1995-06-29 08:33:00	11.2	1.42
WB3 Walfisch n.	1992-10-19 14:30:00	20.1	WB3 Walfisch n.	1992-10-19 14:30:00	1.46	WB3 Walfisch n.	1996-05-14 14:50:00	2.5	3.5	SH2 Tessmannsdorf nw.	2003-03-25 14:45:00	45.6	SH2 Tessmannsdorf nw.	2002-11-04 09:55:00	0.67	SH2 Tessmannsdorf nw.	2002-11-04 09:55:00	2.3	3.6	UW4 Warnowwerft	1992-03-09 14:04:00	207.7	UW4 Warnowwerft	1992-02-10 13:49:00	3.84	UW4 Warnowwerft	1994-11-08 14:01:00	2.4	2.5	DB2 Sundische Wiese	1998-10-29 09:54:00	128	DB2 Sundische Wiese	1998-10-29 09:54:00	4.9	DB2 Sundische Wiese	1999-04-19 12:05:00	68.7	0.3	KB90 Fahrwasser I.Libitz w.	1996-07-17 12:56:00	15.6	KB90 Fahrwasser I.Libitz w.	1996-07-17 12:56:00	0.5	KB90 Fahrwasser I.Libitz w.	1995-07-18 12:43:00	20.2	0.83
WB3 Walfisch n.	1992-11-10 14:01:00	33.4	WB3 Walfisch n.	1992-11-10 14:01:00	6.6	WB3 Walfisch n.	1996-06-18 13:42:00	7.4	3	SH2 Tessmannsdorf nw.	2003-04-29 09:30:00	21.4	SH2 Tessmannsdorf nw.	2003-03-25 14:45:00	0.61	SH2 Tessmannsdorf nw.	2003-03-25 14:45:00	2.3	2.8	UW4 Warnowwerft	1992-03-09 14:04:00	184.8	UW4 Warnowwerft	1992-03-09 14:04:00	1.69	UW4 Warnowwerft	1994-12-05 16:20:00	1.2		DB2 Sundische Wiese	1999-01-20 11:32:00	172	DB2 Sundische Wiese	1999-01-20 11:32:00	2.87	DB2 Sundische Wiese	1999-05-27 10:12:00	54.2	0.4	KB90 Fahrwasser I.Libitz w.	1996-08-01 09:02:00	26.2	KB90 Fahrwasser I.Libitz w.	1996-08-01 09:02:00	1.31	KB90 Fahrwasser I.Libitz w.	1995-08-21 09:04:00	22.1	0.64
WB3 Walfisch n.	1992-11-10 14:01:00	32.1	WB3 Walfisch n.	1992-11-10 14:01:00	2.28	WB3 Walfisch n.	1996-07-11 13:58:00	2.2	2.5	SH2 Tessmannsdorf nw.	2003-05-21 09:04:00	37	SH2 Tessmannsdorf nw.	2003-04-29 09:30:00	0.45	SH2 Tessmannsdorf nw.	2003-04-29 09:30:00	1.9	4.9	UW4 Warnowwerft	1992-04-13 12:05:00	202.5	UW4 Warnowwerft	1992-03-09 14:04:00	3.34	UW4 Warnowwerft	1995-02-13 16:02:00	5.2	1.5	DB2 Sundische Wiese	1999-02-03 10:55:00	208	DB2 Sundische Wiese	1999-02-03 10:55:00	3.24	DB2 Sundische Wiese	1999-06-01 10:13:00	52.2	0.5	KB90 Fahrwasser I.Libitz w.	1996-08-15 08:17:00	36.3	KB90 Fahrwasser I.Libitz w.	1996-08-15 08:17:00	2.2	KB90 Fahrwasser I.Libitz w.	1995-09-07 09:39:00	7.9	1.65
WB3 Walfisch n.	1992-12-02 11:35:00	45.8	WB3 Walfisch n.	1992-12-02 11:35:00	1.52	WB3 Walfisch n.	1996-08-13 15:48:00	6.5	2.5	SH2 Tessmannsdorf nw.	2003-06-11 09:45:00	38	SH2 Tessmannsdorf nw.	2003-05-21 09:04:00	1.33	SH2 Tessmannsdorf nw.	2003-05-21 09:04:00	4.4	4.8	UW4 Warnowwerft	1992-04-13 12:05:00	222.3	UW4 Warnowwerft	1992-04-13 12:05:00	1.18	UW4 Warnowwerft	1995-04-18 14:34:00	14.8	0.86	DB2 Sundische Wiese	1999-03-22 10:30:00	248	DB2 Sundische Wiese	1999-03-22 10:30:00	2.9	DB2 Sundische Wiese	1999-07-15 09:40:00	53.2	0.6	KB90 Fahrwasser I.Libitz w.	1996-09-04 13:40:00	27.3	KB90 Fahrwasser I.Libitz w.	1996-09-04 13:40:00	1.4	KB90 Fahrwasser I.Libitz w.	1995-10-26 08:40:00	7.7	1.25
WB3 Walfisch n.	1992-12-02 11:35:00	56.9	WB3 Walfisch n.	1992-12-02 11:35:00	1.79	WB3 Walfisch n.	1996-09-24 13:56:00	1.6	4.5	SH2 Tessmannsdorf nw.	2003-08-11 11:26:00	29.3	SH2 Tessmannsdorf nw.	2003-06-11 09:45:00	2.05	SH2 Tessmannsdorf nw.	2003-06-11 09:45:00	4.4	3.5	UW4 Warnowwerft	1992-05-11 13:50:00	115	UW4 Warnowwerft	1992-04-13 12:05:00	1.1	UW4 Warnowwerft	1995-05-02 14:37:00	18.5	0.9	DB2 Sundische Wiese	1999-04-19 12:05:00	191	DB2 Sundische Wiese	1999-04-19 12:05:00	5.12	DB2 Sundische Wiese	1999-08-30 09:45:00	32.5	0.7	KB90 Fahrwasser I.Libitz w.	1996-09-26 08:26:00	29.5	KB90 Fahrwasser I.Libitz w.	1996-09-26 08:26:00	1.76	KB90 Fahrwasser I.Libitz w.	1995-11-01 10:25:00	9.6	1.1
WB3 Walfisch n.	1993-02-16 12:26:00	45.4	WB3 Walfisch n.	1993-02-16 12:26:00	1.32	WB3 Walfisch n.	1996-10-08 13:55:00	3.1	4.5	SH2 Tessmannsdorf nw.	2003-09-22 11:20:00	26.4	SH2 Tessmannsdorf nw.	2003-07-03 08:10:00	2.27	SH2 Tessmannsdorf nw.	2003-07-03 08:10:00	9.4	3.5	UW4 Warnowwerft	1992-05-11 13:50:00	115	UW4 Warnowwerft	1992-05-11 13:50:00	3.24	UW4 Warnowwerft	1995-06-26 15:47:00	39	0.82	DB2 Sundische Wiese	1999-05-27 10:12:00	136	DB2 Sundische Wiese	1999-05-27 10:12:00	3.91	DB2 Sundische Wiese	1999-09-06 09:25:00	41.4	0.8	KB90 Fahrwasser I.Libitz w.	1996-10-01 09:37:00	28.9	KB90 Fahrwasser I.Libitz w.	1996-10-01 09:37:00	1.66	KB90 Fahrwasser I.Libitz w.	1995-12-14 09:12:00	10.7	0.6
WB3 Walfisch n.	1993-02-16 12:26:00	44.7	WB3 Walfisch n.	1993-02-16 12:26:00	1.27	WB3 Walfisch n.	1996-11-26 13:53:00	2	4.5	SH2 Tessmannsdorf nw.	2003-10-23 10:15:00	22	SH2 Tessmannsdorf nw.	2003-08-11 11:26:00	3.22	SH2 Tessmannsdorf nw.	2003-08-11 11:26:00	2.3	4.9	UW4 Warnowwerft	1992-06-09 14:35:00	37.6	UW4 Warnowwerft	1992-05-11 13:50:00	1.27	UW4 Warnowwerft	1995-07-03 16:13:00	38.9	0.92	DB2 Sundische Wiese	1999-06-01 10:13:00	123	DB2 Sundische Wiese	1999-06-01 10:13:00	3.7	DB2 Sundische Wiese	1999-10-04 11:01:00	64	0.7	KB90 Fahrwasser I.Libitz w.	1996-10-17 14:16:00	26.6	KB90 Fahrwasser I.Libitz w.	1996-10-17 14:16:00	1.19	KB90 Fahrwasser I.Libitz w.	1996-04-17 14:02:00	7.1	1.5
WB3 Walfisch n.	1993-03-16 12:55:00	22	WB3 Walfisch n.	1993-03-16 12:55:00	0.97	WB3 Walfisch n.	1996-12-17 14:29:00	1.8	5.1	SH2 Tessmannsdorf nw.	2003-11-13 10:05:00	25.1	SH2 Tessmannsdorf nw.	2003-09-22 11:20:00	1.28	SH2 Tessmannsdorf nw.	2003-09-22 11:20:00	1.4	3.6	UW4 Warnowwerft	1992-06-09 14:35:00	55.3	UW4 Warnowwerft	1992-06-09 14:35:00	5.7	UW4 Warnowwerft	1995-08-01 16:06:00	63.1	0.58	DB2 Sundische Wiese	1999-07-15 09:40:00	114	DB2 Sundische Wiese	1999-07-15 09:40:00	4.26	DB2 Sundische Wiese	1999-11-30 09:50:00	43.1	0.7	KB90 Fahrwasser I.Libitz w.	1996-11-19 13:34:00	46.5	KB90 Fahrwasser I.Libitz w.	1996-11-19 13:34:00	2.33	KB90 Fahrwasser I.Libitz w.	1996-04-25 08:09:00	6.6	2
WB3 Walfisch n.	1993-03-16 12:55:00	16.2	WB3 Walfisch n.	1993-03-16 12:55:00	0.59	WB3 Walfisch n.	1997-02-26 13:31:00	2.6	2.5	SH2 Tessmannsdorf nw.	2003-12-08 09:25:00	39.1	SH2 Tessmannsdorf nw.	2003-10-23 10:15:00	0.77	SH2 Tessmannsdorf nw.	2003-10-23 10:15:00	1.4	2.8	UW4 Warnowwerft	1992-07-13 13:46:00	29.5	UW4 Warnowwerft	1992-06-09 14:35:00	1.55	UW4 Warnowwerft	1995-10-23 16:11:00	4.7	2.5	DB2 Sundische Wiese	1999-08-30 09:45:00	80.7	DB2 Sundische Wiese	1999-08-30 09:45:00	2.28	DB2 Sundische Wiese	1999-12-21 09:43:00	24.6	1	KB90 Fahrwasser I.Libitz w.	1996-11-21 09:28:00	43.7	KB90 Fahrwasser I.Libitz w.	1996-11-21 09:28:00	1.95	KB90 Fahrwasser I.Libitz w.	1996-05-02 12:36:00	11.1	1.5
WB3 Walfisch n.	1993-05-25 13:37:00	10.6	WB3 Walfisch n.	1993-05-25 13:37:00	0.93	WB3 Walfisch n.	1997-03-18 13:06:00	1.3	6	SH2 Tessmannsdorf nw.	2004-01-22 10:10:00	74.2	SH2 Tessmannsdorf nw.	2003-11-13 10:05:00	0.51	SH2 Tessmannsdorf nw.	2003-11-13 10:05:00	1.7	2.6	UW4 Warnowwerft	1992-07-13 13:46:00	35.8	UW4 Warnowwerft	1992-07-13 13:46:00	1.23	UW4 Warnowwerft	1995-11-13 15:39:00	1.8	1.8	DB2 Sundische Wiese	1999-09-06 09:25:00	78.8	DB2 Sundische Wiese	1999-09-06 09:25:00	2.12	DB2 Sundische Wiese	2000-01-20 10:00:00	12.7	0.7	KB90 Fahrwasser I.Libitz w.	1996-12-03 13:23:00	46.3	KB90 Fahrwasser I.Libitz w.	1996-12-03 13:23:00	1.73	KB90 Fahrwasser I.Libitz w.	1996-05-22 08:05:00	10.2	0.9
WB3 Walfisch n.	1993-05-25 13:37:00	13.6	WB3 Walfisch n.	1993-05-25 13:37:00	0.94	WB3 Walfisch n.	1997-04-22 13:36:00	2.3	4.5	SH2 Tessmannsdorf nw.	2004-02-16 09:35:00	135	SH2 Tessmannsdorf nw.	2003-12-08 09:25:00	1.54	SH2 Tessmannsdorf nw.	2004-01-22 10:10:00	1.8	3.6	UW4 Warnowwerft	1992-08-26 14:00:00	53.4	UW4 Warnowwerft	1992-07-13 13:46:00	0.93	UW4 Warnowwerft	1996-04-22 16:38:00	5.7	2	DB2 Sundische Wiese	1999-10-04 11:01:00	116	DB2 Sundische Wiese	1999-10-04 11:01:00	2.96	DB2 Sundische Wiese	2000-02-29 10:03:00	30.3	0.8	KB90 Fahrwasser I.Libitz w.	1996-12-11 09:02:00	45	KB90 Fahrwasser I.Libitz w.	1996-12-11 09:02:00	1.84	KB90 Fahrwasser I.Libitz w.	1996-06-17 09:18:00	2.9	2.5
WB3 Walfisch n.	1993-07-20 12:43:00	23.1	WB3 Walfisch n.	1993-07-20 12:43:00	1.64	WB3 Walfisch n.	1997-05-13 13:56:00	1.6	4.5	SH2 Tessmannsdorf nw.	2004-03-09 09:25:00	99.4	SH2 Tessmannsdorf nw.	2004-01-22 10:10:00	0.86	SH2 Tessmannsdorf nw.	2004-02-16 09:35:00	2.8	3.6	UW4 Warnowwerft	1992-08-26 14:00:00	83.2	UW4 Warnowwerft	1992-08-26 14:00:00	7.29	UW4 Warnowwerft	1996-05-13 15:56:00	12.2	1.5	DB2 Sundische Wiese	1999-11-30 09:50:00	88.9	DB2 Sundische Wiese	1999-11-30 09:50:00	2.51	DB2 Sundische Wiese	2000-03-08 09:25:00	47.7	0.5	KB90 Fahrwasser I.Libitz w.	1997-03-05 14:10:00	46.4	KB90 Fahrwasser I.Libitz w.	1997-03-05 14:10:00	0.81	KB90 Fahrwasser I.Libitz w.	1996-06-26 13:11:00	3.2	2.5
WB3 Walfisch n.	1993-07-20 12:43:00	27.5	WB3 Walfisch n.	1993-07-20 12:43:00	0.94	WB3 Walfisch n.	1997-06-10 14:43:00	1.7	5	SH2 Tessmannsdorf nw.	2004-04-22 17:45:00	24.5	SH2 Tessmannsdorf nw.	2004-02-16 09:35:00	0.84	SH2 Tessmannsdorf nw.	2004-03-09 09:25:00	1.7	3.8	UW4 Warnowwerft	1992-09-07 13:32:00	71.1	UW4 Warnowwerft	1992-08-26 14:00:00	7	UW4 Warnowwerft	1996-06-17 15:55:00	62.5	0.8	DB2 Sundische Wiese	1999-12-21 09:43:00	83.4	DB2 Sundische Wiese	1999-12-21 09:43:00	1.85	DB2 Sundische Wiese	2000-04-26 10:35:00	72.5	0.6	KB90 Fahrwasser I.Libitz w.	1997-03-24 08:52:00	35.4	KB90 Fahrwasser I.Libitz w.	1997-03-24 08:52:00	0.8	KB90 Fahrwasser I.Libitz w.	1996-07-04 12:27:00	4.4	1.3
WB3 Walfisch n.	1993-08-10 16:52:00	24.9	WB3 Walfisch n.	1993-08-10 16:52:00	0.95	WB3 Walfisch n.	1997-07-22 17:03:00	8.7	3.8	SH2 Tessmannsdorf nw.	2004-05-06 07:51:00	19.9	SH2 Tessmannsdorf nw.	2004-03-09 09:25:00	1.26	SH2 Tessmannsdorf nw.	2004-04-22 17:45:00	2.2	5.2	UW4 Warnowwerft	1992-09-07 13:32:00	88.5	UW4 Warnowwerft	1992-09-07 13:32:00	6.36	UW4 Warnowwerft	1996-07-08 14:06:00	19.1	1.2	DB2 Sundische Wiese	2000-01-20 10:00:00	66.6	DB2 Sundische Wiese	2000-01-20 10:00:00	1	DB2 Sundische Wiese	2000-05-18 11:02:00	68.3	0.5	KB90 Fahrwasser I.Libitz w.	1997-04-14 09:25:00	34.5	KB90 Fahrwasser I.Libitz w.	1997-04-14 09:25:00	0.95	KB90 Fahrwasser I.Libitz w.	1996-07-17 12:56:00	1.9	3
WB3 Walfisch n.	1993-08-10 16:52:00	21.7	WB3 Walfisch n.	1993-08-10 16:52:00	1.51	WB3 Walfisch n.	1997-08-19 17:20:00	11.4	1.5	SH2 Tessmannsdorf nw.	2004-06-09 10:31:00	21.4	SH2 Tessmannsdorf nw.	2004-04-22 17:45:00	1.13	SH2 Tessmannsdorf nw.	2004-05-06 07:51:00	4	4.8	UW4 Warnowwerft	1992-10-07 15:02:00	59.6	UW4 Warnowwerft	1992-09-07 13:32:00	9.22	UW4 Warnowwerft	1996-08-12 16:26:00	15.8	1.1	DB2 Sundische Wiese	2000-02-29 10:03:00	170	DB2 Sundische Wiese	2000-02-29 10:03:00	1.92	DB2 Sundische Wiese	2000-06-05 11:40:00	37.7	0.6	KB90 Fahrwasser I.Libitz w.	1997-05-29 08:40:00	46.1	KB90 Fahrwasser I.Libitz w.	1997-05-29 08:40:00	1.34	KB90 Fahrwasser I.Libitz w.	1996-08-01 09:02:00	9.4	1
WB3 Walfisch n.	1993-09-15 15:50:00	16.5	WB3 Walfisch n.	1993-09-15 15:50:00	1.25	WB3 Walfisch n.	1997-11-11 14:02:00	2.3	6.5	SH2 Tessmannsdorf nw.	2004-07-13 08:45:00	25.4	SH2 Tessmannsdorf nw.	2004-05-06 07:51:00	0.75	SH2 Tessmannsdorf nw.	2004-06-09 10:31:00	1.5	3.9	UW4 Warnowwerft	1992-10-07 15:02:00	66.9	UW4 Warnowwerft	1992-10-07 15:02:00	6.38	UW4 Warnowwerft	1996-09-23 16:26:00	9.2	1.5	DB2 Sundische Wiese	2000-03-08 09:25:00	163	DB2 Sundische Wiese	2000-03-08 09:25:00	3.16	DB2 Sundische Wiese	2000-07-31 10:08:00	32.3	1	KB90 Fahrwasser I.Libitz w.	1997-06-05 12:06:00	39.4	KB90 Fahrwasser I.Libitz w.	1997-06-05 12:06:00	1.39	KB90 Fahrwasser I.Libitz w.	1996-08-15 08:17:00	10.2	1.5
WB3 Walfisch n.	1993-09-15 15:50:00	17.6	WB3 Walfisch n.	1993-09-15 15:50:00	0.96	WB3 Walfisch n.	1998-01-20 12:55:00	1	4.2	SH2 Tessmannsdorf nw.	2004-08-19 08:34:00	18.1	SH2 Tessmannsdorf nw.	2004-06-09 10:31:00	1.23	SH2 Tessmannsdorf nw.	2004-07-13 08:45:00	2.7	4.9	UW4 Warnowwerft	1992-11-09 13:10:00	92.1	UW4 Warnowwerft	1992-10-07 15:02:00	5.36	UW4 Warnowwerft	1996-10-07 16:42:00	7.4	2	DB2 Sundische Wiese	2000-04-26 10:35:00	96.1	DB2 Sundische Wiese	2000-04-26 10:35:00	2.16	DB2 Sundische Wiese	2000-08-16 09:55:00	21.3	0.95	KB90 Fahrwasser I.Libitz w.	1997-06-12 12:12:00	39.9	KB90 Fahrwasser I.Libitz w.	1997-06-12 12:12:00	1.69	KB90 Fahrwasser I.Libitz w.	1996-09-04 13:40:00	10.1	1.2
WB3 Walfisch n.	1993-10-11 17:00:00	20.3	WB3 Walfisch n.	1993-10-11 17:00:00	1.04	WB3 Walfisch n.	1998-02-11 10:30:00	0.7	4.5	SH2 Tessmannsdorf nw.	2004-09-30 09:35:00	25.4	SH2 Tessmannsdorf nw.	2004-07-13 08:45:00	0.85	SH2 Tessmannsdorf nw.	2004-08-19 08:34:00	5.5	4.7	UW4 Warnowwerft	1992-11-09 13:10:00	99.5	UW4 Warnowwerft	1992-11-09 13:10:00	4.73	UW4 Warnowwerft	1996-11-25 16:01:00	3.1	1.5	DB2 Sundische Wiese	2000-05-18 11:02:00	122	DB2 Sundische Wiese	2000-05-18 11:02:00	3.12	DB2 Sundische Wiese	2000-09-07 09:40:00	37.9	0.9	KB90 Fahrwasser I.Libitz w.	1997-07-15 13:42:00	47.4	KB90 Fahrwasser I.Libitz w.	1997-07-15 13:42:00	2.13	KB90 Fahrwasser I.Libitz w.	1996-09-26 08:26:00	10.8	1.7
WB3 Walfisch n.	1993-10-11 17:00:00	15.7	WB3 Walfisch n.	1993-10-11 17:00:00	0.53	WB3 Walfisch n.	1998-03-18 11:00:00	3.5	4.1	SH2 Tessmannsdorf nw.	2004-10-06 16:00:00	29.5	SH2 Tessmannsdorf nw.	2004-08-19 08:34:00	2.18	SH2 Tessmannsdorf nw.	2004-09-30 09:35:00	1.6	3.6	UW4 Warnowwerft	1992-12-01 12:48:00	107.9	UW4 Warnowwerft	1992-11-09 13:10:00	3.56	UW4 Warnowwerft	1996-12-16 16:03:00	2.2	1.3	DB2 Sundische Wiese	2000-06-05 11:40:00	117	DB2 Sundische Wiese	2000-06-05 11:40:00	3.5	DB2 Sundische Wiese	2000-11-02 09:55:00	46.9	0.6	KB90 Fahrwasser I.Libitz w.	1997-08-11 15:54:00	50.9	KB90 Fahrwasser I.Libitz w.	1997-08-11 15:54:00	2.32	KB90 Fahrwasser I.Libitz w.	1996-10-01 09:37:00	13.9	1.1
WB3 Walfisch n.	1994-01-04 12:22:00	58.8	WB3 Walfisch n.	1994-01-04 12:22:00	1.6	WB3 Walfisch n.	1998-04-15 10:00:00	1.2	7	SH2 Tessmannsdorf nw.	2004-11-24 09:30:00	42.6	SH2 Tessmannsdorf nw.	2004-09-30 09:35:00	3.63	SH2 Tessmannsdorf nw.	2004-10-06 16:00:00	2.7	3.4	UW4 Warnowwerft	1992-12-01 12:48:00	111	UW4 Warnowwerft	1992-12-01 12:48:00	3.63	UW4 Warnowwerft	1997-02-24 15:50:00	4.3	2.8	DB2 Sundische Wiese	2000-07-31 10:08:00	65.8	DB2 Sundische Wiese	2000-07-31 10:08:00	1.95	DB2 Sundische Wiese	2000-11-28 09:46:00	24.4	1.1	KB90 Fahrwasser I.Libitz w.	1997-09-08 12:05:00	41.6	KB90 Fahrwasser I.Libitz w.	1997-09-08 12:05:00	1.87	KB90 Fahrwasser I.Libitz w.	1996-10-17 14:16:00	12.7	1.5
WB3 Walfisch n.	1994-02-08 13:15:00	70.7	WB3 Walfisch n.	1994-02-08 13:15:00	2.11	WB3 Walfisch n.	1998-05-19 15:50:00	2.1	3.8	SH2 Tessmannsdorf nw.	2004-12-09 09:45:00	49	SH2 Tessmannsdorf nw.	2004-10-06 16:00:00	0.96	SH2 Tessmannsdorf nw.	2004-11-24 09:30:00	3.2	4.8	UW4 Warnowwerft	1993-02-15 13:33:00	206.9	UW4 Warnowwerft	1992-12-01 12:48:00	2.95	UW4 Warnowwerft	1997-03-17 16:40:00	5.5	2.4	DB2 Sundische Wiese	2000-08-16 09:55:00	56.6	DB2 Sundische Wiese	2000-08-16 09:55:00	1.27	DB2 Sundische Wiese	2001-01-04 13:26:00	30.6	1	KB90 Fahrwasser I.Libitz w.	1997-10-20 10:18:00	31.8	KB90 Fahrwasser I.Libitz w.	1997-10-20 10:18:00	0.9	KB90 Fahrwasser I.Libitz w.	1996-11-19 13:34:00	8	1.2
WB3 Walfisch n.	1994-03-22 11:45:00	64.1	WB3 Walfisch n.	1994-03-22 11:45:00	1.09	WB3 Walfisch n.	1998-06-09 12:55:00	2.8	3.8	SH2 Tessmannsdorf nw.	2005-01-27 14:00:00	61.5	SH2 Tessmannsdorf nw.	2004-11-24 09:30:00	0.85	SH2 Tessmannsdorf nw.	2004-12-09 09:45:00	1.3	3.8	UW4 Warnowwerft	1993-02-15 13:33:00	216.7	UW4 Warnowwerft	1993-02-15 13:33:00	2.28	UW4 Warnowwerft	1997-04-21 16:05:00	13.7	1.8	DB2 Sundische Wiese	2000-09-07 09:40:00	54.1	DB2 Sundische Wiese	2000-09-07 09:40:00	2.19	DB2 Sundische Wiese	2001-02-26 13:25:00	30.5	0.8	KB90 Fahrwasser I.Libitz w.	1997-10-28 08:29:00	25	KB90 Fahrwasser I.Libitz w.	1997-10-28 08:29:00	0.26	KB90 Fahrwasser I.Libitz w.	1996-11-21 09:28:00	8	1.8
WB3 Walfisch n.	1994-04-21 10:08:00	55.5	WB3 Walfisch n.	1994-04-21 10:08:00	0.59	WB3 Walfisch n.	1998-07-28 12:54:00	5.5	3	SH2 Tessmannsdorf nw.	2005-02-22 10:58:00	68.1	SH2 Tessmannsdorf nw.	2004-12-09 09:45:00	0.47	SH2 Tessmannsdorf nw.	2005-01-27 14:00:00	1.5	3.8	UW4 Warnowwerft	1993-03-15 17:07:00	192.6	UW4 Warnowwerft	1993-02-15 13:33:00	3.04	UW4 Warnowwerft	1997-05-12 16:48:00	6.3	1.8	DB2 Sundische Wiese	2000-11-02 09:55:00	83.1	DB2 Sundische Wiese	2000-11-02 09:55:00	2.18	DB2 Sundische Wiese	2001-04-09 13:32:00	66.8	0.7	KB90 Fahrwasser I.Libitz w.	1997-11-24 08:33:00	38.2	KB90 Fahrwasser I.Libitz w.	1997-11-24 08:33:00	1.2	KB90 Fahrwasser I.Libitz w.	1996-12-03 13:23:00	7.4	1.4
WB3 Walfisch n.	1994-07-26 12:05:00	24.2	WB3 Walfisch n.	1994-07-26 12:05:00	2.39	WB3 Walfisch n.	1998-08-11 15:47:00	2.8	2.8	SH2 Tessmannsdorf nw.	2005-03-30 10:13:00	93.5	SH2 Tessmannsdorf nw.	2005-01-27 14:00:00	0.77	SH2 Tessmannsdorf nw.	2005-02-22 10:58:00	1.3	3.6	UW4 Warnowwerft	1993-03-15 17:07:00	195.4	UW4 Warnowwerft	1993-03-15 17:07:00	2.81	UW4 Warnowwerft	1997-06-09 16:26:00	18.2	1.5	DB2 Sundische Wiese	2000-11-28 09:46:00	61.9	DB2 Sundische Wiese	2000-11-28 09:46:00	1.75	DB2 Sundische Wiese	2001-06-21 12:07:00	26.2	0.8	KB90 Fahrwasser I.Libitz w.	1997-11-27 12:27:00	43.9	KB90 Fahrwasser I.Libitz w.	1997-11-27 12:27:00	1.73	KB90 Fahrwasser I.Libitz w.	1996-12-11 09:02:00	7.5	1.7
WB3 Walfisch n.	1994-08-17 14:57:00	29.5	WB3 Walfisch n.	1994-08-17 14:57:00	2.31	WB3 Walfisch n.	1998-09-15 14:01:00	2.2	6	SH2 Tessmannsdorf nw.	2005-04-27 08:42:00	18.4	SH2 Tessmannsdorf nw.	2005-02-22 10:58:00	0.71	SH2 Tessmannsdorf nw.	2005-03-30 10:13:00	1.9	4.9	UW4 Warnowwerft	1993-05-24 10:33:00	34.1	UW4 Warnowwerft	1993-03-15 17:07:00	3.93	UW4 Warnowwerft	1997-07-21 16:18:00	7.3	1.8	DB2 Sundische Wiese	2001-01-04 13:26:00	51.3	DB2 Sundische Wiese	2001-01-04 13:26:00	3.38	DB2 Sundische Wiese	2001-07-12 10:24:00	44.3	0.6	KB90 Fahrwasser I.Libitz w.	1997-12-08 14:30:00	37.2	KB90 Fahrwasser I.Libitz w.	1997-12-08 14:30:00	1.37	KB90 Fahrwasser I.Libitz w.	1997-03-05 14:10:00	9.1	1.5
WB3 Walfisch n.	1994-09-20 13:32:00	20.5	WB3 Walfisch n.	1994-09-20 13:32:00	1.26	WB3 Walfisch n.	1998-11-02 17:39:00	1.7	3.5	SH2 Tessmannsdorf nw.	2005-05-09 13:12:00	24.2	SH2 Tessmannsdorf nw.	2005-03-30 10:13:00	0.27	SH2 Tessmannsdorf nw.	2005-04-27 08:42:00	0.7	4.9	UW4 Warnowwerft	1993-05-24 10:33:00	41.5	UW4 Warnowwerft	1993-05-24 10:33:00	2.07	UW4 Warnowwerft	1997-08-18 16:37:00	27.9	1.1	DB2 Sundische Wiese	2001-02-26 13:25:00	88.9	DB2 Sundische Wiese	2001-02-26 13:25:00	2.16	DB2 Sundische Wiese	2001-08-14 11:15:00	32.8	0.45	KB90 Fahrwasser I.Libitz w.	1997-12-15 09:33:00	41.8	KB90 Fahrwasser I.Libitz w.	1997-12-15 09:33:00	1.3	KB90 Fahrwasser I.Libitz w.	1997-03-24 08:52:00	6.9	1.8
WB3 Walfisch n.	1994-10-18 13:03:00	23.1	WB3 Walfisch n.	1994-10-18 13:03:00	1.08	WB3 Walfisch n.	1998-12-10 13:45:00	2.1	2.2	SH2 Tessmannsdorf nw.	2005-06-20 07:10:00	50.8	SH2 Tessmannsdorf nw.	2005-04-27 08:42:00	0.28	SH2 Tessmannsdorf nw.	2005-05-09 13:12:00	2	3.8	UW4 Warnowwerft	1993-06-14 14:44:00	18.9	UW4 Warnowwerft	1993-05-24 10:33:00	1.42	UW4 Warnowwerft	1997-10-23 13:25:00	1.7	1.5	DB2 Sundische Wiese	2001-04-09 13:32:00	118	DB2 Sundische Wiese	2001-04-09 13:32:00	3.21	DB2 Sundische Wiese	2001-09-13 09:16:00	23.5	0.9	KB90 Fahrwasser I.Libitz w.	1998-01-12 15:30:00	52.7	KB90 Fahrwasser I.Libitz w.	1998-01-12 15:30:00	1.3	KB90 Fahrwasser I.Libitz w.	1997-04-14 09:25:00	6.1	0.9
WB3 Walfisch n.	1994-11-09 13:02:00	20.2	WB3 Walfisch n.	1994-11-09 13:02:00	1.33	WB3 Walfisch n.	1999-01-12 14:22:00	2.6	4	SH2 Tessmannsdorf nw.	2005-07-18 10:35:00	38.7	SH2 Tessmannsdorf nw.	2005-05-09 13:12:00	0.51	SH2 Tessmannsdorf nw.	2005-06-20 07:10:00	2.9	3.8	UW4 Warnowwerft	1993-06-14 14:44:00	34.9	UW4 Warnowwerft	1993-06-14 14:44:00	2.32	UW4 Warnowwerft	1997-11-10 15:53:00	2	2	DB2 Sundische Wiese	2001-06-21 12:07:00	70.5	DB2 Sundische Wiese	2001-06-21 12:07:00	2.58	DB2 Sundische Wiese	2001-10-22 10:23:00	45.8	0.7	KB90 Fahrwasser I.Libitz w.	1998-02-10 10:00:00	52.7	KB90 Fahrwasser I.Libitz w.	1998-02-10 10:00:00	1.22	KB90 Fahrwasser I.Libitz w.	1997-05-29 08:40:00	8.6	1.1
WB3 Walfisch n.	1995-02-14 12:42:00	60.8	WB3 Walfisch n.	1995-02-14 12:42:00	1.18	WB3 Walfisch n.	1999-02-23 15:15:00	1	3.3	SH2 Tessmannsdorf nw.	2005-08-29 08:45:00	29.7	SH2 Tessmannsdorf nw.	2005-06-20 07:10:00	2.12	SH2 Tessmannsdorf nw.	2005-07-18 10:35:00	3.4	3.2	UW4 Warnowwerft	1993-07-19 13:46:00	65.9	UW4 Warnowwerft	1993-06-14 14:44:00	1.29	UW4 Warnowwerft	1998-01-19 15:50:00	2.5	2.5	DB2 Sundische Wiese	2001-07-12 10:24:00	96.6	DB2 Sundische Wiese	2001-07-12 10:24:00	2.54	DB2 Sundische Wiese	2001-11-26 10:13:00	12.6	0.8	KB90 Fahrwasser I.Libitz w.	1998-03-02 09:56:00	43.5	KB90 Fahrwasser I.Libitz w.	1998-03-02 09:56:00	0.97	KB90 Fahrwasser I.Libitz w.	1997-06-05 12:06:00	7.2	1.5
WB3 Walfisch n.	1995-04-20 13:26:00	26.4	WB3 Walfisch n.	1995-04-20 13:26:00	0.67	WB3 Walfisch n.	1999-03-09 15:30:00	1.4	8.5	SH2 Tessmannsdorf nw.	2005-09-29 08:27:00	23.2	SH2 Tessmannsdorf nw.	2005-07-18 10:35:00	3.66	SH2 Tessmannsdorf nw.	2005-08-29 08:45:00	3.5	3.5	UW4 Warnowwerft	1993-07-19 13:46:00	33.7	UW4 Warnowwerft	1993-07-19 13:46:00	4.53	UW4 Warnowwerft	1998-02-12 10:30:00	1.4	4	DB2 Sundische Wiese	2001-08-14 11:15:00	40.4	DB2 Sundische Wiese	2001-08-14 11:15:00	1.05	DB2 Sundische Wiese	2002-01-30 10:23:00	51.6	0.3	KB90 Fahrwasser I.Libitz w.	1998-03-12 14:09:00	55.2	KB90 Fahrwasser I.Libitz w.	1998-03-12 14:09:00	0.92	KB90 Fahrwasser I.Libitz w.	1997-06-12 12:12:00	8.3	1.1
WB3 Walfisch n.	1995-05-03 13:42:00	19.4	WB3 Walfisch n.	1995-05-03 13:42:00	0.4	WB3 Walfisch n.	1999-05-05 10:56:00	1.6	6.4	SH2 Tessmannsdorf nw.	2005-10-20 15:36:00	23.6	SH2 Tessmannsdorf nw.	2005-08-29 08:45:00	1.81	SH2 Tessmannsdorf nw.	2005-09-29 08:27:00	1.5	4.7	UW4 Warnowwerft	1993-08-10 09:17:00	68.3	UW4 Warnowwerft	1993-07-19 13:46:00	2.01	UW4 Warnowwerft	1998-03-16 12:15:00	5.7	2.1	DB2 Sundische Wiese	2001-09-13 09:16:00	62.9	DB2 Sundische Wiese	2001-09-13 09:16:00	2.24	DB2 Sundische Wiese	2002-02-07 10:42:00	30.3	0.8	KB90 Fahrwasser I.Libitz w.	1998-04-28 08:45:00	33.2	KB90 Fahrwasser I.Libitz w.	1998-04-28 08:45:00	0.54	KB90 Fahrwasser I.Libitz w.	1997-07-15 13:42:00	6.4	1.1
WB3 Walfisch n.	1995-06-27 13:17:00	19.3	WB3 Walfisch n.	1995-06-27 13:17:00	1.07	WB3 Walfisch n.	1999-06-15 14:43:00	2.1	5.2	SH2 Tessmannsdorf nw.	2005-11-21 09:15:00	17.2	SH2 Tessmannsdorf nw.	2005-09-29 08:27:00	1.31	SH2 Tessmannsdorf nw.	2005-10-20 15:36:00	1.2	4.7	UW4 Warnowwerft	1993-08-10 09:17:00	90.6	UW4 Warnowwerft	1993-08-10 09:17:00	6.1	UW4 Warnowwerft	1998-04-07 10:55:00	9.7	2	DB2 Sundische Wiese	2001-10-22 10:23:00	66.7	DB2 Sundische Wiese	2001-10-22 10:23:00	1.6	DB2 Sundische Wiese	2002-03-06 14:00:00	48.1	0.4	KB90 Fahrwasser I.Libitz w.	1998-05-04 10:50:00	39.1	KB90 Fahrwasser I.Libitz w.	1998-05-04 10:50:00	0.92	KB90 Fahrwasser I.Libitz w.	1997-08-11 15:54:00	23.3	1
WB3 Walfisch n.	1995-07-06 13:09:00	17.6	WB3 Walfisch n.	1995-07-06 13:09:00	1.11	WB3 Walfisch n.	1999-07-06 16:18:00	17.3	2.1	SH2 Tessmannsdorf nw.	2005-12-19 13:37:00	25.9	SH2 Tessmannsdorf nw.	2005-10-20 15:36:00	0.81	SH2 Tessmannsdorf nw.	2005-11-21 09:15:00	0.9	5.1	UW4 Warnowwerft	1993-09-16 08:54:00	115.3	UW4 Warnowwerft	1993-08-10 09:17:00	4.77	UW4 Warnowwerft	1998-05-05 15:32:00	5	2	DB2 Sundische Wiese	2001-11-26 10:13:00	44.4	DB2 Sundische Wiese	2001-11-26 10:13:00	1.71	DB2 Sundische Wiese	2002-04-18 09:39:00	31.2	0.9	KB90 Fahrwasser I.Libitz w.	1998-05-12 14:25:00	33.2	KB90 Fahrwasser I.Libitz w.	1998-05-12 14:25:00	0.89	KB90 Fahrwasser I.Libitz w.	1997-09-08 12:05:00	13.9	1.2
WB3 Walfisch n.	1995-08-02 15:35:00	29.3	WB3 Walfisch n.	1995-08-02 15:35:00	2.86	WB3 Walfisch n.	1999-08-18 17:00:00	3.7	3.8	SH2 Tessmannsdorf nw.	2006-04-24 11:37:00	112	SH2 Tessmannsdorf nw.	2005-11-21 09:15:00	0.55	SH2 Tessmannsdorf nw.	2005-12-19 13:37:00	1.4	4.5	UW4 Warnowwerft	1993-09-16 08:54:00	121.3	UW4 Warnowwerft	1993-09-16 08:54:00	7.18	UW4 Warnowwerft	1998-06-08 16:14:00	19.3	1.1	DB2 Sundische Wiese	2002-01-30 10:23:00	209	DB2 Sundische Wiese	2002-01-30 10:23:00	3.77	DB2 Sundische Wiese	2002-05-29 10:43:00	43.4	0.5	KB90 Fahrwasser I.Libitz w.	1998-05-13 08:56:00	34.1	KB90 Fahrwasser I.Libitz w.	1998-05-13 08:56:00	0.88	KB90 Fahrwasser I.Libitz w.	1997-10-20 10:18:00	12.4	2
WB3 Walfisch n.	1995-10-24 13:55:00	13.3	WB3 Walfisch n.	1995-10-24 13:55:00	0.76	WB3 Walfisch n.	1999-09-08 15:30:00	4.4	2.6	SH2 Tessmannsdorf nw.	2006-05-15 09:32:00	52.7	SH2 Tessmannsdorf nw.	2005-12-19 13:37:00	1.05	SH2 Tessmannsdorf nw.	2006-04-24 11:37:00	2.5	5.1	UW4 Warnowwerft	1993-10-12 08:58:00	58.7	UW4 Warnowwerft	1993-09-16 08:54:00	6.23	UW4 Warnowwerft	1998-07-27 15:50:00	26.9	1.1	DB2 Sundische Wiese	2002-02-07 10:42:00	131	DB2 Sundische Wiese	2002-02-07 10:42:00	1.92	DB2 Sundische Wiese	2002-06-12 10:05:00	53.5	0.4	KB90 Fahrwasser I.Libitz w.	1998-06-03 13:15:00	52.5	KB90 Fahrwasser I.Libitz w.	1998-06-03 13:15:00	2.23	KB90 Fahrwasser I.Libitz w.	1997-10-28 08:29:00	1.5	4
WB3 Walfisch n.	1995-11-14 14:16:00	22.3	WB3 Walfisch n.	1995-11-14 14:16:00	1.29	WB3 Walfisch n.	1999-10-19 16:30:00	6.9	3.3	SH2 Tessmannsdorf nw.	2006-06-22 06:35:00	80.9	SH2 Tessmannsdorf nw.	2006-04-24 11:37:00	0.62	SH2 Tessmannsdorf nw.	2006-05-15 09:32:00	2.1	4.7	UW4 Warnowwerft	1993-10-12 08:58:00	91.4	UW4 Warnowwerft	1993-10-12 08:58:00	2.68	UW4 Warnowwerft	1998-08-10 16:10:00	5.1	2	DB2 Sundische Wiese	2002-03-06 14:00:00	183	DB2 Sundische Wiese	2002-03-06 14:00:00	3.31	DB2 Sundische Wiese	2002-07-02 11:50:00	40.2	0.7	KB90 Fahrwasser I.Libitz w.	1998-06-11 08:18:00	58.5	KB90 Fahrwasser I.Libitz w.	1998-06-11 08:18:00	1.88	KB90 Fahrwasser I.Libitz w.	1997-11-24 08:33:00	3.1	3
WB3 Walfisch n.	1996-04-23 12:37:00	19.8	WB3 Walfisch n.	1996-04-23 12:37:00	0.25	WB3 Walfisch n.	1999-11-09 14:42:00	2.8	6.2	SH2 Tessmannsdorf nw.	2006-07-05 10:05:00	38	SH2 Tessmannsdorf nw.	2006-05-15 09:32:00	2.25	SH2 Tessmannsdorf nw.	2006-06-22 06:35:00	3.5	4.1	UW4 Warnowwerft	1994-01-03 14:00:00	325.7	UW4 Warnowwerft	1993-10-12 08:58:00	3.9	UW4 Warnowwerft	1998-09-14 16:50:00	2.7	1.5	DB2 Sundische Wiese	2002-04-18 09:39:00	107	DB2 Sundische Wiese	2002-04-18 09:39:00	1.19	DB2 Sundische Wiese	2002-09-04 10:20:00	55.2	0.6	KB90 Fahrwasser I.Libitz w.	1998-07-06 08:20:00	32.4	KB90 Fahrwasser I.Libitz w.	1998-07-06 08:20:00	1.53	KB90 Fahrwasser I.Libitz w.	1997-11-27 12:27:00	5.5	1.9
WB3 Walfisch n.	1996-05-14 14:50:00	24	WB3 Walfisch n.	1996-05-14 14:50:00	1	WB3 Walfisch n.	2000-01-11 14:12:00	0.8	5.8	SH2 Tessmannsdorf nw.	2006-08-01 07:59:00	69.4	SH2 Tessmannsdorf nw.	2006-06-22 06:35:00	3.94	SH2 Tessmannsdorf nw.	2006-07-05 10:05:00	4.5	4.2	UW4 Warnowwerft	1994-02-07 14:24:00	354.7	UW4 Warnowwerft	1994-01-03 14:00:00	3.52	UW4 Warnowwerft	1998-10-13 13:28:00	1.8	2	DB2 Sundische Wiese	2002-05-29 10:43:00	76.1	DB2 Sundische Wiese	2002-05-29 10:43:00	1.97	DB2 Sundische Wiese	2002-10-10 09:10:00	43.6	0.7	KB90 Fahrwasser I.Libitz w.	1998-07-23 13:11:00	45.6	KB90 Fahrwasser I.Libitz w.	1998-07-23 13:11:00	1.54	KB90 Fahrwasser I.Libitz w.	1997-12-08 14:30:00	19.9	3
WB3 Walfisch n.	1996-06-18 13:42:00	18.8	WB3 Walfisch n.	1996-06-18 13:42:00	1.22	WB3 Walfisch n.	2000-02-22 15:05:00	0.9	6	SH2 Tessmannsdorf nw.	2006-09-04 09:48:00	37.2	SH2 Tessmannsdorf nw.	2006-07-05 10:05:00	3.57	SH2 Tessmannsdorf nw.	2006-08-01 07:59:00	6.3	2.1	UW4 Warnowwerft	1994-03-21 15:22:00	415.8	UW4 Warnowwerft	1994-02-07 14:24:00	2.25	UW4 Warnowwerft	1998-11-03 15:12:00	9.3	1.7	DB2 Sundische Wiese	2002-06-12 10:05:00	66.7	DB2 Sundische Wiese	2002-06-12 10:05:00	2.62	DB2 Sundische Wiese	2002-11-13 11:00:00	28.3	0.8	KB90 Fahrwasser I.Libitz w.	1998-07-30 08:25:00	38.1	KB90 Fahrwasser I.Libitz w.	1998-07-30 08:25:00	1.35	KB90 Fahrwasser I.Libitz w.	1997-12-15 09:33:00	4.5	1.6
WB3 Walfisch n.	1996-07-11 13:58:00	21.3	WB3 Walfisch n.	1996-07-11 13:58:00	0.98	WB3 Walfisch n.	2000-03-20 16:02:00	5.3	3	SH2 Tessmannsdorf nw.	2006-10-18 10:25:00	27.3	SH2 Tessmannsdorf nw.	2006-08-01 07:59:00	8.45	SH2 Tessmannsdorf nw.	2006-09-04 09:48:00	8.8	2.1	UW4 Warnowwerft	1994-04-21 15:35:00	311.5	UW4 Warnowwerft	1994-03-21 15:22:00	2.48	UW4 Warnowwerft	1998-12-08 16:38:00	1.4	1.8	DB2 Sundische Wiese	2002-07-02 11:50:00	72	DB2 Sundische Wiese	2002-07-02 11:50:00	2.73	DB2 Sundische Wiese	2003-03-19 10:40:00	14.1	1.6	KB90 Fahrwasser I.Libitz w.	1998-08-06 07:52:00	43.6	KB90 Fahrwasser I.Libitz w.	1998-08-06 07:52:00	1.04	KB90 Fahrwasser I.Libitz w.	1998-01-12 15:30:00	5	1.8
WB3 Walfisch n.	1996-08-13 15:48:00	25.2	WB3 Walfisch n.	1996-08-13 15:48:00	1.58	WB3 Walfisch n.	2000-04-12 15:20:00	3.3	4.5	SH2 Tessmannsdorf nw.	2006-11-09 10:01:00	34.1	SH2 Tessmannsdorf nw.	2006-09-04 09:48:00	1.82	SH2 Tessmannsdorf nw.	2006-10-18 10:25:00	2.5	4.7	UW4 Warnowwerft	1994-07-25 16:26:00	92.8	UW4 Warnowwerft	1994-04-21 15:35:00	2.07	UW4 Warnowwerft	1999-01-11 15:05:00	1.4	1.5	DB2 Sundische Wiese	2002-09-04 10:20:00	117	DB2 Sundische Wiese	2002-09-04 10:20:00	7.31	DB2 Sundische Wiese	2003-04-10 09:48:00	4.9	2.3	KB90 Fahrwasser I.Libitz w.	1998-08-18 14:01:00	47	KB90 Fahrwasser I.Libitz w.	1998-08-18 14:01:00	1.37	KB90 Fahrwasser I.Libitz w.	1998-02-10 10:00:00	5.5	1.8
WB3 Walfisch n.	1996-09-24 13:56:00	17.4	WB3 Walfisch n.	1996-09-24 13:56:00	1.12	WB3 Walfisch n.	2000-06-15 13:52:00	4.9	3.7	SH2 Tessmannsdorf nw.	2006-12-13 10:35:00	56.9	SH2 Tessmannsdorf nw.	2006-10-18 10:25:00	0.94	SH2 Tessmannsdorf nw.	2006-11-09 10:01:00	5	2	UW4 Warnowwerft	1994-08-16 16:24:00	50.5	UW4 Warnowwerft	1994-07-25 16:26:00	4.92	UW4 Warnowwerft	1999-02-22 15:55:00	2.6	1.8	DB2 Sundische Wiese	2002-10-10 09:10:00	54.9	DB2 Sundische Wiese	2002-10-10 09:10:00	1.99	DB2 Sundische Wiese	2003-05-19 10:20:00	30.6	0.7	KB90 Fahrwasser I.Libitz w.	1998-09-03 13:57:00	33	KB90 Fahrwasser I.Libitz w.	1998-09-03 13:57:00	0.99	KB90 Fahrwasser I.Libitz w.	1998-03-02 09:56:00	6.8	1.5
WB3 Walfisch n.	1996-10-08 13:55:00	15.9	WB3 Walfisch n.	1996-10-08 13:55:00	0.99	WB3 Walfisch n.	2000-07-25 16:25:00	3.2	5	SH2 Tessmannsdorf nw.	2007-01-10 12:25:00	99.21	SH2 Tessmannsdorf nw.	2006-11-09 10:01:00	1.21	SH2 Tessmannsdorf nw.	2006-12-13 10:35:00	5.2	1.1	UW4 Warnowwerft	1994-09-19 15:58:00	59.1	UW4 Warnowwerft	1994-08-16 16:24:00	4.94	UW4 Warnowwerft	1999-03-08 15:45:00	2.6	2.5	DB2 Sundische Wiese	2002-11-13 11:00:00	53.9	DB2 Sundische Wiese	2002-11-13 11:00:00	1.63	DB2 Sundische Wiese	2003-06-16 10:30:00	23.1	0.9	KB90 Fahrwasser I.Libitz w.	1998-09-23 09:46:00	46.9	KB90 Fahrwasser I.Libitz w.	1998-09-23 09:46:00	1.71	KB90 Fahrwasser I.Libitz w.	1998-03-12 14:09:00	2.9	2
WB3 Walfisch n.	1996-11-26 13:53:00	31.1	WB3 Walfisch n.	1996-11-26 13:53:00	1.24	WB3 Walfisch n.	2000-08-22 17:25:00	9.1	2.2	SH2 Tessmannsdorf nw.	2007-02-07 12:28:00	157	SH2 Tessmannsdorf nw.	2006-12-13 10:35:00	1.22	SH2 Tessmannsdorf nw.	2007-01-10 12:25:00	3.7	2.2	UW4 Warnowwerft	1994-10-17 16:25:00	49.4	UW4 Warnowwerft	1994-09-19 15:58:00	6.18	UW4 Warnowwerft	1999-04-20 15:48:00	3.4	1.6	DB2 Sundische Wiese	2003-03-19 10:40:00	51.9	DB2 Sundische Wiese	2003-03-19 10:40:00	0.99	DB2 Sundische Wiese	2003-07-14 16:50:00	18.4	0.8	KB90 Fahrwasser I.Libitz w.	1998-09-28 09:30:00	48.1	KB90 Fahrwasser I.Libitz w.	1998-09-28 09:30:00	1.68	KB90 Fahrwasser I.Libitz w.	1998-04-28 08:45:00	5.6	2.2
WB3 Walfisch n.	1996-12-17 14:29:00	29.6	WB3 Walfisch n.	1996-12-17 14:29:00	1.09	WB3 Walfisch n.	2000-09-26 16:12:00	5	3.2	SH2 Tessmannsdorf nw.	2007-03-21 09:50:00	77.81	SH2 Tessmannsdorf nw.	2007-01-10 12:25:00	0.88	SH2 Tessmannsdorf nw.	2007-02-07 12:28:00	0.8	5.1	UW4 Warnowwerft	1994-11-08 14:01:00	62.8	UW4 Warnowwerft	1994-10-17 16:25:00	2.07	UW4 Warnowwerft	1999-05-03 17:31:00	10.2	1.3	DB2 Sundische Wiese	2003-04-10 09:48:00	35.8	DB2 Sundische Wiese	2003-04-10 09:48:00	1	DB2 Sundische Wiese	2003-08-18 10:40:00	31.9	0.7	KB90 Fahrwasser I.Libitz w.	1998-10-06 14:30:00	44.7	KB90 Fahrwasser I.Libitz w.	1998-10-06 14:30:00	1.18	KB90 Fahrwasser I.Libitz w.	1998-05-12 14:25:00	10.3	1.1
WB3 Walfisch n.	1997-02-26 13:31:00	43.3	WB3 Walfisch n.	1997-02-26 13:31:00	1.05	WB3 Walfisch n.	2000-10-17 16:15:00	8.7	3.5	SH2 Tessmannsdorf nw.	2007-04-18 10:39:00	25.34	SH2 Tessmannsdorf nw.	2007-02-07 12:28:00	1.58	SH2 Tessmannsdorf nw.	2007-03-21 09:50:00	3.5	3.1	UW4 Warnowwerft	1994-12-05 16:20:00	81	UW4 Warnowwerft	1994-11-08 14:01:00	4.09	UW4 Warnowwerft	1999-06-14 16:15:00	8.9	2.8	DB2 Sundische Wiese	2003-05-19 10:20:00	44	DB2 Sundische Wiese	2003-05-19 10:20:00	0.93	DB2 Sundische Wiese	2003-09-15 10:45:00	26.5	1	KB90 Fahrwasser I.Libitz w.	1998-10-29 11:55:00	33.3	KB90 Fahrwasser I.Libitz w.	1998-10-29 11:55:00	1.13	KB90 Fahrwasser I.Libitz w.	1998-05-13 08:56:00	6.9	1.7
WB3 Walfisch n.	1997-03-18 13:06:00	37.6	WB3 Walfisch n.	1997-03-18 13:06:00	0.27	WB3 Walfisch n.	2000-11-14 16:03:00	0.6	6	SH2 Tessmannsdorf nw.	2007-05-22 08:00:00	25.72	SH2 Tessmannsdorf nw.	2007-03-21 09:50:00	1.18	SH2 Tessmannsdorf nw.	2007-04-18 10:39:00	1.4	4.9	UW4 Warnowwerft	1995-02-13 16:02:00	228	UW4 Warnowwerft	1994-12-05 16:20:00	1.97	UW4 Warnowwerft	1999-07-05 18:05:00	24.7	1.1	DB2 Sundische Wiese	2003-07-14 16:50:00	63.5	DB2 Sundische Wiese	2003-06-16 10:30:00	2.23	DB2 Sundische Wiese	2003-10-13 10:20:00	22.6	1	KB90 Fahrwasser I.Libitz w.	1998-11-04 13:44:00	46.6	KB90 Fahrwasser I.Libitz w.	1998-11-04 13:44:00	2.75	KB90 Fahrwasser I.Libitz w.	1998-06-03 13:15:00	17.3	0.9
WB3 Walfisch n.	1997-04-22 13:36:00	27.2	WB3 Walfisch n.	1997-04-22 13:36:00	0.17	WB3 Walfisch n.	2000-12-12 16:03:00	1.3	5.8	SH2 Tessmannsdorf nw.	2007-06-18 13:35:00	25.06	SH2 Tessmannsdorf nw.	2007-04-18 10:39:00	1	SH2 Tessmannsdorf nw.	2007-05-22 08:00:00	1.4	4.9	UW4 Warnowwerft	1995-04-18 14:34:00	122	UW4 Warnowwerft	1995-02-13 16:02:00	2.67	UW4 Warnowwerft	1999-08-17 16:50:00	3	2.1	DB2 Sundische Wiese	2003-08-18 10:40:00	86.5	DB2 Sundische Wiese	2003-07-14 16:50:00	2.56	DB2 Sundische Wiese	2003-11-10 10:30:00	4.2	1.7	KB90 Fahrwasser I.Libitz w.	1998-11-30 09:00:00	50.2	KB90 Fahrwasser I.Libitz w.	1998-11-30 09:00:00	1.3	KB90 Fahrwasser I.Libitz w.	1998-06-11 08:18:00	20.8	0.9
WB3 Walfisch n.	1997-05-13 13:56:00	21.9	WB3 Walfisch n.	1997-05-13 13:56:00	0.49	WB3 Walfisch n.	2001-01-09 15:25:00	0.6	5.8	SH2 Tessmannsdorf nw.	2007-07-23 10:40:00	48.17	SH2 Tessmannsdorf nw.	2007-05-22 08:00:00	0.84	SH2 Tessmannsdorf nw.	2007-06-18 13:35:00	6.6	4.7	UW4 Warnowwerft	1995-05-02 14:37:00	88.8	UW4 Warnowwerft	1995-04-18 14:34:00	1.64	UW4 Warnowwerft	1999-09-07 16:28:00	9.5	1.6	DB2 Sundische Wiese	2003-09-15 10:45:00	58.6	DB2 Sundische Wiese	2003-08-18 10:40:00	2.79	DB2 Sundische Wiese	2004-03-18 11:35:00	39.9	0.7	KB90 Fahrwasser I.Libitz w.	1999-01-11 09:15:00	48	KB90 Fahrwasser I.Libitz w.	1999-01-11 09:15:00	1.33	KB90 Fahrwasser I.Libitz w.	1998-07-06 08:20:00	4.6	1.5
WB3 Walfisch n.	1997-06-10 14:43:00	25.4	WB3 Walfisch n.	1997-06-10 14:43:00	0.81	WB3 Walfisch n.	2001-02-20 18:32:00	2.2		SH2 Tessmannsdorf nw.	2007-08-20 08:57:00	70.08	SH2 Tessmannsdorf nw.	2007-06-18 13:35:00	2.06	SH2 Tessmannsdorf nw.	2007-07-23 10:40:00	23	3.1	UW4 Warnowwerft	1995-06-26 15:47:00	59.9	UW4 Warnowwerft	1995-05-02 14:37:00	2.25	UW4 Warnowwerft	1999-10-18 16:04:00	4.5	2.4	DB2 Sundische Wiese	2003-10-13 10:20:00	54.4	DB2 Sundische Wiese	2003-09-15 10:45:00	1.49	DB2 Sundische Wiese	2004-04-15 11:27:00	21.6	0.6	KB90 Fahrwasser I.Libitz w.	1999-01-20 08:55:00	61.4	KB90 Fahrwasser I.Libitz w.	1999-01-20 08:55:00	1.02	KB90 Fahrwasser I.Libitz w.	1998-07-23 13:11:00	11.2	1.2
WB3 Walfisch n.	1997-07-22 17:03:00	36.8	WB3 Walfisch n.	1997-07-22 17:03:00	2.34	WB3 Walfisch n.	2001-03-06 16:35:00	2	5.9	SH2 Tessmannsdorf nw.	2007-09-03 09:43:00	46.92	SH2 Tessmannsdorf nw.	2007-07-23 10:40:00	2.38	SH2 Tessmannsdorf nw.	2007-08-20 08:57:00	33.9	3.7	UW4 Warnowwerft	1995-07-03 16:13:00	42	UW4 Warnowwerft	1995-06-26 15:47:00	2.67	UW4 Warnowwerft	1999-11-08 16:09:00	1.7	6	DB2 Sundische Wiese	2003-11-10 10:30:00	31.7	DB2 Sundische Wiese	2003-10-13 10:20:00	2.76	DB2 Sundische Wiese	2004-05-06 07:50:00	64.5	0.5	KB90 Fahrwasser I.Libitz w.	1999-01-28 08:30:00	78.6	KB90 Fahrwasser I.Libitz w.	1999-01-28 08:30:00	1.22	KB90 Fahrwasser I.Libitz w.	1998-07-30 08:25:00	13.6	1.2
WB3 Walfisch n.	1997-08-19 17:20:00	27.8	WB3 Walfisch n.	1997-08-19 17:20:00	2.24	WB3 Walfisch n.	2001-04-18 15:09:00	2.9	5.1	SH2 Tessmannsdorf nw.	2007-10-11 08:02:00	30.22	SH2 Tessmannsdorf nw.	2007-08-20 08:57:00	2.06	SH2 Tessmannsdorf nw.	2007-09-03 09:43:00	35.2	2.1	UW4 Warnowwerft	1995-08-01 16:06:00	48.3	UW4 Warnowwerft	1995-07-03 16:13:00	3.94	UW4 Warnowwerft	2000-01-10 16:42:00	1.9	2.8	DB2 Sundische Wiese	2004-03-18 11:35:00	105	DB2 Sundische Wiese	2003-11-10 10:30:00	1.15	DB2 Sundische Wiese	2004-06-17 12:20:00	42.6	0.6	KB90 Fahrwasser I.Libitz w.	1999-02-03 09:23:00	84	KB90 Fahrwasser I.Libitz w.	1999-02-03 09:23:00	1.51	KB90 Fahrwasser I.Libitz w.	1998-08-06 07:52:00	7.9	1.3
WB3 Walfisch n.	1997-11-11 14:02:00	25.4	WB3 Walfisch n.	1997-11-11 14:02:00	0.65	WB3 Walfisch n.	2001-04-25 14:07:00	2.2	5.7	SH2 Tessmannsdorf nw.	2007-11-14 10:56:00	36.84	SH2 Tessmannsdorf nw.	2007-09-03 09:43:00	1.63	SH2 Tessmannsdorf nw.	2007-10-11 08:02:00	2.5	4.1	UW4 Warnowwerft	1995-10-23 16:11:00	55.3	UW4 Warnowwerft	1995-08-01 16:06:00	4.53	UW4 Warnowwerft	2000-02-21 16:15:00	2.5	1.2	DB2 Sundische Wiese	2004-04-15 11:27:00	70	DB2 Sundische Wiese	2004-03-18 11:35:00	2.07	DB2 Sundische Wiese	2004-07-14 09:00:00	42.1	0.5	KB90 Fahrwasser I.Libitz w.	1999-02-10 14:37:00	38.8	KB90 Fahrwasser I.Libitz w.	1999-02-10 14:37:00	0.77	KB90 Fahrwasser I.Libitz w.	1998-08-18 14:01:00	14.7	1.5
WB3 Walfisch n.	1998-01-20 12:55:00	44.3	WB3 Walfisch n.	1998-01-20 12:55:00	0.97	WB3 Walfisch n.	2001-05-15 14:40:00	2.8	4.5	SH2 Tessmannsdorf nw.	2008-01-16 09:01:00	110.71	SH2 Tessmannsdorf nw.	2007-10-11 08:02:00	0.97	SH2 Tessmannsdorf nw.	2007-11-14 10:56:00	1.5	4	UW4 Warnowwerft	1995-11-13 15:39:00	65.6	UW4 Warnowwerft	1995-10-23 16:11:00	2.67	UW4 Warnowwerft	2000-03-19 16:21:00	3.3	1.9	DB2 Sundische Wiese	2004-05-06 07:50:00	78.7	DB2 Sundische Wiese	2004-04-15 11:27:00	1.86	DB2 Sundische Wiese	2004-08-24 08:40:00	34	0.6	KB90 Fahrwasser I.Libitz w.	1999-03-22 09:02:00	91.9	KB90 Fahrwasser I.Libitz w.	1999-03-22 09:02:00	0.83	KB90 Fahrwasser I.Libitz w.	1998-09-03 13:57:00	7.3	2.8
WB3 Walfisch n.	1998-02-11 10:30:00	44.9	WB3 Walfisch n.	1998-02-11 10:30:00	0.77	WB3 Walfisch n.	2001-06-26 14:40:00	2.7	5.2	SH2 Tessmannsdorf nw.	2008-02-04 10:31:00	149	SH2 Tessmannsdorf nw.	2007-11-14 10:56:00	0.96	SH2 Tessmannsdorf nw.	2007-12-05 10:10:00	1.3	4.1	UW4 Warnowwerft	1996-04-22 16:38:00	84.6	UW4 Warnowwerft	1995-11-13 15:39:00	3.27	UW4 Warnowwerft	2000-04-11 17:18:00	14.4	2.1	DB2 Sundische Wiese	2004-06-17 12:20:00	44.5	DB2 Sundische Wiese	2004-05-06 07:50:00	1.83	DB2 Sundische Wiese	2004-09-28 10:50:00	8.4	0.6	KB90 Fahrwasser I.Libitz w.	1999-04-19 10:30:00	71.7	KB90 Fahrwasser I.Libitz w.	1999-04-19 10:30:00	1.88	KB90 Fahrwasser I.Libitz w.	1998-09-23 09:46:00	15.4	1.5
WB3 Walfisch n.	1998-03-18 11:00:00	31.5	WB3 Walfisch n.	1998-03-18 11:00:00	0.5	WB3 Walfisch n.	2001-07-26 09:11:00	5.1	3.5	SH2 Tessmannsdorf nw.	2008-03-03 07:34:00	110.58	SH2 Tessmannsdorf nw.	2008-01-16 09:01:00	1.17	SH2 Tessmannsdorf nw.	2008-01-16 09:01:00	9.5	2.1	UW4 Warnowwerft	1996-05-13 15:56:00	41.3	UW4 Warnowwerft	1996-04-22 16:38:00	1.29	UW4 Warnowwerft	2000-05-02 16:20:00	12.7	2.3	DB2 Sundische Wiese	2004-07-14 09:00:00	68	DB2 Sundische Wiese	2004-06-17 12:20:00	3.94	DB2 Sundische Wiese	2004-10-20 10:00:00	36.3	0.7	KB90 Fahrwasser I.Libitz w.	1999-04-29 14:02:00	72	KB90 Fahrwasser I.Libitz w.	1999-04-29 14:02:00	1.97	KB90 Fahrwasser I.Libitz w.	1998-09-28 09:30:00	14.7	1.5
WB3 Walfisch n.	1998-04-15 10:00:00	26.1	WB3 Walfisch n.	1998-04-15 10:00:00	0.24	WB3 Walfisch n.	2001-08-02 15:51:00	5.1	2.5	SH2 Tessmannsdorf nw.	2008-04-21 09:55:00	76.9	SH2 Tessmannsdorf nw.	2008-02-04 10:31:00	1.43	SH2 Tessmannsdorf nw.	2008-02-04 10:31:00	4.5	3.1	UW4 Warnowwerft	1996-06-17 15:55:00	38.6	UW4 Warnowwerft	1996-05-13 15:56:00	0.86	UW4 Warnowwerft	2000-06-14 18:15:00	6.3	2.4	DB2 Sundische Wiese	2004-08-24 08:40:00	96.8	DB2 Sundische Wiese	2004-07-14 09:00:00	2.54	DB2 Sundische Wiese	2004-11-08 09:30:00	42.8	0.6	KB90 Fahrwasser I.Libitz w.	1999-05-03 09:23:00	48.7	KB90 Fahrwasser I.Libitz w.	1999-05-03 09:23:00	1.39	KB90 Fahrwasser I.Libitz w.	1998-10-06 14:30:00	13.5	1.5
WB3 Walfisch n.	1998-05-19 15:50:00	28.6	WB3 Walfisch n.	1998-05-19 15:50:00	0.78	WB3 Walfisch n.	2001-09-18 16:16:00	7	3.2	SH2 Tessmannsdorf nw.	2008-05-26 09:31:00	22.43	SH2 Tessmannsdorf nw.	2008-03-03 07:34:00	0.95	SH2 Tessmannsdorf nw.	2008-03-03 07:34:00	4.9	3.1	UW4 Warnowwerft	1996-07-08 14:06:00	39.3	UW4 Warnowwerft	1996-06-17 15:55:00	1.96	UW4 Warnowwerft	2000-07-24 18:50:00	4	3	DB2 Sundische Wiese	2004-09-28 10:50:00	78.4	DB2 Sundische Wiese	2004-08-24 08:40:00	2.74	DB2 Sundische Wiese	2004-12-02 08:55:00	23.5	1	KB90 Fahrwasser I.Libitz w.	1999-05-18 14:52:00	46.2	KB90 Fahrwasser I.Libitz w.	1999-05-18 14:52:00	1.52	KB90 Fahrwasser I.Libitz w.	1998-10-29 11:55:00	9.1	1.3
WB3 Walfisch n.	1998-06-09 12:55:00	27.2	WB3 Walfisch n.	1998-06-09 12:55:00	1.5	WB3 Walfisch n.	2001-10-10 08:52:00	1.6	5.4	SH2 Tessmannsdorf nw.	2008-06-16 07:59:00	34.59	SH2 Tessmannsdorf nw.	2008-04-21 09:55:00	0.51	SH2 Tessmannsdorf nw.	2008-04-21 09:55:00	2.1	4.1	UW4 Warnowwerft	1996-08-12 16:26:00	31.1	UW4 Warnowwerft	1996-07-08 14:06:00	2.35	UW4 Warnowwerft	2000-08-21 16:35:00	13.2	2.8	DB2 Sundische Wiese	2004-10-20 10:00:00	85.6	DB2 Sundische Wiese	2004-09-28 10:50:00	2.4	DB2 Sundische Wiese	2005-01-17 11:25:00	16	1	KB90 Fahrwasser I.Libitz w.	1999-05-27 08:44:00	56.3	KB90 Fahrwasser I.Libitz w.	1999-05-27 08:44:00	1.86	KB90 Fahrwasser I.Libitz w.	1998-11-04 13:44:00	12.5	1.8
WB3 Walfisch n.	1998-07-28 12:54:00	26	WB3 Walfisch n.	1998-07-28 12:54:00	1.44	WB3 Walfisch n.	2001-11-13 16:55:00	1.3	4.2	SH2 Tessmannsdorf nw.	2008-07-08 09:31:00	38.34	SH2 Tessmannsdorf nw.	2008-05-26 09:31:00	0.72	SH2 Tessmannsdorf nw.	2008-05-26 09:31:00	1.3	3.7	UW4 Warnowwerft	1996-09-23 16:26:00	21	UW4 Warnowwerft	1996-08-12 16:26:00	2	UW4 Warnowwerft	2000-09-25 16:15:00	3.5	4.5	DB2 Sundische Wiese	2004-11-08 09:30:00	107	DB2 Sundische Wiese	2004-10-20 10:00:00	2.03	DB2 Sundische Wiese	2005-02-21 10:00:00	25.8	0.7	KB90 Fahrwasser I.Libitz w.	1999-06-01 08:46:00	62.1	KB90 Fahrwasser I.Libitz w.	1999-06-01 08:46:00	2.65	KB90 Fahrwasser I.Libitz w.	1998-11-30 09:00:00	5.8	2.5
WB3 Walfisch n.	1998-08-11 15:47:00	47.9	WB3 Walfisch n.	1998-08-11 15:47:00	1.58	WB3 Walfisch n.	2001-12-04 15:01:00	0.9	7	SH2 Tessmannsdorf nw.	2008-08-27 07:38:00	24.96	SH2 Tessmannsdorf nw.	2008-06-16 07:59:00	2.09	SH2 Tessmannsdorf nw.	2008-06-16 07:59:00	1.8	4.9	UW4 Warnowwerft	1996-10-07 16:42:00	28.6	UW4 Warnowwerft	1996-09-23 16:26:00	2.65	UW4 Warnowwerft	2000-10-19 09:05:00	2.6	5.8	DB2 Sundische Wiese	2004-12-02 08:55:00	70.4	DB2 Sundische Wiese	2004-11-08 09:30:00	3.25	DB2 Sundische Wiese	2005-03-22 09:20:00	35.2	0.6	KB90 Fahrwasser I.Libitz w.	1999-06-14 08:55:00	71.3	KB90 Fahrwasser I.Libitz w.	1999-06-14 08:55:00	3.1	KB90 Fahrwasser I.Libitz w.	1999-01-11 09:15:00	3	2.5
WB3 Walfisch n.	1998-09-15 14:01:00	21.3	WB3 Walfisch n.	1998-09-15 14:01:00	1.01	WB3 Walfisch n.	2002-01-15 16:11:00	1.2	5	SH2 Tessmannsdorf nw.	2008-09-29 09:10:00	27.73	SH2 Tessmannsdorf nw.	2008-07-08 09:31:00	2.28	SH2 Tessmannsdorf nw.	2008-08-27 07:38:00	2	3.8	UW4 Warnowwerft	1996-11-25 16:01:00	90.9	UW4 Warnowwerft	1996-10-07 16:42:00	2.23	UW4 Warnowwerft	2000-11-16 08:25:00	2.6	3.5	DB2 Sundische Wiese	2005-01-17 11:25:00	33.3	DB2 Sundische Wiese	2004-12-02 08:55:00	2.77	DB2 Sundische Wiese	2005-04-26 08:15:00	49.8	0.5	KB90 Fahrwasser I.Libitz w.	1999-06-29 14:50:00	48	KB90 Fahrwasser I.Libitz w.	1999-06-29 14:50:00	1.96	KB90 Fahrwasser I.Libitz w.	1999-01-20 08:55:00	5.5	2.1
WB3 Walfisch n.	1998-11-02 17:39:00	30.4	WB3 Walfisch n.	1998-11-02 17:39:00	0.95	WB3 Walfisch n.	2002-03-19 08:52:00	1.1	6	SH2 Tessmannsdorf nw.	2008-10-22 09:17:00	21.17	SH2 Tessmannsdorf nw.	2008-08-27 07:38:00	1.34	SH2 Tessmannsdorf nw.	2008-09-29 09:10:00	2.7	4.7	UW4 Warnowwerft	1996-12-16 16:03:00	73.6	UW4 Warnowwerft	1996-11-25 16:01:00	2.38	UW4 Warnowwerft	2000-12-14 09:03:00	2.2	2.8	DB2 Sundische Wiese	2005-02-21 10:00:00	58.2	DB2 Sundische Wiese	2005-01-17 11:25:00	1.38	DB2 Sundische Wiese	2005-05-18 08:20:00	41.9	0.5	KB90 Fahrwasser I.Libitz w.	1999-07-08 08:30:00	49.4	KB90 Fahrwasser I.Libitz w.	1999-07-08 08:30:00	1.65	KB90 Fahrwasser I.Libitz w.	1999-01-28 08:30:00	10.5	1.6
WB3 Walfisch n.	1998-12-10 13:45:00	17.7	WB3 Walfisch n.	1998-12-10 13:45:00	0.8	WB3 Walfisch n.	2002-04-03 14:21:00	3.1	5.5	SH2 Tessmannsdorf nw.	2008-11-12 09:41:00	29.83	SH2 Tessmannsdorf nw.	2008-09-29 09:10:00	1.16	SH2 Tessmannsdorf nw.	2008-10-22 09:17:00	1.1	4.9	UW4 Warnowwerft	1997-02-24 15:50:00	142	UW4 Warnowwerft	1996-12-16 16:03:00	1.55	UW4 Warnowwerft	2001-01-11 09:21:00	0.8	5	DB2 Sundische Wiese	2005-03-22 09:20:00	143	DB2 Sundische Wiese	2005-02-21 10:00:00	1.98	DB2 Sundische Wiese	2005-06-20 08:48:00	21.3	0.5	KB90 Fahrwasser I.Libitz w.	1999-07-15 08:20:00	62	KB90 Fahrwasser I.Libitz w.	1999-07-15 08:20:00	3.4	KB90 Fahrwasser I.Libitz w.	1999-02-03 09:23:00	9	1.3
WB3 Walfisch n.	1999-01-12 14:22:00	34.3	WB3 Walfisch n.	1999-01-12 14:22:00	0.97	WB3 Walfisch n.	2002-05-07 14:30:00	3.4	4.4	SH2 Tessmannsdorf nw.	2009-02-17 10:31:00	67.58	SH2 Tessmannsdorf nw.	2008-10-22 09:17:00	0.58	SH2 Tessmannsdorf nw.	2008-11-12 09:41:00	3.3	2.1	UW4 Warnowwerft	1997-03-17 16:40:00	98.1	UW4 Warnowwerft	1997-02-24 15:50:00	1.07	UW4 Warnowwerft	2001-02-20 09:32:00	1.4	3.4	DB2 Sundische Wiese	2005-04-26 08:15:00	112	DB2 Sundische Wiese	2005-03-22 09:20:00	2.98	DB2 Sundische Wiese	2005-07-25 10:25:00	9.4	0.6	KB90 Fahrwasser I.Libitz w.	1999-08-10 15:06:00	66.8	KB90 Fahrwasser I.Libitz w.	1999-08-10 15:06:00	3.16	KB90 Fahrwasser I.Libitz w.	1999-02-10 14:37:00	3.3	1.6
WB3 Walfisch n.	1999-02-23 15:15:00	56.4	WB3 Walfisch n.	1999-02-23 15:15:00	0.72	WB3 Walfisch n.	2002-06-04 16:20:00	5.7	2.8	SH2 Tessmannsdorf nw.	2009-03-25 09:33:00	104.12	SH2 Tessmannsdorf nw.	2008-11-12 09:41:00	0.96	SH2 Tessmannsdorf nw.	2009-02-17 10:31:00	1.8	4.7	UW4 Warnowwerft	1997-04-21 16:05:00	89.6	UW4 Warnowwerft	1997-03-17 16:40:00	0.96	UW4 Warnowwerft	2001-03-08 08:45:00	1.8	3.4	DB2 Sundische Wiese	2005-05-18 08:20:00	90.9	DB2 Sundische Wiese	2005-04-26 08:15:00	3.28	DB2 Sundische Wiese	2005-08-22 09:23:00	21.9	1	KB90 Fahrwasser I.Libitz w.	1999-08-16 09:18:00	40.4	KB90 Fahrwasser I.Libitz w.	1999-08-16 09:18:00	1.31	KB90 Fahrwasser I.Libitz w.	1999-03-22 09:02:00	11.8	1.6
WB3 Walfisch n.	1999-03-09 15:30:00	74.7	WB3 Walfisch n.	1999-03-09 15:30:00	0.72	WB3 Walfisch n.	2002-07-16 09:10:00	3.1	3.8	SH2 Tessmannsdorf nw.	2009-04-27 09:28:00	33.51	SH2 Tessmannsdorf nw.	2009-02-17 10:31:00	0.46	SH2 Tessmannsdorf nw.	2009-03-25 09:33:00	2.5	4.1	UW4 Warnowwerft	1997-05-12 16:48:00	69.5	UW4 Warnowwerft	1997-04-21 16:05:00	0.93	UW4 Warnowwerft	2001-04-17 16:00:00	3.7	3.2	DB2 Sundische Wiese	2005-06-20 08:48:00	80.2	DB2 Sundische Wiese	2005-05-18 08:20:00	1.43	DB2 Sundische Wiese	2005-09-19 08:45:00	32.5	0.9	KB90 Fahrwasser I.Libitz w.	1999-08-30 08:24:00	41.6	KB90 Fahrwasser I.Libitz w.	1999-08-30 08:24:00	1.68	KB90 Fahrwasser I.Libitz w.	1999-04-19 10:30:00	11.4	0.6
WB3 Walfisch n.	1999-05-05 10:56:00	24.7	WB3 Walfisch n.	1999-05-05 10:56:00	0.19	WB3 Walfisch n.	2002-08-15 17:20:00	3.5	2.6	SH2 Tessmannsdorf nw.	2009-05-18 11:01:00	28.75	SH2 Tessmannsdorf nw.	2009-03-25 09:33:00	0.51	SH2 Tessmannsdorf nw.	2009-04-27 09:28:00	12.2	3.5	UW4 Warnowwerft	1997-06-09 16:26:00	46.7	UW4 Warnowwerft	1997-05-12 16:48:00	1.78	UW4 Warnowwerft	2001-05-14 16:37:00	8.4	2.4	DB2 Sundische Wiese	2005-07-25 10:25:00	99.7	DB2 Sundische Wiese	2005-06-20 08:48:00	1.46	DB2 Sundische Wiese	2005-10-10 08:37:00	28.7	1	KB90 Fahrwasser I.Libitz w.	1999-09-02 15:30:00	57	KB90 Fahrwasser I.Libitz w.	1999-09-02 15:30:00	1.63	KB90 Fahrwasser I.Libitz w.	1999-04-29 14:02:00	12.7	0.6
WB3 Walfisch n.	1999-06-15 14:43:00	29.4	WB3 Walfisch n.	1999-06-15 14:43:00	1.9	WB3 Walfisch n.	2002-09-10 16:00:00	7	3.5	SH2 Tessmannsdorf nw.	2009-06-18 10:33:00	23.76	SH2 Tessmannsdorf nw.	2009-04-27 09:28:00	0.74	SH2 Tessmannsdorf nw.	2009-05-18 11:01:00	1.5	4.9	UW4 Warnowwerft	1997-07-21 16:18:00	45.1	UW4 Warnowwerft	1997-06-09 16:26:00	1.36	UW4 Warnowwerft	2001-06-25 17:36:00	7.4	2.3	DB2 Sundische Wiese	2005-08-22 09:23:00	53.3	DB2 Sundische Wiese	2005-07-25 10:25:00	2.05	DB2 Sundische Wiese	2005-11-07 08:55:00	36.1	0.8	KB90 Fahrwasser I.Libitz w.	1999-09-30 08:25:00	57.8	KB90 Fahrwasser I.Libitz w.	1999-09-30 08:25:00	1.4	KB90 Fahrwasser I.Libitz w.	1999-05-03 09:23:00	12.9	1.1
WB3 Walfisch n.	1999-07-06 16:18:00	34.3	WB3 Walfisch n.	1999-07-06 16:18:00	1.34	WB3 Walfisch n.	2002-10-08 10:02:00	4.1	3.4	SH2 Tessmannsdorf nw.	2009-07-13 06:37:00	36.17	SH2 Tessmannsdorf nw.	2009-05-18 11:01:00	0.61	SH2 Tessmannsdorf nw.	2009-06-18 10:33:00	1	4.7	UW4 Warnowwerft	1997-08-18 16:37:00	44.6	UW4 Warnowwerft	1997-07-21 16:18:00	2.74	UW4 Warnowwerft	2001-07-09 17:20:00	3.4	4.6	DB2 Sundische Wiese	2005-09-19 08:45:00	54.7	DB2 Sundische Wiese	2005-08-22 09:23:00	3.14	DB2 Sundische Wiese	2006-03-30 08:55:00	22.9	0.8	KB90 Fahrwasser I.Libitz w.	1999-10-04 09:40:00	47.8	KB90 Fahrwasser I.Libitz w.	1999-10-04 09:40:00	1.34	KB90 Fahrwasser I.Libitz w.	1999-05-18 14:52:00	17.7	1
WB3 Walfisch n.	1999-08-18 17:00:00	34.7	WB3 Walfisch n.	1999-08-18 17:00:00	2.02	WB3 Walfisch n.	2002-11-18 14:40:00	2.2	5.5	SH2 Tessmannsdorf nw.	2009-08-19 09:35:00	37.96	SH2 Tessmannsdorf nw.	2009-06-18 10:33:00	0.63	SH2 Tessmannsdorf nw.	2009-07-13 06:37:00	3.4	3.9	UW4 Warnowwerft	1997-10-23 13:25:00	29.4	UW4 Warnowwerft	1997-08-18 16:37:00	2.93	UW4 Warnowwerft	2001-08-01 15:46:00	4.2	2.5	DB2 Sundische Wiese	2005-10-10 08:37:00	64	DB2 Sundische Wiese	2005-09-19 08:45:00	1.14	DB2 Sundische Wiese	2006-04-19 14:33:00	22.4	0.5	KB90 Fahrwasser I.Libitz w.	1999-11-04 14:40:00	41.4	KB90 Fahrwasser I.Libitz w.	1999-11-04 14:40:00	1.03	KB90 Fahrwasser I.Libitz w.	1999-05-27 08:44:00	16.6	1
WB3 Walfisch n.	1999-09-08 15:30:00	25.6	WB3 Walfisch n.	1999-09-08 15:30:00	1.12	WB3 Walfisch n.	2002-12-09 15:20:00	1	4.4	SH2 Tessmannsdorf nw.	2009-09-16 09:32:00	32.1	SH2 Tessmannsdorf nw.	2009-07-13 06:37:00	3.39	SH2 Tessmannsdorf nw.	2009-08-19 09:35:00	2.4	4.9	UW4 Warnowwerft	1997-11-10 15:53:00	57	UW4 Warnowwerft	1997-10-23 13:25:00	1.08	UW4 Warnowwerft	2001-09-17 16:48:00	49.9	1.4	DB2 Sundische Wiese	2005-11-07 08:55:00	73.8	DB2 Sundische Wiese	2005-10-10 08:37:00	2.99	DB2 Sundische Wiese	2006-05-11 08:25:00	69.4	0.3	KB90 Fahrwasser I.Libitz w.	1999-11-11 08:29:00	48.2	KB90 Fahrwasser I.Libitz w.	1999-11-11 08:29:00	0.81	KB90 Fahrwasser I.Libitz w.	1999-06-01 08:46:00	23.2	0.8
WB3 Walfisch n.	1999-10-19 16:30:00	25.4	WB3 Walfisch n.	1999-10-19 16:30:00	1.33	WB3 Walfisch n.	2003-03-18 08:44:00	0.7	6	SH2 Tessmannsdorf nw.	2009-10-21 10:48:00	15.06	SH2 Tessmannsdorf nw.	2009-08-19 09:35:00	3.46	SH2 Tessmannsdorf nw.	2009-09-16 09:32:00	2.9	4.9	UW4 Warnowwerft	1998-01-19 15:50:00	269	UW4 Warnowwerft	1997-11-10 15:53:00	1.18	UW4 Warnowwerft	2001-10-09 09:00:00	8.5	1.4	DB2 Sundische Wiese	2006-03-30 08:55:00	149	DB2 Sundische Wiese	2005-11-07 08:55:00	2.16	DB2 Sundische Wiese	2006-06-12 09:20:00	31.8	0.4	KB90 Fahrwasser I.Libitz w.	1999-12-09 08:40:00	42.1	KB90 Fahrwasser I.Libitz w.	1999-12-09 08:40:00	1.16	KB90 Fahrwasser I.Libitz w.	1999-06-14 08:55:00	23.3	0.8
WB3 Walfisch n.	1999-11-09 14:42:00	22.1	WB3 Walfisch n.	1999-11-09 14:42:00	0.83	WB3 Walfisch n.	2003-04-29 16:52:00	1.8	3.5	SH2 Tessmannsdorf nw.	2009-11-11 10:50:00	25.51	SH2 Tessmannsdorf nw.	2009-09-16 09:32:00	1.59	SH2 Tessmannsdorf nw.	2009-10-21 10:48:00	1	4.9	UW4 Warnowwerft	1998-02-12 10:30:00	127	UW4 Warnowwerft	1998-01-19 15:50:00	1.57	UW4 Warnowwerft	2001-11-14 14:06:00	2.7	2.5	DB2 Sundische Wiese	2006-04-19 14:33:00	169	DB2 Sundische Wiese	2006-03-30 08:55:00	2.45	DB2 Sundische Wiese	2006-07-05 08:09:00	28.9	0.6	KB90 Fahrwasser I.Libitz w.	2000-01-04 14:32:00	57.4	KB90 Fahrwasser I.Libitz w.	2000-01-04 14:32:00	1.02	KB90 Fahrwasser I.Libitz w.	1999-06-29 14:50:00	15.7	1.1
WB3 Walfisch n.	2000-01-11 14:12:00	45.9	WB3 Walfisch n.	2000-01-11 14:12:00	1.02	WB3 Walfisch n.	2003-05-14 17:02:00	2.6	3	SH2 Tessmannsdorf nw.	2009-12-15 09:35:00	76.87	SH2 Tessmannsdorf nw.	2009-10-21 10:48:00	0.38	SH2 Tessmannsdorf nw.	2009-11-11 10:50:00	1.8	4.7	UW4 Warnowwerft	1998-03-16 12:15:00	172	UW4 Warnowwerft	1998-02-12 10:30:00	1.15	UW4 Warnowwerft	2001-12-06 09:45:00	0.8	4.6	DB2 Sundische Wiese	2006-05-11 08:25:00	117	DB2 Sundische Wiese	2006-04-19 14:33:00	3.88	DB2 Sundische Wiese	2006-08-07 11:02:00	33.6	0.8	KB90 Fahrwasser I.Libitz w.	2000-01-19 08:40:00	32.8	KB90 Fahrwasser I.Libitz w.	2000-01-19 08:40:00	1.69	KB90 Fahrwasser I.Libitz w.	1999-07-15 08:20:00	32.8	1
WB3 Walfisch n.	2000-02-22 15:05:00	47.6	WB3 Walfisch n.	2000-02-22 15:05:00	1.28	WB3 Walfisch n.	2003-06-12 09:34:00	12	2	SH2 Tessmannsdorf nw.	2010-04-14 09:31:00	133	SH2 Tessmannsdorf nw.	2009-11-11 10:50:00	0.52	SH2 Tessmannsdorf nw.	2010-03-23 09:40:00	9.7	2.3	UW4 Warnowwerft	1998-04-07 10:55:00	154	UW4 Warnowwerft	1998-03-16 12:15:00	1.21	UW4 Warnowwerft	2002-01-16 13:50:00	1.6	2.7	DB2 Sundische Wiese	2006-06-12 09:20:00	95.5	DB2 Sundische Wiese	2006-05-11 08:25:00	3.05	DB2 Sundische Wiese	2006-09-07 08:10:00	64.7	0.6	KB90 Fahrwasser I.Libitz w.	2000-02-07 14:05:00	43.8	KB90 Fahrwasser I.Libitz w.	2000-02-07 14:05:00	0.82	KB90 Fahrwasser I.Libitz w.	1999-08-10 15:06:00	26.7	0.9
WB3 Walfisch n.	2000-03-20 16:02:00	40.7	WB3 Walfisch n.	2000-03-20 16:02:00	1.66	WB3 Walfisch n.	2003-07-02 18:44:00	12.7	2	SH2 Tessmannsdorf nw.	2010-05-19 08:12:00	37.88	SH2 Tessmannsdorf nw.	2009-12-15 09:35:00	0.8	SH2 Tessmannsdorf nw.	2010-04-14 09:31:00	2.7	4.7	UW4 Warnowwerft	1998-05-05 15:32:00	82.6	UW4 Warnowwerft	1998-04-07 10:55:00	1.32	UW4 Warnowwerft	2002-02-26 11:22:00	7.1	1.6	DB2 Sundische Wiese	2006-07-05 08:09:00	87.1	DB2 Sundische Wiese	2006-06-12 09:20:00	3.02	DB2 Sundische Wiese	2006-10-25 08:42:00	43.5	0.8	KB90 Fahrwasser I.Libitz w.	2000-02-28 08:34:00	62	KB90 Fahrwasser I.Libitz w.	2000-02-28 08:34:00	0.95	KB90 Fahrwasser I.Libitz w.	1999-08-16 09:18:00	8.5	1.9
WB3 Walfisch n.	2000-04-12 15:20:00	22.7	WB3 Walfisch n.	2000-04-12 15:20:00	0.27	WB3 Walfisch n.	2003-08-12 18:10:00	11.7	1.6	SH2 Tessmannsdorf nw.	2010-06-16 08:55:00	33.26	SH2 Tessmannsdorf nw.	2010-03-23 09:40:00	1.55	SH2 Tessmannsdorf nw.	2010-05-19 08:12:00	4.1	4.1	UW4 Warnowwerft	1998-06-08 16:14:00	63	UW4 Warnowwerft	1998-05-05 15:32:00	1.04	UW4 Warnowwerft	2002-03-20 09:25:00	2.6	2	DB2 Sundische Wiese	2006-08-07 11:02:00	72.9	DB2 Sundische Wiese	2006-07-05 08:09:00	2.48	DB2 Sundische Wiese	2006-11-22 08:33:00	30.9	1	KB90 Fahrwasser I.Libitz w.	2000-03-08 11:35:00	51.5	KB90 Fahrwasser I.Libitz w.	2000-03-08 11:35:00	1.18	KB90 Fahrwasser I.Libitz w.	1999-08-30 08:24:00	9.1	1.5
WB3 Walfisch n.	2000-06-15 13:52:00	25	WB3 Walfisch n.	2000-06-15 13:52:00	1.02	WB3 Walfisch n.	2003-09-24 08:10:00	1.9	2.5	SH2 Tessmannsdorf nw.	2010-07-14 10:20:00	45.96	SH2 Tessmannsdorf nw.	2010-04-14 09:31:00	0.53	SH2 Tessmannsdorf nw.	2010-06-16 08:55:00	3	3.7	UW4 Warnowwerft	1998-07-27 15:50:00	59.2	UW4 Warnowwerft	1998-06-08 16:14:00	1.77	UW4 Warnowwerft	2002-04-02 16:26:00	12.2	1.7	DB2 Sundische Wiese	2006-09-07 08:10:00	91.1	DB2 Sundische Wiese	2006-08-07 11:02:00	1.35	DB2 Sundische Wiese	2006-12-12 10:10:00	30.6	0.8	KB90 Fahrwasser I.Libitz w.	2000-03-14 13:10:00	40.6	KB90 Fahrwasser I.Libitz w.	2000-03-14 13:10:00	0.77	KB90 Fahrwasser I.Libitz w.	1999-09-02 15:30:00	10.5	0.8
WB3 Walfisch n.	2000-07-25 16:25:00	22.3	WB3 Walfisch n.	2000-07-25 16:25:00	1.24	WB3 Walfisch n.	2004-01-08 09:10:00	0.9	7	SH2 Tessmannsdorf nw.	2010-08-18 10:29:00	97.96	SH2 Tessmannsdorf nw.	2010-05-19 08:12:00	0.82	SH2 Tessmannsdorf nw.	2010-07-14 10:20:00	4.3	2.1	UW4 Warnowwerft	1998-08-10 16:10:00	52.6	UW4 Warnowwerft	1998-07-27 15:50:00	2.75	UW4 Warnowwerft	2002-05-06 16:13:00	15.7	1.6	DB2 Sundische Wiese	2006-10-25 08:42:00	63.7	DB2 Sundische Wiese	2006-09-07 08:10:00	7.56	DB2 Sundische Wiese	2007-01-22 10:00:00	1.7	0.5	KB90 Fahrwasser I.Libitz w.	2000-04-06 14:08:00	35.1	KB90 Fahrwasser I.Libitz w.	2000-04-06 14:08:00	0.5	KB90 Fahrwasser I.Libitz w.	1999-09-30 08:25:00	17.6	1.1
WB3 Walfisch n.	2000-08-22 17:25:00	22.8	WB3 Walfisch n.	2000-08-22 17:25:00	1.37	WB3 Walfisch n.	2004-02-04 09:00:00	0.9	2.7	SH2 Tessmannsdorf nw.	2010-09-13 08:17:00	83.6	SH2 Tessmannsdorf nw.	2010-06-16 08:55:00	1.27	SH2 Tessmannsdorf nw.	2010-08-18 10:29:00	44.6	1.6	UW4 Warnowwerft	1998-09-14 16:50:00	21.9	UW4 Warnowwerft	1998-08-10 16:10:00	1.6	UW4 Warnowwerft	2002-06-03 16:45:00	49.3	1.2	DB2 Sundische Wiese	2006-11-22 08:33:00	45.3	DB2 Sundische Wiese	2006-10-25 08:42:00	1.64	DB2 Sundische Wiese	2007-02-07 08:45:00	20.7	1	KB90 Fahrwasser I.Libitz w.	2000-04-26 09:06:00	40	KB90 Fahrwasser I.Libitz w.	2000-04-26 09:06:00	0.85	KB90 Fahrwasser I.Libitz w.	1999-10-04 09:40:00	15.3	1.3
WB3 Walfisch n.	2000-09-26 16:12:00	21.1	WB3 Walfisch n.	2000-09-26 16:12:00	0.76	WB3 Walfisch n.	2004-03-03 14:30:00	3.8	5.2	SH2 Tessmannsdorf nw.	2010-10-19 07:35:00	34.282	SH2 Tessmannsdorf nw.	2010-07-14 10:20:00	3.91	SH2 Tessmannsdorf nw.	2010-09-13 08:17:00	43.5	2.1	UW4 Warnowwerft	1998-10-13 13:28:00	22.2	UW4 Warnowwerft	1998-09-14 16:50:00	0.43	UW4 Warnowwerft	2002-07-01 09:40:00	67.3	1.2	DB2 Sundische Wiese	2006-12-12 10:10:00	82.1	DB2 Sundische Wiese	2006-11-22 08:33:00	1.97	DB2 Sundische Wiese	2007-03-12 08:35:00	27.6	0.9	KB90 Fahrwasser I.Libitz w.	2000-05-11 14:56:00	38.3	KB90 Fahrwasser I.Libitz w.	2000-05-11 14:56:00	0.82	KB90 Fahrwasser I.Libitz w.	1999-11-04 14:40:00	9.4	2
WB3 Walfisch n.	2000-10-17 16:15:00	22.3	WB3 Walfisch n.	2000-10-17 16:15:00	0.94	WB3 Walfisch n.	2004-04-01 08:30:00	1.7	5	SH2 Tessmannsdorf nw.	2010-11-17 08:38:00	201.8	SH2 Tessmannsdorf nw.	2010-08-18 10:29:00	6.67	SH2 Tessmannsdorf nw.	2010-10-19 07:35:00	16	1.3	UW4 Warnowwerft	1998-11-03 15:12:00	138	UW4 Warnowwerft	1998-10-13 13:28:00	0.71	UW4 Warnowwerft	2002-08-06 08:55:00	28	1.3	DB2 Sundische Wiese	2007-01-22 10:00:00	94.51	DB2 Sundische Wiese	2006-12-12 10:10:00	1.91	DB2 Sundische Wiese	2007-04-12 09:12:00	33.7	0.45	KB90 Fahrwasser I.Libitz w.	2000-05-18 09:25:00	39.4	KB90 Fahrwasser I.Libitz w.	2000-05-18 09:25:00	1.15	KB90 Fahrwasser I.Libitz w.	1999-11-11 08:29:00	8.3	2
WB3 Walfisch n.	2000-11-14 16:03:00	22.2	WB3 Walfisch n.	2000-11-14 16:03:00	1.62	WB3 Walfisch n.	2004-05-18 16:30:00	2.4	3	SH2 Tessmannsdorf nw.	2011-03-24 09:31:00	93.536	SH2 Tessmannsdorf nw.	2010-09-13 08:17:00	2.99	SH2 Tessmannsdorf nw.	2010-11-17 08:38:00	4.2	3.8	UW4 Warnowwerft	1998-12-08 16:38:00	13.2	UW4 Warnowwerft	1998-11-03 15:12:00	2.44	UW4 Warnowwerft	2002-09-24 14:35:00	7.4	1.7	DB2 Sundische Wiese	2007-02-07 08:45:00	89.55	DB2 Sundische Wiese	2007-01-22 10:00:00	3.48	DB2 Sundische Wiese	2007-05-23 08:00:00	12.2	0.5	KB90 Fahrwasser I.Libitz w.	2000-06-05 13:18:00	45.7	KB90 Fahrwasser I.Libitz w.	2000-06-05 13:18:00	1.62	KB90 Fahrwasser I.Libitz w.	2000-01-04 14:32:00	6.5	1.8
WB3 Walfisch n.	2000-12-12 16:03:00	27.6	WB3 Walfisch n.	2000-12-12 16:03:00	1.36	WB3 Walfisch n.	2004-06-23 08:32:00	1.8	4	SH2 Tessmannsdorf nw.	2011-04-06 09:22:00	67.701	SH2 Tessmannsdorf nw.	2010-10-19 07:35:00	1.194	SH2 Tessmannsdorf nw.	2011-03-24 09:31:00	6.2	3.1	UW4 Warnowwerft	1999-01-11 15:05:00	143	UW4 Warnowwerft	1998-12-08 16:38:00	1.2	UW4 Warnowwerft	2002-10-21 15:00:00	9.4	2.8	DB2 Sundische Wiese	2007-03-12 08:35:00	187	DB2 Sundische Wiese	2007-02-07 08:45:00	1.14	DB2 Sundische Wiese	2007-06-21 08:30:00	28.6	0.5	KB90 Fahrwasser I.Libitz w.	2000-06-22 08:21:00	42.4	KB90 Fahrwasser I.Libitz w.	2000-06-22 08:21:00	1.51	KB90 Fahrwasser I.Libitz w.	2000-01-19 08:40:00	4.8	1.05
WB3 Walfisch n.	2001-01-09 15:25:00	64.6	WB3 Walfisch n.	2001-01-09 15:25:00	1.25	WB3 Walfisch n.	2004-07-21 08:10:00	7.1	2.8	SH2 Tessmannsdorf nw.	2011-05-25 08:23:00	34.201	SH2 Tessmannsdorf nw.	2010-11-17 08:38:00	0.982	SH2 Tessmannsdorf nw.	2011-04-06 09:22:00	4.1	4.1	UW4 Warnowwerft	1999-02-22 15:55:00	148	UW4 Warnowwerft	1999-01-11 15:05:00	1.53	UW4 Warnowwerft	2002-11-04 15:35:00	2.1	2	DB2 Sundische Wiese	2007-04-12 09:12:00	136	DB2 Sundische Wiese	2007-03-12 08:35:00	2.55	DB2 Sundische Wiese	2007-07-09 12:05:00	79	0.5	KB90 Fahrwasser I.Libitz w.	2000-07-27 08:26:00	30.9	KB90 Fahrwasser I.Libitz w.	2000-07-27 08:26:00	1.02	KB90 Fahrwasser I.Libitz w.	2000-02-07 14:05:00	2.3	1.6
WB3 Walfisch n.	2001-02-20 18:32:00	27.6	WB3 Walfisch n.	2001-02-20 18:32:00	1.03	WB3 Walfisch n.	2004-08-18 08:10:00	7.8	1.9	SH2 Tessmannsdorf nw.	2011-06-29 06:33:00	33.167	SH2 Tessmannsdorf nw.	2011-03-24 09:31:00	0.8	SH2 Tessmannsdorf nw.	2011-05-25 08:23:00	2.2	4.2	UW4 Warnowwerft	1999-03-08 15:45:00	238	UW4 Warnowwerft	1999-02-22 15:55:00	1.49	UW4 Warnowwerft	2002-12-19 15:00:00	1.5	2.8	DB2 Sundische Wiese	2007-05-23 08:00:00	76.95	DB2 Sundische Wiese	2007-04-12 09:12:00	1.89	DB2 Sundische Wiese	2007-08-13 12:05:00	45.5	0.5	KB90 Fahrwasser I.Libitz w.	2000-07-31 08:40:00	30.3	KB90 Fahrwasser I.Libitz w.	2000-07-31 08:40:00	0.93	KB90 Fahrwasser I.Libitz w.	2000-02-28 08:34:00	5.7	1.1
WB3 Walfisch n.	2001-03-06 16:35:00	31.1	WB3 Walfisch n.	2001-03-06 16:35:00	1.29	WB3 Walfisch n.	2004-09-16 15:10:00	3.6	3.5	SH2 Tessmannsdorf nw.	2011-07-13 10:35:00	44.283	SH2 Tessmannsdorf nw.	2011-04-06 09:22:00	0.505	SH2 Tessmannsdorf nw.	2011-06-29 06:33:00	2.6	3.9	UW4 Warnowwerft	1999-04-20 15:48:00	88.8	UW4 Warnowwerft	1999-03-08 15:45:00	1.68	UW4 Warnowwerft	2003-01-23 09:10:00	1.4	2.7	DB2 Sundische Wiese	2007-06-21 08:30:00	95.53	DB2 Sundische Wiese	2007-05-23 08:00:00	2.7	DB2 Sundische Wiese	2007-09-05 11:35:00	13.8	0.9	KB90 Fahrwasser I.Libitz w.	2000-08-09 14:10:00	26.1	KB90 Fahrwasser I.Libitz w.	2000-08-09 14:10:00	0.41	KB90 Fahrwasser I.Libitz w.	2000-03-08 11:35:00	9.9	1
WB3 Walfisch n.	2001-04-18 15:09:00	21.8	WB3 Walfisch n.	2001-04-18 15:09:00	0.41	WB3 Walfisch n.	2004-10-06 09:10:00	5.2	3.5	SH2 Tessmannsdorf nw.	2011-08-25 10:33:00	153.159	SH2 Tessmannsdorf nw.	2011-05-25 08:23:00	0.88	SH2 Tessmannsdorf nw.	2011-07-13 10:35:00	12.6	3.1	UW4 Warnowwerft	1999-05-03 17:31:00	43.4	UW4 Warnowwerft	1999-04-20 15:48:00	1.22	UW4 Warnowwerft	2003-03-05 15:00:00	2.9	4.1	DB2 Sundische Wiese	2007-07-09 12:05:00	42.02	DB2 Sundische Wiese	2007-06-21 08:30:00	3.84	DB2 Sundische Wiese	2007-10-11 08:30:00	29.8	0.8	KB90 Fahrwasser I.Libitz w.	2000-08-16 08:33:00	31.2	KB90 Fahrwasser I.Libitz w.	2000-08-16 08:33:00	0.49	KB90 Fahrwasser I.Libitz w.	2000-03-14 13:10:00	4.9	2.9
WB3 Walfisch n.	2001-04-25 14:07:00	26.5	WB3 Walfisch n.	2001-04-25 14:07:00	0.62	WB3 Walfisch n.	2004-12-01 08:55:00	2.7	4.5	SH2 Tessmannsdorf nw.	2011-09-21 07:31:00	147.269	SH2 Tessmannsdorf nw.	2011-06-29 06:33:00	0.782	SH2 Tessmannsdorf nw.	2011-08-25 10:33:00	7.9	2.7	UW4 Warnowwerft	1999-06-14 16:15:00	40.1	UW4 Warnowwerft	1999-05-03 17:31:00	0.76	UW4 Warnowwerft	2003-04-28 17:06:00	2.5	3.2	DB2 Sundische Wiese	2007-08-13 12:05:00	74.79	DB2 Sundische Wiese	2007-07-09 12:05:00	3.35	DB2 Sundische Wiese	2007-11-21 09:32:00	37.1	0.8	KB90 Fahrwasser I.Libitz w.	2000-09-07 12:20:00	25.1	KB90 Fahrwasser I.Libitz w.	2000-09-07 12:20:00	2.04	KB90 Fahrwasser I.Libitz w.	2000-04-06 14:08:00	6.6	1.4
WB3 Walfisch n.	2001-05-15 14:40:00	23.9	WB3 Walfisch n.	2001-05-15 14:40:00	0.81	WB3 Walfisch n.	2005-01-19 08:20:00	1.1	4.5	SH2 Tessmannsdorf nw.	2011-10-19 09:47:00	69.27	SH2 Tessmannsdorf nw.	2011-07-13 10:35:00	0.882	SH2 Tessmannsdorf nw.	2011-09-21 07:31:00	11.9	2.8	UW4 Warnowwerft	1999-07-05 18:05:00	47.9	UW4 Warnowwerft	1999-06-14 16:15:00	1.44	UW4 Warnowwerft	2003-05-13 17:30:00	4.2	2.7	DB2 Sundische Wiese	2007-09-05 11:35:00	83.87	DB2 Sundische Wiese	2007-08-13 12:05:00	2.34	DB2 Sundische Wiese	2007-12-04 09:35:00	41.4	0.5	KB90 Fahrwasser I.Libitz w.	2000-09-19 14:23:00	35.2	KB90 Fahrwasser I.Libitz w.	2000-09-19 14:23:00	0.97	KB90 Fahrwasser I.Libitz w.	2000-04-26 09:06:00	13.9	1.5
WB3 Walfisch n.	2001-06-26 14:40:00	24.4	WB3 Walfisch n.	2001-06-26 14:40:00	1.93	WB3 Walfisch n.	2005-02-02 08:30:00	0.8	4.5	SH2 Tessmannsdorf nw.	2011-11-17 11:35:00	35.839	SH2 Tessmannsdorf nw.	2011-08-25 10:33:00	1.66	SH2 Tessmannsdorf nw.	2011-10-19 09:47:00	12.9	2.7	UW4 Warnowwerft	1999-08-17 16:50:00	22.6	UW4 Warnowwerft	1999-07-05 18:05:00	2.49	UW4 Warnowwerft	2003-06-10 17:42:00	2.3	2	DB2 Sundische Wiese	2007-10-11 08:30:00	65.67	DB2 Sundische Wiese	2007-09-05 11:35:00	3.57	DB2 Sundische Wiese	2008-01-21 09:09:00	45.4	0.5	KB90 Fahrwasser I.Libitz w.	2000-10-16 09:00:00	34.7	KB90 Fahrwasser I.Libitz w.	2000-10-16 09:00:00	0.84	KB90 Fahrwasser I.Libitz w.	2000-05-11 14:56:00	13.1	1.2
WB3 Walfisch n.	2001-07-26 09:11:00	25.3	WB3 Walfisch n.	2001-07-26 09:11:00	1.26	WB3 Walfisch n.	2005-03-08 08:30:00	0.4	5.5	SH2 Tessmannsdorf nw.	2011-12-05 08:05:00	34.818	SH2 Tessmannsdorf nw.	2011-09-21 07:31:00	1.062	SH2 Tessmannsdorf nw.	2011-11-17 11:35:00	2.9	4.6	UW4 Warnowwerft	1999-09-07 16:28:00	26.8	UW4 Warnowwerft	1999-08-17 16:50:00	0.78	UW4 Warnowwerft	2003-07-01 17:11:00	12.2	1.9	DB2 Sundische Wiese	2007-11-21 09:32:00	61.06	DB2 Sundische Wiese	2007-10-11 08:30:00	9.87	DB2 Sundische Wiese	2008-02-14 09:22:00	14.5	0.9	KB90 Fahrwasser I.Libitz w.	2000-10-26 08:15:00	36.3	KB90 Fahrwasser I.Libitz w.	2000-10-26 08:15:00	0.1	KB90 Fahrwasser I.Libitz w.	2000-05-18 09:25:00	17.5	1.3
WB3 Walfisch n.	2001-08-02 15:51:00	28.3	WB3 Walfisch n.	2001-08-02 15:51:00	17.1	WB3 Walfisch n.	2005-04-06 08:15:00	2	5	SH2 Tessmannsdorf nw.	2012-01-18 08:31:00	122.19	SH2 Tessmannsdorf nw.	2011-10-19 09:47:00	0.966	SH2 Tessmannsdorf nw.	2011-12-05 08:05:00	9.8	2.1	UW4 Warnowwerft	1999-10-18 16:04:00	39.8	UW4 Warnowwerft	1999-09-07 16:28:00	1.41	UW4 Warnowwerft	2003-08-11 14:30:00	12.7	1.3	DB2 Sundische Wiese	2008-01-21 09:09:00	89.12	DB2 Sundische Wiese	2007-11-21 09:32:00	8.09	DB2 Sundische Wiese	2008-03-19 09:05:00	9.7	0.7	KB90 Fahrwasser I.Libitz w.	2000-11-16 14:10:00	36	KB90 Fahrwasser I.Libitz w.	2000-11-16 14:10:00	1.59	KB90 Fahrwasser I.Libitz w.	2000-06-05 13:18:00	10.3	1.3
WB3 Walfisch n.	2001-09-18 16:16:00	36.9	WB3 Walfisch n.	2001-09-18 16:16:00	1.49	WB3 Walfisch n.	2005-05-25 08:35:00	1.1	4	SH2 Tessmannsdorf nw.	2012-03-01 09:29:00	155.96	SH2 Tessmannsdorf nw.	2011-11-17 11:35:00	0.513	SH2 Tessmannsdorf nw.	2012-01-18 08:31:00	1.3	4	UW4 Warnowwerft	1999-11-08 16:09:00	34.1	UW4 Warnowwerft	1999-10-18 16:04:00	1.99	UW4 Warnowwerft	2003-09-22 18:21:00	8.4	3.1	DB2 Sundische Wiese	2008-02-14 09:22:00	73.45	DB2 Sundische Wiese	2008-01-21 09:09:00	1.95	DB2 Sundische Wiese	2008-04-10 08:15:00	43.4	0.5	KB90 Fahrwasser I.Libitz w.	2000-11-28 08:12:00	36.4	KB90 Fahrwasser I.Libitz w.	2000-11-28 08:12:00	0.32	KB90 Fahrwasser I.Libitz w.	2000-06-22 08:21:00	19.6	1.1
WB3 Walfisch n.	2001-10-10 08:52:00	41	WB3 Walfisch n.	2001-10-10 08:52:00	0.87	WB3 Walfisch n.	2005-06-14 08:07:00	3.1	4	SH2 Tessmannsdorf nw.	2012-03-22 10:33:00	117.24	SH2 Tessmannsdorf nw.	2011-12-05 08:05:00	0.788	SH2 Tessmannsdorf nw.	2012-03-01 09:29:00	6	3.4	UW4 Warnowwerft	2000-01-10 16:42:00	172	UW4 Warnowwerft	1999-11-08 16:09:00	1.38	UW4 Warnowwerft	2003-12-04 09:20:00	0.8	2.4	DB2 Sundische Wiese	2008-03-19 09:05:00	61.6	DB2 Sundische Wiese	2008-02-14 09:22:00	1.01	DB2 Sundische Wiese	2008-05-15 08:20:00	64.6	0.3	KB90 Fahrwasser I.Libitz w.	2000-12-14 13:39:00	37.2	KB90 Fahrwasser I.Libitz w.	2000-12-14 13:39:00	1.24	KB90 Fahrwasser I.Libitz w.	2000-07-27 08:26:00	10.5	1.9
WB3 Walfisch n.	2001-11-13 16:55:00	28.2	WB3 Walfisch n.	2001-11-13 16:55:00	1.19	WB3 Walfisch n.	2005-07-27 08:20:00	4.7	8.3	SH2 Tessmannsdorf nw.	2012-04-16 08:57:00	26.72	SH2 Tessmannsdorf nw.	2012-01-18 08:31:00	0.82	SH2 Tessmannsdorf nw.	2012-03-22 10:33:00	3.8	4.1	UW4 Warnowwerft	2000-02-21 16:15:00	156	UW4 Warnowwerft	2000-01-10 16:42:00	1.74	UW4 Warnowwerft	2004-01-06 15:15:00	1.2	3.3	DB2 Sundische Wiese	2008-04-10 08:15:00	76.32	DB2 Sundische Wiese	2008-03-19 09:05:00	1.5	DB2 Sundische Wiese	2008-06-17 07:45:00	15.8	0.4	KB90 Fahrwasser I.Libitz w.	2001-01-03 08:24:00	38.5	KB90 Fahrwasser I.Libitz w.	2001-01-03 08:24:00	2.66	KB90 Fahrwasser I.Libitz w.	2000-07-31 08:40:00	10.3	1.8
WB3 Walfisch n.	2001-12-04 15:01:00	27.4	WB3 Walfisch n.	2001-12-04 15:01:00	1.67	WB3 Walfisch n.	2005-08-10 08:51:00	2.7	3.5	SH2 Tessmannsdorf nw.	2012-05-10 08:49:00	26.28	SH2 Tessmannsdorf nw.	2012-03-01 09:29:00	0.98	SH2 Tessmannsdorf nw.	2012-04-16 08:57:00	1.7	4.7	UW4 Warnowwerft	2000-03-19 16:21:00	132	UW4 Warnowwerft	2000-02-21 16:15:00	2.3	UW4 Warnowwerft	2004-02-05 08:30:00	0.9	2.5	DB2 Sundische Wiese	2008-05-15 08:20:00	82.77	DB2 Sundische Wiese	2008-04-10 08:15:00	1.8	DB2 Sundische Wiese	2008-07-16 08:32:00	52.5	0.4	KB90 Fahrwasser I.Libitz w.	2001-01-25 12:20:00	38.2	KB90 Fahrwasser I.Libitz w.	2001-01-25 12:20:00	1.13	KB90 Fahrwasser I.Libitz w.	2000-08-09 14:10:00	5	2.7
WB3 Walfisch n.	2002-01-15 16:11:00	46.9	WB3 Walfisch n.	2002-01-15 16:11:00	1.06	WB3 Walfisch n.	2005-09-21 08:25:00	3.4	4	SH2 Tessmannsdorf nw.	2012-06-06 08:36:00	30.64	SH2 Tessmannsdorf nw.	2012-03-22 10:33:00	0.91	SH2 Tessmannsdorf nw.	2012-05-10 08:49:00	1.5	4.7	UW4 Warnowwerft	2000-04-11 17:18:00	151	UW4 Warnowwerft	2000-03-19 16:21:00	1.63	UW4 Warnowwerft	2004-03-11 10:45:00	6.9	2.6	DB2 Sundische Wiese	2008-06-17 07:45:00	87.63	DB2 Sundische Wiese	2008-05-15 08:20:00	2.33	DB2 Sundische Wiese	2008-08-11 13:05:00	64.8	0.5	KB90 Fahrwasser I.Libitz w.	2001-02-01 08:36:00	36.3	KB90 Fahrwasser I.Libitz w.	2001-02-01 08:36:00	0.97	KB90 Fahrwasser I.Libitz w.	2000-08-16 08:33:00	8.4	2
WB3 Walfisch n.	2002-04-03 14:21:00	24	WB3 Walfisch n.	2002-04-03 14:21:00	0.38	WB3 Walfisch n.	2005-10-12 08:23:00	5.9	2.5	SH2 Tessmannsdorf nw.	2012-07-02 08:42:00	43.76	SH2 Tessmannsdorf nw.	2012-04-16 08:57:00	0.47	SH2 Tessmannsdorf nw.	2012-06-06 08:36:00	1.1	4.7	UW4 Warnowwerft	2000-05-02 16:20:00	43	UW4 Warnowwerft	2000-04-11 17:18:00	1.31	UW4 Warnowwerft	2004-03-31 09:20:00	5.9	1.8	DB2 Sundische Wiese	2008-07-16 08:32:00	66.59	DB2 Sundische Wiese	2008-06-17 07:45:00	2.16	DB2 Sundische Wiese	2008-09-25 10:09:00	32.2	0.6	KB90 Fahrwasser I.Libitz w.	2001-02-26 15:12:00	29.6	KB90 Fahrwasser I.Libitz w.	2001-02-26 15:12:00	4.56	KB90 Fahrwasser I.Libitz w.	2000-09-07 12:20:00	4.2	2.9
WB3 Walfisch n.	2002-05-07 14:30:00	27.2	WB3 Walfisch n.	2002-05-07 14:30:00	0.7	WB3 Walfisch n.	2005-11-09 08:32:00	1.9	5	SH2 Tessmannsdorf nw.	2012-08-13 08:49:00	63.76	SH2 Tessmannsdorf nw.	2012-05-10 08:49:00	0.66	SH2 Tessmannsdorf nw.	2012-07-02 08:42:00	2.8	3.9	UW4 Warnowwerft	2000-06-14 18:15:00	30	UW4 Warnowwerft	2000-05-02 16:20:00	0.83	UW4 Warnowwerft	2004-05-17 17:35:00	7.1	2.5	DB2 Sundische Wiese	2008-08-11 13:05:00	48.61	DB2 Sundische Wiese	2008-07-16 08:32:00	1.88	DB2 Sundische Wiese	2008-10-15 09:15:00	21.1	0.8	KB90 Fahrwasser I.Libitz w.	2001-03-08 14:22:00	29.8	KB90 Fahrwasser I.Libitz w.	2001-03-08 14:22:00	1.12	KB90 Fahrwasser I.Libitz w.	2000-09-19 14:23:00	5.4	2
WB3 Walfisch n.	2002-06-04 16:20:00	26	WB3 Walfisch n.	2002-06-04 16:20:00	1.39	WB3 Walfisch n.	2006-01-11 09:15:00	0.4	5	SH2 Tessmannsdorf nw.	2012-09-03 08:09:00	64.39	SH2 Tessmannsdorf nw.	2012-06-06 08:36:00	1.12	SH2 Tessmannsdorf nw.	2012-08-13 08:49:00	14.4	3.8	UW4 Warnowwerft	2000-07-24 18:50:00	32.9	UW4 Warnowwerft	2000-06-14 18:15:00	1.63	UW4 Warnowwerft	2004-06-21 15:45:00	12.2	4.7	DB2 Sundische Wiese	2008-09-25 10:09:00	42.19	DB2 Sundische Wiese	2008-08-11 13:05:00	0.88	DB2 Sundische Wiese	2008-11-06 08:20:00	18.6	1.1	KB90 Fahrwasser I.Libitz w.	2001-04-19 14:01:00	58.9	KB90 Fahrwasser I.Libitz w.	2001-04-19 14:01:00	5.5	KB90 Fahrwasser I.Libitz w.	2000-10-16 09:00:00	9.2	2.5
WB3 Walfisch n.	2002-07-16 09:10:00	24.3	WB3 Walfisch n.	2002-07-16 09:10:00	1.31	WB3 Walfisch n.	2006-02-22 08:35:00	3.4	3	SH2 Tessmannsdorf nw.	2012-10-18 08:47:00	44.91	SH2 Tessmannsdorf nw.	2012-07-02 08:42:00	4.27	SH2 Tessmannsdorf nw.	2012-09-03 08:09:00	2.1	4.7	UW4 Warnowwerft	2000-08-21 16:35:00	42.4	UW4 Warnowwerft	2000-07-24 18:50:00	3.96	UW4 Warnowwerft	2004-07-20 09:35:00	5.4	2.3	DB2 Sundische Wiese	2008-10-15 09:15:00	29.03	DB2 Sundische Wiese	2008-09-25 10:09:00	1.88	DB2 Sundische Wiese	2009-02-24 10:50:00	17.8	0.5	KB90 Fahrwasser I.Libitz w.	2001-05-03 14:21:00	29.6	KB90 Fahrwasser I.Libitz w.	2001-05-03 14:21:00	0.9	KB90 Fahrwasser I.Libitz w.	2000-10-26 08:15:00	6.7	1.8
WB3 Walfisch n.	2002-08-15 17:20:00	26.9	WB3 Walfisch n.	2002-08-15 17:20:00	1.52	WB3 Walfisch n.	2006-03-15 14:43:00	5.6	4	SH2 Tessmannsdorf nw.	2012-11-05 09:07:00	39.22	SH2 Tessmannsdorf nw.	2012-08-13 08:49:00	4.15	SH2 Tessmannsdorf nw.	2012-10-18 08:47:00	2	3.4	UW4 Warnowwerft	2000-09-25 16:15:00	18.9	UW4 Warnowwerft	2000-08-21 16:35:00	2.51	UW4 Warnowwerft	2004-08-16 17:35:00	9.1	3	DB2 Sundische Wiese	2008-11-06 08:20:00	48.18	DB2 Sundische Wiese	2008-10-15 09:15:00	0.72	DB2 Sundische Wiese	2009-03-12 10:40:00	32.9	0.5	KB90 Fahrwasser I.Libitz w.	2001-05-14 08:53:00	37.5	KB90 Fahrwasser I.Libitz w.	2001-05-14 08:53:00	1.01	KB90 Fahrwasser I.Libitz w.	2000-11-16 14:10:00	3.1	2.8
WB3 Walfisch n.	2002-09-10 16:00:00	28.8	WB3 Walfisch n.	2002-09-10 16:00:00	1.96	WB3 Walfisch n.	2006-04-12 08:07:00	1.8	4.5	SH2 Tessmannsdorf nw.	2013-01-14 08:18:00	116.1	SH2 Tessmannsdorf nw.	2012-09-03 08:09:00	4.77	SH2 Tessmannsdorf nw.	2012-11-05 09:07:00	1.3	3.5	UW4 Warnowwerft	2000-10-19 09:05:00	25	UW4 Warnowwerft	2000-09-25 16:15:00	0.97	UW4 Warnowwerft	2004-09-14 16:30:00	3.5	2.5	DB2 Sundische Wiese	2009-02-24 10:50:00	103.47	DB2 Sundische Wiese	2008-11-06 08:20:00	1.22	DB2 Sundische Wiese	2009-04-14 10:56:00	89.6	0.5	KB90 Fahrwasser I.Libitz w.	2001-05-29 14:01:00	32.7	KB90 Fahrwasser I.Libitz w.	2001-05-29 14:01:00	1.47	KB90 Fahrwasser I.Libitz w.	2000-11-28 08:12:00	2.4	4.3
WB3 Walfisch n.	2002-10-08 10:02:00	33.4	WB3 Walfisch n.	2002-10-08 10:02:00	4.28	WB3 Walfisch n.	2006-08-23 11:05:00	14.9	2.5	SH2 Tessmannsdorf nw.	2013-02-20 08:23:00	168.15	SH2 Tessmannsdorf nw.	2012-10-18 08:47:00	1.45	SH2 Tessmannsdorf nw.	2013-01-14 08:18:00	2	4.3	UW4 Warnowwerft	2000-11-16 08:25:00	54.6	UW4 Warnowwerft	2000-10-19 09:05:00	1.07	UW4 Warnowwerft	2004-10-06 14:30:00	5.4	4.5	DB2 Sundische Wiese	2009-03-12 10:40:00	99.69	DB2 Sundische Wiese	2009-02-24 10:50:00	2.36	DB2 Sundische Wiese	2009-05-11 09:05:00	50.1	0.4	KB90 Fahrwasser I.Libitz w.	2001-06-21 10:43:00	30	KB90 Fahrwasser I.Libitz w.	2001-06-21 10:43:00	0.9	KB90 Fahrwasser I.Libitz w.	2000-12-14 13:39:00	8	1.3
WB3 Walfisch n.	2002-11-18 14:40:00	44.3	WB3 Walfisch n.	2002-11-18 14:40:00	4.79	WB3 Walfisch n.	2006-09-21 09:05:00	2.4	3.5	SH2 Tessmannsdorf nw.	2013-03-21 08:27:00	87.62	SH2 Tessmannsdorf nw.	2012-11-05 09:07:00	1.31	SH2 Tessmannsdorf nw.	2013-02-20 08:23:00	3.8	3.1	UW4 Warnowwerft	2000-12-14 09:03:00	72.3	UW4 Warnowwerft	2000-11-16 08:25:00	2.2	UW4 Warnowwerft	2004-11-30 09:40:00	1.5	3	DB2 Sundische Wiese	2009-04-14 10:56:00	100.4	DB2 Sundische Wiese	2009-03-12 10:40:00	1.88	DB2 Sundische Wiese	2009-06-08 08:25:00	37.1	0.5	KB90 Fahrwasser I.Libitz w.	2001-06-28 08:36:00	28.7	KB90 Fahrwasser I.Libitz w.	2001-06-28 08:36:00	1.06	KB90 Fahrwasser I.Libitz w.	2001-01-03 08:24:00	2.7	5
WB3 Walfisch n.	2002-12-09 15:20:00	58.9	WB3 Walfisch n.	2002-12-09 15:20:00	2.57	WB3 Walfisch n.	2006-10-19 09:12:00	4.5	3.7	SH2 Tessmannsdorf nw.	2013-04-22 10:05:00	106.38	SH2 Tessmannsdorf nw.	2013-01-14 08:18:00	1.13	SH2 Tessmannsdorf nw.	2013-03-21 08:27:00	2.1	3.6	UW4 Warnowwerft	2001-01-11 09:21:00	71.2	UW4 Warnowwerft	2000-12-14 09:03:00	2.17	UW4 Warnowwerft	2005-01-18 11:00:00	1.3	2	DB2 Sundische Wiese	2009-05-11 09:05:00	101.78	DB2 Sundische Wiese	2009-04-14 10:56:00	2.2	DB2 Sundische Wiese	2009-07-06 07:35:00	21.7	0.5	KB90 Fahrwasser I.Libitz w.	2001-07-04 14:30:00	31.5	KB90 Fahrwasser I.Libitz w.	2001-07-04 14:30:00	0.98	KB90 Fahrwasser I.Libitz w.	2001-01-25 12:20:00	2.9	2
WB3 Walfisch n.	2003-03-18 08:44:00	18.9	WB3 Walfisch n.	2003-03-18 08:44:00	0.23	WB3 Walfisch n.	2006-12-19 09:15:00	0.8	5	SH2 Tessmannsdorf nw.	2013-05-16 09:31:00	32.93	SH2 Tessmannsdorf nw.	2013-02-20 08:23:00	1.29	SH2 Tessmannsdorf nw.	2013-04-22 10:05:00	2.9	3.9	UW4 Warnowwerft	2001-02-20 09:32:00	108	UW4 Warnowwerft	2001-01-11 09:21:00	1.3	UW4 Warnowwerft	2005-02-01 11:00:00	1.2	2	DB2 Sundische Wiese	2009-06-08 08:25:00	100.31	DB2 Sundische Wiese	2009-05-11 09:05:00	2.04	DB2 Sundische Wiese	2009-08-04 11:00:00	21.2	0.6	KB90 Fahrwasser I.Libitz w.	2001-07-12 08:53:00	51.4	KB90 Fahrwasser I.Libitz w.	2001-07-12 08:53:00	1.09	KB90 Fahrwasser I.Libitz w.	2001-02-01 08:36:00	2.8	3.5
WB3 Walfisch n.	2003-04-29 16:52:00	18.7	WB3 Walfisch n.	2003-05-14 17:02:00	0.68	WB3 Walfisch n.	2007-02-07 09:08:00	0.6	5	SH2 Tessmannsdorf nw.	2013-06-17 07:41:00	29.48	SH2 Tessmannsdorf nw.	2013-03-21 08:27:00	0.62	SH2 Tessmannsdorf nw.	2013-06-17 07:41:00	2.3	3.7	UW4 Warnowwerft	2001-03-08 08:45:00	88.9	UW4 Warnowwerft	2001-02-20 09:32:00	1.6	UW4 Warnowwerft	2005-03-03 12:27:00	3	2.1	DB2 Sundische Wiese	2009-07-06 07:35:00	98.97	DB2 Sundische Wiese	2009-06-08 08:25:00	2.56	DB2 Sundische Wiese	2009-09-21 07:55:00	22.2	0.7	KB90 Fahrwasser I.Libitz w.	2001-08-07 14:36:00	41.1	KB90 Fahrwasser I.Libitz w.	2001-08-07 14:36:00	2.27	KB90 Fahrwasser I.Libitz w.	2001-02-26 15:12:00	4.4	2.8
WB3 Walfisch n.	2003-05-14 17:02:00	23.6	WB3 Walfisch n.	2003-06-12 09:34:00	0.59	WB3 Walfisch n.	2007-03-27 08:52:00	2.1	3.4	SH2 Tessmannsdorf nw.	2013-07-18 10:07:00	49.64	SH2 Tessmannsdorf nw.	2013-04-22 10:05:00	0.71	SH2 Tessmannsdorf nw.	2013-07-18 10:07:00	5.5	3.4	UW4 Warnowwerft	2001-04-17 16:00:00	75.2	UW4 Warnowwerft	2001-03-08 08:45:00	1.39	UW4 Warnowwerft	2005-04-05 09:55:00	3.4	2.5	DB2 Sundische Wiese	2009-08-04 11:00:00	79.97	DB2 Sundische Wiese	2009-07-06 07:35:00	2.6	DB2 Sundische Wiese	2009-10-05 10:00:00	34.4	0.4	KB90 Fahrwasser I.Libitz w.	2001-08-21 08:50:00	44.5	KB90 Fahrwasser I.Libitz w.	2001-08-21 08:50:00	2.26	KB90 Fahrwasser I.Libitz w.	2001-03-08 14:22:00	11.7	2.3
WB3 Walfisch n.	2003-06-12 09:34:00	24.6	WB3 Walfisch n.	2003-07-02 18:44:00	0.52	WB3 Walfisch n.	2007-06-20 11:45:00	2.8	2.7	SH2 Tessmannsdorf nw.	2013-08-19 08:23:00	77.67	SH2 Tessmannsdorf nw.	2013-05-16 09:31:00	0.74	SH2 Tessmannsdorf nw.	2013-08-19 08:23:00	31	3.3	UW4 Warnowwerft	2001-05-14 16:37:00	61.6	UW4 Warnowwerft	2001-04-17 16:00:00	1.64	UW4 Warnowwerft	2005-05-24 08:50:00	18.9	2.2	DB2 Sundische Wiese	2009-09-21 07:55:00	103.91	DB2 Sundische Wiese	2009-08-04 11:00:00	1.47	DB2 Sundische Wiese	2009-11-16 09:30:00	54	0.5	KB90 Fahrwasser I.Libitz w.	2001-09-12 17:01:00	28.7	KB90 Fahrwasser I.Libitz w.	2001-09-12 17:01:00	0.79	KB90 Fahrwasser I.Libitz w.	2001-04-19 14:01:00	7.4	1.8
WB3 Walfisch n.	2003-07-02 18:44:00	23.9	WB3 Walfisch n.	2003-08-12 18:10:00	1.96	WB3 Walfisch n.	2007-07-12 10:45:00	2.6	3.5	SH2 Tessmannsdorf nw.	2013-09-19 09:35:00	43.97	SH2 Tessmannsdorf nw.	2013-06-17 07:41:00	1.81	SH2 Tessmannsdorf nw.	2013-09-19 09:35:00	3.3	3.2	UW4 Warnowwerft	2001-06-25 17:36:00	26.3	UW4 Warnowwerft	2001-05-14 16:37:00	0.92	UW4 Warnowwerft	2005-06-13 11:47:00	26.9	1.1	DB2 Sundische Wiese	2009-10-05 10:00:00	100.07	DB2 Sundische Wiese	2009-09-21 07:55:00	0.62	DB2 Sundische Wiese	2009-12-10 09:22:00	37.3	0.6	KB90 Fahrwasser I.Libitz w.	2001-09-17 09:14:00	33.6	KB90 Fahrwasser I.Libitz w.	2001-09-17 09:14:00	0.98	KB90 Fahrwasser I.Libitz w.	2001-05-03 14:21:00	6.4	2
WB3 Walfisch n.	2003-08-12 18:10:00	25.9	WB3 Walfisch n.	2003-09-24 08:10:00	1.16	WB3 Walfisch n.	2007-08-28 09:07:00	2.2	3	SH2 Tessmannsdorf nw.	2013-10-09 09:32:00	33.52	SH2 Tessmannsdorf nw.	2013-07-18 10:07:00	3.31	SH2 Tessmannsdorf nw.	2013-10-09 09:32:00	1.9	4.1	UW4 Warnowwerft	2001-07-09 17:20:00	20	UW4 Warnowwerft	2001-06-25 17:36:00	1.54	UW4 Warnowwerft	2005-07-26 10:05:00	26.1	1.2	DB2 Sundische Wiese	2009-11-16 09:30:00	103.22	DB2 Sundische Wiese	2009-10-05 10:00:00	1.59	DB2 Sundische Wiese	2010-03-22 09:38:00	22.8	1	KB90 Fahrwasser I.Libitz w.	2001-10-01 08:27:00	37.1	KB90 Fahrwasser I.Libitz w.	2001-10-01 08:27:00	1.55	KB90 Fahrwasser I.Libitz w.	2001-05-14 08:53:00	5.6	1.9
WB3 Walfisch n.	2003-09-24 08:10:00	22.2	WB3 Walfisch n.	2004-01-08 09:10:00	0.75	WB3 Walfisch n.	2007-09-12 10:09:00	1.9	2.5	SH2 Tessmannsdorf nw.	2013-11-04 08:33:00	33.99	SH2 Tessmannsdorf nw.	2013-08-19 08:23:00	5.23	SH2 Tessmannsdorf nw.	2013-11-04 08:33:00	17.7	2.9	UW4 Warnowwerft	2001-08-01 15:46:00	24.1	UW4 Warnowwerft	2001-07-09 17:20:00	0.51	UW4 Warnowwerft	2005-08-09 09:29:00	20.2	1.4	DB2 Sundische Wiese	2009-12-10 09:22:00	96.87	DB2 Sundische Wiese	2009-11-16 09:30:00	2.1	DB2 Sundische Wiese	2010-04-26 09:20:00	82.5	0.3	KB90 Fahrwasser I.Libitz w.	2001-10-22 11:45:00	40	KB90 Fahrwasser I.Libitz w.	2001-10-22 11:45:00	1.73	KB90 Fahrwasser I.Libitz w.	2001-05-29 14:01:00	7.6	1.1
WB3 Walfisch n.	2004-01-08 09:10:00	18.1	WB3 Walfisch n.	2004-02-04 09:00:00	1.69	WB3 Walfisch n.	2007-10-10 10:14:00	3	2.8	SH2 Tessmannsdorf nw.	2013-12-04 09:23:00	57.7	SH2 Tessmannsdorf nw.	2013-09-19 09:35:00	1.83	SH2 Tessmannsdorf nw.	2013-12-04 09:23:00	3.2	3.1	UW4 Warnowwerft	2001-09-17 16:48:00	72.2	UW4 Warnowwerft	2001-08-01 15:46:00	1.26	UW4 Warnowwerft	2005-09-20 10:15:00	10.9	2	DB2 Sundische Wiese	2010-03-22 09:38:00	304	DB2 Sundische Wiese	2009-12-10 09:22:00	2.6	DB2 Sundische Wiese	2010-05-26 10:25:00	86.6	0.25	KB90 Fahrwasser I.Libitz w.	2001-11-12 11:10:00	28.2	KB90 Fahrwasser I.Libitz w.	2001-11-12 11:10:00	0.97	KB90 Fahrwasser I.Libitz w.	2001-06-21 10:43:00	3.9	2.3
WB3 Walfisch n.	2004-02-04 09:00:00	32.1	WB3 Walfisch n.	2004-03-03 14:30:00	1.78	WB3 Walfisch n.	2007-12-13 09:40:00	0.8	2.5	SH2 Tessmannsdorf nw.	2014-01-15 08:41:00	162.89	SH2 Tessmannsdorf nw.	2013-10-09 09:32:00	1.83	SH2 Tessmannsdorf nw.	2014-01-15 08:41:00	2.3		UW4 Warnowwerft	2001-10-09 09:00:00	149	UW4 Warnowwerft	2001-09-17 16:48:00	2.12	UW4 Warnowwerft	2005-10-11 09:20:00	3.8	4.5	DB2 Sundische Wiese	2010-04-26 09:20:00	138.58	DB2 Sundische Wiese	2010-03-22 09:38:00	2.68	DB2 Sundische Wiese	2010-06-24 08:25:00	38	0.4	KB90 Fahrwasser I.Libitz w.	2001-11-22 08:36:00	37	KB90 Fahrwasser I.Libitz w.	2001-11-22 08:36:00	1.25	KB90 Fahrwasser I.Libitz w.	2001-06-28 08:36:00	5.1	2
WB3 Walfisch n.	2004-03-03 14:30:00	32.7	WB3 Walfisch n.	2004-04-01 08:30:00	0.14	WB3 Walfisch n.	2008-01-17 09:15:00	0.3	6	SH2 Tessmannsdorf nw.	2014-02-26 08:23:00	93.31	SH2 Tessmannsdorf nw.	2013-11-04 08:33:00	1.14	SH2 Tessmannsdorf nw.	2014-02-26 08:23:00	0.6	2.8	UW4 Warnowwerft	2001-11-14 14:06:00	79.3	UW4 Warnowwerft	2001-10-09 09:00:00	3.56	UW4 Warnowwerft	2005-11-08 09:09:00	1.1	3.5	DB2 Sundische Wiese	2010-05-26 10:25:00	166	DB2 Sundische Wiese	2010-04-26 09:20:00	2.81	DB2 Sundische Wiese	2010-07-13 10:46:00	35.1	0.5	KB90 Fahrwasser I.Libitz w.	2001-12-03 08:59:00	43.6	KB90 Fahrwasser I.Libitz w.	2001-12-03 08:59:00	1.68	KB90 Fahrwasser I.Libitz w.	2001-07-04 14:30:00	7.7	1.5
WB3 Walfisch n.	2004-04-01 08:30:00	17.6	WB3 Walfisch n.	2004-05-18 16:30:00	1.56	WB3 Walfisch n.	2008-02-25 11:01:00	1.5	3.5	SH2 Tessmannsdorf nw.	2014-03-17 09:10:00	74.53	SH2 Tessmannsdorf nw.	2013-12-04 09:23:00	0.97	SH2 Tessmannsdorf nw.	2014-03-17 09:10:00	8.6	1.1	UW4 Warnowwerft	2001-12-06 09:45:00	23	UW4 Warnowwerft	2001-11-14 14:06:00	2.12	UW4 Warnowwerft	2006-01-10 09:30:00	2	3	DB2 Sundische Wiese	2010-06-24 08:25:00	102	DB2 Sundische Wiese	2010-05-26 10:25:00	3.62	DB2 Sundische Wiese	2010-08-16 11:40:00	34.9	0.7	KB90 Fahrwasser I.Libitz w.	2001-12-18 14:35:00	37.2	KB90 Fahrwasser I.Libitz w.	2001-12-18 14:35:00	0.95	KB90 Fahrwasser I.Libitz w.	2001-07-12 08:53:00	13.4	1.3
WB3 Walfisch n.	2004-05-18 16:30:00	14.4	WB3 Walfisch n.	2004-06-23 08:32:00	4.62	WB3 Walfisch n.	2008-03-03 09:48:00	2.2	2.2	SH2 Tessmannsdorf nw.	2014-04-24 10:35:00	28.21	SH2 Tessmannsdorf nw.	2014-01-15 08:41:00	1.13	SH2 Tessmannsdorf nw.	2014-04-24 10:35:00	2.7	2.3	UW4 Warnowwerft	2002-01-16 13:50:00	77.2	UW4 Warnowwerft	2001-12-06 09:45:00	2.17	UW4 Warnowwerft	2006-02-21 10:19:00	2.3	0.6	DB2 Sundische Wiese	2010-07-13 10:46:00	79.16	DB2 Sundische Wiese	2010-06-24 08:25:00	2.29	DB2 Sundische Wiese	2010-09-13 08:48:00	34.2	0.6	KB90 Fahrwasser I.Libitz w.	2002-01-14 09:05:00	59.2	KB90 Fahrwasser I.Libitz w.	2002-01-14 09:05:00	0.64	KB90 Fahrwasser I.Libitz w.	2001-08-07 14:36:00	11	1.3
WB3 Walfisch n.	2004-06-23 08:32:00	17.2	WB3 Walfisch n.	2004-07-21 08:10:00	0.61	WB3 Walfisch n.	2008-05-28 08:19:00	1.6	4.5	SH2 Tessmannsdorf nw.	2014-05-12 09:15:00	33.52	SH2 Tessmannsdorf nw.	2014-02-26 08:23:00	0.63	SH2 Tessmannsdorf nw.	2014-05-12 09:15:00	4.1	2.5	UW4 Warnowwerft	2002-02-26 11:22:00	226	UW4 Warnowwerft	2002-01-16 13:50:00	1.28	UW4 Warnowwerft	2006-03-16 13:26:00	1.3	3	DB2 Sundische Wiese	2010-08-16 11:40:00	67.75	DB2 Sundische Wiese	2010-07-13 10:46:00	2.21	DB2 Sundische Wiese	2010-10-11 09:05:00	63.1	0.5	KB90 Fahrwasser I.Libitz w.	2002-01-30 13:01:00	99.3	KB90 Fahrwasser I.Libitz w.	2002-01-30 13:01:00	1.76	KB90 Fahrwasser I.Libitz w.	2001-09-12 17:01:00	3.6	2.4
WB3 Walfisch n.	2004-07-21 08:10:00	86	WB3 Walfisch n.	2004-08-18 08:10:00	0.68	WB3 Walfisch n.	2008-07-09 08:29:00	10.4	2.2	SH2 Tessmannsdorf nw.	2014-06-04 08:35:00	32.79	SH2 Tessmannsdorf nw.	2014-03-17 09:10:00	1.06	SH2 Tessmannsdorf nw.	2014-06-04 08:35:00	4.6	3.2	UW4 Warnowwerft	2002-03-20 09:25:00	130	UW4 Warnowwerft	2002-02-26 11:22:00	1.94	UW4 Warnowwerft	2006-04-11 10:48:00	1.9	2	DB2 Sundische Wiese	2010-09-13 08:48:00	73.2	DB2 Sundische Wiese	2010-08-16 11:40:00	1.25	DB2 Sundische Wiese	2010-11-16 12:35:00	57.5	0.5	KB90 Fahrwasser I.Libitz w.	2002-02-25 09:16:00	37.6	KB90 Fahrwasser I.Libitz w.	2002-02-25 09:16:00	0.86	KB90 Fahrwasser I.Libitz w.	2001-09-17 09:14:00	6.6	3.2
WB3 Walfisch n.	2004-08-18 08:10:00	18	WB3 Walfisch n.	2004-09-16 15:10:00	1.18	WB3 Walfisch n.	2008-08-27 08:30:00	2.4	5	SH2 Tessmannsdorf nw.	2014-07-10 08:27:00	49.6	SH2 Tessmannsdorf nw.	2014-04-24 10:35:00	0.64	SH2 Tessmannsdorf nw.	2014-07-10 08:27:00	7.5	2.8	UW4 Warnowwerft	2002-04-02 16:26:00	186	UW4 Warnowwerft	2002-03-20 09:25:00	1.18	UW4 Warnowwerft	2006-07-26 09:30:00	4.9	2	DB2 Sundische Wiese	2010-10-11 09:05:00	75.14	DB2 Sundische Wiese	2010-09-13 08:48:00	1.52	DB2 Sundische Wiese	2011-02-09 11:10:00	54.6	0.25	KB90 Fahrwasser I.Libitz w.	2002-02-28 15:25:00	72	KB90 Fahrwasser I.Libitz w.	2002-02-28 15:25:00	1.31	KB90 Fahrwasser I.Libitz w.	2001-10-01 08:27:00	12.4	1.4
WB3 Walfisch n.	2004-09-16 15:10:00	28	WB3 Walfisch n.	2004-10-06 09:10:00	1.01	WB3 Walfisch n.	2009-01-21 08:30:00	0.4	6.5	SH2 Tessmannsdorf nw.	2014-08-18 06:57:00	61.77	SH2 Tessmannsdorf nw.	2014-05-12 09:15:00	0.9	SH2 Tessmannsdorf nw.	2014-08-18 06:57:00	11.5	1.8	UW4 Warnowwerft	2002-05-06 16:13:00	103	UW4 Warnowwerft	2002-04-02 16:26:00	2.18	UW4 Warnowwerft	2006-09-20 10:15:00	16.2	2.1	DB2 Sundische Wiese	2010-11-16 12:35:00	188.08	DB2 Sundische Wiese	2010-10-11 09:05:00	1.81	DB2 Sundische Wiese	2011-03-28 08:10:00	40.9	0.6	KB90 Fahrwasser I.Libitz w.	2002-03-06 12:20:00	125	KB90 Fahrwasser I.Libitz w.	2002-03-06 12:20:00	1.45	KB90 Fahrwasser I.Libitz w.	2001-10-22 11:45:00	16	1.6
WB3 Walfisch n.	2004-10-06 09:10:00	23.1	WB3 Walfisch n.	2004-12-01 08:55:00	1.05	WB3 Walfisch n.	2009-02-18 08:25:00	0.8	4.5	SH2 Tessmannsdorf nw.	2014-09-10 08:35:00	33.67	SH2 Tessmannsdorf nw.	2014-06-04 08:35:00	1.38	SH2 Tessmannsdorf nw.	2014-09-10 08:35:00	1.9	3.4	UW4 Warnowwerft	2002-06-03 16:45:00	87.1	UW4 Warnowwerft	2002-05-06 16:13:00	1.3	UW4 Warnowwerft	2006-10-17 09:36:00	8.7	3.1	DB2 Sundische Wiese	2011-02-09 11:10:00	324.262	DB2 Sundische Wiese	2010-11-16 12:35:00	2.446	DB2 Sundische Wiese	2011-04-26 11:55:00	42.4	0.5	KB90 Fahrwasser I.Libitz w.	2002-03-20 14:00:00	44.9	KB90 Fahrwasser I.Libitz w.	2002-03-20 14:00:00	1.2	KB90 Fahrwasser I.Libitz w.	2001-11-12 11:10:00	5.4	2
WB3 Walfisch n.	2004-12-01 08:55:00	31	WB3 Walfisch n.	2005-01-19 08:20:00	0.68	WB3 Walfisch n.	2009-04-22 08:30:00	1	4.5	SH2 Tessmannsdorf nw.	2014-10-22 09:02:00	37.34	SH2 Tessmannsdorf nw.	2014-07-10 08:27:00	2.21	SH2 Tessmannsdorf nw.	2014-10-22 09:02:00	6.5	4.1	UW4 Warnowwerft	2002-07-01 09:40:00	53.5	UW4 Warnowwerft	2002-06-03 16:45:00	2.28	UW4 Warnowwerft	2006-12-13 10:55:00	1.5	2.7	DB2 Sundische Wiese	2011-03-28 08:10:00	156.5	DB2 Sundische Wiese	2011-02-09 11:10:00	4.666	DB2 Sundische Wiese	2011-05-10 12:05:00	60.9	0.5	KB90 Fahrwasser I.Libitz w.	2002-04-02 08:40:00	47.9	KB90 Fahrwasser I.Libitz w.	2002-04-02 08:40:00	0.6	KB90 Fahrwasser I.Libitz w.	2001-11-22 08:36:00	14.7	0.8
WB3 Walfisch n.	2005-01-19 08:20:00	30.7	WB3 Walfisch n.	2005-02-02 08:30:00	0.7	WB3 Walfisch n.	2009-06-11 08:05:00	1.4	4.5	SH2 Tessmannsdorf nw.	2014-11-12 09:19:00	25.69	SH2 Tessmannsdorf nw.	2014-08-18 06:57:00	2.67	SH2 Tessmannsdorf nw.	2014-11-12 09:19:00	1.6	3.6	UW4 Warnowwerft	2002-08-06 08:55:00	50.9	UW4 Warnowwerft	2002-07-01 09:40:00	3.01	UW4 Warnowwerft	2007-02-06 10:05:00	11.8	1.6	DB2 Sundische Wiese	2011-04-26 11:55:00	96.611	DB2 Sundische Wiese	2011-03-28 08:10:00	2.198	DB2 Sundische Wiese	2011-06-14 11:10:00	28.3	1.2	KB90 Fahrwasser I.Libitz w.	2002-04-18 11:50:00	36	KB90 Fahrwasser I.Libitz w.	2002-04-18 11:50:00	0.36	KB90 Fahrwasser I.Libitz w.	2001-12-03 08:59:00	6.9	2
WB3 Walfisch n.	2005-02-02 08:30:00	27.7	WB3 Walfisch n.	2005-03-08 08:30:00	0.73	WB3 Walfisch n.	2009-07-15 08:15:00	8	1.8	SH2 Tessmannsdorf nw.	2014-12-11 11:15:00	55.37	SH2 Tessmannsdorf nw.	2014-09-10 08:35:00	1.1	SH2 Tessmannsdorf nw.	2014-12-11 11:15:00	21.5	0.5	UW4 Warnowwerft	2002-09-24 14:35:00	42.9	UW4 Warnowwerft	2002-08-06 08:55:00	2.82	UW4 Warnowwerft	2007-03-21 09:36:00	7	2	DB2 Sundische Wiese	2011-05-10 12:05:00	82.732	DB2 Sundische Wiese	2011-04-26 11:55:00	1.991	DB2 Sundische Wiese	2011-07-04 11:45:00	23.4	0.65	KB90 Fahrwasser I.Libitz w.	2002-05-06 09:16:00	38.9	KB90 Fahrwasser I.Libitz w.	2002-05-06 09:16:00	1.03	KB90 Fahrwasser I.Libitz w.	2001-12-18 14:35:00	4.4	2.8
WB3 Walfisch n.	2005-03-08 08:30:00	38.7	WB3 Walfisch n.	2005-04-06 08:15:00	0.27	WB3 Walfisch n.	2009-08-20 08:45:00	6	4	SH2 Tessmannsdorf nw.	2015-01-14 09:05:00	189.67	SH2 Tessmannsdorf nw.	2014-10-22 09:02:00	1.06	SH2 Tessmannsdorf nw.	2015-01-14 09:05:00	7	2.3	UW4 Warnowwerft	2002-10-21 15:00:00	56.8	UW4 Warnowwerft	2002-09-24 14:35:00	3.46	UW4 Warnowwerft	2007-04-17 09:50:00	3.6	2.1	DB2 Sundische Wiese	2011-06-14 11:10:00	90.569	DB2 Sundische Wiese	2011-05-10 12:05:00	2.221	DB2 Sundische Wiese	2011-08-02 11:45:00	62.9	0.4	KB90 Fahrwasser I.Libitz w.	2002-05-29 09:10:00	41.3	KB90 Fahrwasser I.Libitz w.	2002-05-29 09:10:00	1.08	KB90 Fahrwasser I.Libitz w.	2002-01-14 09:05:00	3.7	2.7
WB3 Walfisch n.	2005-04-06 08:15:00	28	WB3 Walfisch n.	2005-05-25 08:35:00	0.51	WB3 Walfisch n.	2009-09-17 08:45:00	5.1	3	SH2 Tessmannsdorf nw.	2015-02-11 09:52:00	27.29	SH2 Tessmannsdorf nw.	2014-11-12 09:19:00	0.77	SH2 Tessmannsdorf nw.	2015-02-11 09:52:00	7.2	2.7	UW4 Warnowwerft	2002-11-04 15:35:00	119	UW4 Warnowwerft	2002-10-21 15:00:00	1.91	UW4 Warnowwerft	2007-06-25 10:15:00	106.4	0.8	DB2 Sundische Wiese	2011-07-04 11:45:00	58.713	DB2 Sundische Wiese	2011-06-14 11:10:00	2.356	DB2 Sundische Wiese	2011-09-06 10:10:00	66.8	0.4	KB90 Fahrwasser I.Libitz w.	2002-06-03 09:36:00	42.2	KB90 Fahrwasser I.Libitz w.	2002-06-03 09:36:00	1.47	KB90 Fahrwasser I.Libitz w.	2002-01-30 13:01:00	7.9	0.6
WB3 Walfisch n.	2005-05-25 08:35:00	19.2	WB3 Walfisch n.	2005-06-14 08:07:00	0.88	WB3 Walfisch n.	2009-10-22 08:40:00	1.2	5	SH2 Tessmannsdorf nw.	2015-03-09 08:27:00	100.82	SH2 Tessmannsdorf nw.	2014-12-11 11:15:00	2.29	SH2 Tessmannsdorf nw.	2015-03-09 08:27:00	12.6	2.4	UW4 Warnowwerft	2002-12-19 15:00:00	141	UW4 Warnowwerft	2002-11-04 15:35:00	2.23	UW4 Warnowwerft	2007-07-31 09:02:00	5.4	1.2	DB2 Sundische Wiese	2011-08-02 11:45:00	102.345	DB2 Sundische Wiese	2011-07-04 11:45:00	1.591	DB2 Sundische Wiese	2011-10-17 10:05:00	30	0.7	KB90 Fahrwasser I.Libitz w.	2002-07-15 10:06:00	42.5	KB90 Fahrwasser I.Libitz w.	2002-07-15 10:06:00	2.06	KB90 Fahrwasser I.Libitz w.	2002-02-25 09:16:00	3.1	2
WB3 Walfisch n.	2005-06-14 08:07:00	20.3	WB3 Walfisch n.	2005-07-27 08:20:00	1.4	WB3 Walfisch n.	2009-11-12 08:30:00	0.9	5.5	SH2 Tessmannsdorf nw.	2015-04-22 06:50:00	38.35	SH2 Tessmannsdorf nw.	2015-01-14 09:05:00	1.2	SH2 Tessmannsdorf nw.	2015-04-22 06:50:00	4	3.2	UW4 Warnowwerft	2003-01-23 09:10:00	132	UW4 Warnowwerft	2002-12-19 15:00:00	2.12	UW4 Warnowwerft	2007-08-30 11:14:00	50	1.7	DB2 Sundische Wiese	2011-09-06 10:10:00	107.93	DB2 Sundische Wiese	2011-08-02 11:45:00	2.18	DB2 Sundische Wiese	2011-11-07 09:45:00	31.9	0.8	KB90 Fahrwasser I.Libitz w.	2002-07-29 09:35:00	37.8	KB90 Fahrwasser I.Libitz w.	2002-07-29 09:35:00	1.26	KB90 Fahrwasser I.Libitz w.	2002-02-28 15:25:00	15	0.9
WB3 Walfisch n.	2005-07-27 08:20:00	22.1	WB3 Walfisch n.	2005-08-10 08:51:00	1.57	WB3 Walfisch n.	2010-03-18 08:15:00	1.8	5	SH2 Tessmannsdorf nw.	2015-05-18 09:53:00	34.02	SH2 Tessmannsdorf nw.	2015-02-11 09:52:00	1.23	SH2 Tessmannsdorf nw.	2015-05-18 09:53:00	1.5	3.1	UW4 Warnowwerft	2003-03-05 15:00:00	72.4	UW4 Warnowwerft	2003-01-23 09:10:00	1.41	UW4 Warnowwerft	2007-09-19 09:45:00	3.4	3.5	DB2 Sundische Wiese	2011-10-17 10:05:00	67.59	DB2 Sundische Wiese	2011-09-06 10:10:00	5.872	DB2 Sundische Wiese	2011-12-12 09:20:00	57.2	0.5	KB90 Fahrwasser I.Libitz w.	2002-08-12 09:00:00	49.2	KB90 Fahrwasser I.Libitz w.	2002-08-12 09:00:00	2.68	KB90 Fahrwasser I.Libitz w.	2002-03-06 12:20:00	10.4	1
WB3 Walfisch n.	2005-08-10 08:51:00	23.7	WB3 Walfisch n.	2005-09-21 08:25:00	1.37	WB3 Walfisch n.	2010-04-15 07:29:00	2.5	4	SH2 Tessmannsdorf nw.	2015-06-29 08:39:00	36.71	SH2 Tessmannsdorf nw.	2015-03-09 08:27:00	1.16	SH2 Tessmannsdorf nw.	2015-06-29 08:39:00	1.1	3.2	UW4 Warnowwerft	2003-04-28 17:06:00	16.7	UW4 Warnowwerft	2003-03-05 15:00:00	1.02	UW4 Warnowwerft	2007-10-08 09:55:00	3.6	3.5	DB2 Sundische Wiese	2011-11-07 09:45:00	84.069	DB2 Sundische Wiese	2011-10-17 10:05:00	1.357	DB2 Sundische Wiese	2012-01-09 09:30:00	23.9	0.9	KB90 Fahrwasser I.Libitz w.	2002-08-29 08:35:00	40.9	KB90 Fahrwasser I.Libitz w.	2002-08-29 08:35:00	3.3	KB90 Fahrwasser I.Libitz w.	2002-03-20 14:00:00	9	1.2
WB3 Walfisch n.	2005-09-21 08:25:00	21.1	WB3 Walfisch n.	2005-10-12 08:23:00	1.21	WB3 Walfisch n.	2010-05-20 08:34:00	1.2	3	SH2 Tessmannsdorf nw.	2015-07-15 10:22:00	40.37	SH2 Tessmannsdorf nw.	2015-04-22 06:50:00	0.79	SH2 Tessmannsdorf nw.	2015-07-15 10:22:00	3.9	3.5	UW4 Warnowwerft	2003-05-13 17:30:00	29.4	UW4 Warnowwerft	2003-04-28 17:06:00	1.21	UW4 Warnowwerft	2008-02-21 11:10:00	3	2.5	DB2 Sundische Wiese	2011-12-12 09:20:00	109.62	DB2 Sundische Wiese	2011-11-07 09:45:00	1.931	DB2 Sundische Wiese	2012-02-27 09:50:00	33.2	0.7	KB90 Fahrwasser I.Libitz w.	2002-09-25 09:18:00	37	KB90 Fahrwasser I.Libitz w.	2002-09-25 09:18:00	1.64	KB90 Fahrwasser I.Libitz w.	2002-04-02 08:40:00	14.4	2.1
WB3 Walfisch n.	2005-10-12 08:23:00	8.3	WB3 Walfisch n.	2005-11-09 08:32:00	1.25	WB3 Walfisch n.	2010-06-16 08:16:00	2.4	4	SH2 Tessmannsdorf nw.	2015-08-12 07:57:00	40.05	SH2 Tessmannsdorf nw.	2015-05-18 09:53:00	0.88	SH2 Tessmannsdorf nw.	2015-08-12 07:57:00	2.3	2.3	UW4 Warnowwerft	2003-06-10 17:42:00	20	UW4 Warnowwerft	2003-05-13 17:30:00	0.02	UW4 Warnowwerft	2008-03-04 13:16:00	1.9	2.5	DB2 Sundische Wiese	2012-01-09 09:30:00	79.67	DB2 Sundische Wiese	2011-12-12 09:20:00	2.72	DB2 Sundische Wiese	2012-03-15 09:45:00	28.5	0.9	KB90 Fahrwasser I.Libitz w.	2002-10-07 08:21:00	34.8	KB90 Fahrwasser I.Libitz w.	2002-10-07 08:21:00	1.6	KB90 Fahrwasser I.Libitz w.	2002-04-18 11:50:00	5.9	2.9
WB3 Walfisch n.	2005-11-09 08:32:00	28.2	WB3 Walfisch n.	2006-01-11 09:15:00	0.89	WB3 Walfisch n.	2010-07-14 08:22:00	12.5	1.8	SH2 Tessmannsdorf nw.	2015-09-16 08:15:00	37.94	SH2 Tessmannsdorf nw.	2015-06-29 08:39:00	1.67	SH2 Tessmannsdorf nw.	2015-09-16 08:15:00	2.5	3	UW4 Warnowwerft	2003-07-01 17:11:00	25.5	UW4 Warnowwerft	2003-06-10 17:42:00	0.66	UW4 Warnowwerft	2008-04-22 11:29:00	4.1	2	DB2 Sundische Wiese	2012-02-27 09:50:00	131.74	DB2 Sundische Wiese	2012-01-09 09:30:00	1.82	DB2 Sundische Wiese	2012-04-02 10:07:00	15.5	0.8	KB90 Fahrwasser I.Libitz w.	2002-11-14 14:45:00	47.1	KB90 Fahrwasser I.Libitz w.	2002-11-14 14:45:00	2.1	KB90 Fahrwasser I.Libitz w.	2002-05-06 09:16:00	12.5	2
WB3 Walfisch n.	2006-01-11 09:15:00	19	WB3 Walfisch n.	2006-02-22 08:35:00	0.66	WB3 Walfisch n.	2010-08-19 09:04:00	16.2	2	SH2 Tessmannsdorf nw.	2015-10-13 17:36:00	38.09	SH2 Tessmannsdorf nw.	2015-07-15 10:22:00	2.19	SH2 Tessmannsdorf nw.	2015-10-13 17:36:00	5.6	2.3	UW4 Warnowwerft	2003-08-11 14:30:00	19.6	UW4 Warnowwerft	2003-07-01 17:11:00	1.44	UW4 Warnowwerft	2008-05-27 09:00:00	8.1	1.8	DB2 Sundische Wiese	2012-03-15 09:45:00	101.37	DB2 Sundische Wiese	2012-02-27 09:50:00	2.37	DB2 Sundische Wiese	2012-05-07 11:50:00	33.5	0.6	KB90 Fahrwasser I.Libitz w.	2002-12-11 08:50:00	69.5	KB90 Fahrwasser I.Libitz w.	2002-12-11 08:50:00	1.78	KB90 Fahrwasser I.Libitz w.	2002-05-29 09:10:00	13.1	1
WB3 Walfisch n.	2006-02-22 08:35:00	29.7	WB3 Walfisch n.	2006-03-15 14:43:00	0.94	WB3 Walfisch n.	2010-10-20 08:22:05	3.8	4.5	SH2 Tessmannsdorf nw.	2015-11-25 08:39:00	63.57	SH2 Tessmannsdorf nw.	2015-08-12 07:57:00	3.98	SH2 Tessmannsdorf nw.	2015-11-25 08:39:00	8.4	1.3	UW4 Warnowwerft	2003-09-22 18:21:00	19.2	UW4 Warnowwerft	2003-08-11 14:30:00	3.05	UW4 Warnowwerft	2008-07-29 09:20:00	9.7	1	DB2 Sundische Wiese	2012-04-02 10:07:00	60.06	DB2 Sundische Wiese	2012-03-15 09:45:00	1.97	DB2 Sundische Wiese	2012-06-13 10:55:00	19	0.6	KB90 Fahrwasser I.Libitz w.	2003-02-03 08:45:00	65.7	KB90 Fahrwasser I.Libitz w.	2003-02-03 08:45:00	2.31	KB90 Fahrwasser I.Libitz w.	2002-06-03 09:36:00	15	1.1
WB3 Walfisch n.	2006-03-15 14:43:00	19.8	WB3 Walfisch n.	2006-04-12 08:07:00	0.27	WB3 Walfisch n.	2010-11-17 10:13:14	3.9	3.5	SH2 Tessmannsdorf nw.	2015-12-14 08:31:00	82.61	SH2 Tessmannsdorf nw.	2015-09-16 08:15:00	1.7	SH2 Tessmannsdorf nw.	2015-12-14 08:31:00	2.4	1.7	UW4 Warnowwerft	2003-12-04 09:20:00	31.7	UW4 Warnowwerft	2003-09-22 18:21:00	1.46	UW4 Warnowwerft	2008-08-26 09:18:00	9.6	2	DB2 Sundische Wiese	2012-05-07 11:50:00	73.37	DB2 Sundische Wiese	2012-04-02 10:07:00	1.82	DB2 Sundische Wiese	2012-07-09 08:40:00	9.7	0.9	KB90 Fahrwasser I.Libitz w.	2003-03-17 10:15:00	37	KB90 Fahrwasser I.Libitz w.	2003-03-17 10:15:00	0.66	KB90 Fahrwasser I.Libitz w.	2002-07-15 10:06:00	7.7	1
WB3 Walfisch n.	2006-04-12 08:07:00	29.1	WB3 Walfisch n.	2006-08-23 11:05:00	2.27	WB3 Walfisch n.	2011-01-12 08:41:23	1	4	SH2 Tessmannsdorf nw.	2016-02-22 08:50:00	169.99	SH2 Tessmannsdorf nw.	2015-10-13 17:36:00	1.36	SH2 Tessmannsdorf nw.	2016-02-22 08:50:00	4	1.9	UW4 Warnowwerft	2004-01-06 15:15:00	49.4	UW4 Warnowwerft	2003-12-04 09:20:00	1.43	UW4 Warnowwerft	2009-01-20 08:23:00	0.6	4.5	DB2 Sundische Wiese	2012-06-13 10:55:00	52.78	DB2 Sundische Wiese	2012-05-07 11:50:00	2.22	DB2 Sundische Wiese	2012-08-06 08:25:00	24.5	0.5	KB90 Fahrwasser I.Libitz w.	2003-04-24 16:18:00	31.1	KB90 Fahrwasser I.Libitz w.	2003-04-24 16:18:00	0.72	KB90 Fahrwasser I.Libitz w.	2002-07-29 09:35:00	11.5	1.3
WB3 Walfisch n.	2006-08-23 11:05:00	32.3	WB3 Walfisch n.	2006-09-21 09:05:00	1.32	WB3 Walfisch n.	2011-02-02 08:36:02	3.5	3	SH2 Tessmannsdorf nw.	2016-03-07 08:41:00	153.02	SH2 Tessmannsdorf nw.	2015-11-25 08:39:00	1.44	SH2 Tessmannsdorf nw.	2016-03-07 08:41:00	5.6	2.1	UW4 Warnowwerft	2004-02-05 08:30:00	69.9	UW4 Warnowwerft	2004-01-06 15:15:00	1.63	UW4 Warnowwerft	2009-02-18 13:32:00	2.9	5	DB2 Sundische Wiese	2012-07-09 08:40:00	47.7	DB2 Sundische Wiese	2012-06-13 10:55:00	1.68	DB2 Sundische Wiese	2012-09-18 10:40:00	20	0.8	KB90 Fahrwasser I.Libitz w.	2003-05-07 16:45:00	18.5	KB90 Fahrwasser I.Libitz w.	2003-05-07 16:45:00	0.49	KB90 Fahrwasser I.Libitz w.	2002-08-12 09:00:00	25.7	1.2
WB3 Walfisch n.	2006-09-21 09:05:00	11.7	WB3 Walfisch n.	2006-10-19 09:12:00	1.09	WB3 Walfisch n.	2011-03-10 08:05:00	14.6	2.5	SH2 Tessmannsdorf nw.	2016-04-20 09:33:00	37.74	SH2 Tessmannsdorf nw.	2015-12-14 08:31:00	0.88	SH2 Tessmannsdorf nw.	2016-04-20 09:33:00	0.9	3.3	UW4 Warnowwerft	2004-03-11 10:45:00	102	UW4 Warnowwerft	2004-02-05 08:30:00	1.58	UW4 Warnowwerft	2009-04-15 09:20:00	4.3	3.5	DB2 Sundische Wiese	2012-08-06 08:25:00	45.76	DB2 Sundische Wiese	2012-07-09 08:40:00	1.49	DB2 Sundische Wiese	2012-10-16 10:45:00	19.8	1	KB90 Fahrwasser I.Libitz w.	2003-05-15 16:29:00	38.5	KB90 Fahrwasser I.Libitz w.	2003-05-15 16:29:00	0.96	KB90 Fahrwasser I.Libitz w.	2002-08-29 08:35:00	19	1.7
WB3 Walfisch n.	2006-10-19 09:12:00	14.2	WB3 Walfisch n.	2006-12-19 09:15:00	0.73	WB3 Walfisch n.	2011-04-06 08:24:49	0.9	4.5	SH2 Tessmannsdorf nw.	2016-05-11 06:37:00	34.19	SH2 Tessmannsdorf nw.	2016-02-22 08:50:00	0.93	SH2 Tessmannsdorf nw.	2016-05-11 06:37:00	3.8	3.1	UW4 Warnowwerft	2004-03-31 09:20:00	108	UW4 Warnowwerft	2004-03-11 10:45:00	6.78	UW4 Warnowwerft	2009-06-09 10:12:00	10.3	1.7	DB2 Sundische Wiese	2012-09-18 10:40:00	60.96	DB2 Sundische Wiese	2012-08-06 08:25:00	1.34	DB2 Sundische Wiese	2012-11-06 10:20:00	13.9	1	KB90 Fahrwasser I.Libitz w.	2003-06-10 09:34:00	53.8	KB90 Fahrwasser I.Libitz w.	2003-06-10 09:34:00	2.05	KB90 Fahrwasser I.Libitz w.	2002-09-25 09:18:00	10.5	2.4
WB3 Walfisch n.	2006-12-19 09:15:00	32.3	WB3 Walfisch n.	2007-02-07 09:08:00	0.81	WB3 Walfisch n.	2011-05-25 08:14:56	2.8	3	SH2 Tessmannsdorf nw.	2016-06-08 08:59:00	31.24	SH2 Tessmannsdorf nw.	2016-03-07 08:41:00	0.72	SH2 Tessmannsdorf nw.	2016-06-08 08:59:00	1.2	2.4	UW4 Warnowwerft	2004-05-17 17:35:00	18.6	UW4 Warnowwerft	2004-03-31 09:20:00	1.27	UW4 Warnowwerft	2009-07-14 09:27:00	3.9	2.1	DB2 Sundische Wiese	2012-10-16 10:45:00	47.5	DB2 Sundische Wiese	2012-09-18 10:40:00	1.71	DB2 Sundische Wiese	2013-01-08 10:00:00	36.2	0.7	KB90 Fahrwasser I.Libitz w.	2003-07-01 10:02:00	37.6	KB90 Fahrwasser I.Libitz w.	2003-06-17 09:21:00	1.5	KB90 Fahrwasser I.Libitz w.	2002-10-07 08:21:00	8	1.8
WB3 Walfisch n.	2007-02-07 09:08:00	42.05	WB3 Walfisch n.	2007-03-27 08:52:00	0.77	WB3 Walfisch n.	2011-06-29 08:15:43	3.6	3	SH2 Tessmannsdorf nw.	2016-07-21 08:32:00	42.42	SH2 Tessmannsdorf nw.	2016-04-20 09:33:00	0.56	SH2 Tessmannsdorf nw.	2016-07-21 08:32:00	2.9	2.7	UW4 Warnowwerft	2004-06-21 15:45:00	26.3	UW4 Warnowwerft	2004-05-17 17:35:00	0.87	UW4 Warnowwerft	2009-08-18 11:20:00	6	2	DB2 Sundische Wiese	2012-11-06 10:20:00	36.66	DB2 Sundische Wiese	2012-10-16 10:45:00	1.45	DB2 Sundische Wiese	2013-04-17 10:25:00	77.4	0.4	KB90 Fahrwasser I.Libitz w.	2003-07-07 09:50:00	18.8	KB90 Fahrwasser I.Libitz w.	2003-07-01 10:02:00	1.52	KB90 Fahrwasser I.Libitz w.	2002-11-14 14:45:00	17.3	2
WB3 Walfisch n.	2007-03-27 08:52:00	30.84	WB3 Walfisch n.	2007-06-20 11:45:00	0.88	WB3 Walfisch n.	2011-07-13 08:14:25	5.3	1.8	SH2 Tessmannsdorf nw.	2016-08-10 10:28:00	68.26	SH2 Tessmannsdorf nw.	2016-05-11 06:37:00	0.95	SH2 Tessmannsdorf nw.	2016-08-10 10:28:00	17.1	1.2	UW4 Warnowwerft	2004-07-20 09:35:00	32.5	UW4 Warnowwerft	2004-06-21 15:45:00	1.84	UW4 Warnowwerft	2009-09-15 09:36:00	9.6	2.1	DB2 Sundische Wiese	2013-01-08 10:00:00	100.27	DB2 Sundische Wiese	2012-11-06 10:20:00	1.05	DB2 Sundische Wiese	2013-05-23 11:40:00	63.4	0.4	KB90 Fahrwasser I.Libitz w.	2003-08-07 15:00:00	31.3	KB90 Fahrwasser I.Libitz w.	2003-07-07 09:50:00	0.64	KB90 Fahrwasser I.Libitz w.	2002-12-11 08:50:00	3.8	2.3
WB3 Walfisch n.	2007-06-20 11:45:00	20.36	WB3 Walfisch n.	2007-07-12 10:45:00	1.15	WB3 Walfisch n.	2011-08-25 08:35:03	6	3.3	SH2 Tessmannsdorf nw.	2016-09-15 08:03:00	44.66	SH2 Tessmannsdorf nw.	2016-06-08 08:59:00	1.8	SH2 Tessmannsdorf nw.	2016-09-15 08:03:00	2.9	1.3	UW4 Warnowwerft	2004-08-16 17:35:00	18.8	UW4 Warnowwerft	2004-07-20 09:35:00	1.38	UW4 Warnowwerft	2009-10-20 10:00:00	17.1	2.8	DB2 Sundische Wiese	2013-04-17 10:25:00	134.04	DB2 Sundische Wiese	2013-01-08 10:00:00	2.17	DB2 Sundische Wiese	2013-06-10 12:00:00	32.3	0.3	KB90 Fahrwasser I.Libitz w.	2003-08-21 16:30:00	30.9	KB90 Fahrwasser I.Libitz w.	2003-08-07 15:00:00	2.31	KB90 Fahrwasser I.Libitz w.	2003-02-03 08:45:00	10.4	1.2
WB3 Walfisch n.	2007-07-12 10:45:00	23.87	WB3 Walfisch n.	2007-08-28 09:07:00	1.1	WB3 Walfisch n.	2011-09-21 08:17:42	4.7	3	SH2 Tessmannsdorf nw.	2016-10-12 09:09:00	32.19	SH2 Tessmannsdorf nw.	2016-07-21 08:32:00	2.9	SH2 Tessmannsdorf nw.	2016-11-10 08:01:00	1	1.6	UW4 Warnowwerft	2004-09-14 16:30:00	22.9	UW4 Warnowwerft	2004-08-16 17:35:00	2.08	UW4 Warnowwerft	2010-01-27 09:24:00	4.6	3	DB2 Sundische Wiese	2013-05-23 11:40:00	119.31	DB2 Sundische Wiese	2013-04-17 10:25:00	2.32	DB2 Sundische Wiese	2013-07-08 11:00:00	24.9	0.5	KB90 Fahrwasser I.Libitz w.	2003-09-22 10:35:00	27.3	KB90 Fahrwasser I.Libitz w.	2003-08-21 16:30:00	1.26	KB90 Fahrwasser I.Libitz w.	2003-03-17 10:15:00	6
WB3 Walfisch n.	2007-08-28 09:07:00	20.24	WB3 Walfisch n.	2007-09-12 10:09:00	1.25	WB3 Walfisch n.	2012-01-18 08:24:00	1.2	2.5	SH2 Tessmannsdorf nw.	2016-11-10 08:01:00	27.75	SH2 Tessmannsdorf nw.	2016-08-10 10:28:00	3.4	SH2 Tessmannsdorf nw.	2016-12-20 08:36:00	8.5	1.6	UW4 Warnowwerft	2004-10-06 14:30:00	26.6	UW4 Warnowwerft	2004-09-14 16:30:00	1.79	UW4 Warnowwerft	2010-02-24 09:32:00	2.5	2.5	DB2 Sundische Wiese	2013-06-10 12:00:00	76.73	DB2 Sundische Wiese	2013-05-23 11:40:00	3.23	DB2 Sundische Wiese	2013-08-22 08:50:00	53	0.6	KB90 Fahrwasser I.Libitz w.	2003-09-29 09:36:00	31.7	KB90 Fahrwasser I.Libitz w.	2003-09-22 10:35:00	0.98	KB90 Fahrwasser I.Libitz w.	2003-04-24 16:18:00	5.4	2.5
WB3 Walfisch n.	2007-09-12 10:09:00	25.76	WB3 Walfisch n.	2007-10-10 10:14:00	1.19	WB3 Walfisch n.	2012-03-07 08:12:00	2.1	5	SH2 Tessmannsdorf nw.	2016-12-20 08:36:00	67.35	SH2 Tessmannsdorf nw.	2016-09-15 08:03:00	1.72	SH2 Tessmannsdorf nw.	2017-01-18 08:42:00	1.3	1.5	UW4 Warnowwerft	2004-11-30 09:40:00	64.7	UW4 Warnowwerft	2004-10-06 14:30:00	1.27	UW4 Warnowwerft	2010-03-16 08:33:00	9.4	1.8	DB2 Sundische Wiese	2013-07-08 11:00:00	84.94	DB2 Sundische Wiese	2013-06-10 12:00:00	2.36	DB2 Sundische Wiese	2013-09-18 09:40:00	95.5	0.4	KB90 Fahrwasser I.Libitz w.	2003-10-07 18:52:00	28	KB90 Fahrwasser I.Libitz w.	2003-09-29 09:36:00	1.29	KB90 Fahrwasser I.Libitz w.	2003-05-07 16:45:00	6	1.7
WB3 Walfisch n.	2007-10-10 10:14:00	17.56	WB3 Walfisch n.	2008-01-17 09:15:00	1.62	WB3 Walfisch n.	2012-05-09 08:27:00	1.7	4	SH2 Tessmannsdorf nw.	2017-01-18 08:42:00	97.19	SH2 Tessmannsdorf nw.	2016-10-12 09:09:00	0.88	SH2 Tessmannsdorf nw.	2017-02-23 08:47:00	11.5	1.8	UW4 Warnowwerft	2005-01-18 11:00:00	68.1	UW4 Warnowwerft	2004-11-30 09:40:00	1.56	UW4 Warnowwerft	2010-04-13 10:59:00	20.3	2	DB2 Sundische Wiese	2013-08-22 08:50:00	63.44	DB2 Sundische Wiese	2013-07-08 11:00:00	2.1	DB2 Sundische Wiese	2013-10-07 10:40:00	91.7	0.4	KB90 Fahrwasser I.Libitz w.	2003-11-06 17:00:00	30.4	KB90 Fahrwasser I.Libitz w.	2003-10-07 18:52:00	0.88	KB90 Fahrwasser I.Libitz w.	2003-05-15 16:29:00	12.2	1
WB3 Walfisch n.	2008-01-17 09:15:00	29.8	WB3 Walfisch n.	2008-02-25 11:01:00	0.94	WB3 Walfisch n.	2012-06-07 08:08:00	1.3	4.5	SH2 Tessmannsdorf nw.	2017-02-23 08:47:00	89.94	SH2 Tessmannsdorf nw.	2016-11-10 08:01:00	0.64	SH2 Tessmannsdorf nw.	2017-03-29 08:37:00	1.8	1.6	UW4 Warnowwerft	2005-02-01 11:00:00	81.5	UW4 Warnowwerft	2005-01-18 11:00:00	1.07	UW4 Warnowwerft	2010-05-19 09:47:00	6.6	1.8	DB2 Sundische Wiese	2013-09-18 09:40:00	78.47	DB2 Sundische Wiese	2013-08-22 08:50:00	2.05	DB2 Sundische Wiese	2013-11-11 10:00:00	28.8	0.8	KB90 Fahrwasser I.Libitz w.	2003-12-04 16:20:00	31	KB90 Fahrwasser I.Libitz w.	2003-11-06 17:00:00	1.31	KB90 Fahrwasser I.Libitz w.	2003-06-10 09:34:00	23.7	0.9
WB3 Walfisch n.	2008-02-25 11:01:00	38.98	WB3 Walfisch n.	2008-03-03 09:48:00	0.79	WB3 Walfisch n.	2012-07-04 08:35:00	3.6	2.5	SH2 Tessmannsdorf nw.	2017-03-29 08:37:00	145.08	SH2 Tessmannsdorf nw.	2016-12-20 08:36:00	0.91	SH2 Tessmannsdorf nw.	2017-04-27 08:18:00	0.8	4.1	UW4 Warnowwerft	2005-03-03 12:27:00	116	UW4 Warnowwerft	2005-02-01 11:00:00	1.49	UW4 Warnowwerft	2010-06-15 09:55:00	10.9	1.4	DB2 Sundische Wiese	2013-10-07 10:40:00	88.25	DB2 Sundische Wiese	2013-09-18 09:40:00	2.13	DB2 Sundische Wiese	2013-12-09 09:50:00	32.4	0.5	KB90 Fahrwasser I.Libitz w.	2004-02-06 13:00:00	44.6	KB90 Fahrwasser I.Libitz w.	2003-12-04 16:20:00	1.24	KB90 Fahrwasser I.Libitz w.	2003-06-17 09:21:00	8.6	1.2
WB3 Walfisch n.	2008-03-03 09:48:00	30.81	WB3 Walfisch n.	2008-05-28 08:19:00	1.82	WB3 Walfisch n.	2012-08-15 08:38:04	4.5	3	SH2 Tessmannsdorf nw.	2017-04-27 08:18:00	52.54	SH2 Tessmannsdorf nw.	2017-01-18 08:42:00	0.75	SH2 Tessmannsdorf nw.	2017-05-29 08:28:00	1.9	3.5	UW4 Warnowwerft	2005-04-05 09:55:00	83.6	UW4 Warnowwerft	2005-03-03 12:27:00	1.63	UW4 Warnowwerft	2010-07-13 09:36:00	14.7	1.6	DB2 Sundische Wiese	2013-11-11 10:00:00	55.87	DB2 Sundische Wiese	2013-10-07 10:40:00	2.16	DB2 Sundische Wiese	2014-01-13 09:45:00	13.6	0.7	KB90 Fahrwasser I.Libitz w.	2004-02-11 14:45:00	34.2	KB90 Fahrwasser I.Libitz w.	2004-02-06 13:00:00	1.2	KB90 Fahrwasser I.Libitz w.	2003-07-01 10:02:00	14.1	1.2
WB3 Walfisch n.	2008-05-28 08:19:00	37.01	WB3 Walfisch n.	2008-07-09 08:29:00	1.36	WB3 Walfisch n.	2012-09-05 08:24:00	3.9	2	SH2 Tessmannsdorf nw.	2017-05-29 08:28:00	41.4	SH2 Tessmannsdorf nw.	2017-02-23 08:47:00	1.12	SH2 Tessmannsdorf nw.	2017-06-21 08:07:00	1.3	3.5	UW4 Warnowwerft	2005-05-24 08:50:00	34.6	UW4 Warnowwerft	2005-04-05 09:55:00	0.59	UW4 Warnowwerft	2010-08-17 10:50:00	10.5	2.5	DB2 Sundische Wiese	2013-12-09 09:50:00	68.82	DB2 Sundische Wiese	2013-11-11 10:00:00	1.42	DB2 Sundische Wiese	2014-02-18 10:38:00	33.9	0.6	KB90 Fahrwasser I.Libitz w.	2004-03-24 11:45:00	62.1	KB90 Fahrwasser I.Libitz w.	2004-02-11 14:45:00	0.66	KB90 Fahrwasser I.Libitz w.	2003-07-07 09:50:00	2	2.5
WB3 Walfisch n.	2008-07-09 08:29:00	26.26	WB3 Walfisch n.	2008-08-27 08:30:00	2.02	WB3 Walfisch n.	2013-04-04 08:20:00	0.7	5.5	SH2 Tessmannsdorf nw.	2017-06-21 08:07:00	41.41	SH2 Tessmannsdorf nw.	2017-03-29 08:37:00	2.23	SH2 Tessmannsdorf nw.	2017-07-13 08:11:00	3.8	2.5	UW4 Warnowwerft	2005-06-13 11:47:00	34.2	UW4 Warnowwerft	2005-05-24 08:50:00	0.99	UW4 Warnowwerft	2010-11-16 11:43:54	1.5	2	DB2 Sundische Wiese	2014-01-13 09:45:00	63.88	DB2 Sundische Wiese	2013-12-09 09:50:00	1.77	DB2 Sundische Wiese	2014-03-05 10:00:00	29.8	0.8	KB90 Fahrwasser I.Libitz w.	2004-03-30 08:30:00	45.8	KB90 Fahrwasser I.Libitz w.	2004-03-24 11:45:00	1.2	KB90 Fahrwasser I.Libitz w.	2003-08-07 15:00:00	14.7	1.2
WB3 Walfisch n.	2008-08-27 08:30:00	30.17	WB3 Walfisch n.	2009-01-21 08:30:00	1.01	WB3 Walfisch n.	2013-05-15 08:08:00	2.1	4	SH2 Tessmannsdorf nw.	2017-07-13 08:11:00	41.88	SH2 Tessmannsdorf nw.	2017-04-27 08:18:00	0.68	SH2 Tessmannsdorf nw.	2017-08-24 09:55:00	2.1	2.4	UW4 Warnowwerft	2005-07-26 10:05:00	28.3	UW4 Warnowwerft	2005-06-13 11:47:00	1.36	UW4 Warnowwerft	2010-12-14 10:58:35	1.3	1.8	DB2 Sundische Wiese	2014-02-18 10:38:00	152.71	DB2 Sundische Wiese	2014-01-13 09:45:00	1.45	DB2 Sundische Wiese	2014-04-02 10:00:00	25.4	0.6	KB90 Fahrwasser I.Libitz w.	2004-04-19 09:40:00	33.3	KB90 Fahrwasser I.Libitz w.	2004-03-30 08:30:00	8.8	KB90 Fahrwasser I.Libitz w.	2003-08-21 16:30:00	8.7	0.9
WB3 Walfisch n.	2009-01-21 08:30:00	31.12	WB3 Walfisch n.	2009-02-18 08:25:00	0.83	WB3 Walfisch n.	2013-06-19 08:07:00	3.8	3.5	SH2 Tessmannsdorf nw.	2017-08-24 09:55:00	49.54	SH2 Tessmannsdorf nw.	2017-05-29 08:28:00	1.24	SH2 Tessmannsdorf nw.	2017-09-14 08:25:00	23.5	0.3	UW4 Warnowwerft	2005-08-09 09:29:00	25.5	UW4 Warnowwerft	2005-07-26 10:05:00	2.29	UW4 Warnowwerft	2011-01-12 13:00:31	2.1	1.2	DB2 Sundische Wiese	2014-03-05 10:00:00	107.06	DB2 Sundische Wiese	2014-02-18 10:38:00	2.44	DB2 Sundische Wiese	2014-05-19 10:00:00	24.3	0.5	KB90 Fahrwasser I.Libitz w.	2004-04-27 08:35:00	29.1	KB90 Fahrwasser I.Libitz w.	2004-04-19 09:40:00	1.1	KB90 Fahrwasser I.Libitz w.	2003-09-22 10:35:00	7.5	1.7
WB3 Walfisch n.	2009-02-18 08:25:00	27.85	WB3 Walfisch n.	2009-04-22 08:30:00	0.48	WB3 Walfisch n.	2013-07-03 08:18:00	2.9	3	SH2 Tessmannsdorf nw.	2017-09-14 08:25:00	82.19	SH2 Tessmannsdorf nw.	2017-06-21 08:07:00	1.4	SH2 Tessmannsdorf nw.	2017-10-19 08:20:00	3.3	2.5	UW4 Warnowwerft	2005-09-20 10:15:00	16.6	UW4 Warnowwerft	2005-08-09 09:29:00	3.28	UW4 Warnowwerft	2011-02-02 13:04:47	2.8	1.8	DB2 Sundische Wiese	2014-04-02 10:00:00	56.54	DB2 Sundische Wiese	2014-03-05 10:00:00	1.76	DB2 Sundische Wiese	2014-06-12 11:50:00	30.3	0.5	KB90 Fahrwasser I.Libitz w.	2004-05-03 08:50:00	38.9	KB90 Fahrwasser I.Libitz w.	2004-04-27 08:35:00	1.11	KB90 Fahrwasser I.Libitz w.	2003-09-29 09:36:00	10.8	1.5
WB3 Walfisch n.	2009-04-22 08:30:00	22.22	WB3 Walfisch n.	2009-06-11 08:05:00	1.07	WB3 Walfisch n.	2013-08-22 08:08:00	6.6	2.5	SH2 Tessmannsdorf nw.	2017-10-19 08:20:00	125.68	SH2 Tessmannsdorf nw.	2017-07-13 08:11:00	1.5	SH2 Tessmannsdorf nw.	2017-11-08 08:31:00	2.4	3.6	UW4 Warnowwerft	2005-10-11 09:20:00	18.7	UW4 Warnowwerft	2005-09-20 10:15:00	1.62	UW4 Warnowwerft	2011-03-09 08:31:25	8.1	2	DB2 Sundische Wiese	2014-05-19 10:00:00	73.03	DB2 Sundische Wiese	2014-04-02 10:00:00	1.15	DB2 Sundische Wiese	2014-07-28 08:25:00	30.9	0.6	KB90 Fahrwasser I.Libitz w.	2004-05-17 09:30:00	20.2	KB90 Fahrwasser I.Libitz w.	2004-05-03 08:50:00	2.1	KB90 Fahrwasser I.Libitz w.	2003-10-07 18:52:00	4.8
WB3 Walfisch n.	2009-06-11 08:05:00	24.86	WB3 Walfisch n.	2009-07-15 08:15:00	1.39	WB3 Walfisch n.	2013-09-12 08:35:00	3	4.5	SH2 Tessmannsdorf nw.	2017-11-08 08:31:00	187.03	SH2 Tessmannsdorf nw.	2017-08-24 09:55:00	1.73	SH2 Tessmannsdorf nw.	2017-12-07 08:43:00	9.5	1.1	UW4 Warnowwerft	2005-11-08 09:09:00	36.8	UW4 Warnowwerft	2005-10-11 09:20:00	1.47	UW4 Warnowwerft	2011-04-06 12:47:58	3.1	3	DB2 Sundische Wiese	2014-06-12 11:50:00	77.72	DB2 Sundische Wiese	2014-05-19 10:00:00	2.28	DB2 Sundische Wiese	2014-08-05 07:55:00	36.3	0.5	KB90 Fahrwasser I.Libitz w.	2004-06-14 09:14:00	22.2	KB90 Fahrwasser I.Libitz w.	2004-05-17 09:30:00	2.91	KB90 Fahrwasser I.Libitz w.	2003-11-06 17:00:00	6.6	1
WB3 Walfisch n.	2009-07-15 08:15:00	37.81	WB3 Walfisch n.	2009-08-20 08:45:00	1.34	WB3 Walfisch n.	2013-10-09 08:37:00	2.6	5.5	SH2 Tessmannsdorf nw.	2017-12-07 08:43:00	151.04	SH2 Tessmannsdorf nw.	2017-09-14 08:25:00	2.71	SH2 Tessmannsdorf nw.	2018-01-17 08:40:00	5.1	1.5	UW4 Warnowwerft	2006-01-10 09:30:00	107	UW4 Warnowwerft	2005-11-08 09:09:00	2.29	UW4 Warnowwerft	2011-05-24 09:07:36	4.4	2	DB2 Sundische Wiese	2014-07-28 08:25:00	77.95	DB2 Sundische Wiese	2014-06-12 11:50:00	2.16	DB2 Sundische Wiese	2014-09-08 09:25:00	26.7	0.7	KB90 Fahrwasser I.Libitz w.	2004-06-24 17:10:00	26.4	KB90 Fahrwasser I.Libitz w.	2004-06-14 09:14:00	1.18	KB90 Fahrwasser I.Libitz w.	2003-12-04 16:20:00	8
WB3 Walfisch n.	2009-08-20 08:45:00	17.3	WB3 Walfisch n.	2009-09-17 08:45:00	1.79	WB3 Walfisch n.	2013-11-13 08:27:00	1.2	5	SH2 Tessmannsdorf nw.	2018-01-17 08:40:00	204.44	SH2 Tessmannsdorf nw.	2017-10-19 08:20:00	0.98	SH2 Tessmannsdorf nw.	2018-02-21 08:36:00	1.1	2.5	UW4 Warnowwerft	2006-02-21 10:19:00	97.4	UW4 Warnowwerft	2006-01-10 09:30:00	1.26	UW4 Warnowwerft	2011-06-28 09:29:23	41	1	DB2 Sundische Wiese	2014-08-05 07:55:00	82.86	DB2 Sundische Wiese	2014-07-28 08:25:00	1.68	DB2 Sundische Wiese	2014-10-06 09:35:00	37.4	0.8	KB90 Fahrwasser I.Libitz w.	2004-07-06 10:55:00	13.5	KB90 Fahrwasser I.Libitz w.	2004-06-24 17:10:00	1.49	KB90 Fahrwasser I.Libitz w.	2004-02-06 13:00:00	9.6	1.7
WB3 Walfisch n.	2009-09-17 08:45:00	26.98	WB3 Walfisch n.	2009-10-22 08:40:00	1.55	WB3 Walfisch n.	2014-02-27 08:22:00	2.1	6	SH2 Tessmannsdorf nw.	2018-02-21 08:36:00	201.44	SH2 Tessmannsdorf nw.	2017-11-08 08:31:00	0.74	SH2 Tessmannsdorf nw.	2018-03-22 06:56:00	17.2	1.7	UW4 Warnowwerft	2006-03-16 13:26:00	89.9	UW4 Warnowwerft	2006-02-21 10:19:00	2.28	UW4 Warnowwerft	2011-07-12 09:41:26	19.4	1.2	DB2 Sundische Wiese	2014-09-08 09:25:00	63.18	DB2 Sundische Wiese	2014-08-05 07:55:00	1.92	DB2 Sundische Wiese	2014-11-04 10:20:00	28.7	0.8	KB90 Fahrwasser I.Libitz w.	2004-07-19 10:55:00	42.5	KB90 Fahrwasser I.Libitz w.	2004-07-06 10:55:00	0.19	KB90 Fahrwasser I.Libitz w.	2004-02-11 14:45:00	2.4	1.8
WB3 Walfisch n.	2009-10-22 08:40:00	26.81	WB3 Walfisch n.	2009-11-12 08:30:00	1.05	WB3 Walfisch n.	2014-06-04 08:25:00	1.6	5	SH2 Tessmannsdorf nw.	2018-03-22 06:56:00	144.94	SH2 Tessmannsdorf nw.	2017-12-07 08:43:00	1.6	SH2 Tessmannsdorf nw.	2018-04-11 08:20:00	2	2.9	UW4 Warnowwerft	2006-04-11 10:48:00	132	UW4 Warnowwerft	2006-03-16 13:26:00	2.76	UW4 Warnowwerft	2011-08-23 09:59:46	8.3	1.4	DB2 Sundische Wiese	2014-10-06 09:35:00	69.71	DB2 Sundische Wiese	2014-09-08 09:25:00	1.52	DB2 Sundische Wiese	2015-01-07 10:00:00	21.5	0.6	KB90 Fahrwasser I.Libitz w.	2004-08-10 09:15:00	46.9	KB90 Fahrwasser I.Libitz w.	2004-07-19 10:55:00	1.17	KB90 Fahrwasser I.Libitz w.	2004-03-24 11:45:00	17	1.2
WB3 Walfisch n.	2009-11-12 08:30:00	22.8	WB3 Walfisch n.	2010-03-18 08:15:00	0.75	WB3 Walfisch n.	2014-07-17 08:29:00	6.5	2.5	SH2 Tessmannsdorf nw.	2018-04-11 08:20:00	148.01	SH2 Tessmannsdorf nw.	2018-01-17 08:40:00	1.7	SH2 Tessmannsdorf nw.	2018-05-17 06:55:00	1.9	2.3	UW4 Warnowwerft	2006-07-26 09:30:00	24	UW4 Warnowwerft	2006-04-11 10:48:00	1.17	UW4 Warnowwerft	2011-09-19 09:26:52	2.6	2.5	DB2 Sundische Wiese	2014-11-04 10:20:00	60.28	DB2 Sundische Wiese	2014-10-06 09:35:00	1.44	DB2 Sundische Wiese	2015-02-18 10:10:00	22.7	0.8	KB90 Fahrwasser I.Libitz w.	2004-08-19 16:20:00	18.6	KB90 Fahrwasser I.Libitz w.	2004-08-10 09:15:00	1.88	KB90 Fahrwasser I.Libitz w.	2004-03-30 08:30:00	7.7	1.6
WB3 Walfisch n.	2010-03-18 08:15:00	58.2	WB3 Walfisch n.	2010-04-15 07:29:00	0.5	WB3 Walfisch n.	2014-09-10 08:19:00	1.9	4	SH2 Tessmannsdorf nw.	2018-05-17 06:55:00	40.42	SH2 Tessmannsdorf nw.	2018-02-21 08:36:00	0.68	SH2 Tessmannsdorf nw.	2018-06-20 09:03:00	3.5	3.7	UW4 Warnowwerft	2006-09-20 10:15:00	19.6	UW4 Warnowwerft	2006-07-26 09:30:00	2.17	UW4 Warnowwerft	2012-01-17 09:52:00	1.3	1.6	DB2 Sundische Wiese	2015-01-07 10:00:00	119.36	DB2 Sundische Wiese	2014-11-04 10:20:00	1.18	DB2 Sundische Wiese	2015-03-11 09:20:00	30.6	0.7	KB90 Fahrwasser I.Libitz w.	2004-09-14 09:00:00	47.1	KB90 Fahrwasser I.Libitz w.	2004-08-19 16:20:00	1.51	KB90 Fahrwasser I.Libitz w.	2004-04-19 09:40:00	6.7	2
WB3 Walfisch n.	2010-04-15 07:29:00	21.65	WB3 Walfisch n.	2010-05-20 08:34:00	0.86	WB3 Walfisch n.	2014-10-23 08:44:00	3.4	3.5	SH2 Tessmannsdorf nw.	2018-06-20 09:03:00	42.11	SH2 Tessmannsdorf nw.	2018-03-22 06:56:00	2.58	SH2 Tessmannsdorf nw.	2018-07-04 08:28:00	1.7	4.3	UW4 Warnowwerft	2006-10-17 09:36:00	43.2	UW4 Warnowwerft	2006-09-20 10:15:00	1.25	UW4 Warnowwerft	2012-03-08 10:06:00	1.4	2.5	DB2 Sundische Wiese	2015-02-18 10:10:00	178.61	DB2 Sundische Wiese	2015-01-07 10:00:00	2.24	DB2 Sundische Wiese	2015-04-08 09:15:00	46.4	0.5	KB90 Fahrwasser I.Libitz w.	2004-09-22 09:20:00	44.2	KB90 Fahrwasser I.Libitz w.	2004-09-14 09:00:00	1.7	KB90 Fahrwasser I.Libitz w.	2004-04-27 08:35:00	7.3	1.5
WB3 Walfisch n.	2010-05-20 08:34:00	20.22	WB3 Walfisch n.	2010-06-16 08:16:00	0.76	WB3 Walfisch n.	2014-11-10 10:46:00	1.6	6	SH2 Tessmannsdorf nw.	2018-07-04 08:28:00	18.66	SH2 Tessmannsdorf nw.	2018-04-11 08:20:00	0.81	SH2 Tessmannsdorf nw.	2018-08-29 09:31:00	1.5	4.2	UW4 Warnowwerft	2006-12-13 10:55:00	54.9	UW4 Warnowwerft	2006-10-17 09:36:00	3.05	UW4 Warnowwerft	2012-05-08 09:34:00	16.7	1.2	DB2 Sundische Wiese	2015-03-11 09:20:00	177.44	DB2 Sundische Wiese	2015-02-18 10:10:00	1.93	DB2 Sundische Wiese	2015-05-06 10:00:00	39.2	0.4	KB90 Fahrwasser I.Libitz w.	2004-10-04 09:30:00	35.1	KB90 Fahrwasser I.Libitz w.	2004-09-22 09:20:00	2.26	KB90 Fahrwasser I.Libitz w.	2004-05-03 08:50:00	5.4	1.6
WB3 Walfisch n.	2010-06-16 08:16:00	24.01	WB3 Walfisch n.	2010-07-14 08:22:00	2.13	WB3 Walfisch n.	2015-02-19 08:15:00	71.7	1.5	SH2 Tessmannsdorf nw.	2018-08-29 09:31:00	38.25	SH2 Tessmannsdorf nw.	2018-05-17 06:55:00	0.72	SH2 Tessmannsdorf nw.	2018-09-27 08:16:00	2.2	3.4	UW4 Warnowwerft	2007-02-06 10:05:00	205	UW4 Warnowwerft	2006-12-13 10:55:00	2.14	UW4 Warnowwerft	2012-06-06 09:21:00	4.6	1.6	DB2 Sundische Wiese	2015-04-08 09:15:00	123.34	DB2 Sundische Wiese	2015-03-11 09:20:00	2.11	DB2 Sundische Wiese	2015-06-08 09:45:00	29.3	0.4	KB90 Fahrwasser I.Libitz w.	2004-10-28 17:00:00	39.9	KB90 Fahrwasser I.Libitz w.	2004-10-04 09:30:00	1.12	KB90 Fahrwasser I.Libitz w.	2004-05-17 09:30:00	7.6	1.5
WB3 Walfisch n.	2010-07-14 08:22:00	35.43	WB3 Walfisch n.	2010-08-19 09:04:00	2.7	WB3 Walfisch n.	2015-03-11 08:14:00	30.6	1.5	SH2 Tessmannsdorf nw.	2018-09-27 08:16:00	31.8	SH2 Tessmannsdorf nw.	2018-06-20 09:03:00	2.14	SH2 Tessmannsdorf nw.	2018-10-10 10:20:00	0.8	4.2	UW4 Warnowwerft	2007-03-21 09:36:00	88.16	UW4 Warnowwerft	2007-02-06 10:05:00	1.55	UW4 Warnowwerft	2012-07-03 09:24:00	1.6	1.8	DB2 Sundische Wiese	2015-05-06 10:00:00	83.99	DB2 Sundische Wiese	2015-04-08 09:15:00	2.04	DB2 Sundische Wiese	2015-07-13 09:15:00	15.4	0.6	KB90 Fahrwasser I.Libitz w.	2004-11-29 08:30:00	40.7	KB90 Fahrwasser I.Libitz w.	2004-10-28 17:00:00	1.18	KB90 Fahrwasser I.Libitz w.	2004-06-14 09:14:00	20.8	1
WB3 Walfisch n.	2010-08-19 09:04:00	36.3	WB3 Walfisch n.	2010-10-20 08:22:05	0.62	WB3 Walfisch n.	2015-04-23 08:01:00	2.1	4	SH2 Tessmannsdorf nw.	2018-10-10 10:20:00	30.21	SH2 Tessmannsdorf nw.	2018-07-04 08:28:00	0.9	SH2 Tessmannsdorf nw.	2018-11-14 08:33:00	3.1	3.9	UW4 Warnowwerft	2007-04-17 09:50:00	44.19	UW4 Warnowwerft	2007-03-21 09:36:00	1.08	UW4 Warnowwerft	2012-08-15 15:07:54	3.7	1.8	DB2 Sundische Wiese	2015-06-08 09:45:00	94.01	DB2 Sundische Wiese	2015-05-06 10:00:00	2.43	DB2 Sundische Wiese	2015-08-19 08:10:00	34.2	0.6	KB90 Fahrwasser I.Libitz w.	2004-12-09 13:05:00	36.2	KB90 Fahrwasser I.Libitz w.	2004-11-29 08:30:00	1.06	KB90 Fahrwasser I.Libitz w.	2004-06-24 17:10:00	9.6	0.9
WB3 Walfisch n.	2010-10-20 08:22:05	18.422	WB3 Walfisch n.	2010-11-17 10:13:14	1.022	WB3 Walfisch n.	2015-06-17 08:18:00	1	5.5	SH2 Tessmannsdorf nw.	2018-11-14 08:33:00	26.64	SH2 Tessmannsdorf nw.	2018-08-29 09:31:00	1.66	SH2 Tessmannsdorf nw.	2018-12-19 09:03:00	0.9	4.2	UW4 Warnowwerft	2007-06-25 10:15:00	48.27	UW4 Warnowwerft	2007-04-17 09:50:00	0.98	UW4 Warnowwerft	2012-09-04 10:24:00	6	2	DB2 Sundische Wiese	2015-07-13 09:15:00	67.27	DB2 Sundische Wiese	2015-06-08 09:45:00	2.83	DB2 Sundische Wiese	2015-09-09 09:05:00	21.1	0.7	KB90 Fahrwasser I.Libitz w.	2005-01-12 14:25:00	46.9	KB90 Fahrwasser I.Libitz w.	2004-12-09 13:05:00	1	KB90 Fahrwasser I.Libitz w.	2004-07-06 10:55:00	5.7	1.4
WB3 Walfisch n.	2010-11-17 10:13:14	30.88	WB3 Walfisch n.	2011-01-12 08:41:23	0.982	WB3 Walfisch n.	2015-07-15 08:22:00	4.1	3.5	SH2 Tessmannsdorf nw.	2018-12-19 09:03:00	21.92	SH2 Tessmannsdorf nw.	2018-09-27 08:16:00	1.12					UW4 Warnowwerft	2007-07-31 09:02:00	40.79	UW4 Warnowwerft	2007-06-25 10:15:00	3.62	UW4 Warnowwerft	2012-11-06 09:35:00	2.6	3.5	DB2 Sundische Wiese	2015-08-19 08:10:00	80.34	DB2 Sundische Wiese	2015-07-13 09:15:00	2.02	DB2 Sundische Wiese	2015-10-05 09:35:00	15.6	0.8	KB90 Fahrwasser I.Libitz w.	2005-01-17 08:40:00	47.9	KB90 Fahrwasser I.Libitz w.	2005-01-12 14:25:00	1.14	KB90 Fahrwasser I.Libitz w.	2004-07-19 10:55:00	6.2	1.5
WB3 Walfisch n.	2011-01-12 08:41:23	50.632	WB3 Walfisch n.	2011-02-02 08:36:02	1.144	WB3 Walfisch n.	2015-09-16 08:56:00	2.9	3.5				SH2 Tessmannsdorf nw.	2018-10-10 10:20:00	1.06					UW4 Warnowwerft	2007-08-30 11:14:00	72.67	UW4 Warnowwerft	2007-07-31 09:02:00	1.93	UW4 Warnowwerft	2013-02-18 11:46:00	0.7	3.5	DB2 Sundische Wiese	2015-09-09 09:05:00	76.39	DB2 Sundische Wiese	2015-08-19 08:10:00	2.03	DB2 Sundische Wiese	2015-11-17 10:25:00	42.6	0.6	KB90 Fahrwasser I.Libitz w.	2005-01-31 08:45:00	50.6	KB90 Fahrwasser I.Libitz w.	2005-01-17 08:40:00	1.3	KB90 Fahrwasser I.Libitz w.	2004-08-10 09:15:00	18.5	1.2
WB3 Walfisch n.	2011-02-02 08:36:02	71.68	WB3 Walfisch n.	2011-03-10 08:05:00	0.766	WB3 Walfisch n.	2015-12-16 08:54:00	1.4	5.5				SH2 Tessmannsdorf nw.	2018-11-14 08:33:00	1.47					UW4 Warnowwerft	2007-09-19 09:45:00	45.77	UW4 Warnowwerft	2007-08-30 11:14:00	2.56	UW4 Warnowwerft	2013-04-03 08:25:00	9.8	1.2	DB2 Sundische Wiese	2015-10-05 09:35:00	57.68	DB2 Sundische Wiese	2015-09-09 09:05:00	2	DB2 Sundische Wiese	2015-12-07 09:05:00	71.8	0.3	KB90 Fahrwasser I.Libitz w.	2005-02-16 08:45:00	32.5	KB90 Fahrwasser I.Libitz w.	2005-01-31 08:45:00	1.37	KB90 Fahrwasser I.Libitz w.	2004-08-19 16:20:00	17	1.1
WB3 Walfisch n.	2011-03-10 08:05:00	25.694	WB3 Walfisch n.	2011-04-06 08:24:49	0.519	WB3 Walfisch n.	2016-01-06 09:14:00	0.4	8				SH2 Tessmannsdorf nw.	2018-12-19 09:03:00	0.3					UW4 Warnowwerft	2007-10-08 09:55:00	27.08	UW4 Warnowwerft	2007-09-19 09:45:00	2.41	UW4 Warnowwerft	2013-05-14 09:33:00	6	3	DB2 Sundische Wiese	2015-11-17 10:25:00	79.66	DB2 Sundische Wiese	2015-10-05 09:35:00	1.64	DB2 Sundische Wiese	2016-02-11 12:20:00	34.9	0.6	KB90 Fahrwasser I.Libitz w.	2005-03-21 09:00:00	74.9	KB90 Fahrwasser I.Libitz w.	2005-02-16 08:45:00	1.03	KB90 Fahrwasser I.Libitz w.	2004-09-14 09:00:00	18.8	1.1
WB3 Walfisch n.	2011-04-06 08:24:49	22.921	WB3 Walfisch n.	2011-05-25 08:14:56	0.886	WB3 Walfisch n.	2016-03-08 08:11:00	9.9	3.5											UW4 Warnowwerft	2008-02-21 11:10:00	103.13	UW4 Warnowwerft	2007-10-08 09:55:00	1.35	UW4 Warnowwerft	2013-06-17 10:05:00	7.2	1.5	DB2 Sundische Wiese	2015-12-07 09:05:00	128.56	DB2 Sundische Wiese	2015-11-17 10:25:00	2.27	DB2 Sundische Wiese	2016-03-02 10:00:00	27.1	0.7	KB90 Fahrwasser I.Libitz w.	2005-04-04 08:33:00	68.4	KB90 Fahrwasser I.Libitz w.	2005-03-21 09:00:00	0.95	KB90 Fahrwasser I.Libitz w.	2004-09-22 09:20:00	10.5	0.9
WB3 Walfisch n.	2011-05-25 08:14:56	25.632	WB3 Walfisch n.	2011-06-29 08:15:43	0.931	WB3 Walfisch n.	2016-05-11 08:12:00	0.7	6.5											UW4 Warnowwerft	2008-03-04 13:16:00	69.83	UW4 Warnowwerft	2008-02-21 11:10:00	1.51	UW4 Warnowwerft	2013-07-02 09:30:00	13.6	1.2	DB2 Sundische Wiese	2016-02-11 12:20:00	121.02	DB2 Sundische Wiese	2015-12-07 09:05:00	3.04	DB2 Sundische Wiese	2016-04-13 09:45:00	63.1	0.5	KB90 Fahrwasser I.Libitz w.	2005-04-21 12:15:00	44.7	KB90 Fahrwasser I.Libitz w.	2005-04-04 08:33:00	0.41	KB90 Fahrwasser I.Libitz w.	2004-10-04 09:30:00	13.9	1.3
WB3 Walfisch n.	2011-06-29 08:15:43	24.563	WB3 Walfisch n.	2011-07-13 08:14:25	1.006	WB3 Walfisch n.	2016-06-08 08:16:00	2.2	3											UW4 Warnowwerft	2008-04-22 11:29:00	99.56	UW4 Warnowwerft	2008-03-04 13:16:00	1.75	UW4 Warnowwerft	2013-08-20 11:24:00	13.5	2.4	DB2 Sundische Wiese	2016-03-02 10:00:00	130.6	DB2 Sundische Wiese	2016-02-11 12:20:00	2.08	DB2 Sundische Wiese	2016-05-09 10:00:00	28	0.5	KB90 Fahrwasser I.Libitz w.	2005-04-25 16:55:00	33.8	KB90 Fahrwasser I.Libitz w.	2005-04-21 12:15:00	0.68	KB90 Fahrwasser I.Libitz w.	2004-10-28 17:00:00	15.8	1.7
WB3 Walfisch n.	2011-07-13 08:14:25	26.046	WB3 Walfisch n.	2011-08-25 08:35:03	0.855	WB3 Walfisch n.	2016-08-24 08:09:00	3.1	4.5											UW4 Warnowwerft	2008-05-27 09:00:00	35.15	UW4 Warnowwerft	2008-04-22 11:29:00	1.13	UW4 Warnowwerft	2013-09-10 09:48:00	3.5	2.5	DB2 Sundische Wiese	2016-04-13 09:45:00	114.01	DB2 Sundische Wiese	2016-03-02 10:00:00	2.01	DB2 Sundische Wiese	2016-06-06 10:00:00	25.8	0.4	KB90 Fahrwasser I.Libitz w.	2005-05-17 08:47:00	33.1	KB90 Fahrwasser I.Libitz w.	2005-04-25 16:55:00	0.88	KB90 Fahrwasser I.Libitz w.	2004-11-29 08:30:00	5.6	1.5
WB3 Walfisch n.	2011-08-25 08:35:03	27.856	WB3 Walfisch n.	2011-09-21 08:17:42	0.675	WB3 Walfisch n.	2016-09-14 08:10:00	3.7	3											UW4 Warnowwerft	2008-07-29 09:20:00	26.31	UW4 Warnowwerft	2008-05-27 09:00:00	0.97	UW4 Warnowwerft	2013-10-08 09:38:00	3.1	4.5	DB2 Sundische Wiese	2016-05-09 10:00:00	81.16	DB2 Sundische Wiese	2016-04-13 09:45:00	2.54	DB2 Sundische Wiese	2016-07-04 09:40:00	42.2	0.4	KB90 Fahrwasser I.Libitz w.	2005-06-06 08:43:00	32.1	KB90 Fahrwasser I.Libitz w.	2005-05-17 08:47:00	1.03	KB90 Fahrwasser I.Libitz w.	2004-12-09 13:05:00	8.4	1.2
WB3 Walfisch n.	2011-09-21 08:17:42	23.081	WB3 Walfisch n.	2012-01-18 08:24:00	1.07	WB3 Walfisch n.	2016-11-10 08:10:00	1.1	4.5											UW4 Warnowwerft	2008-08-26 09:18:00	23.45	UW4 Warnowwerft	2008-07-29 09:20:00	1.56	UW4 Warnowwerft	2013-11-12 09:31:00	3.8	3	DB2 Sundische Wiese	2016-06-06 10:00:00	67.33	DB2 Sundische Wiese	2016-05-09 10:00:00	2.34	DB2 Sundische Wiese	2016-08-17 10:00:00	23.1	0.7	KB90 Fahrwasser I.Libitz w.	2005-07-13 14:06:00	53.2	KB90 Fahrwasser I.Libitz w.	2005-06-06 08:43:00	1.09	KB90 Fahrwasser I.Libitz w.	2005-01-12 14:25:00	8.4	1.1
WB3 Walfisch n.	2012-01-18 08:24:00	50.23	WB3 Walfisch n.	2012-03-07 08:12:00	0.7	WB3 Walfisch n.	2016-12-14 08:26:00	2	8											UW4 Warnowwerft	2009-01-20 08:23:00	46.42	UW4 Warnowwerft	2008-08-26 09:18:00	1.82	UW4 Warnowwerft	2013-12-03 10:00:00	2.3	3	DB2 Sundische Wiese	2016-07-04 09:40:00	82.34	DB2 Sundische Wiese	2016-06-06 10:00:00	1.76	DB2 Sundische Wiese	2016-09-06 12:30:00	17	0.7	KB90 Fahrwasser I.Libitz w.	2005-08-17 14:47:00	26.3	KB90 Fahrwasser I.Libitz w.	2005-07-13 14:06:00	2.68	KB90 Fahrwasser I.Libitz w.	2005-01-17 08:40:00	6.8	1.4
WB3 Walfisch n.	2012-03-07 08:12:00	34.68	WB3 Walfisch n.	2012-05-09 08:27:00	0.73	WB3 Walfisch n.	2017-01-18 09:41:00	0.9	4											UW4 Warnowwerft	2009-02-18 13:32:00	61.63	UW4 Warnowwerft	2009-01-20 08:23:00	1.34	UW4 Warnowwerft	2014-01-15 09:39:00	1.4	2	DB2 Sundische Wiese	2016-08-17 10:00:00	73.56	DB2 Sundische Wiese	2016-07-04 09:40:00	1.85	DB2 Sundische Wiese	2016-10-10 09:55:00	15.5	1.3	KB90 Fahrwasser I.Libitz w.	2005-08-23 07:35:00	30.8	KB90 Fahrwasser I.Libitz w.	2005-08-17 14:47:00	0.91	KB90 Fahrwasser I.Libitz w.	2005-01-31 08:45:00	9.2	0.6
WB3 Walfisch n.	2012-05-09 08:27:00	15.45	WB3 Walfisch n.	2012-06-07 08:08:00	0.92	WB3 Walfisch n.	2017-03-29 08:20:00	4.1	3											UW4 Warnowwerft	2009-04-15 09:20:00	39	UW4 Warnowwerft	2009-02-18 13:32:00	1.17	UW4 Warnowwerft	2014-02-25 13:12:00	3	4	DB2 Sundische Wiese	2016-09-06 12:30:00	53.85	DB2 Sundische Wiese	2016-08-17 10:00:00	1.37	DB2 Sundische Wiese	2016-11-07 09:45:00	10.1	1.5	KB90 Fahrwasser I.Libitz w.	2005-09-20 07:40:00	34.6	KB90 Fahrwasser I.Libitz w.	2005-08-23 07:35:00	1.47	KB90 Fahrwasser I.Libitz w.	2005-02-16 08:45:00	5.8	0.7
WB3 Walfisch n.	2012-06-07 08:08:00	16.25	WB3 Walfisch n.	2012-07-04 08:35:00	1.15	WB3 Walfisch n.	2017-04-27 08:10:00	0.5	4.5											UW4 Warnowwerft	2009-06-09 10:12:00	30.12	UW4 Warnowwerft	2009-04-15 09:20:00	0.82	UW4 Warnowwerft	2014-06-03 09:30:00	4.8	2	DB2 Sundische Wiese	2016-10-10 09:55:00	54.01	DB2 Sundische Wiese	2016-09-06 12:30:00	1.37	DB2 Sundische Wiese	2016-12-12 09:40:00	29.9	0.8	KB90 Fahrwasser I.Libitz w.	2005-09-27 15:30:00	33	KB90 Fahrwasser I.Libitz w.	2005-09-20 07:40:00	1.42	KB90 Fahrwasser I.Libitz w.	2005-03-21 09:00:00	20.4	1.2
WB3 Walfisch n.	2012-07-04 08:35:00	19.12	WB3 Walfisch n.	2012-08-15 08:38:04	1.79	WB3 Walfisch n.	2017-05-10 08:09:00	1.2	3.5											UW4 Warnowwerft	2009-07-14 09:27:00	30.74	UW4 Warnowwerft	2009-06-09 10:12:00	1.62	UW4 Warnowwerft	2014-07-15 09:42:00	5.1	4	DB2 Sundische Wiese	2016-11-07 09:45:00	48.33	DB2 Sundische Wiese	2016-10-10 09:55:00	1.31	DB2 Sundische Wiese	2017-03-06 09:20:00	13.6	1.5	KB90 Fahrwasser I.Libitz w.	2005-10-13 14:30:00	38.1	KB90 Fahrwasser I.Libitz w.	2005-09-27 15:30:00	1.38	KB90 Fahrwasser I.Libitz w.	2005-04-04 08:33:00	6.1	2.3
WB3 Walfisch n.	2012-08-15 08:38:04	20.26	WB3 Walfisch n.	2012-09-05 08:24:00	2.11	WB3 Walfisch n.	2017-06-21 08:06:00	2.2	3.5											UW4 Warnowwerft	2009-08-18 11:20:00	25.26	UW4 Warnowwerft	2009-07-14 09:27:00	1.96	UW4 Warnowwerft	2014-09-09 09:28:00	7.7	5	DB2 Sundische Wiese	2016-12-12 09:40:00	82.38	DB2 Sundische Wiese	2016-11-07 09:45:00	1.36	DB2 Sundische Wiese	2017-04-19 08:35:00	6.3	1.8	KB90 Fahrwasser I.Libitz w.	2005-10-24 09:10:00	27.8	KB90 Fahrwasser I.Libitz w.	2005-10-13 14:30:00	1.51	KB90 Fahrwasser I.Libitz w.	2005-04-21 12:15:00	6.7	1.4
WB3 Walfisch n.	2012-09-05 08:24:00	31.16	WB3 Walfisch n.	2013-04-04 08:20:00	0.59	WB3 Walfisch n.	2017-07-13 08:06:00	14	2											UW4 Warnowwerft	2009-09-15 09:36:00	20.87	UW4 Warnowwerft	2009-08-18 11:20:00	1.5	UW4 Warnowwerft	2014-10-22 09:37:00	2.4	4	DB2 Sundische Wiese	2017-03-06 09:20:00	65.02	DB2 Sundische Wiese	2016-12-12 09:40:00	1.87	DB2 Sundische Wiese	2017-05-08 09:40:00	37.3	0.5	KB90 Fahrwasser I.Libitz w.	2005-11-01 17:20:00	32.7	KB90 Fahrwasser I.Libitz w.	2005-10-24 09:10:00	1	KB90 Fahrwasser I.Libitz w.	2005-04-25 16:55:00	8.3	1.5
WB3 Walfisch n.	2013-04-04 08:20:00	24.19	WB3 Walfisch n.	2013-05-15 08:08:00	0.7	WB3 Walfisch n.	2017-08-24 08:11:00	4.7	3.5											UW4 Warnowwerft	2009-10-20 10:00:00	29.85	UW4 Warnowwerft	2009-09-15 09:36:00	1.69	UW4 Warnowwerft	2014-11-12 11:10:00	1.3	3	DB2 Sundische Wiese	2017-04-19 08:35:00	33.7	DB2 Sundische Wiese	2017-03-06 09:20:00	1.31	DB2 Sundische Wiese	2017-06-14 08:30:00	45.3	0.3	KB90 Fahrwasser I.Libitz w.	2005-11-07 08:39:00	30.8	KB90 Fahrwasser I.Libitz w.	2005-11-01 17:20:00	1.38	KB90 Fahrwasser I.Libitz w.	2005-05-17 08:47:00	5.4	1.2
WB3 Walfisch n.	2013-05-15 08:08:00	27.28	WB3 Walfisch n.	2013-06-19 08:07:00	1.24	WB3 Walfisch n.	2017-09-13 08:29:00	1.3	3.5											UW4 Warnowwerft	2010-01-27 09:24:00	64.13	UW4 Warnowwerft	2009-10-20 10:00:00	1.52	UW4 Warnowwerft	2015-02-18 09:37:00	2	4.5	DB2 Sundische Wiese	2017-05-08 09:40:00	79.94	DB2 Sundische Wiese	2017-04-19 08:35:00	0.85	DB2 Sundische Wiese	2017-07-10 09:20:00	26.5	0.5	KB90 Fahrwasser I.Libitz w.	2005-12-19 09:32:00	21.4	KB90 Fahrwasser I.Libitz w.	2005-11-07 08:39:00	1.49	KB90 Fahrwasser I.Libitz w.	2005-06-06 08:43:00	15.8	1.1
WB3 Walfisch n.	2013-06-19 08:07:00	22.78	WB3 Walfisch n.	2013-07-03 08:18:00	1.47	WB3 Walfisch n.	2017-11-08 08:02:00	2.5	4.5											UW4 Warnowwerft	2010-02-24 09:32:00	59.2	UW4 Warnowwerft	2010-01-27 09:24:00	1.59	UW4 Warnowwerft	2015-03-03 12:38:00	1.6	4.5	DB2 Sundische Wiese	2017-06-14 08:30:00	135.25	DB2 Sundische Wiese	2017-05-08 09:40:00	1.96	DB2 Sundische Wiese	2017-08-22 12:00:00	32.7	0.4	KB90 Fahrwasser I.Libitz w.	2006-03-06 09:35:00	42.3	KB90 Fahrwasser I.Libitz w.	2005-12-19 09:32:00	1.89	KB90 Fahrwasser I.Libitz w.	2005-07-13 14:06:00	11.3	0.8
WB3 Walfisch n.	2013-07-03 08:18:00	30.17	WB3 Walfisch n.	2013-08-22 08:08:00	2.55	WB3 Walfisch n.	2018-01-17 08:49:00	0.8	6											UW4 Warnowwerft	2010-03-16 08:33:00	310	UW4 Warnowwerft	2010-02-24 09:32:00	1.52	UW4 Warnowwerft	2015-04-21 11:06:00	4	3	DB2 Sundische Wiese	2017-07-10 09:20:00	78.72	DB2 Sundische Wiese	2017-06-14 08:30:00	4.56	DB2 Sundische Wiese	2017-09-18 13:00:00	13.8	0.8	KB90 Fahrwasser I.Libitz w.	2006-04-03 08:46:00	54.9	KB90 Fahrwasser I.Libitz w.	2006-03-06 09:35:00	0.97	KB90 Fahrwasser I.Libitz w.	2005-08-17 14:47:00	4.2	2
WB3 Walfisch n.	2013-08-22 08:08:00	30.69	WB3 Walfisch n.	2013-09-12 08:35:00	1.5	WB3 Walfisch n.	2018-02-21 08:27:00	1.2	8.5											UW4 Warnowwerft	2010-04-13 10:59:00	129	UW4 Warnowwerft	2010-03-16 08:33:00	1.7	UW4 Warnowwerft	2015-06-16 10:18:00	4.3	2	DB2 Sundische Wiese	2017-08-22 12:00:00	101.91	DB2 Sundische Wiese	2017-07-10 09:20:00	2.17	DB2 Sundische Wiese	2017-10-09 09:30:00	36.3	0.7	KB90 Fahrwasser I.Libitz w.	2006-04-10 09:12:00	68	KB90 Fahrwasser I.Libitz w.	2006-04-03 08:46:00	1.1	KB90 Fahrwasser I.Libitz w.	2005-08-23 07:35:00	12	1.4
WB3 Walfisch n.	2013-09-12 08:35:00	27.87	WB3 Walfisch n.	2013-10-09 08:37:00	0.91	WB3 Walfisch n.	2018-05-16 08:21:00	1.3	4.5											UW4 Warnowwerft	2010-05-19 09:47:00	27.58	UW4 Warnowwerft	2010-04-13 10:59:00	1.08	UW4 Warnowwerft	2015-07-14 09:33:00	15.6	2.6	DB2 Sundische Wiese	2017-09-18 13:00:00	54.1	DB2 Sundische Wiese	2017-08-22 12:00:00	2.41	DB2 Sundische Wiese	2017-11-13 09:15:00	36.6	0.6	KB90 Fahrwasser I.Libitz w.	2006-07-19 08:30:00	40.5	KB90 Fahrwasser I.Libitz w.	2006-04-10 09:12:00	2.1	KB90 Fahrwasser I.Libitz w.	2005-09-20 07:40:00	13.4	1.3
WB3 Walfisch n.	2013-10-09 08:37:00	21.57	WB3 Walfisch n.	2013-11-13 08:27:00	0.82	WB3 Walfisch n.	2018-06-06 08:13:00	4.5	2.5											UW4 Warnowwerft	2010-06-15 09:55:00	36.25	UW4 Warnowwerft	2010-05-19 09:47:00	0.62	UW4 Warnowwerft	2015-09-15 09:54:00	10.3	2.5	DB2 Sundische Wiese	2017-10-09 09:30:00	89.54	DB2 Sundische Wiese	2017-09-18 13:00:00	1.21	DB2 Sundische Wiese	2017-12-04 09:50:00	37.7	0.7	KB90 Fahrwasser I.Libitz w.	2006-08-10 09:00:00	47.7	KB90 Fahrwasser I.Libitz w.	2006-07-19 08:30:00	2.43	KB90 Fahrwasser I.Libitz w.	2005-09-27 15:30:00	10.4	1.5
WB3 Walfisch n.	2013-11-13 08:27:00	25.58	WB3 Walfisch n.	2014-02-27 08:22:00	0.77	WB3 Walfisch n.	2018-07-04 08:09:00	1.8	3.5											UW4 Warnowwerft	2010-07-13 09:36:00	18.52	UW4 Warnowwerft	2010-06-15 09:55:00	1.1	UW4 Warnowwerft	2015-12-15 09:30:00	2.1	4	DB2 Sundische Wiese	2017-11-13 09:15:00	94.41	DB2 Sundische Wiese	2017-10-09 09:30:00	1.78	DB2 Sundische Wiese	2018-01-10 09:50:00	36.7	0.6	KB90 Fahrwasser I.Libitz w.	2006-09-13 08:52:00	40.2	KB90 Fahrwasser I.Libitz w.	2006-08-10 09:00:00	2.49	KB90 Fahrwasser I.Libitz w.	2005-10-13 14:30:00	10.8	1.8
WB3 Walfisch n.	2014-02-27 08:22:00	29.12	WB3 Walfisch n.	2014-06-04 08:25:00	0.68	WB3 Walfisch n.	2018-09-05 08:17:00	4.8	3.5											UW4 Warnowwerft	2010-08-17 10:50:00	27.5	UW4 Warnowwerft	2010-07-13 09:36:00	0.73	UW4 Warnowwerft	2016-01-05 09:37:00	0.8	5	DB2 Sundische Wiese	2017-12-04 09:50:00	110.6	DB2 Sundische Wiese	2017-11-13 09:15:00	1.85	DB2 Sundische Wiese	2018-03-26 09:30:00	39.7	0.5	KB90 Fahrwasser I.Libitz w.	2006-09-18 08:40:00	39.1	KB90 Fahrwasser I.Libitz w.	2006-09-13 08:52:00	1.82	KB90 Fahrwasser I.Libitz w.	2005-10-24 09:10:00	11.1	1.5
WB3 Walfisch n.	2014-06-04 08:25:00	20.73	WB3 Walfisch n.	2014-07-17 08:29:00	1.63	WB3 Walfisch n.	2018-11-14 08:14:00	2.5	4.5											UW4 Warnowwerft	2010-11-16 11:43:54	209.68	UW4 Warnowwerft	2010-08-17 10:50:00	1.44	UW4 Warnowwerft	2016-03-07 10:31:00	7.5	2.5	DB2 Sundische Wiese	2018-01-10 09:50:00	174.94	DB2 Sundische Wiese	2017-12-04 09:50:00	1.74	DB2 Sundische Wiese	2018-04-16 09:30:00	73.5	0.5	KB90 Fahrwasser I.Libitz w.	2006-10-09 09:05:00	37.8	KB90 Fahrwasser I.Libitz w.	2006-09-18 08:40:00	1.76	KB90 Fahrwasser I.Libitz w.	2005-11-01 17:20:00	9.6
WB3 Walfisch n.	2014-07-17 08:29:00	30.94	WB3 Walfisch n.	2014-09-10 08:19:00	0.76	WB5 Innenreede w.	1990-01-30 11:01:00	0.9	5.2											UW4 Warnowwerft	2010-12-14 10:58:35	130.12	UW4 Warnowwerft	2010-11-16 11:43:54	3.904	UW4 Warnowwerft	2016-04-19 09:30:00	2.6	4	DB2 Sundische Wiese	2018-03-26 09:30:00	245.92	DB2 Sundische Wiese	2018-01-10 09:50:00	2.65	DB2 Sundische Wiese	2018-05-07 09:20:00	79	0.4	KB90 Fahrwasser I.Libitz w.	2006-11-20 08:20:00	27.1	KB90 Fahrwasser I.Libitz w.	2006-10-09 09:05:00	1.55	KB90 Fahrwasser I.Libitz w.	2005-11-07 08:39:00	8.3	2.5
WB3 Walfisch n.	2014-09-10 08:19:00	20.57	WB3 Walfisch n.	2014-10-23 08:44:00	0.92	WB5 Innenreede w.	1990-02-19 12:10:00	0.8	6.8											UW4 Warnowwerft	2011-01-12 13:00:31	191.411	UW4 Warnowwerft	2010-12-14 10:58:35	1.778	UW4 Warnowwerft	2016-05-10 10:15:00	4.5	2.6	DB2 Sundische Wiese	2018-04-16 09:30:00	232.17	DB2 Sundische Wiese	2018-03-26 09:30:00	2.57	DB2 Sundische Wiese	2018-06-06 10:00:00	61.2	0.3	KB90 Fahrwasser I.Libitz w.	2006-12-04 08:35:00	26	KB90 Fahrwasser I.Libitz w.	2006-11-20 08:20:00	0.66	KB90 Fahrwasser I.Libitz w.	2005-12-19 09:32:00	2.7	2
WB3 Walfisch n.	2014-10-23 08:44:00	21.82	WB3 Walfisch n.	2014-11-10 10:46:00	1.34	WB5 Innenreede w.	1990-03-27 13:36:00	2.9	6.5											UW4 Warnowwerft	2011-02-02 13:04:47	169.192	UW4 Warnowwerft	2011-01-12 13:00:31	2.172	UW4 Warnowwerft	2016-06-07 09:40:00	13.8	1.4	DB2 Sundische Wiese	2018-05-07 09:20:00	121.53	DB2 Sundische Wiese	2018-04-16 09:30:00	2.62	DB2 Sundische Wiese	2018-07-09 09:45:00	28.4	0.6	KB90 Fahrwasser I.Libitz w.	2007-01-16 08:42:00	41.44	KB90 Fahrwasser I.Libitz w.	2006-12-04 08:35:00	0.97	KB90 Fahrwasser I.Libitz w.	2006-03-06 09:35:00	16.3	2
WB3 Walfisch n.	2014-11-10 10:46:00	23.27	WB3 Walfisch n.	2015-02-19 08:15:00	1.39	WB5 Innenreede w.	1990-04-17 11:58:00	2	4.5											UW4 Warnowwerft	2011-03-09 08:31:25	108.2	UW4 Warnowwerft	2011-02-02 13:04:47	1.72	UW4 Warnowwerft	2016-07-19 09:23:00	13.9	2	DB2 Sundische Wiese	2018-06-06 10:00:00	124.19	DB2 Sundische Wiese	2018-05-07 09:20:00	1.78	DB2 Sundische Wiese	2018-08-21 09:20:00	58.6	0.5	KB90 Fahrwasser I.Libitz w.	2007-01-29 10:32:00	33.5	KB90 Fahrwasser I.Libitz w.	2007-01-16 08:42:00	1.45	KB90 Fahrwasser I.Libitz w.	2006-04-03 08:46:00	22.7	1.3
WB3 Walfisch n.	2015-02-19 08:15:00	33.26	WB3 Walfisch n.	2015-03-11 08:14:00	1.62	WB5 Innenreede w.	1990-05-22 11:58:00	1.1	5.5											UW4 Warnowwerft	2011-04-06 12:47:58	62.229	UW4 Warnowwerft	2011-03-09 08:31:25	1.49	UW4 Warnowwerft	2016-08-23 09:21:00	4.1	3.5	DB2 Sundische Wiese	2018-07-09 09:45:00	42.59	DB2 Sundische Wiese	2018-06-06 10:00:00	2.78	DB2 Sundische Wiese	2018-09-03 09:25:00	40.5	0.5	KB90 Fahrwasser I.Libitz w.	2007-02-12 08:50:00	46.22	KB90 Fahrwasser I.Libitz w.	2007-01-29 10:32:00	0.93	KB90 Fahrwasser I.Libitz w.	2006-04-10 09:12:00	16.1	1
WB3 Walfisch n.	2015-03-11 08:14:00	27.65	WB3 Walfisch n.	2015-04-23 08:01:00	0.64	WB5 Innenreede w.	1990-07-30 12:15:00	1.7	3.5											UW4 Warnowwerft	2011-05-24 09:07:36	29.132	UW4 Warnowwerft	2011-04-06 12:47:58	1.001	UW4 Warnowwerft	2016-09-13 09:19:00	12.7	1.5	DB2 Sundische Wiese	2018-08-21 09:20:00	143.89	DB2 Sundische Wiese	2018-07-09 09:45:00	1.06	DB2 Sundische Wiese	2018-10-11 10:40:00	30.7	0.8	KB90 Fahrwasser I.Libitz w.	2007-03-07 09:00:00	57.53	KB90 Fahrwasser I.Libitz w.	2007-02-12 08:50:00	1.25	KB90 Fahrwasser I.Libitz w.	2006-07-19 08:30:00	8.6	0.8
WB3 Walfisch n.	2015-04-23 08:01:00	21.34	WB3 Walfisch n.	2015-06-17 08:18:00	0.66	WB5 Innenreede w.	1990-08-27 11:46:00	2.8	5.2											UW4 Warnowwerft	2011-06-28 09:29:23	54.462	UW4 Warnowwerft	2011-05-24 09:07:36	0.811	UW4 Warnowwerft	2016-11-09 09:19:00	6.8	3	DB2 Sundische Wiese	2018-09-03 09:25:00	81.42	DB2 Sundische Wiese	2018-08-21 09:20:00	3	DB2 Sundische Wiese	2018-11-21 09:40:00	11.1	0.9	KB90 Fahrwasser I.Libitz w.	2007-03-14 16:26:00	64.45	KB90 Fahrwasser I.Libitz w.	2007-03-07 09:00:00	1.79	KB90 Fahrwasser I.Libitz w.	2006-08-10 09:00:00	8.5	0.7
WB3 Walfisch n.	2015-06-17 08:18:00	20.63	WB3 Walfisch n.	2015-07-15 08:22:00	1.16	WB5 Innenreede w.	1990-09-24 10:55:00	0.6	6.8											UW4 Warnowwerft	2011-07-12 09:41:26	45.695	UW4 Warnowwerft	2011-06-28 09:29:23	3.256	UW4 Warnowwerft	2016-12-13 09:21:00	4.3	3	DB2 Sundische Wiese	2018-10-11 10:40:00	57.82	DB2 Sundische Wiese	2018-09-03 09:25:00	1.9	DB2 Sundische Wiese	2018-12-05 11:25:00	24.8	0.7	KB90 Fahrwasser I.Libitz w.	2007-04-24 08:35:00	29.72	KB90 Fahrwasser I.Libitz w.	2007-03-14 16:26:00	0.85	KB90 Fahrwasser I.Libitz w.	2006-09-13 08:52:00	9.7	1.5
WB3 Walfisch n.	2015-07-15 08:22:00	26.39	WB3 Walfisch n.	2015-09-16 08:56:00	1.39	WB5 Innenreede w.	1990-11-27 12:40:00	0.7	4.5											UW4 Warnowwerft	2011-08-23 09:59:46	108.46	UW4 Warnowwerft	2011-07-12 09:41:26	1.854	UW4 Warnowwerft	2017-01-17 09:28:00	0.9	3.5	DB2 Sundische Wiese	2018-11-21 09:40:00	78.24	DB2 Sundische Wiese	2018-10-11 10:40:00	1.52	DB6 Barth oe.	1990-02-01 09:30:00	61.2	0.4	KB90 Fahrwasser I.Libitz w.	2007-05-02 08:17:00	31.97	KB90 Fahrwasser I.Libitz w.	2007-04-24 08:35:00	1.27	KB90 Fahrwasser I.Libitz w.	2006-09-18 08:40:00	15.3	1.5
WB3 Walfisch n.	2015-09-16 08:56:00	27.86	WB3 Walfisch n.	2015-12-16 08:54:00	1.33	WB5 Innenreede w.	1990-12-18 11:56:00	1	5											UW4 Warnowwerft	2011-09-19 09:26:52	69.009	UW4 Warnowwerft	2011-08-23 09:59:46	3.133	UW4 Warnowwerft	2017-03-28 09:32:00	11.8	1.7	DB2 Sundische Wiese	2018-12-05 11:25:00	119.61	DB2 Sundische Wiese	2018-11-21 09:40:00	1.34	DB6 Barth oe.	1990-03-01 09:44:00	239.6	0.1	KB90 Fahrwasser I.Libitz w.	2007-07-04 09:40:00	40.37	KB90 Fahrwasser I.Libitz w.	2007-05-02 08:17:00	1.09	KB90 Fahrwasser I.Libitz w.	2006-10-09 09:05:00	16.7	1.4
WB3 Walfisch n.	2015-12-16 08:54:00	32.63	WB3 Walfisch n.	2016-01-06 09:14:00	1.11	WB5 Innenreede w.	1991-01-22 13:28:00	0.3												UW4 Warnowwerft	2012-01-17 09:52:00	145.89	UW4 Warnowwerft	2011-09-19 09:26:52	2.303	UW4 Warnowwerft	2017-04-26 09:34:00	4.8	2	DB6 Barth oe.	1990-01-02 08:44:00	309.3	DB2 Sundische Wiese	2018-12-05 11:25:00	1.96	DB6 Barth oe.	1990-04-02 08:00:00	116.1	0.5	KB90 Fahrwasser I.Libitz w.	2007-09-20 08:30:00	21.26	KB90 Fahrwasser I.Libitz w.	2007-07-04 09:40:00	2.25	KB90 Fahrwasser I.Libitz w.	2006-11-20 08:20:00	5.8	2
WB3 Walfisch n.	2016-01-06 09:14:00	21.23	WB3 Walfisch n.	2016-03-08 08:11:00	0.72	WB5 Innenreede w.	1991-02-28 13:12:00	1.4	6											UW4 Warnowwerft	2012-03-08 10:06:00	63.41	UW4 Warnowwerft	2012-01-17 09:52:00	1.78	UW4 Warnowwerft	2017-05-09 09:48:00	11.2	2.5	DB6 Barth oe.	1990-01-02 08:44:00	225.2	DB6 Barth oe.	1990-01-02 08:44:00	1.41	DB6 Barth oe.	1990-05-07 08:15:00	47.6	0.5	KB90 Fahrwasser I.Libitz w.	2007-10-15 09:46:00	25.75	KB90 Fahrwasser I.Libitz w.	2007-09-20 08:30:00	1.04	KB90 Fahrwasser I.Libitz w.	2006-12-04 08:35:00	6.2	2.4
WB3 Walfisch n.	2016-03-08 08:11:00	24.34	WB3 Walfisch n.	2016-05-11 08:12:00	0.55	WB5 Innenreede w.	1991-03-12 13:30:00	10.3	3.2											UW4 Warnowwerft	2012-05-08 09:34:00	17.77	UW4 Warnowwerft	2012-03-08 10:06:00	1.3	UW4 Warnowwerft	2017-06-20 09:39:00	36.9	1.5	DB6 Barth oe.	1990-02-01 09:30:00	101.4	DB6 Barth oe.	1990-01-02 08:44:00	4.79	DB6 Barth oe.	1990-06-05 08:30:00	33.2	0.55	KB90 Fahrwasser I.Libitz w.	2007-11-19 08:15:00	24.93	KB90 Fahrwasser I.Libitz w.	2007-10-15 09:46:00	1.64	KB90 Fahrwasser I.Libitz w.	2007-01-16 08:42:00	9.2	1.5
WB3 Walfisch n.	2016-05-11 08:12:00	22.8	WB3 Walfisch n.	2016-06-08 08:16:00	0.9	WB5 Innenreede w.	1991-05-13 13:38:00	1.2	6.5											UW4 Warnowwerft	2012-06-06 09:21:00	22.32	UW4 Warnowwerft	2012-05-08 09:34:00	0.84	UW4 Warnowwerft	2017-07-12 09:22:00	31	1.5	DB6 Barth oe.	1990-02-01 09:30:00	101.4	DB6 Barth oe.	1990-02-01 09:30:00	5.27	DB6 Barth oe.	1990-07-02 08:20:00	71.4	0.4	KB90 Fahrwasser I.Libitz w.	2008-01-14 08:42:00	17.62	KB90 Fahrwasser I.Libitz w.	2007-11-19 08:15:00	1.45	KB90 Fahrwasser I.Libitz w.	2007-01-29 10:32:00	6.7	0.9
WB3 Walfisch n.	2016-06-08 08:16:00	24.43	WB3 Walfisch n.	2016-08-24 08:09:00	1.53	WB5 Innenreede w.	1991-06-11 14:53:00	1.2	6											UW4 Warnowwerft	2012-07-03 09:24:00	39.96	UW4 Warnowwerft	2012-06-06 09:21:00	1.22	UW4 Warnowwerft	2017-08-23 09:22:00	4.9	2.3	DB6 Barth oe.	1990-03-01 09:44:00	189.3	DB6 Barth oe.	1990-02-01 09:30:00	1.18	DB6 Barth oe.	1990-08-07 09:17:00	66.9	0.6	KB90 Fahrwasser I.Libitz w.	2008-01-29 08:30:00	64.96	KB90 Fahrwasser I.Libitz w.	2008-01-14 08:42:00	0.7	KB90 Fahrwasser I.Libitz w.	2007-02-12 08:50:00	5.9	1.2
WB3 Walfisch n.	2016-08-24 08:09:00	27.63	WB3 Walfisch n.	2016-09-14 08:10:00	1.59	WB5 Innenreede w.	1991-07-09 13:50:00	4	3.5											UW4 Warnowwerft	2012-08-15 15:07:54	20.8	UW4 Warnowwerft	2012-07-03 09:24:00	2.61	UW4 Warnowwerft	2017-09-12 09:32:00	3	2.5	DB6 Barth oe.	1990-03-01 09:44:00	72.9	DB6 Barth oe.	1990-03-01 09:44:00	19.04	DB6 Barth oe.	1990-09-04 10:04:00	48.5	0.5	KB90 Fahrwasser I.Libitz w.	2008-02-19 08:21:00	42.85	KB90 Fahrwasser I.Libitz w.	2008-01-29 08:30:00	0.83	KB90 Fahrwasser I.Libitz w.	2007-03-07 09:00:00	2.3	2
WB3 Walfisch n.	2016-09-14 08:10:00	24.4	WB3 Walfisch n.	2016-11-10 08:10:00	0.93	WB5 Innenreede w.	1991-08-08 13:30:00	3.7	4											UW4 Warnowwerft	2012-09-04 10:24:00	25.66	UW4 Warnowwerft	2012-08-15 15:07:54	1.84	UW4 Warnowwerft	2017-11-07 09:43:00	2.1	3.5	DB6 Barth oe.	1990-04-02 08:00:00	135.6	DB6 Barth oe.	1990-03-01 09:44:00	1.27	DB6 Barth oe.	1990-10-09 09:22:00	83.3	0.5	KB90 Fahrwasser I.Libitz w.	2008-03-27 17:27:00	49.4	KB90 Fahrwasser I.Libitz w.	2008-02-19 08:21:00	0.78	KB90 Fahrwasser I.Libitz w.	2007-03-14 16:26:00	10.8	1.8
WB3 Walfisch n.	2016-11-10 08:10:00	25.26	WB3 Walfisch n.	2016-12-14 08:26:00	0.83	WB5 Innenreede w.	1991-09-25 14:17:00	1.8	7											UW4 Warnowwerft	2012-11-06 09:35:00	30.08	UW4 Warnowwerft	2012-09-04 10:24:00	1.88	UW4 Warnowwerft	2018-01-16 09:51:00	1.9	1.7	DB6 Barth oe.	1990-04-02 08:00:00	104.1	DB6 Barth oe.	1990-04-02 08:00:00	3.54	DB6 Barth oe.	1990-11-01 08:50:00	108.7	0.35	KB90 Fahrwasser I.Libitz w.	2008-04-14 14:08:00	92.27	KB90 Fahrwasser I.Libitz w.	2008-03-27 17:27:00	0.77	KB90 Fahrwasser I.Libitz w.	2007-04-24 08:35:00	10	2
WB3 Walfisch n.	2016-12-14 08:26:00	23.49	WB3 Walfisch n.	2017-01-18 09:41:00	1	WB5 Innenreede w.	1991-10-23 13:23:00	0.7	8											UW4 Warnowwerft	2013-02-18 11:46:00	37.29	UW4 Warnowwerft	2012-11-06 09:35:00	1.98	UW4 Warnowwerft	2018-02-20 09:12:00	3.7	3	DB6 Barth oe.	1990-05-07 08:15:00	133.1	DB6 Barth oe.	1990-04-02 08:00:00	1.75	DB6 Barth oe.	1990-12-04 08:40:00	93.7	0.5	KB90 Fahrwasser I.Libitz w.	2008-05-05 14:04:00	58.4	KB90 Fahrwasser I.Libitz w.	2008-04-14 14:08:00	1.36	KB90 Fahrwasser I.Libitz w.	2007-05-02 08:17:00	6.9	1.8
WB3 Walfisch n.	2017-01-18 09:41:00	31.89	WB3 Walfisch n.	2017-03-29 08:20:00	1.74	WB5 Innenreede w.	1991-12-12 15:50:00	0.8												UW4 Warnowwerft	2013-04-03 08:25:00	116.97	UW4 Warnowwerft	2013-02-18 11:46:00	1.53	UW4 Warnowwerft	2018-04-10 09:41:00	5.5	1.5	DB6 Barth oe.	1990-05-07 08:15:00	85.1	DB6 Barth oe.	1990-05-07 08:15:00	5	DB6 Barth oe.	1991-01-03 09:15:00	154.8	0.4	KB90 Fahrwasser I.Libitz w.	2008-05-19 08:11:00	56.74	KB90 Fahrwasser I.Libitz w.	2008-05-05 14:04:00	0.85	KB90 Fahrwasser I.Libitz w.	2007-07-04 09:40:00	19.2	0.8
WB3 Walfisch n.	2017-03-29 08:20:00	25.59	WB3 Walfisch n.	2017-04-27 08:10:00	1.09	WB5 Innenreede w.	1992-02-11 12:01:00	0.5	5.1											UW4 Warnowwerft	2013-05-14 09:33:00	42.21	UW4 Warnowwerft	2013-04-03 08:25:00	1.23	UW4 Warnowwerft	2018-05-15 09:42:00	14.8	1.5	DB6 Barth oe.	1990-06-05 08:30:00	261	DB6 Barth oe.	1990-05-07 08:15:00	1.28	DB6 Barth oe.	1991-03-21 08:28:00	147.1	0.6	KB90 Fahrwasser I.Libitz w.	2008-06-04 10:26:00	44.13	KB90 Fahrwasser I.Libitz w.	2008-05-19 08:11:00	1.41	KB90 Fahrwasser I.Libitz w.	2007-09-20 08:30:00	3.6	2
WB3 Walfisch n.	2017-04-27 08:10:00	25.79	WB3 Walfisch n.	2017-05-10 08:09:00	0.77	WB5 Innenreede w.	1992-03-10 13:32:00	4.2	7.2											UW4 Warnowwerft	2013-06-17 10:05:00	67.77	UW4 Warnowwerft	2013-05-14 09:33:00	0.68	UW4 Warnowwerft	2018-06-05 09:33:00	2.6	2.5	DB6 Barth oe.	1990-06-05 08:30:00	97.7	DB6 Barth oe.	1990-06-05 08:30:00	9.17	DB6 Barth oe.	1991-04-08 08:41:00	97.8	0.6	KB90 Fahrwasser I.Libitz w.	2008-07-07 08:35:00	67	KB90 Fahrwasser I.Libitz w.	2008-06-04 10:26:00	0.87	KB90 Fahrwasser I.Libitz w.	2007-10-15 09:46:00	6.8	2
WB3 Walfisch n.	2017-05-10 08:09:00	25.46	WB3 Walfisch n.	2017-06-21 08:06:00	1.15	WB5 Innenreede w.	1992-05-12 11:32:00	0.7	5.2											UW4 Warnowwerft	2013-07-02 09:30:00	68.5	UW4 Warnowwerft	2013-06-17 10:05:00	2.22	UW4 Warnowwerft	2018-07-03 09:44:00	3.7	3.5	DB6 Barth oe.	1990-07-02 08:20:00	151.5	DB6 Barth oe.	1990-06-05 08:30:00	1.92	DB6 Barth oe.	1991-05-21 08:50:00	142.2	0.3	KB90 Fahrwasser I.Libitz w.	2008-07-28 08:23:00	65.1	KB90 Fahrwasser I.Libitz w.	2008-07-07 08:35:00	1.22	KB90 Fahrwasser I.Libitz w.	2007-11-19 08:15:00	2.7	2.5
WB3 Walfisch n.	2017-06-21 08:06:00	25.53	WB3 Walfisch n.	2017-07-13 08:06:00	1.17	WB5 Innenreede w.	1992-06-11 13:06:00	1	4.2											UW4 Warnowwerft	2013-08-20 11:24:00	25.05	UW4 Warnowwerft	2013-07-02 09:30:00	2.14	UW4 Warnowwerft	2018-09-04 09:40:00	11.1	2.5	DB6 Barth oe.	1990-07-02 08:20:00	82.1	DB6 Barth oe.	1990-07-02 08:20:00	6.26	DB6 Barth oe.	1991-06-05 08:15:00	89.9	0.25	KB90 Fahrwasser I.Libitz w.	2008-08-18 08:25:00	40.46	KB90 Fahrwasser I.Libitz w.	2008-07-28 08:23:00	2.22	KB90 Fahrwasser I.Libitz w.	2007-12-10 08:35:00	3.3	1.6
WB3 Walfisch n.	2017-07-13 08:06:00	30.62	WB3 Walfisch n.	2017-08-24 08:11:00	1.43	WB5 Innenreede w.	1992-07-21 14:15:00	2.9	3.1											UW4 Warnowwerft	2013-09-10 09:48:00	26.37	UW4 Warnowwerft	2013-08-20 11:24:00	1.79	UW4 Warnowwerft	2018-11-13 09:25:00	1.9	5	DB6 Barth oe.	1990-08-07 09:17:00	237.6	DB6 Barth oe.	1990-07-02 08:20:00	1.83	DB6 Barth oe.	1991-07-03 09:00:00	83	0.4	KB90 Fahrwasser I.Libitz w.	2008-08-25 08:25:00	54.97	KB90 Fahrwasser I.Libitz w.	2008-08-18 08:25:00	3.43	KB90 Fahrwasser I.Libitz w.	2007-12-17 08:35:00	4.4	2.5
WB3 Walfisch n.	2017-08-24 08:11:00	29.28	WB3 Walfisch n.	2017-09-13 08:29:00	2.57	WB5 Innenreede w.	1992-09-21 12:26:00	2.6	5.1											UW4 Warnowwerft	2013-10-08 09:38:00	21.12	UW4 Warnowwerft	2013-09-10 09:48:00	1.4					DB6 Barth oe.	1990-08-07 09:17:00	101.5	DB6 Barth oe.	1990-08-07 09:17:00	6.27	DB6 Barth oe.	1991-08-14 10:40:00	62.9	0.4	KB90 Fahrwasser I.Libitz w.	2008-10-06 08:34:00	12.67	KB90 Fahrwasser I.Libitz w.	2008-08-25 08:25:00	1.96	KB90 Fahrwasser I.Libitz w.	2008-01-14 08:42:00	5.9	1.8
WB3 Walfisch n.	2017-09-13 08:29:00	32.16	WB3 Walfisch n.	2017-11-08 08:02:00	0.86	WB5 Innenreede w.	1992-10-19 14:10:00	2.4	5.2											UW4 Warnowwerft	2013-11-12 09:31:00	46.34	UW4 Warnowwerft	2013-10-08 09:38:00	0.7					DB6 Barth oe.	1990-09-04 10:04:00	117.9	DB6 Barth oe.	1990-08-07 09:17:00	2.67	DB6 Barth oe.	1991-10-14 10:51:00	42.6	0.8	KB90 Fahrwasser I.Libitz w.	2008-11-04 08:32:00	45.15	KB90 Fahrwasser I.Libitz w.	2008-10-06 08:34:00	0.48	KB90 Fahrwasser I.Libitz w.	2008-01-29 08:30:00	8.9	1
WB3 Walfisch n.	2017-11-08 08:02:00	34.71	WB3 Walfisch n.	2018-01-17 08:49:00	1.13	WB5 Innenreede w.	1992-11-10 13:44:00	1.4	7.1											UW4 Warnowwerft	2013-12-03 10:00:00	37.31	UW4 Warnowwerft	2013-11-12 09:31:00	1.38					DB6 Barth oe.	1990-09-04 10:04:00	84.6	DB6 Barth oe.	1990-09-04 10:04:00	2.71	DB6 Barth oe.	1992-02-17 10:23:00	92.6	0.25	KB90 Fahrwasser I.Libitz w.	2008-11-13 09:25:00	13.58	KB90 Fahrwasser I.Libitz w.	2008-11-04 08:32:00	0.88	KB90 Fahrwasser I.Libitz w.	2008-02-19 08:21:00	7.2	1.6
WB3 Walfisch n.	2018-01-17 08:49:00	45.29	WB3 Walfisch n.	2018-02-21 08:27:00	0.81	WB5 Innenreede w.	1992-12-02 11:20:00	1.5	4.2											UW4 Warnowwerft	2014-01-15 09:39:00	89.66	UW4 Warnowwerft	2013-12-03 10:00:00	1.2					DB6 Barth oe.	1990-10-09 09:22:00	106.7	DB6 Barth oe.	1990-09-04 10:04:00	5.24	DB6 Barth oe.	1992-05-14 13:04:00	72.6	0.5	KB90 Fahrwasser I.Libitz w.	2009-01-29 08:53:00	56.2	KB90 Fahrwasser I.Libitz w.	2008-11-13 09:25:00	0.88	KB90 Fahrwasser I.Libitz w.	2008-03-27 17:27:00	8.7	1.8
WB3 Walfisch n.	2018-02-21 08:27:00	47.31	WB3 Walfisch n.	2018-05-16 08:21:00	0.7	WB5 Innenreede w.	1993-02-16 12:07:00	0.1	9											UW4 Warnowwerft	2014-02-25 13:12:00	51.54	UW4 Warnowwerft	2014-01-15 09:39:00	1.51					DB6 Barth oe.	1990-10-09 09:22:00	172.7	DB6 Barth oe.	1990-10-09 09:22:00	2.6	DB6 Barth oe.	1992-07-14 10:14:00	56.4	0.35	KB90 Fahrwasser I.Libitz w.	2009-02-09 08:33:00	56.89	KB90 Fahrwasser I.Libitz w.	2009-01-29 08:53:00	0.84	KB90 Fahrwasser I.Libitz w.	2008-04-14 14:08:00	5.9	2.7
WB3 Walfisch n.	2018-05-16 08:21:00	23.54	WB3 Walfisch n.	2018-06-06 08:13:00	1.62	WB5 Innenreede w.	1993-03-16 12:35:00	12.4	4.9											UW4 Warnowwerft	2014-06-03 09:30:00	21.05	UW4 Warnowwerft	2014-02-25 13:12:00	0.75					DB6 Barth oe.	1990-11-01 08:50:00	162.9	DB6 Barth oe.	1990-10-09 09:22:00	5.91	DB6 Barth oe.	1992-11-05 10:35:00	40.9	0.5	KB90 Fahrwasser I.Libitz w.	2009-03-09 08:29:00	104.44	KB90 Fahrwasser I.Libitz w.	2009-02-09 08:33:00	0.88	KB90 Fahrwasser I.Libitz w.	2008-05-05 14:04:00	15.8	1.5
WB3 Walfisch n.	2018-06-06 08:13:00	28.47	WB3 Walfisch n.	2018-07-04 08:09:00	0.81	WB5 Innenreede w.	1993-05-25 13:10:00	1.1	6											UW4 Warnowwerft	2014-07-15 09:42:00	24.83	UW4 Warnowwerft	2014-06-03 09:30:00	0.81					DB6 Barth oe.	1990-11-01 08:50:00	101.9	DB6 Barth oe.	1990-11-01 08:50:00	5.29	DB6 Barth oe.	1993-02-10 10:52:00	24.2	1	KB90 Fahrwasser I.Libitz w.	2009-04-20 08:45:00	34.73	KB90 Fahrwasser I.Libitz w.	2009-03-09 08:29:00	0.56	KB90 Fahrwasser I.Libitz w.	2008-05-19 08:11:00	16.8	1.2
WB3 Walfisch n.	2018-07-04 08:09:00	14.92	WB3 Walfisch n.	2018-09-05 08:17:00	2.23	WB5 Innenreede w.	1993-07-20 12:20:00	3.8	4											UW4 Warnowwerft	2014-09-09 09:28:00	21.35	UW4 Warnowwerft	2014-07-15 09:42:00	1.19					DB6 Barth oe.	1990-12-04 08:40:00	160	DB6 Barth oe.	1990-11-01 08:50:00	2.3	DB6 Barth oe.	1993-03-01 10:37:00	53.1	0.35	KB90 Fahrwasser I.Libitz w.	2009-05-25 09:05:00	105.99	KB90 Fahrwasser I.Libitz w.	2009-04-20 08:45:00	0.52	KB90 Fahrwasser I.Libitz w.	2008-06-04 10:26:00	16.8	1.4
WB3 Walfisch n.	2018-09-05 08:17:00	29.07	WB3 Walfisch n.	2018-11-14 08:14:00	1.76	WB5 Innenreede w.	1993-08-10 15:57:00	4.3	4											UW4 Warnowwerft	2014-10-22 09:37:00	29.76	UW4 Warnowwerft	2014-09-09 09:28:00	1.46					DB6 Barth oe.	1990-12-04 08:40:00	128.8	DB6 Barth oe.	1990-12-04 08:40:00	1.23	DB6 Barth oe.	1993-03-29 10:21:00	21.5	1.4	KB90 Fahrwasser I.Libitz w.	2009-06-18 11:16:00	205.06	KB90 Fahrwasser I.Libitz w.	2009-05-25 09:05:00	1.01	KB90 Fahrwasser I.Libitz w.	2008-07-07 08:35:00	13.7	0.8
WB3 Walfisch n.	2018-11-14 08:14:00	19.76	WB5 Innenreede w.	1990-01-30 11:01:00	1.72	WB5 Innenreede w.	1993-09-15 15:28:00	5.5	5											UW4 Warnowwerft	2014-11-12 11:10:00	39.49	UW4 Warnowwerft	2014-10-22 09:37:00	1.48					DB6 Barth oe.	1991-01-03 09:15:00	150.7	DB6 Barth oe.	1990-12-04 08:40:00	6.96	DB6 Barth oe.	1993-06-01 16:26:00	83.9		KB90 Fahrwasser I.Libitz w.	2009-07-01 09:16:00	214.01	KB90 Fahrwasser I.Libitz w.	2009-06-18 11:16:00	0.76	KB90 Fahrwasser I.Libitz w.	2008-07-28 08:23:00	20	1.2
WB5 Innenreede w.	1990-01-30 11:01:00	45	WB5 Innenreede w.	1990-02-19 12:10:00	1.95	WB5 Innenreede w.	1993-10-11 16:38:00	8.8	4											UW4 Warnowwerft	2015-02-18 09:37:00	75.2	UW4 Warnowwerft	2014-11-12 11:10:00	2.04					DB6 Barth oe.	1991-01-03 09:15:00	93.4	DB6 Barth oe.	1991-01-03 09:15:00	0.96	DB6 Barth oe.	1993-07-26 11:19:00	71.8	0.4	KB90 Fahrwasser I.Libitz w.	2009-08-17 08:20:00	103.85	KB90 Fahrwasser I.Libitz w.	2009-07-01 09:16:00	0.88	KB90 Fahrwasser I.Libitz w.	2008-08-18 08:25:00	19.2	1
WB5 Innenreede w.	1990-02-19 12:10:00	34.7	WB5 Innenreede w.	1990-03-27 13:36:00	1.84	WB5 Innenreede w.	1994-01-04 12:02:00	0.2	8.6											UW4 Warnowwerft	2015-03-03 12:38:00	82.75	UW4 Warnowwerft	2015-02-18 09:37:00	1.11					DB6 Barth oe.	1991-03-21 08:28:00	257.5	DB6 Barth oe.	1991-01-03 09:15:00	10.64	DB6 Barth oe.	1993-08-11 14:10:00	44.4	0.4	KB90 Fahrwasser I.Libitz w.	2009-09-14 08:26:00	39.77	KB90 Fahrwasser I.Libitz w.	2009-08-17 08:20:00	0.84	KB90 Fahrwasser I.Libitz w.	2008-08-25 08:25:00	21.6	1
WB5 Innenreede w.	1990-03-27 13:36:00	42.5	WB5 Innenreede w.	1990-04-17 11:58:00	2.7	WB5 Innenreede w.	1994-02-08 12:53:00	0.3	8.2											UW4 Warnowwerft	2015-04-21 11:06:00	47.72	UW4 Warnowwerft	2015-03-03 12:38:00	1.24					DB6 Barth oe.	1991-03-21 08:28:00	180.4	DB6 Barth oe.	1991-03-21 08:28:00	0.66	DB6 Barth oe.	1993-09-09 10:36:00	83	0.5	KB90 Fahrwasser I.Libitz w.	2009-10-19 08:40:00	42.36	KB90 Fahrwasser I.Libitz w.	2009-09-14 08:26:00	0.7	KB90 Fahrwasser I.Libitz w.	2008-10-06 08:34:00	6.7	1.2
WB5 Innenreede w.	1990-04-17 11:58:00	39.5	WB5 Innenreede w.	1990-05-22 11:58:00	1.2	WB5 Innenreede w.	1994-03-22 11:25:00	0.7	2.4											UW4 Warnowwerft	2015-06-16 10:18:00	24.87	UW4 Warnowwerft	2015-04-21 11:06:00	1.03					DB6 Barth oe.	1991-04-08 08:41:00	168.4	DB6 Barth oe.	1991-03-21 08:28:00	4.58	DB6 Barth oe.	1993-10-20 10:10:00	64.4	0.5	KB90 Fahrwasser I.Libitz w.	2009-11-23 09:33:00	50.3	KB90 Fahrwasser I.Libitz w.	2009-10-19 08:40:00	0.52	KB90 Fahrwasser I.Libitz w.	2008-11-04 08:32:00	4.5	2.2
WB5 Innenreede w.	1990-05-22 11:58:00	36.6	WB5 Innenreede w.	1990-07-30 12:15:00	1.16	WB5 Innenreede w.	1994-04-21 10:40:00	5.5	3											UW4 Warnowwerft	2015-07-14 09:33:00	34.21	UW4 Warnowwerft	2015-06-16 10:18:00	1.29					DB6 Barth oe.	1991-04-08 08:41:00	117.4	DB6 Barth oe.	1991-04-08 08:41:00	1.34	DB6 Barth oe.	1993-11-18 10:58:00	64.4	0.2	KB90 Fahrwasser I.Libitz w.	2009-11-30 08:34:00	55.79	KB90 Fahrwasser I.Libitz w.	2009-11-23 09:33:00	1.53	KB90 Fahrwasser I.Libitz w.	2008-11-13 09:25:00	6.3	2
WB5 Innenreede w.	1990-07-30 12:15:00	23.4	WB5 Innenreede w.	1990-08-27 11:46:00	1.18	WB5 Innenreede w.	1994-07-26 11:46:00	2.1	3											UW4 Warnowwerft	2015-09-15 09:54:00	30.48	UW4 Warnowwerft	2015-07-14 09:33:00	1.77					DB6 Barth oe.	1991-05-21 08:50:00	159.9	DB6 Barth oe.	1991-04-08 08:41:00	4.58	DB6 Barth oe.	1994-01-17 12:12:00	84.5	0.45	KB90 Fahrwasser I.Libitz w.	2010-04-06 08:28:38	48.14	KB90 Fahrwasser I.Libitz w.	2009-11-30 08:34:00	0.98	KB90 Fahrwasser I.Libitz w.	2009-01-29 08:53:00	6	2.8
WB5 Innenreede w.	1990-08-27 11:46:00	26.6	WB5 Innenreede w.	1990-09-24 10:55:00	1.25	WB5 Innenreede w.	1994-08-17 14:12:00	1.9	2.8											UW4 Warnowwerft	2015-12-15 09:30:00	56.37	UW4 Warnowwerft	2015-09-15 09:54:00	2.29					DB6 Barth oe.	1991-05-21 08:50:00	73	DB6 Barth oe.	1991-05-21 08:50:00	7.14	DB6 Barth oe.	1994-04-12 10:54:00	115	0.3	KB90 Fahrwasser I.Libitz w.	2010-06-14 08:25:00	49.14	KB90 Fahrwasser I.Libitz w.	2010-04-06 08:28:38	0.65	KB90 Fahrwasser I.Libitz w.	2009-02-09 08:33:00	6.8	1.6
WB5 Innenreede w.	1990-09-24 10:55:00	28	WB5 Innenreede w.	1990-11-27 12:40:00	2.02	WB5 Innenreede w.	1994-09-20 13:10:00	4.4	3.75											UW4 Warnowwerft	2016-01-05 09:37:00	49.48	UW4 Warnowwerft	2015-12-15 09:30:00	1.64					DB6 Barth oe.	1991-06-05 08:15:00	44	DB6 Barth oe.	1991-05-21 08:50:00	1.37	DB6 Barth oe.	1994-05-24 12:05:00	137	0.35	KB90 Fahrwasser I.Libitz w.	2010-07-12 08:24:00	59.09	KB90 Fahrwasser I.Libitz w.	2010-06-14 08:25:00	1.37	KB90 Fahrwasser I.Libitz w.	2009-03-09 08:29:00	8.1	2
WB5 Innenreede w.	1990-11-27 12:40:00	32.2	WB5 Innenreede w.	1990-12-18 11:56:00	2.16	WB5 Innenreede w.	1994-10-18 12:39:00	4.7	3.5											UW4 Warnowwerft	2016-03-07 10:31:00	130.81	UW4 Warnowwerft	2016-01-05 09:37:00	1.84					DB6 Barth oe.	1991-06-05 08:15:00	39.1	DB6 Barth oe.	1991-06-05 08:15:00	3.81	DB6 Barth oe.	1994-08-01 12:35:00	34.6	0.35	KB90 Fahrwasser I.Libitz w.	2010-08-09 08:44:00	52.6	KB90 Fahrwasser I.Libitz w.	2010-07-12 08:24:00	2.92	KB90 Fahrwasser I.Libitz w.	2009-04-20 08:45:00	6.1	2
WB5 Innenreede w.	1990-12-18 11:56:00	45.5	WB5 Innenreede w.	1994-01-04 12:02:00	1.21	WB5 Innenreede w.	1994-11-09 12:32:00	2.1	8											UW4 Warnowwerft	2016-04-19 09:30:00	25.16	UW4 Warnowwerft	2016-03-07 10:31:00	1.3					DB6 Barth oe.	1991-07-03 09:00:00	112.3	DB6 Barth oe.	1991-06-05 08:15:00	1.15	DB6 Barth oe.	1994-09-13 10:20:00	39.8	0.55	KB90 Fahrwasser I.Libitz w.	2010-10-21 14:04:22	32.762	KB90 Fahrwasser I.Libitz w.	2010-08-09 08:44:00	1.87	KB90 Fahrwasser I.Libitz w.	2009-05-25 09:05:00	7	1.5
WB5 Innenreede w.	1994-01-04 12:02:00	28.9	WB5 Innenreede w.	1994-02-08 12:53:00	1.64	WB5 Innenreede w.	1995-02-14 12:21:00	0.7	6.15											UW4 Warnowwerft	2016-05-10 10:15:00	40.99	UW4 Warnowwerft	2016-04-19 09:30:00	0.59					DB6 Barth oe.	1991-07-03 09:00:00	116.2	DB6 Barth oe.	1991-07-03 09:00:00	6.67	DB6 Barth oe.	1994-10-26 10:20:00	51.4	0.4	KB90 Fahrwasser I.Libitz w.	2010-11-15 10:29:22	62.162	KB90 Fahrwasser I.Libitz w.	2010-10-21 14:04:22	1.164	KB90 Fahrwasser I.Libitz w.	2009-06-18 11:16:00	4.1	2.5
WB5 Innenreede w.	1994-02-08 12:53:00	74.8	WB5 Innenreede w.	1994-03-22 11:25:00	0.74	WB5 Innenreede w.	1995-04-20 13:04:00	1.4	6.57											UW4 Warnowwerft	2016-06-07 09:40:00	37.97	UW4 Warnowwerft	2016-05-10 10:15:00	1.15					DB6 Barth oe.	1991-08-14 10:40:00	140.8	DB6 Barth oe.	1991-07-03 09:00:00	6.67	DB6 Barth oe.	1995-01-03 10:28:00	57	0.66	KB90 Fahrwasser I.Libitz w.	2011-03-16 11:08:50	81.9	KB90 Fahrwasser I.Libitz w.	2010-11-15 10:29:22	1.632	KB90 Fahrwasser I.Libitz w.	2009-07-01 09:16:00	7.1	1.6
WB5 Innenreede w.	1994-03-22 11:25:00	42.9	WB5 Innenreede w.	1994-04-21 10:40:00	0.62	WB5 Innenreede w.	1995-05-03 12:54:00	0.5	6.3											UW4 Warnowwerft	2016-07-19 09:23:00	31.05	UW4 Warnowwerft	2016-06-07 09:40:00	1.6					DB6 Barth oe.	1991-08-14 10:40:00	61.1	DB6 Barth oe.	1991-08-14 10:40:00	4.63	DB6 Barth oe.	1995-02-02 10:40:00	87.8	0.42	KB90 Fahrwasser I.Libitz w.	2011-04-18 09:40:54	30.753	KB90 Fahrwasser I.Libitz w.	2011-03-16 11:08:50	1.597	KB90 Fahrwasser I.Libitz w.	2009-08-17 08:20:00	14.6	1
WB5 Innenreede w.	1994-04-21 10:40:00	44.8	WB5 Innenreede w.	1994-07-26 11:46:00	0.76	WB5 Innenreede w.	1995-06-27 12:28:00	1.2	6.62											UW4 Warnowwerft	2016-08-23 09:21:00	32.2	UW4 Warnowwerft	2016-07-19 09:23:00	2.11					DB6 Barth oe.	1991-10-14 10:51:00	49.4	DB6 Barth oe.	1991-08-14 10:40:00	0.85	DB6 Barth oe.	1995-03-02 10:15:00	143	0.37	KB90 Fahrwasser I.Libitz w.	2011-05-16 09:51:50	49.886	KB90 Fahrwasser I.Libitz w.	2011-04-18 09:40:54	0.779	KB90 Fahrwasser I.Libitz w.	2009-09-14 08:26:00	12.1	1.1
WB5 Innenreede w.	1994-07-26 11:46:00	18.6	WB5 Innenreede w.	1994-08-17 14:12:00	2.78	WB5 Innenreede w.	1995-07-06 12:25:00	1.6	3.8											UW4 Warnowwerft	2016-09-13 09:19:00	32.69	UW4 Warnowwerft	2016-08-23 09:21:00	1.22					DB6 Barth oe.	1991-10-14 10:51:00	87.6	DB6 Barth oe.	1991-10-14 10:51:00	4.43	DB6 Barth oe.	1995-05-11 10:13:00	46.8	0.48	KB90 Fahrwasser I.Libitz w.	2011-07-05 08:25:07	34.775	KB90 Fahrwasser I.Libitz w.	2011-05-16 09:51:50	1.8522	KB90 Fahrwasser I.Libitz w.	2009-10-19 08:40:00	2	3
WB5 Innenreede w.	1994-08-17 14:12:00	27.2	WB5 Innenreede w.	1994-09-20 13:10:00	0.93	WB5 Innenreede w.	1995-08-02 15:11:00	3.3	1.56											UW4 Warnowwerft	2016-11-09 09:19:00	36.82	UW4 Warnowwerft	2016-09-13 09:19:00	2.75					DB6 Barth oe.	1992-02-17 10:23:00	224.1	DB6 Barth oe.	1991-10-14 10:51:00	5.77	DB6 Barth oe.	1995-06-29 10:30:00	147	0.38	KB90 Fahrwasser I.Libitz w.	2011-08-01 08:27:44	38.787	KB90 Fahrwasser I.Libitz w.	2011-07-05 08:25:07	1.117	KB90 Fahrwasser I.Libitz w.	2009-11-23 09:33:00	9.9	1.2
WB5 Innenreede w.	1994-09-20 13:10:00	14.8	WB5 Innenreede w.	1994-10-18 12:39:00	0.75	WB5 Innenreede w.	1995-10-24 13:11:00	2.8	6											UW4 Warnowwerft	2016-12-13 09:21:00	46.48	UW4 Warnowwerft	2016-11-09 09:19:00	1.62					DB6 Barth oe.	1992-02-17 10:23:00	130.6	DB6 Barth oe.	1992-02-17 10:23:00	6.09	DB6 Barth oe.	1995-07-31 10:14:00	27.7	0.57	KB90 Fahrwasser I.Libitz w.	2011-09-05 08:15:24	50.481	KB90 Fahrwasser I.Libitz w.	2011-08-01 08:27:44	1.236	KB90 Fahrwasser I.Libitz w.	2009-11-30 08:34:00	7.3	2.2
WB5 Innenreede w.	1994-10-18 12:39:00	16.7	WB5 Innenreede w.	1994-11-09 12:32:00	1.11	WB5 Innenreede w.	1995-11-14 13:54:00	3.5	4											UW4 Warnowwerft	2017-01-17 09:28:00	47.79	UW4 Warnowwerft	2016-12-13 09:21:00	1.6					DB6 Barth oe.	1992-05-14 13:04:00	53.9	DB6 Barth oe.	1992-02-17 10:23:00	0.61	DB6 Barth oe.	1995-08-14 10:39:00	40.7	0.32	KB90 Fahrwasser I.Libitz w.	2011-10-04 08:42:42	37.395	KB90 Fahrwasser I.Libitz w.	2011-09-05 08:15:24	1.805	KB90 Fahrwasser I.Libitz w.	2010-04-06 08:28:38	5.8	2
WB5 Innenreede w.	1994-11-09 12:32:00	17.1	WB5 Innenreede w.	1995-02-14 12:21:00	0.94	WB5 Innenreede w.	1996-04-23 12:14:00	1	7											UW4 Warnowwerft	2017-03-28 09:32:00	205.52	UW4 Warnowwerft	2017-01-17 09:28:00	1.09					DB6 Barth oe.	1992-05-14 13:04:00	140.6	DB6 Barth oe.	1992-05-14 13:04:00	5.78	DB6 Barth oe.	1995-09-18 10:32:00	12	0.45	KB90 Fahrwasser I.Libitz w.	2011-11-14 08:39:35	38.876	KB90 Fahrwasser I.Libitz w.	2011-10-04 08:42:42	1.132	KB90 Fahrwasser I.Libitz w.	2010-06-14 08:25:00	22.5	0.6
WB5 Innenreede w.	1995-02-14 12:21:00	38.7	WB5 Innenreede w.	1995-04-20 13:04:00	0.3	WB5 Innenreede w.	1996-05-14 13:35:00	0.8	4.5											UW4 Warnowwerft	2017-04-26 09:34:00	65.86	UW4 Warnowwerft	2017-03-28 09:32:00	1.53					DB6 Barth oe.	1992-07-14 10:14:00	74.8	DB6 Barth oe.	1992-05-14 13:04:00	1	DB6 Barth oe.	1995-10-26 10:26:00	68.2	0.45	KB90 Fahrwasser I.Libitz w.	2012-01-02 09:05:00	50.44	KB90 Fahrwasser I.Libitz w.	2011-11-14 08:39:35	1.111	KB90 Fahrwasser I.Libitz w.	2010-07-12 08:24:00	35.6	0.6
WB5 Innenreede w.	1995-04-20 13:04:00	24.6	WB5 Innenreede w.	1995-05-03 12:54:00	0.21	WB5 Innenreede w.	1996-06-18 13:20:00	2.9	3											UW4 Warnowwerft	2017-05-09 09:48:00	39.92	UW4 Warnowwerft	2017-04-26 09:34:00	1.13					DB6 Barth oe.	1992-07-14 10:14:00	142.3	DB6 Barth oe.	1992-07-14 10:14:00	1.67	DB6 Barth oe.	1995-11-01 12:07:00	42.5	0.6	KB90 Fahrwasser I.Libitz w.	2012-01-30 08:33:00	43.99	KB90 Fahrwasser I.Libitz w.	2012-01-02 09:05:00	1.39	KB90 Fahrwasser I.Libitz w.	2010-08-09 08:44:00	28.7	1
WB5 Innenreede w.	1995-05-03 12:54:00	16.9	WB5 Innenreede w.	1995-06-27 12:28:00	0.69	WB5 Innenreede w.	1996-07-11 13:06:00	2.7	3											UW4 Warnowwerft	2017-06-20 09:39:00	46.73	UW4 Warnowwerft	2017-05-09 09:48:00	0.9					DB6 Barth oe.	1992-11-05 10:35:00	85.6	DB6 Barth oe.	1992-07-14 10:14:00	2.01	DB6 Barth oe.	1996-04-18 10:23:00	37.6	0.44	KB90 Fahrwasser I.Libitz w.	2012-03-14 08:19:00	30.9	KB90 Fahrwasser I.Libitz w.	2012-01-30 08:33:00	1.23	KB90 Fahrwasser I.Libitz w.	2010-10-21 14:04:22	9.8	0.6
WB5 Innenreede w.	1995-06-27 12:28:00	14.6	WB5 Innenreede w.	1995-07-06 12:25:00	0.62	WB5 Innenreede w.	1996-08-13 15:25:00	6.1	3											UW4 Warnowwerft	2017-07-12 09:22:00	59.22	UW4 Warnowwerft	2017-06-20 09:39:00	2.59					DB6 Barth oe.	1992-11-05 10:35:00	221.9	DB6 Barth oe.	1992-11-05 10:35:00	6.84	DB6 Barth oe.	1996-05-02 10:47:00	57.8	0.4	KB90 Fahrwasser I.Libitz w.	2012-04-10 09:07:00	23	KB90 Fahrwasser I.Libitz w.	2012-03-14 08:19:00	0.9	KB90 Fahrwasser I.Libitz w.	2010-11-15 10:29:22	20.8	1
WB5 Innenreede w.	1995-07-06 12:25:00	13.9	WB5 Innenreede w.	1995-08-02 15:11:00	1.42	WB5 Innenreede w.	1996-09-24 13:34:00	2.4	3.5											UW4 Warnowwerft	2017-08-23 09:22:00	46.29	UW4 Warnowwerft	2017-07-12 09:22:00	2.67					DB6 Barth oe.	1993-02-10 10:52:00	174.5	DB6 Barth oe.	1992-11-05 10:35:00	1.02	DB6 Barth oe.	1996-06-27 10:34:00	42.9	0.5	KB90 Fahrwasser I.Libitz w.	2012-05-31 14:41:00	34.65	KB90 Fahrwasser I.Libitz w.	2012-04-10 09:07:00	0.56	KB90 Fahrwasser I.Libitz w.	2011-03-16 11:08:50	47.3	0.8
WB5 Innenreede w.	1995-08-02 15:11:00	23.3	WB5 Innenreede w.	1995-10-24 13:11:00	0.66	WB5 Innenreede w.	1996-10-08 13:36:00	2.6	6.5											UW4 Warnowwerft	2017-09-12 09:32:00	52.33	UW4 Warnowwerft	2017-08-23 09:22:00	2.14					DB6 Barth oe.	1993-02-10 10:52:00	145.5	DB6 Barth oe.	1993-02-10 10:52:00	0.51	DB6 Barth oe.	1996-07-04 10:40:00	41.8	0.4	KB90 Fahrwasser I.Libitz w.	2012-06-18 08:23:00	32.98	KB90 Fahrwasser I.Libitz w.	2012-05-31 14:41:00	1.57	KB90 Fahrwasser I.Libitz w.	2011-04-18 09:40:54	7.05	1.6
WB5 Innenreede w.	1995-10-24 13:11:00	12.3	WB5 Innenreede w.	1995-11-14 13:54:00	1	WB5 Innenreede w.	1996-11-26 12:55:00	0.5	4.5											UW4 Warnowwerft	2017-11-07 09:43:00	126.41	UW4 Warnowwerft	2017-09-12 09:32:00	2.82					DB6 Barth oe.	1993-03-01 10:37:00	132.2	DB6 Barth oe.	1993-02-10 10:52:00	3.34	DB6 Barth oe.	1996-08-01 10:58:00	34.6	0.5	KB90 Fahrwasser I.Libitz w.	2012-07-09 08:19:00	42.12	KB90 Fahrwasser I.Libitz w.	2012-06-18 08:23:00	1.19	KB90 Fahrwasser I.Libitz w.	2011-05-16 09:51:50	13.6	0.8
WB5 Innenreede w.	1995-11-14 13:54:00	13.6	WB5 Innenreede w.	1996-05-14 13:35:00	0.1	WB5 Innenreede w.	1996-12-17 14:06:00	1.1	7											UW4 Warnowwerft	2018-01-16 09:51:00	101.93	UW4 Warnowwerft	2017-11-07 09:43:00	1.76					DB6 Barth oe.	1993-03-01 10:37:00	89.2	DB6 Barth oe.	1993-03-01 10:37:00	0.69	DB6 Barth oe.	1996-09-05 10:55:00	60.5	0.4	KB90 Fahrwasser I.Libitz w.	2012-08-06 08:56:00	53.06	KB90 Fahrwasser I.Libitz w.	2012-07-09 08:19:00	1.52	KB90 Fahrwasser I.Libitz w.	2011-07-05 08:25:07	13.2	1
WB5 Innenreede w.	1996-04-23 12:14:00	15.4	WB5 Innenreede w.	1996-06-18 13:20:00	0.25	WB5 Innenreede w.	1997-02-26 13:08:00	1.2	8											UW4 Warnowwerft	2018-02-20 09:12:00	165.1	UW4 Warnowwerft	2018-01-16 09:51:00	1.55					DB6 Barth oe.	1993-03-29 10:21:00	67	DB6 Barth oe.	1993-03-01 10:37:00	5.62	DB6 Barth oe.	1996-10-01 10:28:00	66.2	0.3	KB90 Fahrwasser I.Libitz w.	2012-09-10 09:30:00	30.57	KB90 Fahrwasser I.Libitz w.	2012-08-06 08:56:00	2.04	KB90 Fahrwasser I.Libitz w.	2011-08-01 08:27:44	14.9	1
WB5 Innenreede w.	1996-05-14 13:35:00	15.4	WB5 Innenreede w.	1996-07-11 13:06:00	0.74	WB5 Innenreede w.	1997-03-18 12:43:00	1.7	8											UW4 Warnowwerft	2018-04-10 09:41:00	203.29	UW4 Warnowwerft	2018-02-20 09:12:00	1.39					DB6 Barth oe.	1993-03-29 10:21:00	44	DB6 Barth oe.	1993-03-29 10:21:00	0.37	DB6 Barth oe.	1996-11-21 11:10:00	51.7	0.4	KB90 Fahrwasser I.Libitz w.	2012-10-01 08:21:00	39.28	KB90 Fahrwasser I.Libitz w.	2012-09-10 09:30:00	1.32	KB90 Fahrwasser I.Libitz w.	2011-09-05 08:15:24	23	0.8
WB5 Innenreede w.	1996-06-18 13:20:00	15.5	WB5 Innenreede w.	1996-08-13 15:25:00	1.1	WB5 Innenreede w.	1997-04-22 13:13:00	2.2	3.5											UW4 Warnowwerft	2018-05-15 09:42:00	49.29	UW4 Warnowwerft	2018-04-10 09:41:00	2.22					DB6 Barth oe.	1993-06-01 16:26:00	149.9	DB6 Barth oe.	1993-03-29 10:21:00	2.46	DB6 Barth oe.	1996-12-05 10:14:00	82.1	0.5	KB90 Fahrwasser I.Libitz w.	2012-11-12 08:48:00	24.86	KB90 Fahrwasser I.Libitz w.	2012-10-01 08:21:00	1.28	KB90 Fahrwasser I.Libitz w.	2011-10-04 08:42:42	18.7	0.8
WB5 Innenreede w.	1996-07-11 13:06:00	18.5	WB5 Innenreede w.	1996-09-24 13:34:00	0.8	WB5 Innenreede w.	1997-05-13 13:33:00	0.8	5											UW4 Warnowwerft	2018-06-05 09:33:00	24.44	UW4 Warnowwerft	2018-05-15 09:42:00	1.79					DB6 Barth oe.	1993-06-01 16:26:00	23.1	DB6 Barth oe.	1993-06-01 16:26:00	1.47	DB6 Barth oe.	1997-03-06 10:09:00	61.6	0.5	KB90 Fahrwasser I.Libitz w.	2013-02-25 10:18:00	66.02	KB90 Fahrwasser I.Libitz w.	2012-11-12 08:48:00	0.84	KB90 Fahrwasser I.Libitz w.	2011-11-14 08:39:35	20.1	1.2
WB5 Innenreede w.	1996-08-13 15:25:00	22.1	WB5 Innenreede w.	1996-10-08 13:36:00	0.6	WB5 Innenreede w.	1997-06-10 14:20:00	1.2	6											UW4 Warnowwerft	2018-07-03 09:44:00	22.47	UW4 Warnowwerft	2018-06-05 09:33:00	2.88					DB6 Barth oe.	1993-07-26 11:19:00	134.5	DB6 Barth oe.	1993-06-01 16:26:00	7.7	DB6 Barth oe.	1997-04-16 10:44:00	24.4	0.8	KB90 Fahrwasser I.Libitz w.	2013-04-15 08:46:00	58.21	KB90 Fahrwasser I.Libitz w.	2013-02-25 10:18:00	1.17	KB90 Fahrwasser I.Libitz w.	2012-01-02 09:05:00	12.1	1.6
WB5 Innenreede w.	1996-09-24 13:34:00	14.3	WB5 Innenreede w.	1996-11-26 12:55:00	0.88	WB5 Innenreede w.	1997-07-22 16:43:00	4.1	4											UW4 Warnowwerft	2018-09-04 09:40:00	30.52	UW4 Warnowwerft	2018-07-03 09:44:00	1					DB6 Barth oe.	1993-07-26 11:19:00	54.9	DB6 Barth oe.	1993-07-26 11:19:00	0.33	DB6 Barth oe.	1997-05-29 10:43:00	4.1	0.3	KB90 Fahrwasser I.Libitz w.	2013-05-06 08:24:00	53.02	KB90 Fahrwasser I.Libitz w.	2013-04-15 08:46:00	1.32	KB90 Fahrwasser I.Libitz w.	2012-01-30 08:33:00	9	1.4
WB5 Innenreede w.	1996-10-08 13:36:00	14.6	WB5 Innenreede w.	1996-12-17 14:06:00	0.91	WB5 Innenreede w.	1997-08-19 17:05:00	5.1	2											UW4 Warnowwerft	2018-11-13 09:25:00	30.11	UW4 Warnowwerft	2018-09-04 09:40:00	2.86					DB6 Barth oe.	1993-08-11 14:10:00	136.3	DB6 Barth oe.	1993-07-26 11:19:00	5.11	DB6 Barth oe.	1997-06-12 10:28:00	46.8	0.5	KB90 Fahrwasser I.Libitz w.	2013-06-03 08:25:00	44.94	KB90 Fahrwasser I.Libitz w.	2013-05-06 08:24:00	1.74	KB90 Fahrwasser I.Libitz w.	2012-03-14 08:19:00	6	3
WB5 Innenreede w.	1996-11-26 12:55:00	22.1	WB5 Innenreede w.	1997-02-26 13:08:00	0.91	WB5 Innenreede w.	1997-11-11 13:38:00	1.8	7														UW4 Warnowwerft	2018-11-13 09:25:00	1.47					DB6 Barth oe.	1993-08-11 14:10:00	39.9	DB6 Barth oe.	1993-08-11 14:10:00	0.46	DB6 Barth oe.	1997-09-08 10:30:00	89.8	0.3	KB90 Fahrwasser I.Libitz w.	2013-07-15 08:17:00	30.71	KB90 Fahrwasser I.Libitz w.	2013-06-03 08:25:00	1.98	KB90 Fahrwasser I.Libitz w.	2012-04-10 09:07:00	5.1	2
WB5 Innenreede w.	1996-12-17 14:06:00	25.7	WB5 Innenreede w.	1997-03-18 12:43:00	0.23	WB5 Innenreede w.	1998-01-20 12:32:00	2	3.7																					DB6 Barth oe.	1993-09-09 10:36:00	72.2	DB6 Barth oe.	1993-08-11 14:10:00	5.82	DB6 Barth oe.	1997-10-20 12:18:00	44.9	0.7	KB90 Fahrwasser I.Libitz w.	2013-08-26 08:22:00	48.51	KB90 Fahrwasser I.Libitz w.	2013-07-15 08:17:00	1.26	KB90 Fahrwasser I.Libitz w.	2012-05-31 14:41:00	12.4	1.6
WB5 Innenreede w.	1997-02-26 13:08:00	30.5	WB5 Innenreede w.	1997-04-22 13:13:00	0.82	WB5 Innenreede w.	1998-02-11 10:50:00	0.3	4.5																					DB6 Barth oe.	1993-09-09 10:36:00	34.6	DB6 Barth oe.	1993-09-09 10:36:00	0.32	DB6 Barth oe.	1997-11-27 10:39:00	48.7	1	KB90 Fahrwasser I.Libitz w.	2013-09-23 08:44:00	39.92	KB90 Fahrwasser I.Libitz w.	2013-08-26 08:22:00	1.61	KB90 Fahrwasser I.Libitz w.	2012-06-18 08:23:00	8.2	1.2
WB5 Innenreede w.	1997-03-18 12:43:00	27.8	WB5 Innenreede w.	1997-05-13 13:33:00	0.24	WB5 Innenreede w.	1998-03-18 11:20:00	5.1	4.2																					DB6 Barth oe.	1993-10-20 10:10:00	190.5	DB6 Barth oe.	1993-09-09 10:36:00	3.27	DB6 Barth oe.	1997-12-16 11:16:00	50.8	0.4	KB90 Fahrwasser I.Libitz w.	2013-10-23 11:51:00	41.92	KB90 Fahrwasser I.Libitz w.	2013-09-23 08:44:00	1.31	KB90 Fahrwasser I.Libitz w.	2012-07-09 08:19:00	15.6	1.2
WB5 Innenreede w.	1997-04-22 13:13:00	21.3	WB5 Innenreede w.	1997-06-10 14:20:00	0.47	WB5 Innenreede w.	1998-04-15 10:20:00	0.8	8																					DB6 Barth oe.	1993-10-20 10:10:00	111.6	DB6 Barth oe.	1993-10-20 10:10:00	1.47	DB6 Barth oe.	1998-03-03 10:15:00	52.5	0.5	KB90 Fahrwasser I.Libitz w.	2014-05-26 08:54:00	40.65	KB90 Fahrwasser I.Libitz w.	2013-10-23 11:51:00	1.83	KB90 Fahrwasser I.Libitz w.	2012-08-06 08:56:00	14.3	1.2
WB5 Innenreede w.	1997-05-13 13:33:00	19.1	WB5 Innenreede w.	1997-07-22 16:43:00	1.03	WB5 Innenreede w.	1998-05-19 15:30:00	1.1	5																					DB6 Barth oe.	1993-11-18 10:58:00	168.9	DB6 Barth oe.	1993-10-20 10:10:00	12.28	DB6 Barth oe.	1998-04-28 10:58:00	141	0.5	KB90 Fahrwasser I.Libitz w.	2014-06-10 08:26:00	48	KB90 Fahrwasser I.Libitz w.	2014-05-26 08:54:00	1.19	KB90 Fahrwasser I.Libitz w.	2012-09-10 09:30:00	4.2	0.3
WB5 Innenreede w.	1997-06-10 14:20:00	20.9	WB5 Innenreede w.	1997-08-19 17:05:00	0.96	WB5 Innenreede w.	1998-06-09 12:24:00	1.6	4																					DB6 Barth oe.	1993-11-18 10:58:00	95.4	DB6 Barth oe.	1993-11-18 10:58:00	1.12	DB6 Barth oe.	1998-05-04 12:26:00	120	0.3	KB90 Fahrwasser I.Libitz w.	2014-07-07 08:25:00	43.49	KB90 Fahrwasser I.Libitz w.	2014-06-10 08:26:00	1.57	KB90 Fahrwasser I.Libitz w.	2012-10-01 08:21:00	11.8	1.4
WB5 Innenreede w.	1997-07-22 16:43:00	26.3	WB5 Innenreede w.	1997-11-11 13:38:00	0.71	WB5 Innenreede w.	1998-07-28 12:32:00	2.5	4																					DB6 Barth oe.	1994-01-17 12:12:00	317	DB6 Barth oe.	1993-11-18 10:58:00	11.96	DB6 Barth oe.	1998-06-11 10:02:00	65.9	0.4	KB90 Fahrwasser I.Libitz w.	2014-08-04 08:47:00	50.58	KB90 Fahrwasser I.Libitz w.	2014-07-07 08:25:00	1.56	KB90 Fahrwasser I.Libitz w.	2012-11-12 08:48:00	4.7	2
WB5 Innenreede w.	1997-08-19 17:05:00	20.4	WB5 Innenreede w.	1998-01-20 12:32:00	0.9	WB5 Innenreede w.	1998-08-11 15:20:00	2.2	4																					DB6 Barth oe.	1994-04-12 10:54:00	200.6	DB6 Barth oe.	1994-01-17 12:12:00	5.62	DB6 Barth oe.	1998-07-27 10:17:00	19	0.4	KB90 Fahrwasser I.Libitz w.	2014-09-23 10:28:00	36.41	KB90 Fahrwasser I.Libitz w.	2014-08-04 08:47:00	1.86	KB90 Fahrwasser I.Libitz w.	2013-02-25 10:18:00	21.6	1
WB5 Innenreede w.	1997-11-11 13:38:00	17.7	WB5 Innenreede w.	1998-02-11 10:50:00	0.79	WB5 Innenreede w.	1998-09-15 13:36:00	2.7	6.5																					DB6 Barth oe.	1994-05-24 12:05:00	163	DB6 Barth oe.	1994-04-12 10:54:00	2.36	DB6 Barth oe.	1998-08-13 10:30:00	16.7	0.8	KB90 Fahrwasser I.Libitz w.	2014-11-13 15:06:00	41.82	KB90 Fahrwasser I.Libitz w.	2014-09-23 10:28:00	1.16	KB90 Fahrwasser I.Libitz w.	2013-04-15 08:46:00	10.2	1.8
WB5 Innenreede w.	1998-01-20 12:32:00	33.3	WB5 Innenreede w.	1998-03-18 11:20:00	0.54	WB5 Innenreede w.	1998-11-02 17:20:00	1.4	3.7																					DB6 Barth oe.	1994-08-01 12:35:00	95.2	DB6 Barth oe.	1994-05-24 12:05:00	12.07	DB6 Barth oe.	1998-10-29 10:18:00	86	0.3	KB90 Fahrwasser I.Libitz w.	2014-12-02 08:35:00	44.2	KB90 Fahrwasser I.Libitz w.	2014-11-13 15:06:00	1.38	KB90 Fahrwasser I.Libitz w.	2013-05-06 08:24:00	32.9	0.8
WB5 Innenreede w.	1998-02-11 10:50:00	36.7	WB5 Innenreede w.	1998-04-15 10:20:00	0.17	WB5 Innenreede w.	1998-12-10 12:58:00	2	2.1																					DB6 Barth oe.	1994-09-13 10:20:00	65.7	DB6 Barth oe.	1994-08-01 12:35:00	2.7	DB6 Barth oe.	1999-01-20 12:00:00	37.4	0.4	KB90 Fahrwasser I.Libitz w.	2015-02-09 08:35:00	50.25	KB90 Fahrwasser I.Libitz w.	2014-12-02 08:35:00	1.71	KB90 Fahrwasser I.Libitz w.	2013-06-03 08:25:00	16	0.6
WB5 Innenreede w.	1998-03-18 11:20:00	29.9	WB5 Innenreede w.	1998-05-19 15:30:00	0.18	WB5 Innenreede w.	1999-01-12 13:30:00	1.8	6																					DB6 Barth oe.	1994-10-26 10:20:00	75	DB6 Barth oe.	1994-09-13 10:20:00	1.93	DB6 Barth oe.	1999-02-03 11:30:00	46.3	0.4	KB90 Fahrwasser I.Libitz w.	2015-03-25 14:29:00	42.14	KB90 Fahrwasser I.Libitz w.	2015-02-09 08:35:00	1.4	KB90 Fahrwasser I.Libitz w.	2013-07-15 08:17:00	8.5	1.7
WB5 Innenreede w.	1998-04-15 10:20:00	22.2	WB5 Innenreede w.	1998-06-09 12:24:00	0.31	WB5 Innenreede w.	1999-02-23 12:56:00	0.6	7																					DB6 Barth oe.	1995-01-03 10:28:00	107	DB6 Barth oe.	1994-10-26 10:20:00	2.25	DB6 Barth oe.	1999-03-22 11:02:00	56.5	0.5	KB90 Fahrwasser I.Libitz w.	2015-05-26 08:35:00	37.07	KB90 Fahrwasser I.Libitz w.	2015-03-25 14:29:00	0.92	KB90 Fahrwasser I.Libitz w.	2013-08-26 08:22:00	22.3	1.2
WB5 Innenreede w.	1998-05-19 15:30:00	20.1	WB5 Innenreede w.	1998-07-28 12:32:00	0.97	WB5 Innenreede w.	1999-03-09 14:20:00	1.6	8																					DB6 Barth oe.	1995-02-02 10:40:00	234	DB6 Barth oe.	1995-01-03 10:28:00	2.26	DB6 Barth oe.	1999-04-19 12:35:00	88.5	0.4	KB90 Fahrwasser I.Libitz w.	2015-06-22 08:23:00	27.14	KB90 Fahrwasser I.Libitz w.	2015-05-26 08:35:00	1.31	KB90 Fahrwasser I.Libitz w.	2013-09-23 08:44:00	11.9	1
WB5 Innenreede w.	1998-06-09 12:24:00	22.3	WB5 Innenreede w.	1998-08-11 15:20:00	0.61	WB5 Innenreede w.	1999-05-05 12:05:00	1.1	8.5																					DB6 Barth oe.	1995-03-02 10:15:00	245	DB6 Barth oe.	1995-02-02 10:40:00	3.64	DB6 Barth oe.	1999-05-27 10:50:00	69.6	0.3	KB90 Fahrwasser I.Libitz w.	2015-07-20 08:32:00	33.68	KB90 Fahrwasser I.Libitz w.	2015-06-22 08:23:00	0.9	KB90 Fahrwasser I.Libitz w.	2013-10-23 11:51:00	10.9	1.6
WB5 Innenreede w.	1998-07-28 12:32:00	22.9	WB5 Innenreede w.	1998-09-15 13:36:00	0.77	WB5 Innenreede w.	1999-06-15 13:55:00	0.5	6.5																					DB6 Barth oe.	1995-05-11 10:13:00	63.9	DB6 Barth oe.	1995-03-02 10:15:00	5.82	DB6 Barth oe.	1999-06-01 10:45:00	53.1	0.4	KB90 Fahrwasser I.Libitz w.	2015-08-10 08:31:00	37.24	KB90 Fahrwasser I.Libitz w.	2015-07-20 08:32:00	1.45	KB90 Fahrwasser I.Libitz w.	2014-05-26 08:54:00	14	1.2
WB5 Innenreede w.	1998-08-11 15:20:00	27.7	WB5 Innenreede w.	1998-11-02 17:20:00	0.94	WB5 Innenreede w.	1999-07-06 15:30:00	4.8	3																					DB6 Barth oe.	1995-06-29 10:30:00	107	DB6 Barth oe.	1995-05-11 10:13:00	1.57	DB6 Barth oe.	1999-07-15 10:25:00	60.3	0.4	KB90 Fahrwasser I.Libitz w.	2015-09-24 13:26:00	33.52	KB90 Fahrwasser I.Libitz w.	2015-08-10 08:31:00	1.26	KB90 Fahrwasser I.Libitz w.	2014-06-10 08:26:00	16.1	1
WB5 Innenreede w.	1998-09-15 13:36:00	19	WB5 Innenreede w.	1998-12-10 12:58:00	0.56	WB5 Innenreede w.	1999-08-18 15:50:00	4.9	2.8																					DB6 Barth oe.	1995-07-31 10:14:00	64.9	DB6 Barth oe.	1995-06-29 10:30:00	5.58	DB6 Barth oe.	1999-08-30 10:15:00	37.1	0.7	KB90 Fahrwasser I.Libitz w.	2015-10-29 14:30:00	35.06	KB90 Fahrwasser I.Libitz w.	2015-09-24 13:26:00	1.17	KB90 Fahrwasser I.Libitz w.	2014-07-07 08:25:00	13	1.2
WB5 Innenreede w.	1998-11-02 17:20:00	24.4	WB5 Innenreede w.	1999-01-12 13:30:00	0.74	WB5 Innenreede w.	1999-09-08 14:40:00	2.5	4.2																					DB6 Barth oe.	1995-08-14 10:39:00	75.9	DB6 Barth oe.	1995-07-31 10:14:00	2.72	DB6 Barth oe.	1999-09-06 09:40:00	42.6	0.6	KB90 Fahrwasser I.Libitz w.	2015-11-26 11:37:00	34.41	KB90 Fahrwasser I.Libitz w.	2015-10-29 14:30:00	2.15	KB90 Fahrwasser I.Libitz w.	2014-08-04 08:47:00	26.4	0.8
WB5 Innenreede w.	1998-12-10 12:58:00	15.4	WB5 Innenreede w.	1999-02-23 12:56:00	0.76	WB5 Innenreede w.	1999-10-19 15:40:00	4.8	3.5																					DB6 Barth oe.	1995-09-18 10:32:00	70	DB6 Barth oe.	1995-08-14 10:39:00	2.52	DB6 Barth oe.	1999-10-04 11:32:00	62.8	0.45	KB90 Fahrwasser I.Libitz w.	2015-12-07 08:32:00	43.05	KB90 Fahrwasser I.Libitz w.	2015-11-26 11:37:00	0.73	KB90 Fahrwasser I.Libitz w.	2014-09-23 10:28:00	11.2	1.2
WB5 Innenreede w.	1999-01-12 13:30:00	23.5	WB5 Innenreede w.	1999-03-09 14:20:00	0.74	WB5 Innenreede w.	1999-11-09 13:48:00	8.2	6																					DB6 Barth oe.	1995-10-26 10:26:00	54	DB6 Barth oe.	1995-09-18 10:32:00	3.46	DB6 Barth oe.	1999-11-30 10:18:00	49.7	0.7	KB90 Fahrwasser I.Libitz w.	2016-03-14 08:25:00	34.55	KB90 Fahrwasser I.Libitz w.	2015-12-07 08:32:00	1.22	KB90 Fahrwasser I.Libitz w.	2014-11-13 15:06:00	16.8	1.4
WB5 Innenreede w.	1999-02-23 12:56:00	37.5	WB5 Innenreede w.	1999-05-05 12:05:00	0.1	WB5 Innenreede w.	2000-01-11 13:15:00	0.7	10																					DB6 Barth oe.	1995-11-01 12:07:00	57.6	DB6 Barth oe.	1995-10-26 10:26:00	2.03	DB6 Barth oe.	1999-12-21 10:12:00	31.6	0.8	KB90 Fahrwasser I.Libitz w.	2016-04-11 08:52:00	41.59	KB90 Fahrwasser I.Libitz w.	2016-03-14 08:25:00	0.63	KB90 Fahrwasser I.Libitz w.	2014-12-02 08:35:00	20.1	1.4
WB5 Innenreede w.	1999-03-09 14:20:00	44.5	WB5 Innenreede w.	1999-06-15 13:55:00	0.23	WB5 Innenreede w.	2000-02-22 14:05:00	0.5	10.5																					DB6 Barth oe.	1996-04-18 10:23:00	122	DB6 Barth oe.	1995-11-01 12:07:00	1.8	DB6 Barth oe.	2000-01-20 10:40:00	30.7	0.6	KB90 Fahrwasser I.Libitz w.	2016-05-17 08:32:00	28.02	KB90 Fahrwasser I.Libitz w.	2016-04-11 08:52:00	1.32	KB90 Fahrwasser I.Libitz w.	2015-02-09 08:35:00	9.7	1.7
WB5 Innenreede w.	1999-05-05 12:05:00	19.6	WB5 Innenreede w.	1999-07-06 15:30:00	0.8	WB5 Innenreede w.	2000-03-20 15:10:00	6.3	6																					DB6 Barth oe.	1996-05-02 10:47:00	91.1	DB6 Barth oe.	1996-04-18 10:23:00	2.6	DB6 Barth oe.	2000-02-29 10:25:00	44.7	0.5	KB90 Fahrwasser I.Libitz w.	2016-06-13 08:22:00	42.7	KB90 Fahrwasser I.Libitz w.	2016-05-17 08:32:00	0.98	KB90 Fahrwasser I.Libitz w.	2015-03-25 14:29:00	11.5	1.5
WB5 Innenreede w.	1999-06-15 13:55:00	17.8	WB5 Innenreede w.	1999-08-18 15:50:00	0.63	WB5 Innenreede w.	2000-04-12 14:35:00	4.2	6.4																					DB6 Barth oe.	1996-06-27 10:34:00	85.9	DB6 Barth oe.	1996-05-02 10:47:00	2.81	DB6 Barth oe.	2000-03-08 09:55:00	55.6	0.4	KB90 Fahrwasser I.Libitz w.	2016-07-25 08:22:00	37.38	KB90 Fahrwasser I.Libitz w.	2016-06-13 08:22:00	1.98	KB90 Fahrwasser I.Libitz w.	2015-05-26 08:35:00	10	1.4
WB5 Innenreede w.	1999-07-06 15:30:00	57.4	WB5 Innenreede w.	1999-09-08 14:40:00	1.08	WB5 Innenreede w.	2000-06-15 13:01:00	1.7	5																					DB6 Barth oe.	1996-07-04 10:40:00	83.9	DB6 Barth oe.	1996-06-27 10:34:00	3.98	DB6 Barth oe.	2000-04-26 11:05:00	78.5	0.5	KB90 Fahrwasser I.Libitz w.	2016-08-16 08:22:00	36.5	KB90 Fahrwasser I.Libitz w.	2016-07-25 08:22:00	1.43	KB90 Fahrwasser I.Libitz w.	2015-06-22 08:23:00	4.9	1.9
WB5 Innenreede w.	1999-08-18 15:50:00	22.9	WB5 Innenreede w.	1999-10-19 15:40:00	0.89	WB5 Innenreede w.	2000-07-25 14:45:00	1.9	5.5																					DB6 Barth oe.	1996-08-01 10:58:00	73.4	DB6 Barth oe.	1996-07-04 10:40:00	3.73	DB6 Barth oe.	2000-05-18 11:45:00	85.9	0.6	KB90 Fahrwasser I.Libitz w.	2016-11-03 11:33:00	28.16	KB90 Fahrwasser I.Libitz w.	2016-08-16 08:22:00	1.25	KB90 Fahrwasser I.Libitz w.	2015-07-20 08:32:00	11.2	1.5
WB5 Innenreede w.	1999-09-08 14:40:00	20.4	WB5 Innenreede w.	1999-11-09 13:48:00	0.61	WB5 Innenreede w.	2000-08-22 15:10:00	8.3	3.2																					DB6 Barth oe.	1996-09-05 10:55:00	78.1	DB6 Barth oe.	1996-08-01 10:58:00	2.6	DB6 Barth oe.	2000-06-05 11:03:00	50.8	0.5	KB90 Fahrwasser I.Libitz w.	2016-12-05 08:28:00	29.13	KB90 Fahrwasser I.Libitz w.	2016-11-03 11:33:00	1.12	KB90 Fahrwasser I.Libitz w.	2015-08-10 08:31:00	9.1	1.6
WB5 Innenreede w.	1999-10-19 15:40:00	19	WB5 Innenreede w.	2000-01-11 13:15:00	1.21	WB5 Innenreede w.	2000-09-26 14:21:00	7.1	3.5																					DB6 Barth oe.	1996-10-01 10:28:00	81.7	DB6 Barth oe.	1996-09-05 10:55:00	5.1	DB6 Barth oe.	2000-07-31 10:30:00	29.7	0.8	KB90 Fahrwasser I.Libitz w.	2017-02-07 12:09:00	44.06	KB90 Fahrwasser I.Libitz w.	2016-12-05 08:28:00	0.85	KB90 Fahrwasser I.Libitz w.	2015-09-24 13:26:00	6.3	1.8
WB5 Innenreede w.	1999-11-09 13:48:00	18	WB5 Innenreede w.	2000-02-22 14:05:00	1.14	WB5 Innenreede w.	2000-10-17 15:00:00	8	3.5																					DB6 Barth oe.	1996-11-21 11:10:00	91.2	DB6 Barth oe.	1996-10-01 10:28:00	4.78	DB6 Barth oe.	2000-08-16 10:20:00	30.4	0.6	KB90 Fahrwasser I.Libitz w.	2017-03-27 08:09:00	38.64	KB90 Fahrwasser I.Libitz w.	2017-02-07 12:09:00	1.41	KB90 Fahrwasser I.Libitz w.	2015-10-29 14:30:00	11.7	1.8
WB5 Innenreede w.	2000-01-11 13:15:00	31.6	WB5 Innenreede w.	2000-03-20 15:10:00	0.59	WB5 Innenreede w.	2000-11-14 15:08:00	2.1	10.3																					DB6 Barth oe.	1996-12-05 10:14:00	125	DB6 Barth oe.	1996-11-21 11:10:00	3.26	DB6 Barth oe.	2000-09-07 10:05:00	51.3	0.75	KB90 Fahrwasser I.Libitz w.	2017-04-18 08:21:00	36.55	KB90 Fahrwasser I.Libitz w.	2017-03-27 08:09:00	0.85	KB90 Fahrwasser I.Libitz w.	2015-11-26 11:37:00	7.6	2.5
WB5 Innenreede w.	2000-02-22 14:05:00	33.2	WB5 Innenreede w.	2000-04-12 14:35:00	1.13	WB5 Innenreede w.	2000-12-12 15:01:00	1.4	9.5																					DB6 Barth oe.	1997-03-06 10:09:00	138	DB6 Barth oe.	1996-12-05 10:14:00	4.6	DB6 Barth oe.	2000-11-02 10:30:00	91.9	0.5	KB90 Fahrwasser I.Libitz w.	2017-05-15 08:13:00	38.88	KB90 Fahrwasser I.Libitz w.	2017-04-18 08:21:00	3.09	KB90 Fahrwasser I.Libitz w.	2015-12-07 08:32:00	11.3	1
WB5 Innenreede w.	2000-03-20 15:10:00	30.2	WB5 Innenreede w.	2000-06-15 13:01:00	1.01	WB5 Innenreede w.	2001-01-09 14:26:00	0.3	10.5																					DB6 Barth oe.	1997-04-16 10:44:00	67	DB6 Barth oe.	1997-03-06 10:09:00	2.84	DB6 Barth oe.	2000-11-28 10:11:00	50.1	0.7	KB90 Fahrwasser I.Libitz w.	2017-06-12 08:32:00	50.69	KB90 Fahrwasser I.Libitz w.	2017-05-15 08:13:00	1.28	KB90 Fahrwasser I.Libitz w.	2016-03-14 08:25:00	6	3.2
WB5 Innenreede w.	2000-04-12 14:35:00	24	WB5 Innenreede w.	2000-07-25 14:45:00	0.72	WB5 Innenreede w.	2001-02-20 17:40:00	1.2	5.5																					DB6 Barth oe.	1997-05-29 10:43:00	133	DB6 Barth oe.	1997-04-16 10:44:00	2.15	DB6 Barth oe.	2001-01-04 13:46:00	45.8	0.7	KB90 Fahrwasser I.Libitz w.	2017-07-27 16:35:00	42.07	KB90 Fahrwasser I.Libitz w.	2017-06-12 08:32:00	2.62	KB90 Fahrwasser I.Libitz w.	2016-04-11 08:52:00	8	1.5
WB5 Innenreede w.	2000-06-15 13:01:00	20.5	WB5 Innenreede w.	2000-08-22 15:10:00	0.61	WB5 Innenreede w.	2001-03-06 15:06:00	6	6.1																					DB6 Barth oe.	1997-06-12 10:28:00	135	DB6 Barth oe.	1997-05-29 10:43:00	4.11	DB6 Barth oe.	2001-02-26 13:42:00	48	0.7	KB90 Fahrwasser I.Libitz w.	2017-08-14 08:31:00	47.3	KB90 Fahrwasser I.Libitz w.	2017-07-27 16:35:00	2.14	KB90 Fahrwasser I.Libitz w.	2016-05-17 08:32:00	4.6	1
WB5 Innenreede w.	2000-07-25 14:45:00	18.7	WB5 Innenreede w.	2000-09-26 14:21:00	0.88	WB5 Innenreede w.	2001-04-18 14:15:00	2.8	5.4																					DB6 Barth oe.	1997-09-08 10:30:00	133	DB6 Barth oe.	1997-06-12 10:28:00	4.16	DB6 Barth oe.	2001-04-09 14:01:00	78.2	0.6	KB90 Fahrwasser I.Libitz w.	2017-10-17 08:09:00	28.09	KB90 Fahrwasser I.Libitz w.	2017-08-14 08:31:00	1.96	KB90 Fahrwasser I.Libitz w.	2016-06-13 08:22:00	15	1
WB5 Innenreede w.	2000-08-22 15:10:00	20	WB5 Innenreede w.	2000-10-17 15:00:00	1.59	WB5 Innenreede w.	2001-04-25 13:16:00	1.1	7.5																					DB6 Barth oe.	1997-10-20 12:18:00	76.5	DB6 Barth oe.	1997-09-08 10:30:00	3.96	DB6 Barth oe.	2001-06-21 12:51:00	40.4	0.6	KB90 Fahrwasser I.Libitz w.	2018-01-22 09:10:00	77.38	KB90 Fahrwasser I.Libitz w.	2017-10-17 08:09:00	1.13	KB90 Fahrwasser I.Libitz w.	2016-07-25 08:22:00	11.2	1.2
WB5 Innenreede w.	2000-09-26 14:21:00	19.5	WB5 Innenreede w.	2000-11-14 15:08:00	1.04	WB5 Innenreede w.	2001-05-15 13:53:00	1.6	5.5																					DB6 Barth oe.	1997-11-27 10:39:00	120	DB6 Barth oe.	1997-10-20 12:18:00	2.14	DB6 Barth oe.	2001-07-12 10:53:00	59.6	0.4	KB90 Fahrwasser I.Libitz w.	2018-04-23 08:44:00	104.98	KB90 Fahrwasser I.Libitz w.	2018-01-22 09:10:00	1.49	KB90 Fahrwasser I.Libitz w.	2016-08-16 08:22:00	8.2	1.2
WB5 Innenreede w.	2000-10-17 15:00:00	20.2	WB5 Innenreede w.	2000-12-12 15:01:00	1.34	WB5 Innenreede w.	2001-06-26 13:43:00	2.2	4.7																					DB6 Barth oe.	1997-12-16 11:16:00	129	DB6 Barth oe.	1997-11-27 10:39:00	2.96	DB6 Barth oe.	2001-08-14 11:50:00	50.1	0.45	KB90 Fahrwasser I.Libitz w.	2018-05-28 08:19:00	51.72	KB90 Fahrwasser I.Libitz w.	2018-04-23 08:44:00	1.66	KB90 Fahrwasser I.Libitz w.	2016-11-03 11:33:00	6.3	1.5
WB5 Innenreede w.	2000-11-14 15:08:00	18.7	WB5 Innenreede w.	2001-01-09 14:26:00	1.38	WB5 Innenreede w.	2001-07-26 10:11:00	2.1	5																					DB6 Barth oe.	1998-03-03 10:15:00	207	DB6 Barth oe.	1997-12-16 11:16:00	3.86	DB6 Barth oe.	2001-09-13 09:51:00	44.4	0.6	KB90 Fahrwasser I.Libitz w.	2018-06-18 08:17:00	45.81	KB90 Fahrwasser I.Libitz w.	2018-05-28 08:19:00	1.54	KB90 Fahrwasser I.Libitz w.	2016-12-05 08:28:00	3.5	2.5
WB5 Innenreede w.	2000-12-12 15:01:00	20	WB5 Innenreede w.	2001-02-20 17:40:00	0.89	WB5 Innenreede w.	2001-08-02 15:00:00	7.7	2.5																					DB6 Barth oe.	1998-04-28 10:58:00	179	DB6 Barth oe.	1998-03-03 10:15:00	3.64	DB6 Barth oe.	2001-10-22 09:52:00	55.8	0.7	KB90 Fahrwasser I.Libitz w.	2018-08-13 08:15:00	55.72	KB90 Fahrwasser I.Libitz w.	2018-06-18 08:17:00	2.01	KB90 Fahrwasser I.Libitz w.	2017-02-07 12:09:00	10.5	1.8
WB5 Innenreede w.	2001-01-09 14:26:00	21.5	WB5 Innenreede w.	2001-03-06 15:06:00	1.36	WB5 Innenreede w.	2001-09-18 14:45:00	8.7	4																					DB6 Barth oe.	1998-05-04 12:26:00	152	DB6 Barth oe.	1998-04-28 10:58:00	3.12	DB6 Barth oe.	2001-11-26 10:41:00	18.8	1	KB90 Fahrwasser I.Libitz w.	2018-09-24 11:57:00	41.68	KB90 Fahrwasser I.Libitz w.	2018-08-13 08:15:00	2.48	KB90 Fahrwasser I.Libitz w.	2017-03-27 08:09:00	5.9	2.5
WB5 Innenreede w.	2001-02-20 17:40:00	30.5	WB5 Innenreede w.	2001-04-18 14:15:00	0.83	WB5 Innenreede w.	2001-10-10 09:49:00	4.4	4.5																					DB6 Barth oe.	1998-06-11 10:02:00	156	DB6 Barth oe.	1998-05-04 12:26:00	3.38	DB6 Barth oe.	2002-01-30 10:49:00	96.4	0.3	KB90 Fahrwasser I.Libitz w.	2018-10-17 09:05:00	44.72	KB90 Fahrwasser I.Libitz w.	2018-09-24 11:57:00	1.71	KB90 Fahrwasser I.Libitz w.	2017-04-18 08:21:00	10.6	1.2
WB5 Innenreede w.	2001-03-06 15:06:00	24.3	WB5 Innenreede w.	2001-04-25 13:16:00	0.45	WB5 Innenreede w.	2001-11-13 15:35:00	2	3.2																					DB6 Barth oe.	1998-07-27 10:17:00	77.5	DB6 Barth oe.	1998-06-11 10:02:00	4.66	DB6 Barth oe.	2002-02-07 11:02:00	41.2	0.7	KB90 Fahrwasser I.Libitz w.	2018-11-06 08:30:00	43.12	KB90 Fahrwasser I.Libitz w.	2018-10-17 09:05:00	2.15	KB90 Fahrwasser I.Libitz w.	2017-05-15 08:13:00	5.7	2
WB5 Innenreede w.	2001-04-18 14:15:00	18.9	WB5 Innenreede w.	2001-05-15 13:53:00	0.47	WB5 Innenreede w.	2001-12-04 13:51:00	1	6.5																					DB6 Barth oe.	1998-08-13 10:30:00	83.9	DB6 Barth oe.	1998-07-27 10:17:00	2.56	DB6 Barth oe.	2002-03-06 14:31:00	76.3	0.3	KB90 Fahrwasser I.Libitz w.	2018-11-26 08:31:00	37.07	KB90 Fahrwasser I.Libitz w.	2018-11-06 08:30:00	2.66	KB90 Fahrwasser I.Libitz w.	2017-06-12 08:32:00	14.4	1.5
WB5 Innenreede w.	2001-04-25 13:16:00	19.4	WB5 Innenreede w.	2001-06-26 13:43:00	0.75	WB5 Innenreede w.	2002-01-15 14:25:00	0.7	10.5																					DB6 Barth oe.	1998-09-30 11:56:00	92.2	DB6 Barth oe.	1998-08-13 10:30:00	2.14	DB6 Barth oe.	2002-04-18 10:09:00	47.8	0.8	RB1 Schaprode w.	1990-04-26 08:16:00	49.5	KB90 Fahrwasser I.Libitz w.	2018-11-26 08:31:00	1.25	KB90 Fahrwasser I.Libitz w.	2017-07-27 16:35:00	15.6	1.2
WB5 Innenreede w.	2001-05-15 13:53:00	18.4	WB5 Innenreede w.	2001-07-26 10:11:00	0.38	WB5 Innenreede w.	2002-03-19 09:55:00	1.6	6																					DB6 Barth oe.	1998-10-29 10:18:00	188	DB6 Barth oe.	1998-09-30 11:56:00	2.83	DB6 Barth oe.	2002-05-29 11:13:00	60.8	0.4	RB1 Schaprode w.	1990-04-26 08:16:00	46.3	RB1 Schaprode w.	1990-04-26 08:16:00	2.18	KB90 Fahrwasser I.Libitz w.	2017-08-14 08:31:00	19.3	0.9
WB5 Innenreede w.	2001-06-26 13:43:00	18.8	WB5 Innenreede w.	2001-08-02 15:00:00	14.9	WB5 Innenreede w.	2002-04-03 13:34:00	2.1	6																					DB6 Barth oe.	1999-01-20 12:00:00	233	DB6 Barth oe.	1998-10-29 10:18:00	7.36	DB6 Barth oe.	2002-06-12 09:36:00	70.7	0.4	RB1 Schaprode w.	1990-05-17 06:47:00	47.2	RB1 Schaprode w.	1990-04-26 08:16:00	2.77	KB90 Fahrwasser I.Libitz w.	2017-10-17 08:09:00	7.2	2.8
WB5 Innenreede w.	2001-07-26 10:11:00	19.7	WB5 Innenreede w.	2001-09-18 14:45:00	1.08	WB5 Innenreede w.	2002-05-07 13:42:00	1.6	6																					DB6 Barth oe.	1999-02-03 11:30:00	259	DB6 Barth oe.	1999-01-20 12:00:00	3.63	DB6 Barth oe.	2002-07-02 12:25:00	56.4	0.6	RB1 Schaprode w.	1990-05-17 06:47:00	38.5	RB1 Schaprode w.	1990-05-17 06:47:00	1.9	KB90 Fahrwasser I.Libitz w.	2018-01-22 09:10:00	7.5	1.5
WB5 Innenreede w.	2001-08-02 15:00:00	21.3	WB5 Innenreede w.	2001-10-10 09:49:00	0.5	WB5 Innenreede w.	2002-06-04 15:00:00	1.4	5																					DB6 Barth oe.	1999-03-22 11:02:00	290	DB6 Barth oe.	1999-02-03 11:30:00	4.29	DB6 Barth oe.	2002-09-04 10:05:00	67	0.5	RB1 Schaprode w.	1990-06-11 15:29:00	64.2	RB1 Schaprode w.	1990-05-17 06:47:00	1.45	KB90 Fahrwasser I.Libitz w.	2018-04-23 08:44:00	35.6	0.5
WB5 Innenreede w.	2001-09-18 14:45:00	25.8	WB5 Innenreede w.	2001-11-13 15:35:00	1.11	WB5 Innenreede w.	2002-07-16 10:23:00	1.5	6																					DB6 Barth oe.	1999-04-19 12:35:00	238	DB6 Barth oe.	1999-03-22 11:02:00	3.31	DB6 Barth oe.	2002-10-10 08:30:00	60.3	0.8	RB1 Schaprode w.	1990-06-11 15:29:00	67.2	RB1 Schaprode w.	1990-07-09 08:09:00	1.66	KB90 Fahrwasser I.Libitz w.	2018-05-28 08:19:00	13.8	1.2
WB5 Innenreede w.	2001-10-10 09:49:00	22.5	WB5 Innenreede w.	2001-12-04 13:51:00	1.53	WB5 Innenreede w.	2002-08-15 16:25:00	3.4	3.2																					DB6 Barth oe.	1999-05-27 10:50:00	160	DB6 Barth oe.	1999-04-19 12:35:00	5.76	DB6 Barth oe.	2002-11-13 10:15:00	40.8	0.7	RB1 Schaprode w.	1990-07-09 08:09:00	42.5	RB1 Schaprode w.	1990-07-09 08:09:00	1.63	KB90 Fahrwasser I.Libitz w.	2018-06-18 08:17:00	12.5	1.2
WB5 Innenreede w.	2001-11-13 15:35:00	21.1	WB5 Innenreede w.	2002-01-15 14:25:00	1.02	WB5 Innenreede w.	2002-09-10 15:10:00	7	2.5																					DB6 Barth oe.	1999-06-01 10:45:00	143	DB6 Barth oe.	1999-05-27 10:50:00	4.19	DB6 Barth oe.	2002-12-02 10:05:00	49.1	0.9	RB1 Schaprode w.	1990-08-06 15:15:00	99.7	RB1 Schaprode w.	1990-08-06 15:15:00	1.89	KB90 Fahrwasser I.Libitz w.	2018-08-13 08:15:00	25.1	0.8
WB5 Innenreede w.	2001-12-04 13:51:00	26.6	WB5 Innenreede w.	2002-04-03 13:34:00	0.22	WB5 Innenreede w.	2002-10-08 11:18:00	6.3	3																					DB6 Barth oe.	1999-07-15 10:25:00	149	DB6 Barth oe.	1999-06-01 10:45:00	4.2	DB6 Barth oe.	2003-03-19 09:45:00	26.1	0.9	RB1 Schaprode w.	1990-08-06 15:15:00	59.2	RB1 Schaprode w.	1990-08-06 15:15:00	1.8	KB90 Fahrwasser I.Libitz w.	2018-09-24 11:57:00	19.2	0.5
WB5 Innenreede w.	2002-01-15 14:25:00	29.6	WB5 Innenreede w.	2002-05-07 13:42:00	0.52	WB5 Innenreede w.	2002-11-18 14:05:00	2.3	6.5																					DB6 Barth oe.	1999-08-30 10:15:00	99.4	DB6 Barth oe.	1999-07-15 10:25:00	5.86	DB6 Barth oe.	2003-04-10 09:07:00	24	0.9	RB1 Schaprode w.	1990-09-03 08:55:00	71.6	RB1 Schaprode w.	1990-09-03 08:55:00	2.17	KB90 Fahrwasser I.Libitz w.	2018-10-17 09:05:00	16.7	1.2
WB5 Innenreede w.	2002-04-03 13:34:00	17.8	WB5 Innenreede w.	2002-06-04 15:00:00	0.36	WB5 Innenreede w.	2002-12-09 14:25:00	0.8	3.4																					DB6 Barth oe.	1999-09-06 09:40:00	88.7	DB6 Barth oe.	1999-08-30 10:15:00	3.38	DB6 Barth oe.	2003-05-19 11:00:00	42.6	0.5	RB1 Schaprode w.	1990-09-03 08:55:00	56.6	RB1 Schaprode w.	1990-09-03 08:55:00	0.76	KB90 Fahrwasser I.Libitz w.	2018-11-06 08:30:00	16.2	1.8
WB5 Innenreede w.	2002-05-07 13:42:00	23	WB5 Innenreede w.	2002-07-16 10:23:00	0.65	WB5 Innenreede w.	2003-03-18 10:42:00	0.7	8.5																					DB6 Barth oe.	1999-10-04 11:32:00	139	DB6 Barth oe.	1999-09-06 09:40:00	2.4	DB6 Barth oe.	2003-06-16 11:20:00	4.3	0.5	RB1 Schaprode w.	1990-10-08 08:25:00	62.3	RB1 Schaprode w.	1990-10-08 08:25:00	1.79	KB90 Fahrwasser I.Libitz w.	2018-11-26 08:31:00	12.2	2.1
WB5 Innenreede w.	2002-06-04 15:00:00	19	WB5 Innenreede w.	2002-08-15 16:25:00	1.05	WB5 Innenreede w.	2003-04-29 15:05:00	0.9	7																					DB6 Barth oe.	1999-11-30 10:18:00	105	DB6 Barth oe.	1999-10-04 11:32:00	3.58	DB6 Barth oe.	2003-07-14 16:00:00	2.9	0.6	RB1 Schaprode w.	1990-10-08 08:25:00	54.7	RB1 Schaprode w.	1990-10-08 08:25:00	1.55	RB1 Schaprode w.	1990-04-26 08:16:00	0.8	3.5
WB5 Innenreede w.	2002-07-16 10:23:00	18.1	WB5 Innenreede w.	2002-09-10 15:10:00	1.26	WB5 Innenreede w.	2003-05-14 15:03:00	1.2	5																					DB6 Barth oe.	1999-12-21 10:12:00	106	DB6 Barth oe.	1999-11-30 10:18:00	3.12	DB6 Barth oe.	2003-08-18 11:20:00	5.2	0.6	RB1 Schaprode w.	1990-11-05 09:01:00	45.5	RB1 Schaprode w.	1990-11-05 09:01:00	2.07	RB1 Schaprode w.	1990-05-17 06:47:00	0.9	2.4
WB5 Innenreede w.	2002-08-15 16:25:00	17.3	WB5 Innenreede w.	2002-10-08 11:18:00	1.06	WB5 Innenreede w.	2003-06-12 10:59:00	2.5	4.5																					DB6 Barth oe.	2000-01-20 10:40:00	120	DB6 Barth oe.	1999-12-21 10:12:00	2.96	DB6 Barth oe.	2003-09-15 11:30:00	13.5	0.7	RB1 Schaprode w.	1990-11-05 09:01:00	41.2	RB1 Schaprode w.	1990-11-05 09:01:00	2.07	RB1 Schaprode w.	1990-08-06 15:15:00	1.7	3.5
WB5 Innenreede w.	2002-09-10 15:10:00	22.4	WB5 Innenreede w.	2002-11-18 14:05:00	1.32	WB5 Innenreede w.	2003-07-02 18:10:00	2.4	3.7																					DB6 Barth oe.	2000-02-29 10:25:00	209	DB6 Barth oe.	2000-01-20 10:40:00	1.94	DB6 Barth oe.	2003-10-13 09:30:00	25	0.9	RB1 Schaprode w.	1994-01-25 09:05:00	117.9	RB1 Schaprode w.	1994-01-25 09:05:00	4.05	RB1 Schaprode w.	1990-09-03 08:55:00	2.6	3.5
WB5 Innenreede w.	2002-10-08 11:18:00	16.9	WB5 Innenreede w.	2002-12-09 14:25:00	2.2	WB5 Innenreede w.	2003-08-12 16:40:00	5.6	1.7																					DB6 Barth oe.	2000-04-26 11:05:00	130	DB6 Barth oe.	2000-02-29 10:25:00	2.9	DB6 Barth oe.	2003-11-10 09:30:00	4.9	1	RB1 Schaprode w.	1994-05-19 08:12:00	51.7	RB1 Schaprode w.	1994-05-19 08:12:00	1.7	RB1 Schaprode w.	1990-10-08 08:25:00	5.3	1.2
WB5 Innenreede w.	2002-11-18 14:05:00	21.8	WB5 Innenreede w.	2003-03-18 10:42:00	0.09	WB5 Innenreede w.	2003-09-23 19:40:00	2.3	3.5																					DB6 Barth oe.	2000-05-18 11:45:00	135	DB6 Barth oe.	2000-04-26 11:05:00	2.82	DB6 Barth oe.	2004-03-18 10:40:00	53.6	0.5	RB1 Schaprode w.	1994-08-10 09:10:00	73	RB1 Schaprode w.	1994-08-10 09:10:00	3.58	RB1 Schaprode w.	1990-11-05 09:01:00	1.5	2.5
WB5 Innenreede w.	2002-12-09 14:25:00	49.6	WB5 Innenreede w.	2003-04-29 15:05:00	0.02	WB5 Innenreede w.	2004-01-08 10:24:00	0.6	7																					DB6 Barth oe.	2000-06-05 11:03:00	148	DB6 Barth oe.	2000-05-18 11:45:00	3.41	DB6 Barth oe.	2004-04-15 10:22:00	43.8	0.35	RB1 Schaprode w.	1994-09-12 10:38:00	36.9	RB1 Schaprode w.	1994-09-12 10:38:00	1.04	RB1 Schaprode w.	1991-01-14 09:14:00	14.7	1
WB5 Innenreede w.	2003-03-18 10:42:00	16.8	WB5 Innenreede w.	2003-05-14 15:03:00	0.04	WB5 Innenreede w.	2004-02-04 10:50:00	1	5.5																					DB6 Barth oe.	2000-07-31 10:30:00	66.7	DB6 Barth oe.	2000-06-05 11:03:00	3.82	DB6 Barth oe.	2004-05-06 07:00:00	95.7	0.3	RB1 Schaprode w.	1994-10-13 08:55:00	30.3	RB1 Schaprode w.	1994-10-13 08:55:00	1.1	RB1 Schaprode w.	1991-03-27 08:36:00	3.1	3
WB5 Innenreede w.	2003-04-29 15:05:00	17.7	WB5 Innenreede w.	2003-06-12 10:59:00	0.61	WB5 Innenreede w.	2004-03-03 12:40:00	3.3	5.8																					DB6 Barth oe.	2000-08-16 10:20:00	73.6	DB6 Barth oe.	2000-07-31 10:30:00	2.15	DB6 Barth oe.	2004-06-17 11:15:00	69.1	0.4	RB1 Schaprode w.	1994-11-29 09:18:00	41.4	RB1 Schaprode w.	1994-11-29 09:18:00	1.92	RB1 Schaprode w.	1991-04-09 08:45:00	18.3	1
WB5 Innenreede w.	2003-05-14 15:03:00	17.7	WB5 Innenreede w.	2003-07-02 18:10:00	0.43	WB5 Innenreede w.	2004-04-01 09:30:00	1	5.5																					DB6 Barth oe.	2000-09-07 10:05:00	81.1	DB6 Barth oe.	2000-08-16 10:20:00	1.78	DB6 Barth oe.	2004-07-14 08:00:00	62.3	0.3	RB1 Schaprode w.	1995-01-31 09:03:00	49.5	RB1 Schaprode w.	1995-01-31 09:03:00	0.7	RB1 Schaprode w.	1991-05-02 08:45:00	1.5	2.3
WB5 Innenreede w.	2003-06-12 10:59:00	18.1	WB5 Innenreede w.	2003-08-12 16:40:00	1.22	WB5 Innenreede w.	2004-05-18 14:55:00	1.7	6																					DB6 Barth oe.	2000-11-02 10:30:00	137	DB6 Barth oe.	2000-09-07 10:05:00	3.26	DB6 Barth oe.	2004-08-24 07:40:00	50.4	0.4	RB1 Schaprode w.	1995-02-27 10:30:00	71.9	RB1 Schaprode w.	1995-02-27 10:30:00	0.72	RB1 Schaprode w.	1991-06-06 08:32:00	0.5	3.6
WB5 Innenreede w.	2003-07-02 18:10:00	17.2	WB5 Innenreede w.	2003-09-23 19:40:00	1	WB5 Innenreede w.	2004-06-23 09:45:00	3.5	3.5																					DB6 Barth oe.	2000-11-28 10:11:00	89.6	DB6 Barth oe.	2000-11-02 10:30:00	3.52	DB6 Barth oe.	2004-09-28 13:00:00	33.8	0.5	RB1 Schaprode w.	1995-03-21 09:02:00	69.2	RB1 Schaprode w.	1995-03-21 09:02:00	1.21	RB1 Schaprode w.	1991-07-10 08:47:00	7.5	1.7
WB5 Innenreede w.	2003-08-12 16:40:00	19.3	WB5 Innenreede w.	2004-01-08 10:24:00	0.81	WB5 Innenreede w.	2004-07-21 09:20:00	3.7	3.7																					DB6 Barth oe.	2001-01-04 13:46:00	128	DB6 Barth oe.	2000-11-28 10:11:00	2.54	DB6 Barth oe.	2004-10-20 09:05:00	53.9	0.4	RB1 Schaprode w.	1995-04-24 09:14:00	17.6	RB1 Schaprode w.	1995-04-24 09:14:00	0.49	RB1 Schaprode w.	1991-08-01 08:33:00	7	2
WB5 Innenreede w.	2003-09-23 19:40:00	20.3	WB5 Innenreede w.	2004-02-04 10:50:00	1.34	WB5 Innenreede w.	2004-08-17 17:05:00	8.6	3																					DB6 Barth oe.	2001-02-26 13:42:00	131	DB6 Barth oe.	2001-01-04 13:46:00	3.9	DB6 Barth oe.	2004-11-08 07:40:00	46.9	0.5	RB1 Schaprode w.	1995-05-17 08:54:00	13.4	RB1 Schaprode w.	1995-05-17 08:54:00	0.38	RB1 Schaprode w.	1991-10-01 08:32:00	2.6	1.8
WB5 Innenreede w.	2004-01-08 10:24:00	18.8	WB5 Innenreede w.	2004-03-03 12:40:00	0.87	WB5 Innenreede w.	2004-09-16 14:00:00	3.4	4.5																					DB6 Barth oe.	2001-04-09 14:01:00	136	DB6 Barth oe.	2001-02-26 13:42:00	3.03	DB6 Barth oe.	2004-12-02 08:00:00	40.2	0.5	RB1 Schaprode w.	1995-07-24 09:05:00	30	RB1 Schaprode w.	1995-07-24 09:05:00	1.12	RB1 Schaprode w.	1991-11-04 08:50:00	2	2.5
WB5 Innenreede w.	2004-02-04 10:50:00	26.5	WB5 Innenreede w.	2004-04-01 09:30:00	0.42	WB5 Innenreede w.	2004-10-06 10:30:00	3.1	4.5																					DB6 Barth oe.	2001-06-21 12:51:00	100	DB6 Barth oe.	2001-04-09 14:01:00	3.31	DB6 Barth oe.	2005-01-17 10:30:00	24	0.8	RB1 Schaprode w.	1995-08-17 09:10:00	34.8	RB1 Schaprode w.	1995-08-17 09:10:00	1.34	RB1 Schaprode w.	1991-12-16 09:32:00	3.5	2.5
WB5 Innenreede w.	2004-03-03 12:40:00	24.2	WB5 Innenreede w.	2004-05-18 14:55:00	0.64	WB5 Innenreede w.	2004-12-01 10:25:00	1.4	5.5																					DB6 Barth oe.	2001-07-12 10:53:00	125	DB6 Barth oe.	2001-06-21 12:51:00	3.42	DB6 Barth oe.	2005-02-21 09:10:00	41.5	0.5	RB1 Schaprode w.	1995-09-07 10:30:00	24.6	RB1 Schaprode w.	1995-09-07 10:30:00	0.64	RB1 Schaprode w.	1992-02-13 09:25:00	1.8	2.4
WB5 Innenreede w.	2004-04-01 09:30:00	15.4	WB5 Innenreede w.	2004-06-23 09:45:00	0.96	WB5 Innenreede w.	2005-01-19 09:00:00	1.1	5.5																					DB6 Barth oe.	2001-08-14 11:50:00	101	DB6 Barth oe.	2001-07-12 10:53:00	4.83	DB6 Barth oe.	2005-03-22 08:30:00	43.9	0.5	RB1 Schaprode w.	1995-11-02 08:48:00	21.9	RB1 Schaprode w.	1995-11-02 08:48:00	0.51	RB1 Schaprode w.	1992-05-13 08:46:00	6.6	0.7
WB5 Innenreede w.	2004-05-18 14:55:00	11.4	WB5 Innenreede w.	2004-07-21 09:20:00	0.47	WB5 Innenreede w.	2005-02-02 09:45:00	1.2	4.5																					DB6 Barth oe.	2001-09-13 09:51:00	82.6	DB6 Barth oe.	2001-08-14 11:50:00	2.78	DB6 Barth oe.	2005-04-26 07:20:00	60.6	0.3	RB1 Schaprode w.	1996-04-25 08:52:00	27.3	RB1 Schaprode w.	1996-04-25 08:52:00	0.55	RB1 Schaprode w.	1992-07-15 08:43:00	22.5	0.7
WB5 Innenreede w.	2004-06-23 09:45:00	15.4	WB5 Innenreede w.	2004-08-17 17:05:00	0.77	WB5 Innenreede w.	2005-03-07 15:40:00	0.7	4																					DB6 Barth oe.	2001-10-22 09:52:00	82.5	DB6 Barth oe.	2001-09-13 09:51:00	2.26	DB6 Barth oe.	2005-05-18 07:35:00	49.3	0.3	RB1 Schaprode w.	1996-05-22 08:54:00	30.7	RB1 Schaprode w.	1996-05-22 08:54:00	0.73	RB1 Schaprode w.	1992-11-04 09:12:00	7.1	0.9
WB5 Innenreede w.	2004-07-21 09:20:00	38.4	WB5 Innenreede w.	2004-09-16 14:00:00	1.25	WB5 Innenreede w.	2005-04-06 09:40:00	1.8	5																					DB6 Barth oe.	2001-11-26 10:41:00	70.3	DB6 Barth oe.	2001-10-22 09:52:00	2.01	DB6 Barth oe.	2005-06-20 08:00:00	53.1	0.4	RB1 Schaprode w.	1996-06-20 09:00:00	34.2	RB1 Schaprode w.	1996-06-20 09:00:00	1.32	RB1 Schaprode w.	1993-07-28 08:58:00	1	2.5
WB5 Innenreede w.	2004-08-17 17:05:00	23.6	WB5 Innenreede w.	2004-10-06 10:30:00	1.09	WB5 Innenreede w.	2005-05-25 09:40:00	0.9	4																					DB6 Barth oe.	2002-01-30 10:49:00	219	DB6 Barth oe.	2001-11-26 10:41:00	2.25	DB6 Barth oe.	2005-07-25 09:22:00	33.5	0.5	RB1 Schaprode w.	1996-07-18 09:07:00	19.5	RB1 Schaprode w.	1996-07-18 09:07:00	0.28	RB1 Schaprode w.	1993-08-11 11:20:00	1.2	2
WB5 Innenreede w.	2004-09-16 14:00:00	20.9	WB5 Innenreede w.	2004-12-01 10:25:00	0.79	WB5 Innenreede w.	2005-06-14 09:27:00	1.8	4.5																					DB6 Barth oe.	2002-02-07 11:02:00	149	DB6 Barth oe.	2002-01-30 10:49:00	5.37	DB6 Barth oe.	2005-08-22 08:32:00	29.1	0.6	RB1 Schaprode w.	1996-08-15 09:05:00	33.9	RB1 Schaprode w.	1996-08-15 09:05:00	0.97	RB1 Schaprode w.	1993-09-13 09:56:00	1.3	3.2
WB5 Innenreede w.	2004-10-06 10:30:00	23.6	WB5 Innenreede w.	2005-01-19 09:00:00	0.66	WB5 Innenreede w.	2005-07-27 09:30:00	4.2	3.5																					DB6 Barth oe.	2002-03-06 14:31:00	284	DB6 Barth oe.	2002-02-07 11:02:00	2.33	DB6 Barth oe.	2005-09-19 07:57:00	47.3	0.5	RB1 Schaprode w.	1996-09-26 09:21:00	20.5	RB1 Schaprode w.	1996-09-26 09:21:00	0.49	RB1 Schaprode w.	1993-10-21 08:22:00	2.5	2.8
WB5 Innenreede w.	2004-12-01 10:25:00	21.3	WB5 Innenreede w.	2005-02-02 09:45:00	1.1	WB5 Innenreede w.	2005-08-10 10:01:00	2.3	4.5																					DB6 Barth oe.	2002-04-18 10:09:00	284	DB6 Barth oe.	2002-03-06 14:31:00	5.24	DB6 Barth oe.	2005-10-10 07:45:00	46.8	0.6	RB1 Schaprode w.	1996-10-10 09:37:00	20.8	RB1 Schaprode w.	1996-10-10 09:37:00	0.49	RB1 Schaprode w.	1994-01-25 09:05:00	13.5	0.45
WB5 Innenreede w.	2005-01-19 09:00:00	27.3	WB5 Innenreede w.	2005-03-07 15:40:00	1.34	WB5 Innenreede w.	2005-09-21 09:40:00	2.1	6.5																					DB6 Barth oe.	2002-05-29 11:13:00	98.5	DB6 Barth oe.	2002-04-18 10:09:00	1.36	DB6 Barth oe.	2005-11-07 08:00:00	51.9	0.5	RB1 Schaprode w.	1996-11-04 09:37:00	42.2	RB1 Schaprode w.	1996-11-04 09:37:00	0.95	RB1 Schaprode w.	1994-05-19 08:12:00	17.9	0.6
WB5 Innenreede w.	2005-02-02 09:45:00	22.1	WB5 Innenreede w.	2005-04-06 09:40:00	0.26	WB5 Innenreede w.	2005-10-12 09:35:00	5.4	4																					DB6 Barth oe.	2002-06-12 09:36:00	105	DB6 Barth oe.	2002-05-29 11:13:00	2.52	DB6 Barth oe.	2005-12-07 09:30:00	38.5	0.5	RB1 Schaprode w.	1996-12-11 09:47:00	43	RB1 Schaprode w.	1996-12-11 09:47:00	0.93	RB1 Schaprode w.	1994-08-10 09:10:00	19.1	0.36
WB5 Innenreede w.	2005-03-07 15:40:00	30.6	WB5 Innenreede w.	2005-05-25 09:40:00	0.53	WB5 Innenreede w.	2005-11-08 14:53:00	1.7	6																					DB6 Barth oe.	2002-07-02 12:25:00	96	DB6 Barth oe.	2002-06-12 09:36:00	3.27	DB6 Barth oe.	2006-03-30 08:05:00	30.4	0.6	RB1 Schaprode w.	1997-03-24 09:34:00	39.3	RB1 Schaprode w.	1997-03-24 09:34:00	0.8	RB1 Schaprode w.	1994-09-12 10:38:00	17.3	0.9
WB5 Innenreede w.	2005-04-06 09:40:00	24	WB5 Innenreede w.	2005-06-14 09:27:00	0.72	WB5 Innenreede w.	2006-01-11 10:29:00	0.4	6																					DB6 Barth oe.	2002-09-04 10:05:00	108	DB6 Barth oe.	2002-07-02 12:25:00	2.8	DB6 Barth oe.	2006-04-19 14:00:00	49.6	0.3	RB1 Schaprode w.	1997-04-17 09:10:00	27.8	RB1 Schaprode w.	1997-04-17 09:10:00	0.64	RB1 Schaprode w.	1994-10-13 08:55:00	9.1	1.3
WB5 Innenreede w.	2005-05-25 09:40:00	16	WB5 Innenreede w.	2005-07-27 09:30:00	0.83	WB5 Innenreede w.	2006-02-22 09:28:00	3.2	5																					DB6 Barth oe.	2002-10-10 08:30:00	68	DB6 Barth oe.	2002-09-04 10:05:00	2.59	DB6 Barth oe.	2006-05-11 07:45:00	81.9	0.3	RB1 Schaprode w.	1997-05-27 09:18:00	32.5	RB1 Schaprode w.	1997-05-27 09:18:00	1	RB1 Schaprode w.	1994-11-29 09:18:00	7.4	0.45
WB5 Innenreede w.	2005-06-14 09:27:00	14.6	WB5 Innenreede w.	2005-08-10 10:01:00	0.94	WB5 Innenreede w.	2006-03-15 13:32:00	2.7	4.5																					DB6 Barth oe.	2002-11-13 10:15:00	90.8	DB6 Barth oe.	2002-10-10 08:30:00	3.37	DB6 Barth oe.	2006-06-12 08:30:00	53.5	0.3	RB1 Schaprode w.	1997-08-11 15:06:00	44.3	RB1 Schaprode w.	1997-08-11 15:06:00	1.11	RB1 Schaprode w.	1995-01-31 09:03:00	4.1	1.5
WB5 Innenreede w.	2005-07-27 09:30:00	19.1	WB5 Innenreede w.	2005-09-21 09:40:00	1.24	WB5 Innenreede w.	2006-04-12 09:17:00	8.5	3.5																					DB6 Barth oe.	2002-12-02 10:05:00	156	DB6 Barth oe.	2002-11-13 10:15:00	3.14	DB6 Barth oe.	2006-07-05 07:20:00	31.3	0.3	RB1 Schaprode w.	1997-09-11 09:08:00	33.1	RB1 Schaprode w.	1997-09-11 09:08:00	0.9	RB1 Schaprode w.	1995-02-27 10:30:00	7	1.95
WB5 Innenreede w.	2005-08-10 10:01:00	15.2	WB5 Innenreede w.	2005-10-12 09:35:00	0.89	WB5 Innenreede w.	2006-08-23 10:40:00	7.9	4																					DB6 Barth oe.	2003-03-19 09:45:00	108	DB6 Barth oe.	2002-12-02 10:05:00	3.45	DB6 Barth oe.	2006-08-07 10:17:00	82.4	0.3	RB1 Schaprode w.	1997-10-28 09:13:00	26.4	RB1 Schaprode w.	1997-10-28 09:13:00	0.36	RB1 Schaprode w.	1995-03-21 09:02:00	12.9	0.7
WB5 Innenreede w.	2005-09-21 09:40:00	18.4	WB5 Innenreede w.	2005-11-08 14:53:00	1.38	WB5 Innenreede w.	2006-09-21 10:25:00	3.5	3.5																					DB6 Barth oe.	2003-04-10 09:07:00	80.3	DB6 Barth oe.	2003-03-19 09:45:00	1.61	DB6 Barth oe.	2006-09-07 07:15:00	71.6	0.5	RB1 Schaprode w.	1997-11-24 09:21:00	28.1	RB1 Schaprode w.	1997-11-24 09:21:00	0.34	RB1 Schaprode w.	1995-04-24 09:14:00	1.8	2.75
WB5 Innenreede w.	2005-10-12 09:35:00	6.1	WB5 Innenreede w.	2006-01-11 10:29:00	6.42	WB5 Innenreede w.	2006-10-19 08:39:00	4.1	4.5																					DB6 Barth oe.	2003-05-19 11:00:00	78.2	DB6 Barth oe.	2003-04-10 09:07:00	1.95	DB6 Barth oe.	2006-10-25 08:00:00	63.6	0.5	RB1 Schaprode w.	1997-12-15 10:16:00	32.6	RB1 Schaprode w.	1997-12-15 10:16:00	0.58	RB1 Schaprode w.	1995-05-17 08:54:00	1.7	1.85
WB5 Innenreede w.	2005-11-08 14:53:00	22.7	WB5 Innenreede w.	2006-02-22 09:28:00	0.63	WB5 Innenreede w.	2006-12-19 08:41:00	1.6	5.5																					DB6 Barth oe.	2003-07-14 16:00:00	23.7	DB6 Barth oe.	2003-05-19 11:00:00	1.32	DB6 Barth oe.	2006-11-22 07:50:00	35.9	0.7	RB1 Schaprode w.	1998-03-02 10:47:00	57.2	RB1 Schaprode w.	1998-03-02 10:47:00	1.44	RB1 Schaprode w.	1995-07-24 09:05:00	5.1	1.89
WB5 Innenreede w.	2006-01-11 10:29:00	18	WB5 Innenreede w.	2006-03-15 13:32:00	8.04	WB5 Innenreede w.	2007-02-07 08:35:00	0.6	4.5																					DB6 Barth oe.	2003-08-18 11:20:00	39.1	DB6 Barth oe.	2003-06-16 11:20:00	1.73	DB6 Barth oe.	2006-12-12 09:03:00	29.1	0.5	RB1 Schaprode w.	1998-03-12 13:26:00	37.5	RB1 Schaprode w.	1998-03-12 13:26:00	0.9	RB1 Schaprode w.	1995-08-17 09:10:00	8.5	2
WB5 Innenreede w.	2006-02-22 09:28:00	23.6	WB5 Innenreede w.	2006-04-12 09:17:00	0.2	WB5 Innenreede w.	2007-03-27 08:14:00	6.4	2.5																					DB6 Barth oe.	2003-09-15 11:30:00	37.3	DB6 Barth oe.	2003-07-14 16:00:00	1.12	DB6 Barth oe.	2007-01-22 09:16:00	59.8	0.3	RB1 Schaprode w.	1998-05-13 09:50:00	30	RB1 Schaprode w.	1998-05-13 09:50:00	0.17	RB1 Schaprode w.	1995-09-07 10:30:00	3.9	2.2
WB5 Innenreede w.	2006-03-15 13:32:00	16.7	WB5 Innenreede w.	2006-08-23 10:40:00	1.84	WB5 Innenreede w.	2007-06-20 12:15:00	2	3.5																					DB6 Barth oe.	2003-10-13 09:30:00	19.2	DB6 Barth oe.	2003-08-18 11:20:00	0.77	DB6 Barth oe.	2007-02-07 08:08:00	25.5	0.7	RB1 Schaprode w.	1998-06-18 09:20:00	57.6	RB1 Schaprode w.	1998-06-18 09:20:00	2.81	RB1 Schaprode w.	1995-11-02 08:48:00	2.4	2.9
WB5 Innenreede w.	2006-04-12 09:17:00	22.4	WB5 Innenreede w.	2006-09-21 10:25:00	0.75	WB5 Innenreede w.	2007-07-12 11:15:00	2.6	2.5																					DB6 Barth oe.	2003-11-10 09:30:00	57.8	DB6 Barth oe.	2003-09-15 11:30:00	1.26	DB6 Barth oe.	2007-03-12 07:15:00	43.1	0.6	RB1 Schaprode w.	1998-07-06 07:50:00	67.9	RB1 Schaprode w.	1998-07-06 07:50:00	2.68	RB1 Schaprode w.	1996-04-25 08:52:00	4.6	2.5
WB5 Innenreede w.	2006-08-23 10:40:00	25.3	WB5 Innenreede w.	2006-10-19 08:39:00	0.92	WB5 Innenreede w.	2007-08-28 10:02:00	3.1	3																					DB6 Barth oe.	2004-03-18 10:40:00	160	DB6 Barth oe.	2003-10-13 09:30:00	2.31	DB6 Barth oe.	2007-04-12 08:20:00	74.7	0.4	RB1 Schaprode w.	1998-08-06 08:38:00	53.7	RB1 Schaprode w.	1998-08-06 08:38:00	1.82	RB1 Schaprode w.	1996-05-22 08:54:00	2	2.5
WB5 Innenreede w.	2006-09-21 10:25:00	12	WB5 Innenreede w.	2006-12-19 08:41:00	0.84	WB5 Innenreede w.	2007-09-12 09:39:00	2.9	2.8																					DB6 Barth oe.	2004-04-15 10:22:00	86.6	DB6 Barth oe.	2003-11-10 09:30:00	1.61	DB6 Barth oe.	2007-05-23 07:30:00	14.1	0.3	RB1 Schaprode w.	1998-09-28 10:15:00	35.3	RB1 Schaprode w.	1998-09-28 10:15:00	0.6	RB1 Schaprode w.	1996-06-20 09:00:00	7.6	0.9
WB5 Innenreede w.	2006-10-19 08:39:00	14	WB5 Innenreede w.	2007-02-07 08:35:00	1.1	WB5 Innenreede w.	2007-10-10 09:34:00	3.5	3																					DB6 Barth oe.	2004-05-06 07:00:00	103	DB6 Barth oe.	2004-03-18 10:40:00	2.95	DB6 Barth oe.	2007-06-21 07:50:00	40.7	0.45	RB1 Schaprode w.	1998-10-27 09:20:00	46.8	RB1 Schaprode w.	1998-10-27 09:20:00	1.4	RB1 Schaprode w.	1996-07-18 09:07:00	2	2
WB5 Innenreede w.	2006-12-19 08:41:00	26.4	WB5 Innenreede w.	2007-03-27 08:14:00	0.91	WB5 Innenreede w.	2007-12-13 10:08:00	0.8	5																					DB6 Barth oe.	2004-06-17 11:15:00	61.6	DB6 Barth oe.	2004-04-15 10:22:00	3.12	DB6 Barth oe.	2007-07-09 10:20:00	90.1	0.3	RB1 Schaprode w.	1999-01-28 09:12:00	74.7	RB1 Schaprode w.	1999-01-28 09:12:00	0.99	RB1 Schaprode w.	1996-08-15 09:05:00	4.3	2.5
WB5 Innenreede w.	2007-02-07 08:35:00	36.21	WB5 Innenreede w.	2007-06-20 12:15:00	0.69	WB5 Innenreede w.	2008-01-16 14:25:00	0.5	7.5																					DB6 Barth oe.	2004-07-14 08:00:00	83.7	DB6 Barth oe.	2004-05-06 07:00:00	2.53	DB6 Barth oe.	2007-08-13 11:20:00	78.8	0.4	RB1 Schaprode w.	1999-03-03 09:01:00	39.8	RB1 Schaprode w.	1999-03-03 09:01:00	0.68	RB1 Schaprode w.	1996-09-26 09:21:00	1.6	3.2
WB5 Innenreede w.	2007-03-27 08:14:00	32.98	WB5 Innenreede w.	2007-07-12 11:15:00	0.85	WB5 Innenreede w.	2008-02-25 10:29:00	4.6	5.5																					DB6 Barth oe.	2004-08-24 07:40:00	126	DB6 Barth oe.	2004-06-17 11:15:00	4.67	DB6 Barth oe.	2007-09-05 10:32:00	28	0.6	RB1 Schaprode w.	1999-05-31 09:02:00	54	RB1 Schaprode w.	1999-05-31 09:02:00	1.58	RB1 Schaprode w.	1996-10-10 09:37:00	1.7	3
WB5 Innenreede w.	2007-06-20 12:15:00	16.06	WB5 Innenreede w.	2007-08-28 10:02:00	1.06	WB5 Innenreede w.	2008-03-03 10:18:00	2.3	3.5																					DB6 Barth oe.	2004-09-28 13:00:00	100	DB6 Barth oe.	2004-07-14 08:00:00	3.3	DB6 Barth oe.	2007-10-11 07:50:00	50.4	0.5	RB1 Schaprode w.	1999-06-17 09:20:00	58.7	RB1 Schaprode w.	1999-06-17 09:20:00	1.86	RB1 Schaprode w.	1996-11-04 09:37:00	4.3	1.1
WB5 Innenreede w.	2007-07-12 11:15:00	18.97	WB5 Innenreede w.	2007-09-12 09:39:00	1.08	WB5 Innenreede w.	2008-05-28 09:55:00	1	3																					DB6 Barth oe.	2004-10-20 09:05:00	134	DB6 Barth oe.	2004-08-24 07:40:00	3.27	DB6 Barth oe.	2007-11-21 08:50:00	39.2	0.35	RB1 Schaprode w.	1999-07-08 09:21:00	242	RB1 Schaprode w.	1999-07-08 09:21:00	3.01	RB1 Schaprode w.	1996-12-11 09:47:00	6.8	2.4
WB5 Innenreede w.	2007-08-28 10:02:00	19.09	WB5 Innenreede w.	2007-10-10 09:34:00	1.2	WB5 Innenreede w.	2008-07-08 14:38:00	2.5	3.8																					DB6 Barth oe.	2004-11-08 07:40:00	101	DB6 Barth oe.	2004-09-28 13:00:00	3.16	DB6 Barth oe.	2007-12-04 08:50:00	72.3	0.4	RB1 Schaprode w.	1999-08-11 09:01:00	66.3	RB1 Schaprode w.	1999-08-11 09:01:00	2.16	RB1 Schaprode w.	1997-03-24 09:34:00	6	2
WB5 Innenreede w.	2007-09-12 09:39:00	21.89	WB5 Innenreede w.	2008-01-16 14:25:00	1.48	WB5 Innenreede w.	2008-08-27 09:00:00	3.4	5.5																					DB6 Barth oe.	2004-12-02 08:00:00	124	DB6 Barth oe.	2004-10-20 09:05:00	3.12	DB6 Barth oe.	2008-01-21 08:20:00	68.4	0.4	RB1 Schaprode w.	1999-09-30 09:15:00	65.4	RB1 Schaprode w.	1999-09-30 09:15:00	1.66	RB1 Schaprode w.	1997-04-17 09:10:00	2	1.7
WB5 Innenreede w.	2007-10-10 09:34:00	17.8	WB5 Innenreede w.	2008-02-25 10:29:00	1.13	WB5 Innenreede w.	2009-01-20 14:46:00	0.8	6.5																					DB6 Barth oe.	2005-01-17 10:30:00	64.1	DB6 Barth oe.	2004-11-08 07:40:00	2.64	DB6 Barth oe.	2008-02-14 08:30:00	35.4	0.5	RB1 Schaprode w.	1999-11-11 09:25:00	39.2	RB1 Schaprode w.	1999-11-11 09:25:00	0.76	RB1 Schaprode w.	1997-05-27 09:18:00	1.6	2.8
WB5 Innenreede w.	2008-01-16 14:25:00	28.65	WB5 Innenreede w.	2008-03-03 10:18:00	0.98	WB5 Innenreede w.	2009-02-17 14:18:00	4	4.5																					DB6 Barth oe.	2005-02-21 09:10:00	95.7	DB6 Barth oe.	2004-12-02 08:00:00	1.87	DB6 Barth oe.	2008-03-19 08:15:00	20.7	0.5	RB1 Schaprode w.	1999-12-09 09:22:00	49	RB1 Schaprode w.	1999-12-09 09:22:00	1.33	RB1 Schaprode w.	1997-08-11 15:06:00	2.9	3.6
WB5 Innenreede w.	2008-02-25 10:29:00	30.22	WB5 Innenreede w.	2008-05-28 09:55:00	0.68	WB5 Innenreede w.	2009-04-21 16:22:00	0.7	4																					DB6 Barth oe.	2005-03-22 08:30:00	178	DB6 Barth oe.	2005-01-17 10:30:00	2.6	DB6 Barth oe.	2008-04-10 07:30:00	60.5	0.4	RB1 Schaprode w.	2000-01-19 09:30:00	30.8	RB1 Schaprode w.	2000-01-19 09:30:00	0.94	RB1 Schaprode w.	1997-09-11 09:08:00	4.3	2
WB5 Innenreede w.	2008-03-03 10:18:00	27.32	WB5 Innenreede w.	2008-07-08 14:38:00	0.95	WB5 Innenreede w.	2009-06-10 14:55:00	1.3	3.5																					DB6 Barth oe.	2005-04-26 07:20:00	140	DB6 Barth oe.	2005-02-21 09:10:00	2.51	DB6 Barth oe.	2008-05-15 07:30:00	73.3	0.3	RB1 Schaprode w.	2000-02-28 09:24:00	53.7	RB1 Schaprode w.	2000-02-28 09:24:00	1.77	RB1 Schaprode w.	1997-10-28 09:13:00	0.9	3.7
WB5 Innenreede w.	2008-05-28 09:55:00	20.14	WB5 Innenreede w.	2008-08-27 09:00:00	1.19	WB5 Innenreede w.	2009-07-14 15:00:00	2.1	5.5																					DB6 Barth oe.	2005-05-18 07:35:00	144	DB6 Barth oe.	2005-03-22 08:30:00	3.16	DB6 Barth oe.	2008-06-17 07:00:00	41.4	0.3	RB1 Schaprode w.	2000-03-06 09:13:00	33.1	RB1 Schaprode w.	2000-03-06 09:13:00	0.27	RB1 Schaprode w.	1997-11-24 09:21:00	1.6	3.5
WB5 Innenreede w.	2008-07-08 14:38:00	22.14	WB5 Innenreede w.	2009-01-20 14:46:00	1.16	WB5 Innenreede w.	2009-08-19 14:25:00	3.4	5																					DB6 Barth oe.	2005-06-20 08:00:00	139	DB6 Barth oe.	2005-04-26 07:20:00	3.19	DB6 Barth oe.	2008-07-16 07:40:00	68	0.3	RB1 Schaprode w.	2000-04-06 09:25:00	22.9	RB1 Schaprode w.	2000-04-06 09:25:00	0.71	RB1 Schaprode w.	1997-12-15 10:16:00	4.5	1.5
WB5 Innenreede w.	2008-08-27 09:00:00	18.68	WB5 Innenreede w.	2009-02-17 14:18:00	1.38	WB5 Innenreede w.	2009-09-16 14:20:00	3.8	4																					DB6 Barth oe.	2005-07-25 09:22:00	121	DB6 Barth oe.	2005-05-18 07:35:00	2.9	DB6 Barth oe.	2008-08-11 12:00:00	92	0.3	RB1 Schaprode w.	2000-05-09 17:05:00	36.5	RB1 Schaprode w.	2000-05-09 17:05:00	1.07	RB1 Schaprode w.	1998-03-02 10:47:00	8.1	0.9
WB5 Innenreede w.	2009-01-20 14:46:00	22.21	WB5 Innenreede w.	2009-04-21 16:22:00	1.28	WB5 Innenreede w.	2009-10-21 14:39:00	1.6	5																					DB6 Barth oe.	2005-08-22 08:32:00	66.9	DB6 Barth oe.	2005-06-20 08:00:00	3.11	DB6 Barth oe.	2008-09-25 09:00:00	61.7	0.5	RB1 Schaprode w.	2000-06-22 09:05:00	43.7	RB1 Schaprode w.	2000-06-22 09:05:00	1.14	RB1 Schaprode w.	1998-03-12 13:26:00	0.6	2.6
WB5 Innenreede w.	2009-02-17 14:18:00	22.53	WB5 Innenreede w.	2009-06-10 14:55:00	0.83	WB5 Innenreede w.	2009-11-11 14:14:00	1.9	4.5																					DB6 Barth oe.	2005-09-19 07:57:00	76.8	DB6 Barth oe.	2005-07-25 09:22:00	2.66	DB6 Barth oe.	2008-10-15 08:20:00	45.1	0.5	RB1 Schaprode w.	2000-07-27 09:10:00	27.5	RB1 Schaprode w.	2000-07-27 09:10:00	0.77	RB1 Schaprode w.	1998-05-13 09:50:00	1.9	2.2
WB5 Innenreede w.	2009-04-21 16:22:00	16.62	WB5 Innenreede w.	2009-07-14 15:00:00	0.85	WB5 Innenreede w.	2010-03-17 14:31:00	4.4	5.5																					DB6 Barth oe.	2005-10-10 07:45:00	87.6	DB6 Barth oe.	2005-08-22 08:32:00	11.07	DB6 Barth oe.	2008-11-06 07:30:00	37.9	0.6	RB1 Schaprode w.	2000-08-15 09:10:00	26.7	RB1 Schaprode w.	2000-08-15 09:10:00	0.26	RB1 Schaprode w.	1998-06-18 09:20:00	19	0.5
WB5 Innenreede w.	2009-06-10 14:55:00	19.96	WB5 Innenreede w.	2009-08-19 14:25:00	0.92	WB5 Innenreede w.	2010-04-14 16:28:00	2.5	4.5																					DB6 Barth oe.	2005-11-07 08:00:00	101	DB6 Barth oe.	2005-09-19 07:57:00	1.97	DB6 Barth oe.	2009-02-24 10:00:00	18.6	1.9	RB1 Schaprode w.	2000-09-11 09:10:00	27.3	RB1 Schaprode w.	2000-09-11 09:10:00	0.29	RB1 Schaprode w.	1998-07-06 07:50:00	15.9	0.8
WB5 Innenreede w.	2009-07-14 15:00:00	22.24	WB5 Innenreede w.	2009-09-16 14:20:00	1.36	WB5 Innenreede w.	2010-05-19 15:43:00	1	4																					DB6 Barth oe.	2005-12-07 09:30:00	99.8	DB6 Barth oe.	2005-10-10 07:45:00	3.24	DB6 Barth oe.	2009-03-12 09:00:00	47	0.4	RB1 Schaprode w.	2000-10-26 09:17:00	33.3	RB1 Schaprode w.	2000-10-26 09:17:00	0.36	RB1 Schaprode w.	1998-08-06 08:38:00	10.8	1.3
WB5 Innenreede w.	2009-08-19 14:25:00	23.46	WB5 Innenreede w.	2009-10-21 14:39:00	0.98	WB5 Innenreede w.	2010-06-15 15:39:00	3.5	3.3																					DB6 Barth oe.	2006-03-30 08:05:00	186	DB6 Barth oe.	2005-11-07 08:00:00	2.42	DB6 Barth oe.	2009-04-14 10:05:00	54.2	0.3	RB1 Schaprode w.	2000-11-30 09:00:00	31.7	RB1 Schaprode w.	2000-11-30 09:00:00	1.06	RB1 Schaprode w.	1998-09-28 10:15:00	2.5	3.5
WB5 Innenreede w.	2009-09-16 14:20:00	22.69	WB5 Innenreede w.	2009-11-11 14:14:00	1.28	WB5 Innenreede w.	2010-07-13 15:36:00	3.9	3																					DB6 Barth oe.	2006-04-19 14:00:00	210	DB6 Barth oe.	2005-12-07 09:30:00	3.74	DB6 Barth oe.	2009-05-11 08:20:00	83.4	0.3	RB1 Schaprode w.	2001-01-03 09:31:00	29.7	RB1 Schaprode w.	2001-01-03 09:31:00	3.35	RB1 Schaprode w.	1998-10-27 09:20:00	8.8	1.1
WB5 Innenreede w.	2009-10-21 14:39:00	16.94	WB5 Innenreede w.	2010-03-17 14:31:00	0.67	WB5 Innenreede w.	2010-08-18 13:58:00	11.5	3																					DB6 Barth oe.	2006-05-11 07:45:00	150	DB6 Barth oe.	2006-03-30 08:05:00	2.71	DB6 Barth oe.	2009-06-08 07:30:00	44.4	0.3	RB1 Schaprode w.	2001-02-01 09:24:00	27.4	RB1 Schaprode w.	2001-02-01 09:24:00	0.43	RB1 Schaprode w.	1999-01-28 09:12:00	6.5	1.9
WB5 Innenreede w.	2009-11-11 14:14:00	19.9	WB5 Innenreede w.	2010-04-14 16:28:00	0.57	WB5 Innenreede w.	2010-10-19 16:01:02	1.7	5																					DB6 Barth oe.	2006-06-12 08:30:00	132	DB6 Barth oe.	2006-04-19 14:00:00	4.78	DB6 Barth oe.	2009-07-06 06:55:00	22.6	0.3	RB1 Schaprode w.	2001-03-01 08:31:00	20.2	RB1 Schaprode w.	2001-03-01 08:31:00	0.91	RB1 Schaprode w.	1999-03-03 09:01:00	5.3	1.2
WB5 Innenreede w.	2010-03-17 14:31:00	41.74	WB5 Innenreede w.	2010-05-19 15:43:00	0.51	WB5 Innenreede w.	2010-11-16 17:29:25	0.7	5.5																					DB6 Barth oe.	2006-07-05 07:20:00	119	DB6 Barth oe.	2006-05-11 07:45:00	4.54	DB6 Barth oe.	2009-08-04 09:55:00	33.7	0.4	RB1 Schaprode w.	2001-04-23 09:41:00	35.7	RB1 Schaprode w.	2001-04-23 09:41:00	2.46	RB1 Schaprode w.	1999-05-31 09:02:00	13	1.5
WB5 Innenreede w.	2010-04-14 16:28:00	21.45	WB5 Innenreede w.	2010-06-15 15:39:00	0.56	WB5 Innenreede w.	2011-01-11 13:42:32	0.6	5.5																					DB6 Barth oe.	2006-08-07 10:17:00	135	DB6 Barth oe.	2006-06-12 08:30:00	5.04	DB6 Barth oe.	2009-09-21 07:10:00	27.9	0.5	RB1 Schaprode w.	2001-05-29 08:51:00	31.5	RB1 Schaprode w.	2001-05-29 08:51:00	0.96	RB1 Schaprode w.	1999-06-17 09:20:00	10	1
WB5 Innenreede w.	2010-05-19 15:43:00	18.02	WB5 Innenreede w.	2010-07-13 15:36:00	0.8	WB5 Innenreede w.	2011-02-01 14:36:50	1.3	4.5																					DB6 Barth oe.	2006-09-07 07:15:00	95.2	DB6 Barth oe.	2006-07-05 07:20:00	2.37	DB6 Barth oe.	2009-10-05 09:05:00	49.2	0.3	RB1 Schaprode w.	2001-06-28 09:21:00	26.5	RB1 Schaprode w.	2001-06-28 09:21:00	0.67	RB1 Schaprode w.	1999-07-08 09:21:00	16.4	1.1
WB5 Innenreede w.	2010-06-15 15:39:00	20.2	WB5 Innenreede w.	2010-08-18 13:58:00	1.32	WB5 Innenreede w.	2011-03-09 14:38:11	9.6	3.5																					DB6 Barth oe.	2006-10-25 08:00:00	91.4	DB6 Barth oe.	2006-08-07 10:17:00	3.07	DB6 Barth oe.	2009-11-16 08:45:00	69.2	0.4	RB1 Schaprode w.	2001-07-24 09:16:00	50.4	RB1 Schaprode w.	2001-07-24 09:16:00	1.94	RB1 Schaprode w.	1999-08-11 09:01:00	15.1	1.8
WB5 Innenreede w.	2010-07-13 15:36:00	21.93	WB5 Innenreede w.	2010-10-19 16:01:02	0.67	WB5 Innenreede w.	2011-04-05 14:13:21	1.7	4.5																					DB6 Barth oe.	2006-11-22 07:50:00	28.8	DB6 Barth oe.	2006-09-07 07:15:00	2.03	DB6 Barth oe.	2009-12-10 08:30:00	60.6	0.4	RB1 Schaprode w.	2001-08-21 09:36:00	34.6	RB1 Schaprode w.	2001-08-21 09:36:00	1.28	RB1 Schaprode w.	1999-09-30 09:15:00	17.8	1.2
WB5 Innenreede w.	2010-08-18 13:58:00	28.14	WB5 Innenreede w.	2010-11-16 17:29:25	1.144	WB5 Innenreede w.	2011-05-24 15:30:10	2.3	3.5																					DB6 Barth oe.	2006-12-12 09:03:00	117	DB6 Barth oe.	2006-10-25 08:00:00	2.2	DB6 Barth oe.	2010-03-22 08:50:00	24.9	1	RB1 Schaprode w.	2001-09-12 16:18:00	24.4	RB1 Schaprode w.	2001-09-12 16:18:00	0.62	RB1 Schaprode w.	1999-11-11 09:25:00	9.4	2.2
WB5 Innenreede w.	2010-10-19 16:01:02	17.552	WB5 Innenreede w.	2011-01-11 13:42:32	0.948	WB5 Innenreede w.	2011-06-29 09:30:17	2.4	4.5																					DB6 Barth oe.	2007-01-22 09:16:00	122	DB6 Barth oe.	2006-11-22 07:50:00	2.64	DB6 Barth oe.	2010-04-26 08:30:00	145	0.3	RB1 Schaprode w.	2001-10-01 09:14:00	31.4	RB1 Schaprode w.	2001-10-01 09:14:00	1.37	RB1 Schaprode w.	2000-01-19 09:30:00	3.3	0.8
WB5 Innenreede w.	2010-11-16 17:29:25	26.204	WB5 Innenreede w.	2011-02-01 14:36:50	1.274	WB5 Innenreede w.	2011-07-12 15:36:15	2.4	3.5																					DB6 Barth oe.	2007-02-07 08:08:00	112	DB6 Barth oe.	2006-12-12 09:03:00	2.55	DB6 Barth oe.	2010-05-26 09:35:00	142	0.2	RB1 Schaprode w.	2001-11-22 09:25:00	28.9	RB1 Schaprode w.	2001-11-22 09:25:00	1.17	RB1 Schaprode w.	2000-02-28 09:24:00	5	1.8
WB5 Innenreede w.	2011-01-11 13:42:32	32.232	WB5 Innenreede w.	2011-03-09 14:38:11	2.87	WB5 Innenreede w.	2011-08-24 14:30:38	4.5	3.8																					DB6 Barth oe.	2007-03-12 07:15:00	227	DB6 Barth oe.	2007-01-22 09:16:00	11.72	DB6 Barth oe.	2010-06-24 07:40:00	63	0.3	RB1 Schaprode w.	2002-01-31 09:16:00	33.5	RB1 Schaprode w.	2002-01-31 09:16:00	0.96	RB1 Schaprode w.	2000-03-06 09:13:00	4.7	1.2
WB5 Innenreede w.	2011-02-01 14:36:50	47.538	WB5 Innenreede w.	2011-04-05 14:13:21	0.36	WB5 Innenreede w.	2011-09-20 15:40:19	3.1	4																					DB6 Barth oe.	2007-04-12 08:20:00	178	DB6 Barth oe.	2007-02-07 08:08:00	1.46	DB6 Barth oe.	2010-07-13 09:55:00	55.9	0.45	RB1 Schaprode w.	2002-02-11 09:12:00	77.8	RB1 Schaprode w.	2002-02-11 09:12:00	0.97	RB1 Schaprode w.	2000-04-06 09:25:00	3.5	1.2
WB5 Innenreede w.	2011-03-09 14:38:11	23.888	WB5 Innenreede w.	2011-05-24 15:30:10	0.72	WB5 Innenreede w.	2012-01-17 15:41:00	0.3	3																					DB6 Barth oe.	2007-05-23 07:30:00	103	DB6 Barth oe.	2007-03-12 07:15:00	4.36	DB6 Barth oe.	2010-08-16 10:47:00	48.9	0.5	RB1 Schaprode w.	2002-03-27 09:06:00	19.6	RB1 Schaprode w.	2002-03-27 09:06:00	0.24	RB1 Schaprode w.	2000-05-09 17:05:00	5.9	1.8
WB5 Innenreede w.	2011-04-05 14:13:21	18.851	WB5 Innenreede w.	2011-06-29 09:30:17	0.541	WB5 Innenreede w.	2012-03-06 13:27:00	1	6																					DB6 Barth oe.	2007-06-21 07:50:00	119	DB6 Barth oe.	2007-04-12 08:20:00	1.58	DB6 Barth oe.	2010-09-13 07:55:00	61.4	0.4	RB1 Schaprode w.	2002-04-25 09:00:00	27.5	RB1 Schaprode w.	2002-04-25 09:00:00	0.48	RB1 Schaprode w.	2000-06-22 09:05:00	10.6	1.2
WB5 Innenreede w.	2011-05-24 15:30:10	20.319	WB5 Innenreede w.	2011-07-12 15:36:15	1.334	WB5 Innenreede w.	2012-05-09 08:59:00	0.3	5.5																					DB6 Barth oe.	2007-07-09 10:20:00	73	DB6 Barth oe.	2007-05-23 07:30:00	2.92	DB6 Barth oe.	2010-10-11 08:00:00	93.8	0.3	RB1 Schaprode w.	2002-05-16 09:31:00	29.9	RB1 Schaprode w.	2002-05-16 09:31:00	2.23	RB1 Schaprode w.	2000-07-27 09:10:00	3.9	2.1
WB5 Innenreede w.	2011-06-29 09:30:17	22.629	WB5 Innenreede w.	2011-08-24 14:30:38	0.611	WB5 Innenreede w.	2012-06-06 15:30:00	1.7	3.5																					DB6 Barth oe.	2007-08-13 11:20:00	94.83	DB6 Barth oe.	2007-06-21 07:50:00	4.54	DB6 Barth oe.	2010-11-16 11:50:00	67.4	0.4	RB1 Schaprode w.	2002-06-25 13:26:00	66.7	RB1 Schaprode w.	2002-06-25 13:26:00	2.23	RB1 Schaprode w.	2000-08-15 09:10:00	1.6	3.8
WB5 Innenreede w.	2011-07-12 15:36:15	22.133	WB5 Innenreede w.	2011-09-20 15:40:19	0.578	WB5 Innenreede w.	2012-07-03 15:43:00	2.7	2.5																					DB6 Barth oe.	2007-09-05 10:32:00	85.94	DB6 Barth oe.	2007-07-09 10:20:00	2.67	DB6 Barth oe.	2011-02-09 10:25:00	82.6	0.2	RB1 Schaprode w.	2002-08-13 13:30:00	43.1	RB1 Schaprode w.	2002-08-13 13:30:00	1.81	RB1 Schaprode w.	2000-09-11 09:10:00	2.2	3.5
WB5 Innenreede w.	2011-08-24 14:30:38	23.207	WB5 Innenreede w.	2012-01-17 15:41:00	1.11	WB5 Innenreede w.	2012-08-14 14:39:11	2.2	3.5																					DB6 Barth oe.	2007-10-11 07:50:00	85.76	DB6 Barth oe.	2007-08-13 11:20:00	2.98	DB6 Barth oe.	2011-03-28 07:25:00	52.8	0.4	RB1 Schaprode w.	2002-09-26 15:20:00	31.1	RB1 Schaprode w.	2002-09-26 15:20:00	0.94	RB1 Schaprode w.	2000-10-26 09:17:00	5.8	1.3
WB5 Innenreede w.	2011-09-20 15:40:19	18.429	WB5 Innenreede w.	2012-03-06 13:27:00	0.88	WB5 Innenreede w.	2012-09-04 16:52:00	3.7	3																					DB6 Barth oe.	2007-11-21 08:50:00	113	DB6 Barth oe.	2007-09-05 10:32:00	2.43	DB6 Barth oe.	2011-04-26 11:00:00	55.3	0.35	RB1 Schaprode w.	2002-11-25 09:20:00	33.4	RB1 Schaprode w.	2002-11-25 09:20:00	0.54	RB1 Schaprode w.	2000-11-30 09:00:00	2.9	3.8
WB5 Innenreede w.	2012-01-17 15:41:00	32.5	WB5 Innenreede w.	2012-05-09 08:59:00	0.34	WB5 Innenreede w.	2013-04-03 14:50:00	0.7	5																					DB6 Barth oe.	2008-01-21 08:20:00	201.66	DB6 Barth oe.	2007-10-11 07:50:00	5.41	DB6 Barth oe.	2011-05-10 11:00:00	68.9	0.3	RB1 Schaprode w.	2003-04-10 12:01:00	26.6	RB1 Schaprode w.	2003-04-10 12:01:00	0.84	RB1 Schaprode w.	2001-01-03 09:31:00	3	3.6
WB5 Innenreede w.	2012-03-06 13:27:00	28.76	WB5 Innenreede w.	2012-06-06 15:30:00	1.24	WB5 Innenreede w.	2013-05-14 15:47:00	1.1	5.5																					DB6 Barth oe.	2008-02-14 08:30:00	179.86	DB6 Barth oe.	2007-11-21 08:50:00	8.44	DB6 Barth oe.	2011-06-14 10:00:00	24.3	0.2	RB1 Schaprode w.	2003-05-08 10:00:00	42.3	RB1 Schaprode w.	2003-05-08 10:00:00	0.42	RB1 Schaprode w.	2001-02-01 09:24:00	3.7	3.6
WB5 Innenreede w.	2012-05-09 08:59:00	9.57	WB5 Innenreede w.	2012-07-03 15:43:00	0.88	WB5 Innenreede w.	2013-06-18 14:18:00	2.4	3.5																					DB6 Barth oe.	2008-03-19 08:15:00	160.15	DB6 Barth oe.	2008-01-21 08:20:00	7.89	DB6 Barth oe.	2011-07-04 10:45:00	29.2	0.5	RB1 Schaprode w.	2003-07-30 12:45:00	34.3	RB1 Schaprode w.	2003-07-30 12:45:00	1.53	RB1 Schaprode w.	2001-03-01 08:31:00	1.5	3.3
WB5 Innenreede w.	2012-06-06 15:30:00	10.61	WB5 Innenreede w.	2012-08-14 14:39:11	1	WB5 Innenreede w.	2013-07-02 15:32:00	2.9	5																					DB6 Barth oe.	2008-04-10 07:30:00	216.08	DB6 Barth oe.	2008-02-14 08:30:00	2.91	DB6 Barth oe.	2011-08-02 10:00:00	89.3	0.35	RB1 Schaprode w.	2003-08-07 11:50:00	20.6	RB1 Schaprode w.	2003-08-07 11:50:00	3.58	RB1 Schaprode w.	2001-04-23 09:41:00	2.2	3
WB5 Innenreede w.	2012-07-03 15:43:00	19.97	WB5 Innenreede w.	2012-09-04 16:52:00	1.32	WB5 Innenreede w.	2013-08-21 14:47:00	5.7	3																					DB6 Barth oe.	2008-05-15 07:30:00	120.44	DB6 Barth oe.	2008-03-19 08:15:00	1.8	DB6 Barth oe.	2011-09-06 09:00:00	101.7	0.35	RB1 Schaprode w.	2004-02-16 09:45:00	27.4	RB1 Schaprode w.	2004-02-16 09:45:00	0.57	RB1 Schaprode w.	2001-05-29 08:51:00	3.1	2.2
WB5 Innenreede w.	2012-08-14 14:39:11	15.62	WB5 Innenreede w.	2013-04-03 14:50:00	0.6	WB5 Innenreede w.	2013-09-11 15:13:00	6.2	4																					DB6 Barth oe.	2008-06-17 07:00:00	123.88	DB6 Barth oe.	2008-04-10 07:30:00	2.9	DB6 Barth oe.	2011-10-17 09:00:00	50.5	0.45	RB1 Schaprode w.	2004-03-17 10:20:00	48.8	RB1 Schaprode w.	2004-03-17 10:20:00	0.71	RB1 Schaprode w.	2001-06-28 09:21:00	1.4	3.9
WB5 Innenreede w.	2012-09-04 16:52:00	23.31	WB5 Innenreede w.	2013-05-14 15:47:00	0.38	WB5 Innenreede w.	2013-10-08 15:47:00	2.4	7.5																					DB6 Barth oe.	2008-07-16 07:40:00	135.42	DB6 Barth oe.	2008-05-15 07:30:00	3.87	DB6 Barth oe.	2011-11-07 09:00:00	56.7	0.5	RB1 Schaprode w.	2004-04-27 08:18:00	28.1	RB1 Schaprode w.	2004-04-27 08:18:00	0.96	RB1 Schaprode w.	2001-07-24 09:16:00	7.1	2.2
WB5 Innenreede w.	2013-04-03 14:50:00	23.6	WB5 Innenreede w.	2013-06-18 14:18:00	2.29	WB5 Innenreede w.	2013-11-12 15:45:00	1.9	5																					DB6 Barth oe.	2008-08-11 12:00:00	118.08	DB6 Barth oe.	2008-06-17 07:00:00	3.18	DB6 Barth oe.	2011-12-12 08:30:00	51.8	0.45	RB1 Schaprode w.	2004-05-13 08:44:00	31.6	RB1 Schaprode w.	2004-05-13 08:44:00	0.92	RB1 Schaprode w.	2001-08-21 09:36:00	6.5	2.1
WB5 Innenreede w.	2013-05-14 15:47:00	18.36	WB5 Innenreede w.	2013-07-02 15:32:00	0.61	WB5 Innenreede w.	2014-02-26 15:27:00	15.9	3.5																					DB6 Barth oe.	2008-09-25 09:00:00	105.52	DB6 Barth oe.	2008-07-16 07:40:00	4.04	DB6 Barth oe.	2012-01-09 08:30:00	27.7	0.7	RB1 Schaprode w.	2004-06-14 08:32:00	24	RB1 Schaprode w.	2004-06-14 08:32:00	0.88	RB1 Schaprode w.	2001-09-12 16:18:00	2.7	2.2
WB5 Innenreede w.	2013-06-18 14:18:00	19.25	WB5 Innenreede w.	2013-08-21 14:47:00	1.19	WB5 Innenreede w.	2014-06-03 15:35:00	1.6	4.5																					DB6 Barth oe.	2008-10-15 08:20:00	84.82	DB6 Barth oe.	2008-08-11 12:00:00	3.57	DB6 Barth oe.	2012-02-27 09:00:00	41.2	0.5	RB1 Schaprode w.	2004-07-05 08:25:00	19.8	RB1 Schaprode w.	2004-07-05 08:25:00	0.65	RB1 Schaprode w.	2001-10-01 09:14:00	1.8	2.8
WB5 Innenreede w.	2013-07-02 15:32:00	20.47	WB5 Innenreede w.	2013-09-11 15:13:00	1.12	WB5 Innenreede w.	2014-07-16 14:36:00	1.6	3.5																					DB6 Barth oe.	2008-11-06 07:30:00	84.7	DB6 Barth oe.	2008-09-25 09:00:00	2.53	DB6 Barth oe.	2012-03-15 09:00:00	34.4	0.7	RB1 Schaprode w.	2004-08-10 13:34:00	39	RB1 Schaprode w.	2004-08-10 13:34:00	1.37	RB1 Schaprode w.	2001-11-22 09:25:00	8	0.5
WB5 Innenreede w.	2013-08-21 14:47:00	25.08	WB5 Innenreede w.	2013-10-08 15:47:00	0.52	WB5 Innenreede w.	2014-09-09 16:10:00	1.6	3.5																					DB6 Barth oe.	2009-02-24 10:00:00	189.39	DB6 Barth oe.	2008-10-15 08:20:00	1.01	DB6 Barth oe.	2012-04-02 08:50:00	58.6	0.6	RB1 Schaprode w.	2004-09-23 08:19:00	48.2	RB1 Schaprode w.	2004-09-23 08:19:00	1.43	RB1 Schaprode w.	2002-01-31 09:16:00	6.2	1.2
WB5 Innenreede w.	2013-09-11 15:13:00	23.21	WB5 Innenreede w.	2013-11-12 15:45:00	0.81	WB5 Innenreede w.	2014-10-22 15:40:00	5.1	4.5																					DB6 Barth oe.	2009-03-12 09:00:00	104.84	DB6 Barth oe.	2008-11-06 07:30:00	2.45	DB6 Barth oe.	2012-05-07 10:25:00	39.6	0.5	RB1 Schaprode w.	2004-10-28 08:21:00	33.8	RB1 Schaprode w.	2004-10-28 08:21:00	0.78	RB1 Schaprode w.	2002-02-11 09:12:00	6.8	1.6
WB5 Innenreede w.	2013-10-08 15:47:00	18.05	WB5 Innenreede w.	2014-02-26 15:27:00	0.84	WB5 Innenreede w.	2014-11-10 11:19:00	4.1	5.5																					DB6 Barth oe.	2009-04-14 10:05:00	91.25	DB6 Barth oe.	2009-02-24 10:00:00	2.56	DB6 Barth oe.	2012-06-13 09:45:00	26.4	0.6	RB1 Schaprode w.	2004-11-17 08:30:00	35.2	RB1 Schaprode w.	2004-11-17 08:30:00	0.81	RB1 Schaprode w.	2002-03-27 09:06:00	3.7	4
WB5 Innenreede w.	2013-11-12 15:45:00	20.18	WB5 Innenreede w.	2014-06-03 15:35:00	0.53	WB5 Innenreede w.	2015-02-18 15:37:00	53.9	1.6																					DB6 Barth oe.	2009-05-11 08:20:00	41.08	DB6 Barth oe.	2009-03-12 09:00:00	2.74	DB6 Barth oe.	2012-07-09 08:00:00	14.8	0.6	RB1 Schaprode w.	2004-12-15 08:44:00	30.5	RB1 Schaprode w.	2004-12-15 08:44:00	0.62	RB1 Schaprode w.	2002-04-25 09:00:00	2.2	3.3
WB5 Innenreede w.	2014-02-26 15:27:00	29.38	WB5 Innenreede w.	2014-07-16 14:36:00	1.07	WB5 Innenreede w.	2015-03-10 15:13:00	10.2	2.5																					DB6 Barth oe.	2009-06-08 07:30:00	91.74	DB6 Barth oe.	2009-04-14 10:05:00	3.01	DB6 Barth oe.	2012-08-06 07:30:00	31.7	0.5	RB1 Schaprode w.	2005-01-19 08:52:00	42.6	RB1 Schaprode w.	2005-01-19 08:52:00	0.74	RB1 Schaprode w.	2002-05-16 09:31:00	2	3.5
WB5 Innenreede w.	2014-06-03 15:35:00	21.06	WB5 Innenreede w.	2014-09-09 16:10:00	0.99	WB5 Innenreede w.	2015-04-22 13:25:00	2	4.5																					DB6 Barth oe.	2009-07-06 06:55:00	102.08	DB6 Barth oe.	2009-05-11 08:20:00	3.05	DB6 Barth oe.	2012-09-18 09:45:00	35.1	0.7	RB1 Schaprode w.	2005-02-16 08:21:00	29.5	RB1 Schaprode w.	2005-02-16 08:21:00	0.99	RB1 Schaprode w.	2002-06-25 13:26:00	22.7	1
WB5 Innenreede w.	2014-07-16 14:36:00	24.54	WB5 Innenreede w.	2014-10-22 15:40:00	0.88	WB5 Innenreede w.	2015-06-16 16:06:00	1.3	5																					DB6 Barth oe.	2009-08-04 09:55:00	33.04	DB6 Barth oe.	2009-06-08 07:30:00	1.49	DB6 Barth oe.	2012-10-16 09:55:00	33.6	0.6	RB1 Schaprode w.	2005-03-22 14:40:00	29	RB1 Schaprode w.	2005-03-22 14:40:00	0.26	RB1 Schaprode w.	2002-08-13 13:30:00	14.2	1.7
WB5 Innenreede w.	2014-09-09 16:10:00	19.94	WB5 Innenreede w.	2014-11-10 11:19:00	1.1	WB5 Innenreede w.	2015-07-14 15:39:00	1.8	4.5																					DB6 Barth oe.	2009-09-21 07:10:00	58.49	DB6 Barth oe.	2009-07-06 06:55:00	3.29	DB6 Barth oe.	2012-11-06 09:30:00	45	0.5	RB1 Schaprode w.	2005-04-26 08:50:00	33.5	RB1 Schaprode w.	2005-04-26 08:50:00	0.84	RB1 Schaprode w.	2002-09-26 15:20:00	2.4	3.2
WB5 Innenreede w.	2014-10-22 15:40:00	19.28	WB5 Innenreede w.	2015-02-18 15:37:00	1.06	WB5 Innenreede w.	2015-09-15 16:42:00	4.2	3																					DB6 Barth oe.	2009-10-05 09:05:00	98.12	DB6 Barth oe.	2009-08-04 09:55:00	1.49	DB6 Barth oe.	2013-01-08 09:10:00	51.4	0.5	RB1 Schaprode w.	2005-05-19 13:43:00	29.7	RB1 Schaprode w.	2005-05-19 13:43:00	0.99	RB1 Schaprode w.	2002-11-25 09:20:00	3.6	4.5
WB5 Innenreede w.	2014-11-10 11:19:00	20.51	WB5 Innenreede w.	2015-03-10 15:13:00	1.11	WB5 Innenreede w.	2015-12-15 15:15:00	1.7	5.5																					DB6 Barth oe.	2009-11-16 08:45:00	100.89	DB6 Barth oe.	2009-09-21 07:10:00	1.75	DB6 Barth oe.	2013-04-17 09:45:00	105.2	0.4	RB1 Schaprode w.	2005-06-13 08:25:00	25.2	RB1 Schaprode w.	2005-06-13 08:25:00	0.72	RB1 Schaprode w.	2003-04-10 12:01:00	1.6	2.2
WB5 Innenreede w.	2015-02-18 15:37:00	31.36	WB5 Innenreede w.	2015-04-22 13:25:00	0.42	WB5 Innenreede w.	2016-01-05 14:21:00	0.5	6.5																					DB6 Barth oe.	2009-12-10 08:30:00	52.5	DB6 Barth oe.	2009-10-05 09:05:00	2.54	DB6 Barth oe.	2013-05-23 10:55:00	67.1	0.3	RB1 Schaprode w.	2005-07-12 08:16:00	43.1	RB1 Schaprode w.	2005-07-12 08:16:00	1.54	RB1 Schaprode w.	2003-05-08 10:00:00	3.3	3.5
WB5 Innenreede w.	2015-03-10 15:13:00	22.47	WB5 Innenreede w.	2015-06-16 16:06:00	1.09	WB5 Innenreede w.	2016-03-08 08:45:00	8.1	4																					DB6 Barth oe.	2010-03-22 08:50:00	284	DB6 Barth oe.	2009-11-16 08:45:00	2.34	DB6 Barth oe.	2013-06-10 11:00:00	46.8	0.3	RB1 Schaprode w.	2005-08-16 13:14:00	34.4	RB1 Schaprode w.	2005-08-16 13:14:00	1	RB1 Schaprode w.	2003-07-30 12:45:00	6.2	1.9
WB5 Innenreede w.	2015-04-22 13:25:00	19.71	WB5 Innenreede w.	2015-07-14 15:39:00	0.64	WB5 Innenreede w.	2016-05-10 16:19:00	0.4	6																					DB6 Barth oe.	2010-04-26 08:30:00	175.54	DB6 Barth oe.	2009-12-10 08:30:00	2.62	DB6 Barth oe.	2013-07-08 10:15:00	27.5	0.4	RB1 Schaprode w.	2005-09-13 08:17:00	32.7	RB1 Schaprode w.	2005-09-13 08:17:00	1.07	RB1 Schaprode w.	2003-08-07 11:50:00	10.2	2.5
WB5 Innenreede w.	2015-06-16 16:06:00	18.93	WB5 Innenreede w.	2015-09-15 16:42:00	1.47	WB5 Innenreede w.	2016-06-07 15:39:00	1.1	4																					DB6 Barth oe.	2010-05-26 09:35:00	232	DB6 Barth oe.	2010-03-22 08:50:00	2.43	DB6 Barth oe.	2013-08-22 08:15:00	68.7	0.5	RB1 Schaprode w.	2005-10-18 08:21:00	33.7	RB1 Schaprode w.	2005-10-18 08:21:00	0.97	RB1 Schaprode w.	2004-02-16 09:45:00	2.8	3.8
WB5 Innenreede w.	2015-07-14 15:39:00	19.7	WB5 Innenreede w.	2015-12-15 15:15:00	1.43	WB5 Innenreede w.	2016-08-23 15:31:00	3.9	3.5																					DB6 Barth oe.	2010-06-24 07:40:00	137	DB6 Barth oe.	2010-04-26 08:30:00	3.43	DB6 Barth oe.	2013-09-18 08:15:00	115.5	0.3	RB1 Schaprode w.	2005-11-01 13:40:00	30.5	RB1 Schaprode w.	2005-11-01 13:40:00	0.68	RB1 Schaprode w.	2004-03-17 10:20:00	4.7	3
WB5 Innenreede w.	2015-09-15 16:42:00	22	WB5 Innenreede w.	2016-01-05 14:21:00	1.21	WB5 Innenreede w.	2016-09-13 15:19:00	3.4	3																					DB6 Barth oe.	2010-07-13 09:55:00	109	DB6 Barth oe.	2010-05-26 09:35:00	4.52	DB6 Barth oe.	2013-10-07 10:00:00	113.5	0.4	RB1 Schaprode w.	2005-12-07 09:06:00	26	RB1 Schaprode w.	2005-12-07 09:06:00	1.06	RB1 Schaprode w.	2004-04-27 08:18:00	6.5	3.1
WB5 Innenreede w.	2015-12-15 15:15:00	24.03	WB5 Innenreede w.	2016-03-08 08:45:00	0.72	WB5 Innenreede w.	2016-11-09 15:35:00	2.4	3.5																					DB6 Barth oe.	2010-08-16 10:47:00	95.49	DB6 Barth oe.	2010-06-24 07:40:00	2.72	DB6 Barth oe.	2013-11-11 09:05:00	43.7	0.6	RB1 Schaprode w.	2006-04-19 08:45:00	28.1	RB1 Schaprode w.	2006-04-19 08:45:00	0.66	RB1 Schaprode w.	2004-05-13 08:44:00	6.1	3
WB5 Innenreede w.	2016-01-05 14:21:00	23.39	WB5 Innenreede w.	2016-05-10 16:19:00	0.37	WB5 Innenreede w.	2016-12-13 15:20:00	2	7.5																					DB6 Barth oe.	2010-09-13 07:55:00	96.76	DB6 Barth oe.	2010-07-13 09:55:00	2.62	DB6 Barth oe.	2013-12-09 09:00:00	58.3	0.4	RB1 Schaprode w.	2006-05-10 08:36:00	30.4	RB1 Schaprode w.	2006-05-10 08:36:00	1.3	RB1 Schaprode w.	2004-06-14 08:32:00	3.3	3.8
WB5 Innenreede w.	2016-03-08 08:45:00	25.16	WB5 Innenreede w.	2016-06-07 15:39:00	0.6	WB5 Innenreede w.	2017-01-17 15:25:00	0.5	4.5																					DB6 Barth oe.	2010-10-11 08:00:00	119	DB6 Barth oe.	2010-08-16 10:47:00	1.73	DB6 Barth oe.	2014-01-13 09:00:00	26.6	0.6	RB1 Schaprode w.	2006-06-15 12:15:00	31.9	RB1 Schaprode w.	2006-06-15 12:15:00	2.05	RB1 Schaprode w.	2004-07-05 08:25:00	4.7	3.1
WB5 Innenreede w.	2016-05-10 16:19:00	19.19	WB5 Innenreede w.	2016-08-23 15:31:00	1.05	WB5 Innenreede w.	2017-03-28 15:41:00	4.3	3.5																					DB6 Barth oe.	2010-11-16 11:50:00	177.96	DB6 Barth oe.	2010-09-13 07:55:00	1.84	DB6 Barth oe.	2014-02-18 09:20:00	43	0.5	RB1 Schaprode w.	2006-07-17 12:22:00	39.3	RB1 Schaprode w.	2006-07-17 12:22:00	1.73	RB1 Schaprode w.	2004-08-10 13:34:00	10.9	3.3
WB5 Innenreede w.	2016-06-07 15:39:00	19.99	WB5 Innenreede w.	2016-09-13 15:19:00	0.73	WB5 Innenreede w.	2017-04-26 15:40:00	1.3	4.5																					DB6 Barth oe.	2011-02-09 10:25:00	357.202	DB6 Barth oe.	2010-10-11 08:00:00	2.41	DB6 Barth oe.	2014-03-05 09:00:00	35	0.7	RB1 Schaprode w.	2006-08-09 12:30:00	47.1	RB1 Schaprode w.	2006-08-09 12:30:00	1.74	RB1 Schaprode w.	2004-09-23 08:19:00	14.7	1.6
WB5 Innenreede w.	2016-08-23 15:31:00	27.03	WB5 Innenreede w.	2016-11-09 15:35:00	0.74	WB5 Innenreede w.	2017-05-09 15:54:00	1.3	3																					DB6 Barth oe.	2011-03-28 07:25:00	222.98	DB6 Barth oe.	2010-11-16 11:50:00	1.82	DB6 Barth oe.	2014-04-02 09:15:00	51.3	0.4	RB1 Schaprode w.	2006-09-11 09:40:00	26.5	RB1 Schaprode w.	2006-09-11 09:40:00	1.09	RB1 Schaprode w.	2004-10-28 08:21:00	8.5	2.6
WB5 Innenreede w.	2016-09-13 15:19:00	21.15	WB5 Innenreede w.	2016-12-13 15:20:00	1	WB5 Innenreede w.	2017-06-20 15:50:00	1.3	4.5																					DB6 Barth oe.	2011-04-26 11:00:00	122.411	DB6 Barth oe.	2011-02-09 10:25:00	5.036	DB6 Barth oe.	2014-05-19 09:00:00	32.8	0.4	RB1 Schaprode w.	2006-10-05 08:05:00	37.7	RB1 Schaprode w.	2006-10-05 08:05:00	1.51	RB1 Schaprode w.	2004-11-17 08:30:00	17.4	2.6
WB5 Innenreede w.	2016-11-09 15:35:00	20.54	WB5 Innenreede w.	2017-01-17 15:25:00	1.23	WB5 Innenreede w.	2017-07-12 15:38:00	7.2	2.5																					DB6 Barth oe.	2011-05-10 11:00:00	134.518	DB6 Barth oe.	2011-03-28 07:25:00	3.242	DB6 Barth oe.	2014-06-12 11:00:00	43.6	0.4	RB1 Schaprode w.	2006-11-20 08:52:00	24.5	RB1 Schaprode w.	2006-11-20 08:52:00	0.64	RB1 Schaprode w.	2004-12-15 08:44:00	6.4
WB5 Innenreede w.	2016-12-13 15:20:00	20.11	WB5 Innenreede w.	2017-03-28 15:41:00	0.79	WB5 Innenreede w.	2017-08-23 15:51:00	1.4	4.5																					DB6 Barth oe.	2011-06-14 10:00:00	130.689	DB6 Barth oe.	2011-04-26 11:00:00	2.563	DB6 Barth oe.	2014-07-28 07:30:00	46.3	0.5	RB1 Schaprode w.	2006-12-04 08:45:00	25.6	RB1 Schaprode w.	2006-12-04 08:45:00	0.78	RB1 Schaprode w.	2005-01-19 08:52:00	18.2	2.4
WB5 Innenreede w.	2017-01-17 15:25:00	24.47	WB5 Innenreede w.	2017-04-26 15:40:00	0.39	WB5 Innenreede w.	2017-09-12 15:51:00	3.9	3.5																					DB6 Barth oe.	2011-07-04 10:45:00	82.553	DB6 Barth oe.	2011-05-10 11:00:00	2.935	DB6 Barth oe.	2014-08-05 07:00:00	49.3	0.5	RB1 Schaprode w.	2007-01-09 14:30:00	34.29	RB1 Schaprode w.	2007-01-09 14:30:00	1.04	RB1 Schaprode w.	2005-02-16 08:21:00	5.4	0.4
WB5 Innenreede w.	2017-03-28 15:41:00	20.51	WB5 Innenreede w.	2017-05-09 15:54:00	0.44	WB5 Innenreede w.	2017-11-07 15:59:00	7.6	3.5																					DB6 Barth oe.	2011-08-02 10:00:00	155.586	DB6 Barth oe.	2011-06-14 10:00:00	3.206	DB6 Barth oe.	2014-09-08 08:15:00	44.2	0.5	RB1 Schaprode w.	2007-01-29 09:15:00	30.96	RB1 Schaprode w.	2007-01-29 09:15:00	0.64	RB1 Schaprode w.	2005-03-22 14:40:00	10	1.5
WB5 Innenreede w.	2017-04-26 15:40:00	20.31	WB5 Innenreede w.	2017-06-20 15:50:00	0.93	WB5 Innenreede w.	2018-01-16 15:48:00	1.4	6.5																					DB6 Barth oe.	2011-09-06 09:00:00	144.58	DB6 Barth oe.	2011-07-04 10:45:00	2.284	DB6 Barth oe.	2014-10-06 08:45:00	69	0.6	RB1 Schaprode w.	2007-02-12 09:00:00	50.87	RB1 Schaprode w.	2007-02-12 09:00:00	1.63	RB1 Schaprode w.	2005-04-26 08:50:00	6.4	2.7
WB5 Innenreede w.	2017-05-09 15:54:00	20.59	WB5 Innenreede w.	2017-07-12 15:38:00	0.91	WB5 Innenreede w.	2018-02-20 14:56:00	1.1	6.5																					DB6 Barth oe.	2011-10-17 09:00:00	104.84	DB6 Barth oe.	2011-08-02 10:00:00	3.529	DB6 Barth oe.	2014-11-04 09:40:00	60.2	0.5	RB1 Schaprode w.	2007-03-12 08:15:00	43.39	RB1 Schaprode w.	2007-03-12 08:15:00	0.76	RB1 Schaprode w.	2005-05-19 13:43:00	3.6	2.7
WB5 Innenreede w.	2017-06-20 15:50:00	22.41	WB5 Innenreede w.	2017-08-23 15:51:00	0.75	WB5 Innenreede w.	2018-05-15 15:51:00	1	4																					DB6 Barth oe.	2011-11-07 09:00:00	94.559	DB6 Barth oe.	2011-09-06 09:00:00	3.209	DB6 Barth oe.	2014-12-08 08:58:00	38.2	0.5	RB1 Schaprode w.	2007-04-24 08:50:00	24.38	RB1 Schaprode w.	2007-04-24 08:50:00	1.04	RB1 Schaprode w.	2005-06-13 08:25:00	6.1	2.2
WB5 Innenreede w.	2017-07-12 15:38:00	23.82	WB5 Innenreede w.	2017-09-12 15:51:00	0.98	WB5 Innenreede w.	2018-06-05 15:31:00	1.3	5.5																					DB6 Barth oe.	2011-12-12 08:30:00	121.86	DB6 Barth oe.	2011-10-17 09:00:00	2.376	DB6 Barth oe.	2015-01-07 09:10:00	27.2	0.6	RB1 Schaprode w.	2007-05-14 09:21:00	29.13	RB1 Schaprode w.	2007-05-14 09:21:00	1.09	RB1 Schaprode w.	2005-07-12 08:16:00	12.3	1.6
WB5 Innenreede w.	2017-08-23 15:51:00	21.72	WB5 Innenreede w.	2017-11-07 15:59:00	0.69	WB5 Innenreede w.	2018-07-03 15:55:00	1.7	4.5																					DB6 Barth oe.	2012-01-09 08:30:00	112.26	DB6 Barth oe.	2011-11-07 09:00:00	2.071	DB6 Barth oe.	2015-02-18 09:15:00	26.7	0.5	RB1 Schaprode w.	2007-06-11 12:10:00	40.18	RB1 Schaprode w.	2007-06-11 12:10:00	1.47	RB1 Schaprode w.	2005-08-16 13:14:00	4.2	2.9
WB5 Innenreede w.	2017-09-12 15:51:00	22.2	WB5 Innenreede w.	2018-01-16 15:48:00	1.06	WB5 Innenreede w.	2018-09-04 15:46:00	6.5	3																					DB6 Barth oe.	2012-02-27 09:00:00	155.84	DB6 Barth oe.	2011-12-12 08:30:00	2.651	DB6 Barth oe.	2015-03-11 08:30:00	33.6	0.6	RB1 Schaprode w.	2007-07-11 07:52:00	36.17	RB1 Schaprode w.	2007-07-11 07:52:00	1.93	RB1 Schaprode w.	2005-09-13 08:17:00	6.4	2.8
WB5 Innenreede w.	2017-11-07 15:59:00	20.73	WB5 Innenreede w.	2018-02-20 14:56:00	0.96	WB5 Innenreede w.	2018-11-13 15:19:00	3.9	5																					DB6 Barth oe.	2012-03-15 09:00:00	125.09	DB6 Barth oe.	2012-01-09 08:30:00	2.16	DB6 Barth oe.	2015-04-08 08:30:00	58.5	0.4	RB1 Schaprode w.	2007-08-16 08:55:00	42.98	RB1 Schaprode w.	2007-08-16 08:55:00	2.25	RB1 Schaprode w.	2005-10-18 08:21:00	4	2.6
WB5 Innenreede w.	2018-01-16 15:48:00	32.04	WB5 Innenreede w.	2018-05-15 15:51:00	0.72																									DB6 Barth oe.	2012-04-02 08:50:00	108.38	DB6 Barth oe.	2012-02-27 09:00:00	2.94	DB6 Barth oe.	2015-05-06 09:00:00	50.6	0.4	RB1 Schaprode w.	2007-09-13 08:58:00	24.99	RB1 Schaprode w.	2007-09-13 08:58:00	0.76	RB1 Schaprode w.	2005-11-01 13:40:00	3.3	3.8
WB5 Innenreede w.	2018-02-20 14:56:00	33.11	WB5 Innenreede w.	2018-06-05 15:31:00	0.7																									DB6 Barth oe.	2012-05-07 10:25:00	91.14	DB6 Barth oe.	2012-03-15 09:00:00	2.6	DB6 Barth oe.	2015-06-08 09:00:00	46.7	0.3	RB1 Schaprode w.	2007-10-17 09:40:00	23.91	RB1 Schaprode w.	2007-10-17 09:40:00	0.86	RB1 Schaprode w.	2005-12-07 09:06:00	2.9	3.4
WB5 Innenreede w.	2018-05-15 15:51:00	21.04	WB5 Innenreede w.	2018-07-03 15:55:00	0.81																									DB6 Barth oe.	2012-06-13 09:45:00	74.31	DB6 Barth oe.	2012-04-02 08:50:00	2.93	DB6 Barth oe.	2015-07-13 08:20:00	36.7	0.3	RB1 Schaprode w.	2007-11-19 13:55:00	22.32	RB1 Schaprode w.	2007-11-19 13:55:00	0.84	RB1 Schaprode w.	2006-04-19 08:45:00	3.9	3
WB5 Innenreede w.	2018-06-05 15:31:00	22.07	WB5 Innenreede w.	2018-09-04 15:46:00	2.14																									DB6 Barth oe.	2012-07-09 08:00:00	84.72	DB6 Barth oe.	2012-05-07 10:25:00	2.55	DB6 Barth oe.	2015-08-19 07:00:00	37.8	0.5	RB1 Schaprode w.	2008-01-21 14:00:00	61.65	RB1 Schaprode w.	2008-01-21 14:00:00	1.11	RB1 Schaprode w.	2006-05-10 08:36:00	4.4	2.9
WB5 Innenreede w.	2018-07-03 15:55:00	23.66	WB5 Innenreede w.	2018-11-13 15:19:00	1.02																									DB6 Barth oe.	2012-08-06 07:30:00	63.96	DB6 Barth oe.	2012-06-13 09:45:00	2.32	DB6 Barth oe.	2015-09-09 08:15:00	22.2	0.6	RB1 Schaprode w.	2008-02-19 08:15:00	53.65	RB1 Schaprode w.	2008-02-19 08:15:00	3.34	RB1 Schaprode w.	2006-06-15 12:15:00	5.9	2.2
WB5 Innenreede w.	2018-09-04 15:46:00	30.29																												DB6 Barth oe.	2012-09-18 09:45:00	75.86	DB6 Barth oe.	2012-07-09 08:00:00	1.91	DB6 Barth oe.	2015-10-05 08:45:00	21.5	0.6	RB1 Schaprode w.	2008-03-27 16:24:00	41.49	RB1 Schaprode w.	2008-03-27 16:24:00	1.16	RB1 Schaprode w.	2006-07-17 12:22:00	11.5	1.9
WB5 Innenreede w.	2018-11-13 15:19:00	18.86																												DB6 Barth oe.	2012-10-16 09:55:00	77.22	DB6 Barth oe.	2012-08-06 07:30:00	1.81	DB6 Barth oe.	2015-11-17 09:30:00	52.3	0.5	RB1 Schaprode w.	2008-04-14 13:10:00	36.85	RB1 Schaprode w.	2008-04-14 13:10:00	2.1	RB1 Schaprode w.	2006-08-09 12:30:00	10.3	1.6
																														DB6 Barth oe.	2012-11-06 09:30:00	58.63	DB6 Barth oe.	2012-09-18 09:45:00	2.09	DB6 Barth oe.	2015-12-07 08:25:00	100.5	0.3	RB1 Schaprode w.	2008-05-05 13:10:00	36.25	RB1 Schaprode w.	2008-05-05 13:10:00	0.91	RB1 Schaprode w.	2006-09-11 09:40:00	8.9	2.9
																														DB6 Barth oe.	2013-01-08 09:10:00	93.26	DB6 Barth oe.	2012-10-16 09:55:00	2.45	DB6 Barth oe.	2016-02-11 11:30:00	43.7	0.5	RB1 Schaprode w.	2008-06-04 11:27:00	65	RB1 Schaprode w.	2008-06-04 11:27:00	1.7	RB1 Schaprode w.	2006-10-05 08:05:00	11.2	2.7
																														DB6 Barth oe.	2013-04-17 09:45:00	171.86	DB6 Barth oe.	2012-11-06 09:30:00	1.86	DB6 Barth oe.	2016-03-02 09:00:00	39	0.5	RB1 Schaprode w.	2008-07-14 09:49:00	50.05	RB1 Schaprode w.	2008-07-14 09:49:00	0.98	RB1 Schaprode w.	2006-11-20 08:52:00	4.1	3.5
																														DB6 Barth oe.	2013-05-23 10:55:00	127.27	DB6 Barth oe.	2013-01-08 09:10:00	2.5	DB6 Barth oe.	2016-04-13 08:45:00	103.1	0.4	RB1 Schaprode w.	2008-08-06 08:15:00	53.6	RB1 Schaprode w.	2008-08-06 08:15:00	1.47	RB1 Schaprode w.	2006-12-04 08:45:00	6.3	2.7
																														DB6 Barth oe.	2013-06-10 11:00:00	104.18	DB6 Barth oe.	2013-04-17 09:45:00	3.15	DB6 Barth oe.	2016-05-09 09:00:00	43.6	0.3	RB1 Schaprode w.	2008-09-08 07:43:00	75.52	RB1 Schaprode w.	2008-09-08 07:43:00	1.62	RB1 Schaprode w.	2007-01-09 14:30:00	4.8	1.3
																														DB6 Barth oe.	2013-07-08 10:15:00	96.13	DB6 Barth oe.	2013-05-23 10:55:00	3.61	DB6 Barth oe.	2016-06-06 09:00:00	49.1	0.3	RB1 Schaprode w.	2008-10-07 08:18:00	48.22	RB1 Schaprode w.	2008-10-07 08:18:00	0.95	RB1 Schaprode w.	2007-01-29 09:15:00	5.2	6
																														DB6 Barth oe.	2013-08-22 08:15:00	71.5	DB6 Barth oe.	2013-06-10 11:00:00	3.16	DB6 Barth oe.	2016-07-04 08:40:00	43.6	0.4	RB1 Schaprode w.	2008-11-04 08:05:00	43.7	RB1 Schaprode w.	2008-11-04 08:05:00	2.96	RB1 Schaprode w.	2007-02-12 09:00:00	6	1
																														DB6 Barth oe.	2013-09-18 08:15:00	106.49	DB6 Barth oe.	2013-07-08 10:15:00	2.95	DB6 Barth oe.	2016-08-17 09:00:00	35.2	0.5	RB1 Schaprode w.	2008-11-24 13:55:00	37.19	RB1 Schaprode w.	2008-11-24 13:55:00	0.97	RB1 Schaprode w.	2007-03-12 08:15:00	6	2.9
																														DB6 Barth oe.	2013-10-07 10:00:00	106.91	DB6 Barth oe.	2013-08-22 08:15:00	1.99	DB6 Barth oe.	2016-09-06 13:40:00	45.6	0.4	RB1 Schaprode w.	2009-02-25 11:20:00	37.36	RB1 Schaprode w.	2009-02-25 11:20:00	1.17	RB1 Schaprode w.	2007-04-24 08:50:00	2	2.8
																														DB6 Barth oe.	2013-11-11 09:05:00	79.35	DB6 Barth oe.	2013-09-18 08:15:00	2.67	DB6 Barth oe.	2016-10-10 09:00:00	20.4	0.9	RB1 Schaprode w.	2009-03-18 10:37:00	39.08	RB1 Schaprode w.	2009-03-18 10:37:00	1.21	RB1 Schaprode w.	2007-05-14 09:21:00	5.3	2.6
																														DB6 Barth oe.	2013-12-09 09:00:00	87.98	DB6 Barth oe.	2013-10-07 10:00:00	2.45	DB6 Barth oe.	2016-11-07 08:50:00	21.3	0.9	RB1 Schaprode w.	2009-04-20 13:32:00	55.67	RB1 Schaprode w.	2009-04-20 13:32:00	0.86	RB1 Schaprode w.	2007-06-11 12:10:00	11.3	1.2
																														DB6 Barth oe.	2014-01-13 09:00:00	95.74	DB6 Barth oe.	2013-11-11 09:05:00	1.87	DB6 Barth oe.	2016-12-12 08:30:00	31.1	0.7	RB1 Schaprode w.	2009-05-11 12:52:00	48.97	RB1 Schaprode w.	2009-05-11 12:52:00	0.88	RB1 Schaprode w.	2007-07-11 07:52:00	9.3	1.7
																														DB6 Barth oe.	2014-02-18 09:20:00	179.43	DB6 Barth oe.	2013-12-09 09:00:00	2.36	DB6 Barth oe.	2017-03-06 08:20:00	24.2	0.8	RB1 Schaprode w.	2009-06-16 09:00:00	32.77	RB1 Schaprode w.	2009-06-16 09:00:00	1.11	RB1 Schaprode w.	2007-08-16 08:55:00	5.7	2.4
																														DB6 Barth oe.	2014-03-05 09:00:00	126.06	DB6 Barth oe.	2014-01-13 09:00:00	2.09	DB6 Barth oe.	2017-04-19 07:45:00	40.7	0.5	RB1 Schaprode w.	2009-07-07 14:23:00	36.77	RB1 Schaprode w.	2009-07-07 14:23:00	1.15	RB1 Schaprode w.	2007-09-13 08:58:00	2.3	2.8
																														DB6 Barth oe.	2014-04-02 09:15:00	88.16	DB6 Barth oe.	2014-02-18 09:20:00	3.06	DB6 Barth oe.	2017-05-08 08:40:00	77.1	0.3	RB1 Schaprode w.	2009-08-11 09:10:00	42.5	RB1 Schaprode w.	2009-08-11 09:10:00	1.35	RB1 Schaprode w.	2007-10-17 09:40:00	3.4	2.6
																														DB6 Barth oe.	2014-05-19 09:00:00	88.35	DB6 Barth oe.	2014-03-05 09:00:00	2.15	DB6 Barth oe.	2017-06-14 07:30:00	88.2	0.2	RB1 Schaprode w.	2009-09-22 13:40:00	39.87	RB1 Schaprode w.	2009-09-22 13:40:00	1.09	RB1 Schaprode w.	2007-11-19 13:55:00	1.9	2.9
																														DB6 Barth oe.	2014-06-12 11:00:00	115.79	DB6 Barth oe.	2014-04-02 09:15:00	2.16	DB6 Barth oe.	2017-07-10 08:20:00	37.1	0.4	RB1 Schaprode w.	2009-10-27 08:22:00	57.13	RB1 Schaprode w.	2009-10-27 08:22:00	0.7	RB1 Schaprode w.	2007-12-18 14:45:00	4.6	3
																														DB6 Barth oe.	2014-07-28 07:30:00	97.96	DB6 Barth oe.	2014-05-19 09:00:00	3.05	DB6 Barth oe.	2017-08-22 11:00:00	54.2	0.5	RB1 Schaprode w.	2009-12-01 08:50:00	67.77	RB1 Schaprode w.	2009-12-01 08:50:00	1.13	RB1 Schaprode w.	2008-01-21 14:00:00	9.1	1.5
																														DB6 Barth oe.	2014-08-05 07:00:00	105.89	DB6 Barth oe.	2014-06-12 11:00:00	3.35	DB6 Barth oe.	2017-09-18 12:15:00	29.7	0.4	RB1 Schaprode w.	2009-12-09 08:15:00	66.48	RB1 Schaprode w.	2009-12-09 08:15:00	1.01	RB1 Schaprode w.	2008-02-19 08:15:00	11	1.3
																														DB6 Barth oe.	2014-09-08 08:15:00	86.01	DB6 Barth oe.	2014-07-28 07:30:00	2.04	DB6 Barth oe.	2017-10-09 08:50:00	35.7	0.7	RB1 Schaprode w.	2010-03-29 07:43:00	46.84	RB1 Schaprode w.	2010-03-29 07:43:00	1.43	RB1 Schaprode w.	2008-03-27 16:24:00	5.2	2.2
																														DB6 Barth oe.	2014-10-06 08:45:00	91.02	DB6 Barth oe.	2014-08-05 07:00:00	2.37	DB6 Barth oe.	2017-11-13 08:20:00	84.5	0.4	RB1 Schaprode w.	2010-05-31 08:25:00	29.11	RB1 Schaprode w.	2010-05-31 08:25:00	0.77	RB1 Schaprode w.	2008-04-14 13:10:00	5.1	2.3
																														DB6 Barth oe.	2014-11-04 09:40:00	106.22	DB6 Barth oe.	2014-09-08 08:15:00	1.95	DB6 Barth oe.	2017-12-04 09:00:00	46.3	0.5	RB1 Schaprode w.	2010-06-29 07:41:00	15.3	RB1 Schaprode w.	2010-06-29 07:41:00	0.38	RB1 Schaprode w.	2008-05-05 13:10:00	6.8	1.7
																														DB6 Barth oe.	2014-12-08 08:58:00	151.91	DB6 Barth oe.	2014-10-06 08:45:00	2.01	DB6 Barth oe.	2018-01-10 08:50:00	51.3	0.5	RB1 Schaprode w.	2010-07-05 09:12:00	43.07	RB1 Schaprode w.	2010-07-05 09:12:00	1.31	RB1 Schaprode w.	2008-06-04 11:27:00	5.5	1
																														DB6 Barth oe.	2015-01-07 09:10:00	168.95	DB6 Barth oe.	2014-11-04 09:40:00	2.16	DB6 Barth oe.	2018-03-26 08:30:00	45.6	0.3	RB1 Schaprode w.	2010-08-30 10:52:00	46.74	RB1 Schaprode w.	2010-08-30 10:52:00	1.58	RB1 Schaprode w.	2008-07-14 09:49:00	18.4	1
																														DB6 Barth oe.	2015-02-18 09:15:00	257.67	DB6 Barth oe.	2014-12-08 08:58:00	2.68	DB6 Barth oe.	2018-04-16 08:40:00	81.4	0.4	RB1 Schaprode w.	2010-09-20 08:44:00	49.16	RB1 Schaprode w.	2010-09-20 08:44:00	1.78	RB1 Schaprode w.	2008-08-06 08:15:00	13.2	1.6
																														DB6 Barth oe.	2015-03-11 08:30:00	205.42	DB6 Barth oe.	2015-01-07 09:10:00	2.39	DB6 Barth oe.	2018-05-07 08:30:00	104.1	0.3	RB1 Schaprode w.	2010-10-27 08:09:00	32.302	RB1 Schaprode w.	2010-10-27 08:09:00	0.818	RB1 Schaprode w.	2008-09-08 07:43:00	6.8	2.6
																														DB6 Barth oe.	2015-04-08 08:30:00	157.68	DB6 Barth oe.	2015-02-18 09:15:00	2.33	DB6 Barth oe.	2018-06-06 09:00:00	74.7	0.3	RB1 Schaprode w.	2010-11-30 15:19:00	45	RB1 Schaprode w.	2010-11-30 15:19:00	1.422	RB1 Schaprode w.	2008-10-07 08:18:00	4.7	2.4
																														DB6 Barth oe.	2015-05-06 09:00:00	107.05	DB6 Barth oe.	2015-03-11 08:30:00	2.63	DB6 Barth oe.	2018-07-09 08:45:00	42.9	0.5	RB1 Schaprode w.	2011-03-31 14:25:00	61.337	RB1 Schaprode w.	2011-03-31 14:25:00	0.872	RB1 Schaprode w.	2008-11-04 08:05:00	4.9	1.8
																														DB6 Barth oe.	2015-06-08 09:00:00	135.57	DB6 Barth oe.	2015-04-08 08:30:00	2.73	DB6 Barth oe.	2018-08-21 08:20:00	92	0.4	RB1 Schaprode w.	2011-04-19 12:25:00	28.858	RB1 Schaprode w.	2011-04-19 12:25:00	0.748	RB1 Schaprode w.	2009-02-25 11:20:00	5.8	1.5
																														DB6 Barth oe.	2015-07-13 08:20:00	123.95	DB6 Barth oe.	2015-05-06 09:00:00	3.1	DB6 Barth oe.	2018-09-03 08:25:00	78.4	0.4	RB1 Schaprode w.	2011-05-24 12:00:00	44.181	RB1 Schaprode w.	2011-05-24 12:00:00	1.065	RB1 Schaprode w.	2009-03-18 10:37:00	3.7	2.5
																														DB6 Barth oe.	2015-08-19 07:00:00	83.32	DB6 Barth oe.	2015-06-08 09:00:00	3.87	DB6 Barth oe.	2018-10-11 09:45:00	77	0.4	RB1 Schaprode w.	2011-06-22 10:25:00	56.958	RB1 Schaprode w.	2011-06-22 10:25:00	1.675	RB1 Schaprode w.	2009-04-20 13:32:00	2.1	2.5
																														DB6 Barth oe.	2015-09-09 08:15:00	74.15	DB6 Barth oe.	2015-07-13 08:20:00	3.76	DB6 Barth oe.	2018-11-21 08:45:00	15.5	0.8	RB1 Schaprode w.	2011-07-27 10:50:00	45.141	RB1 Schaprode w.	2011-07-27 10:50:00	1.124	RB1 Schaprode w.	2009-05-11 12:52:00	3.3	2.2
																														DB6 Barth oe.	2015-10-05 08:45:00	81.22	DB6 Barth oe.	2015-08-19 07:00:00	2.15	DB6 Barth oe.	2018-12-05 11:00:00	33.3	0.6	RB1 Schaprode w.	2011-08-31 11:00:00	65.432	RB1 Schaprode w.	2011-08-31 11:00:00	1.99	RB1 Schaprode w.	2009-06-16 09:00:00	2.7	1.6
																														DB6 Barth oe.	2015-11-17 09:30:00	93.21	DB6 Barth oe.	2015-09-09 08:15:00	2.9	GS Gellenstrom Hiddensee w.	2007-02-12 10:12:00	0.5	3.5	RB1 Schaprode w.	2011-09-27 12:50:00	46.897	RB1 Schaprode w.	2011-09-27 12:50:00	1.096	RB1 Schaprode w.	2009-07-07 14:23:00	7.5	1.4
																														DB6 Barth oe.	2015-12-07 08:25:00	176.27	DB6 Barth oe.	2015-10-05 08:45:00	2.21	GS Gellenstrom Hiddensee w.	2007-03-12 09:30:00	4.2	5	RB1 Schaprode w.	2011-11-08 14:00:00	41.507	RB1 Schaprode w.	2011-11-08 14:00:00	1.266	RB1 Schaprode w.	2009-08-11 09:10:00	13.1	2
																														DB6 Barth oe.	2016-02-11 11:30:00	163.62	DB6 Barth oe.	2015-11-17 09:30:00	2.35	GS Gellenstrom Hiddensee w.	2007-04-24 10:05:00	2.1	1.8	RB1 Schaprode w.	2011-11-30 10:10:00	63.429	RB1 Schaprode w.	2011-11-30 10:10:00	1.796	RB1 Schaprode w.	2009-09-22 13:40:00	4.4	3.2
																														DB6 Barth oe.	2016-03-02 09:00:00	154.58	DB6 Barth oe.	2015-12-07 08:25:00	4.01	GS Gellenstrom Hiddensee w.	2007-05-02 09:47:00	0.7	4	RB1 Schaprode w.	2011-12-12 12:00:00	42.701	RB1 Schaprode w.	2011-12-12 12:00:00	2.511	RB1 Schaprode w.	2009-10-27 08:22:00	2.8	3.2
																														DB6 Barth oe.	2016-04-13 08:45:00	164.25	DB6 Barth oe.	2016-02-11 11:30:00	2.56	GS Gellenstrom Hiddensee w.	2007-07-04 10:30:00	9.4	1	RB1 Schaprode w.	2012-01-16 14:40:00	22.51	RB1 Schaprode w.	2012-01-16 14:40:00	1.02	RB1 Schaprode w.	2009-12-01 08:50:00	8.8	3
																														DB6 Barth oe.	2016-05-09 09:00:00	110.67	DB6 Barth oe.	2016-03-02 09:00:00	2.22	GS Gellenstrom Hiddensee w.	2007-09-20 09:15:00	3.4	1.9	RB1 Schaprode w.	2012-03-06 11:20:00	38.77	RB1 Schaprode w.	2012-03-06 11:20:00	1	RB1 Schaprode w.	2009-12-09 08:15:00	2.4	2.8
																														DB6 Barth oe.	2016-06-06 09:00:00	131.09	DB6 Barth oe.	2016-04-13 08:45:00	3.72	GS Gellenstrom Hiddensee w.	2007-11-19 09:30:00	0.9	4	RB1 Schaprode w.	2012-03-27 10:30:00	27.06	RB1 Schaprode w.	2012-03-27 10:30:00	0.82	RB1 Schaprode w.	2010-03-29 07:43:00	10.1	2.2
																														DB6 Barth oe.	2016-07-04 08:40:00	91.44	DB6 Barth oe.	2016-05-09 09:00:00	2.66	GS Gellenstrom Hiddensee w.	2007-12-17 10:05:00	1.1	5	RB1 Schaprode w.	2012-04-23 12:00:00	25.16	RB1 Schaprode w.	2012-04-23 12:00:00	0.64	RB1 Schaprode w.	2010-05-31 08:25:00	5.2	1.6
																														DB6 Barth oe.	2016-08-17 09:00:00	83.55	DB6 Barth oe.	2016-06-06 09:00:00	3.47	GS Gellenstrom Hiddensee w.	2008-02-13 11:29:00	0.8	4.5	RB1 Schaprode w.	2012-05-29 10:25:00	35.64	RB1 Schaprode w.	2012-05-29 10:25:00	1.37	RB1 Schaprode w.	2010-06-29 07:41:00	5.7	2.2
																														DB6 Barth oe.	2016-09-06 13:40:00	96.86	DB6 Barth oe.	2016-07-04 08:40:00	1.87	GS Gellenstrom Hiddensee w.	2008-04-24 15:19:00	0.5	4.5	RB1 Schaprode w.	2012-06-26 10:15:00	43.59	RB1 Schaprode w.	2012-06-26 10:15:00	2	RB1 Schaprode w.	2010-07-05 09:12:00	6.5	2.1
																														DB6 Barth oe.	2016-10-10 09:00:00	66.78	DB6 Barth oe.	2016-08-17 09:00:00	1.83	GS Gellenstrom Hiddensee w.	2008-05-19 09:19:00	1.7	3.5	RB1 Schaprode w.	2012-07-30 13:00:00	41.48	RB1 Schaprode w.	2012-07-30 13:00:00	1.43	RB1 Schaprode w.	2010-08-30 10:52:00	14.9	1.3
																														DB6 Barth oe.	2016-11-07 08:50:00	71.94	DB6 Barth oe.	2016-09-06 13:40:00	2.15	GS Gellenstrom Hiddensee w.	2008-07-07 09:50:00	6.7	1.4	RB1 Schaprode w.	2012-08-29 13:15:00	44.76	RB1 Schaprode w.	2012-08-29 13:15:00	1.32	RB1 Schaprode w.	2010-09-20 08:44:00	16	2.3
																														DB6 Barth oe.	2016-12-12 08:30:00	85.35	DB6 Barth oe.	2016-10-10 09:00:00	1.55	GS Gellenstrom Hiddensee w.	2008-08-25 09:35:00	1.9	3.5	RB1 Schaprode w.	2012-09-26 10:15:00	29.44	RB1 Schaprode w.	2012-09-26 10:15:00	0.88	RB1 Schaprode w.	2010-10-27 08:09:00	13.3	1.9
																														DB6 Barth oe.	2017-03-06 08:20:00	110.82	DB6 Barth oe.	2016-11-07 08:50:00	1.84	GS Gellenstrom Hiddensee w.	2008-10-06 10:05:00	2.6	1.6	RB1 Schaprode w.	2012-10-29 10:30:00	34.38	RB1 Schaprode w.	2012-10-29 10:30:00	1.25	RB1 Schaprode w.	2010-11-30 15:19:00	7.2	0.8
																														DB6 Barth oe.	2017-04-19 07:45:00	95.94	DB6 Barth oe.	2016-12-12 08:30:00	1.95	GS Gellenstrom Hiddensee w.	2008-11-04 09:59:00	1.8	3.5	RB1 Schaprode w.	2012-11-27 09:50:00	29.32	RB1 Schaprode w.	2012-11-27 09:50:00	0.82	RB1 Schaprode w.	2011-03-31 14:25:00	6.3	2.8
																														DB6 Barth oe.	2017-05-08 08:40:00	137.93	DB6 Barth oe.	2017-03-06 08:20:00	1.84	GS Gellenstrom Hiddensee w.	2009-01-22 15:30:00	1.6	3.5	RB1 Schaprode w.	2012-12-12 10:35:00	14.45	RB1 Schaprode w.	2012-12-12 10:35:00	0.68	RB1 Schaprode w.	2011-04-19 12:25:00	0.9	3.2
																														DB6 Barth oe.	2017-06-14 07:30:00	199.05	DB6 Barth oe.	2017-04-19 07:45:00	2.28	GS Gellenstrom Hiddensee w.	2009-02-09 09:44:00	3.5	6	RB1 Schaprode w.	2013-02-26 13:45:00	30.08	RB1 Schaprode w.	2013-02-26 13:45:00	0.82	RB1 Schaprode w.	2011-05-24 12:00:00	9	1
																														DB6 Barth oe.	2017-07-10 08:20:00	100.1	DB6 Barth oe.	2017-05-08 08:40:00	3.05	GS Gellenstrom Hiddensee w.	2009-03-09 09:53:00	7.1	7	RB1 Schaprode w.	2013-04-23 15:00:00	48.49	RB1 Schaprode w.	2013-04-23 15:00:00	1.18	RB1 Schaprode w.	2011-06-22 10:25:00	9.9	0.9
																														DB6 Barth oe.	2017-08-22 11:00:00	143.16	DB6 Barth oe.	2017-06-14 07:30:00	6.02	GS Gellenstrom Hiddensee w.	2009-04-20 10:05:00	0.6	5	RB1 Schaprode w.	2013-05-28 08:20:00	40.59	RB1 Schaprode w.	2013-05-28 08:20:00	1.01	RB1 Schaprode w.	2011-07-27 10:50:00	12.5	1.2
																														DB6 Barth oe.	2017-09-18 12:15:00	88.8	DB6 Barth oe.	2017-07-10 08:20:00	2.65	GS Gellenstrom Hiddensee w.	2009-05-25 10:28:00	0.8	6	RB1 Schaprode w.	2013-06-11 15:15:00	31.32	RB1 Schaprode w.	2013-06-11 15:15:00	0.93	RB1 Schaprode w.	2011-08-31 11:00:00	25.3	0.6
																														DB6 Barth oe.	2017-10-09 08:50:00	85.97	DB6 Barth oe.	2017-08-22 11:00:00	3.35	GS Gellenstrom Hiddensee w.	2009-06-18 09:59:00	1.1	4	RB1 Schaprode w.	2013-07-23 14:30:00	29.52	RB1 Schaprode w.	2013-07-23 14:30:00	0.82	RB1 Schaprode w.	2011-09-27 12:50:00	7.7	1.1
																														DB6 Barth oe.	2017-11-13 08:20:00	142.3	DB6 Barth oe.	2017-09-18 12:15:00	1.98	GS Gellenstrom Hiddensee w.	2009-07-01 10:27:00	2.8	4	RB1 Schaprode w.	2013-08-20 14:40:00	49.11	RB1 Schaprode w.	2013-08-20 14:40:00	1.61	RB1 Schaprode w.	2011-11-08 14:00:00	11.7	1.3
																														DB6 Barth oe.	2017-12-04 09:00:00	149.58	DB6 Barth oe.	2017-10-09 08:50:00	1.86	GS Gellenstrom Hiddensee w.	2009-08-24 11:25:00	2.4	5	RB1 Schaprode w.	2013-09-24 15:45:00	43.4	RB1 Schaprode w.	2013-09-24 15:45:00	1.01	RB1 Schaprode w.	2011-11-30 10:10:00	27.6	1.5
																														DB6 Barth oe.	2018-01-10 08:50:00	240.46	DB6 Barth oe.	2017-11-13 08:20:00	2.73	GS Gellenstrom Hiddensee w.	2009-09-21 10:13:00	4.9	4.5	RB1 Schaprode w.	2013-10-22 16:00:00	30.19	RB1 Schaprode w.	2013-10-22 16:00:00	0.63	RB1 Schaprode w.	2011-12-12 12:00:00	15.8	0.8
																														DB6 Barth oe.	2018-03-26 08:30:00	342.22	DB6 Barth oe.	2017-12-04 09:00:00	2.01	GS Gellenstrom Hiddensee w.	2009-10-19 10:07:00	1.8	2.5	RB1 Schaprode w.	2013-11-19 15:45:00	32.97	RB1 Schaprode w.	2013-11-19 15:45:00	0.78	RB1 Schaprode w.	2012-01-16 14:40:00	1.6	2
																														DB6 Barth oe.	2018-04-16 08:40:00	339.39	DB6 Barth oe.	2018-01-10 08:50:00	2.83	GS Gellenstrom Hiddensee w.	2009-11-23 09:47:00	2.4	4	RB1 Schaprode w.	2013-12-10 15:00:00	30.66	RB1 Schaprode w.	2013-12-10 15:00:00	0.75	RB1 Schaprode w.	2012-03-06 11:20:00	4.8	2
																														DB6 Barth oe.	2018-05-07 08:30:00	190.69	DB6 Barth oe.	2018-03-26 08:30:00	3.21	GS Gellenstrom Hiddensee w.	2009-11-30 09:45:00	4.2	5	RB1 Schaprode w.	2014-03-25 15:00:00	29.56	RB1 Schaprode w.	2014-03-25 15:00:00	0.62	RB1 Schaprode w.	2012-03-27 10:30:00	5.5	4
																														DB6 Barth oe.	2018-06-06 09:00:00	144.91	DB6 Barth oe.	2018-04-16 08:40:00	2.92	GS Gellenstrom Hiddensee w.	2010-04-06 09:42:22	2.9	3.5	RB1 Schaprode w.	2014-05-20 16:50:00	37.74	RB1 Schaprode w.	2014-05-20 16:50:00	0.6	RB1 Schaprode w.	2012-04-23 12:00:00	3.8	2.8
																														DB6 Barth oe.	2018-07-09 08:45:00	56.21	DB6 Barth oe.	2018-05-07 08:30:00	2.43	GS Gellenstrom Hiddensee w.	2010-06-29 13:43:00	1.4	1.6	RB1 Schaprode w.	2014-06-10 16:10:00	44.9	RB1 Schaprode w.	2014-06-10 16:10:00	1.42	RB1 Schaprode w.	2012-05-29 10:25:00	5.2	1.4
																														DB6 Barth oe.	2018-08-21 08:20:00	156.03	DB6 Barth oe.	2018-06-06 09:00:00	3.22	GS Gellenstrom Hiddensee w.	2010-08-09 10:10:00	6.5	1.8	RB1 Schaprode w.	2014-07-29 16:30:00	66.46	RB1 Schaprode w.	2014-07-29 16:30:00	2.29	RB1 Schaprode w.	2012-06-26 10:15:00	12.5	0.8
																														DB6 Barth oe.	2018-09-03 08:25:00	123.31	DB6 Barth oe.	2018-07-09 08:45:00	1.22	GS Gellenstrom Hiddensee w.	2010-11-29 09:32:20	2.1	1.8	RB1 Schaprode w.	2014-08-27 15:00:00	48.23	RB1 Schaprode w.	2014-08-27 15:00:00	1.19	RB1 Schaprode w.	2012-07-30 13:00:00	11	1.7
																														DB6 Barth oe.	2018-10-11 09:45:00	103.12	DB6 Barth oe.	2018-08-21 08:20:00	3.09	GS Gellenstrom Hiddensee w.	2011-03-16 09:41:24	5.8	2	RB1 Schaprode w.	2014-09-24 16:15:00	34.29	RB1 Schaprode w.	2014-09-24 16:15:00	1.04	RB1 Schaprode w.	2012-08-29 13:15:00	8.1	1.9
																														DB6 Barth oe.	2018-11-21 08:45:00	103.23	DB6 Barth oe.	2018-09-03 08:25:00	5.99	GS Gellenstrom Hiddensee w.	2011-04-18 10:58:17	1.6	4.5	RB1 Schaprode w.	2014-10-15 16:30:00	37.51	RB1 Schaprode w.	2014-10-15 16:30:00	0.76	RB1 Schaprode w.	2012-09-26 10:15:00	3.3	3.5
																														DB6 Barth oe.	2018-12-05 11:00:00	129.95	DB6 Barth oe.	2018-10-11 09:45:00	2.44	GS Gellenstrom Hiddensee w.	2011-05-16 11:10:44	1.7	1.8	RB1 Schaprode w.	2014-11-25 16:00:00	44.72	RB1 Schaprode w.	2014-11-25 16:00:00	1.25	RB1 Schaprode w.	2012-10-29 10:30:00	3.8	2.5
																														GS Gellenstrom Hiddensee w.	2007-02-12 10:12:00	21.32	DB6 Barth oe.	2018-11-21 08:45:00	1.57	GS Gellenstrom Hiddensee w.	2011-07-05 09:38:33	2.1	4	RB1 Schaprode w.	2014-12-17 10:40:00	53.4	RB1 Schaprode w.	2014-12-17 10:40:00	1.74	RB1 Schaprode w.	2012-11-27 09:50:00	8.3	2.7
																														GS Gellenstrom Hiddensee w.	2007-03-12 09:30:00	18.74	DB6 Barth oe.	2018-12-05 11:00:00	2.21	GS Gellenstrom Hiddensee w.	2011-08-01 09:55:23	3.5	3.5	RB1 Schaprode w.	2015-01-13 15:45:00	68.03	RB1 Schaprode w.	2015-01-13 15:45:00	1.85	RB1 Schaprode w.	2012-12-12 10:35:00	1.8	2.5
																														GS Gellenstrom Hiddensee w.	2007-04-24 10:05:00	20.87	GS Gellenstrom Hiddensee w.	2007-02-12 10:12:00	1.56	GS Gellenstrom Hiddensee w.	2011-09-05 09:26:49	11.1	1.4	RB1 Schaprode w.	2015-02-26 15:10:00	83.81	RB1 Schaprode w.	2015-02-26 15:10:00	0.94	RB1 Schaprode w.	2013-02-26 13:45:00	3.1	1.9
																														GS Gellenstrom Hiddensee w.	2007-05-02 09:47:00	15.43	GS Gellenstrom Hiddensee w.	2007-03-12 09:30:00	1.14	GS Gellenstrom Hiddensee w.	2011-10-04 09:59:04	2.7	2.5	RB1 Schaprode w.	2015-03-16 14:55:00	72.44	RB1 Schaprode w.	2015-03-16 14:55:00	1.17	RB1 Schaprode w.	2013-04-23 15:00:00	6.1	2.4
																														GS Gellenstrom Hiddensee w.	2007-07-04 10:30:00	27.98	GS Gellenstrom Hiddensee w.	2007-04-24 10:05:00	0.75	GS Gellenstrom Hiddensee w.	2011-11-14 09:56:14	15	1.5	RB1 Schaprode w.	2015-04-27 12:45:00	27.86	RB1 Schaprode w.	2015-04-27 12:45:00	0.67	RB1 Schaprode w.	2013-05-28 08:20:00	5.1	2
																														GS Gellenstrom Hiddensee w.	2007-09-20 09:15:00	19.02	GS Gellenstrom Hiddensee w.	2007-05-02 09:47:00	0.73	GS Gellenstrom Hiddensee w.	2012-01-02 10:20:00	5	1.6	RB1 Schaprode w.	2015-05-18 13:30:00	33.48	RB1 Schaprode w.	2015-05-18 13:30:00	0.76	RB1 Schaprode w.	2013-06-11 15:15:00	3.6	2.5
																														GS Gellenstrom Hiddensee w.	2007-11-19 09:30:00	20.52	GS Gellenstrom Hiddensee w.	2007-07-04 10:30:00	2.44	GS Gellenstrom Hiddensee w.	2012-01-30 09:47:00	0.7	3	RB1 Schaprode w.	2015-06-15 12:20:00	38.76	RB1 Schaprode w.	2015-06-15 12:20:00	1.39	RB1 Schaprode w.	2013-07-23 14:30:00	7.3	3
																														GS Gellenstrom Hiddensee w.	2008-02-13 11:29:00	22.24	GS Gellenstrom Hiddensee w.	2007-09-20 09:15:00	1.11	GS Gellenstrom Hiddensee w.	2012-03-14 09:34:00	1.1	4.5	RB1 Schaprode w.	2015-07-13 12:00:00	33.17	RB1 Schaprode w.	2015-07-13 12:00:00	1.03	RB1 Schaprode w.	2013-08-20 14:40:00	12.2	1.3
																														GS Gellenstrom Hiddensee w.	2008-04-24 15:19:00	17.97	GS Gellenstrom Hiddensee w.	2007-11-19 09:30:00	1.22	GS Gellenstrom Hiddensee w.	2012-04-10 10:23:00	1	4.5	RB1 Schaprode w.	2015-08-24 12:05:00	43.21	RB1 Schaprode w.	2015-08-24 12:05:00	1.04	RB1 Schaprode w.	2013-09-24 15:45:00	8.2	1.8
																														GS Gellenstrom Hiddensee w.	2008-05-19 09:19:00	20.91	GS Gellenstrom Hiddensee w.	2008-02-13 11:29:00	1.15	GS Gellenstrom Hiddensee w.	2012-05-31 13:28:00	1.6	3.5	RB1 Schaprode w.	2015-09-07 12:05:00	36.48	RB1 Schaprode w.	2015-09-07 12:05:00	1.04	RB1 Schaprode w.	2013-10-22 16:00:00	5.3	3.2
																														GS Gellenstrom Hiddensee w.	2008-07-07 09:50:00	23.75	GS Gellenstrom Hiddensee w.	2008-04-24 15:19:00	0.79	GS Gellenstrom Hiddensee w.	2012-06-18 09:41:00	1.7	2.5	RB1 Schaprode w.	2015-10-12 11:20:00	37.9	RB1 Schaprode w.	2015-10-12 11:20:00	0.99	RB1 Schaprode w.	2013-11-19 15:45:00	8.9	1.8
																														GS Gellenstrom Hiddensee w.	2008-08-25 09:35:00	25.21	GS Gellenstrom Hiddensee w.	2008-05-19 09:19:00	0.88	GS Gellenstrom Hiddensee w.	2012-07-09 09:30:00	2.7	2.5	RB1 Schaprode w.	2015-11-16 12:10:00	36.78	RB1 Schaprode w.	2015-11-16 12:10:00	0.97	RB1 Schaprode w.	2013-12-10 15:00:00	5.3	1.3
																														GS Gellenstrom Hiddensee w.	2008-10-06 10:05:00	20.76	GS Gellenstrom Hiddensee w.	2008-07-07 09:50:00	1.11	GS Gellenstrom Hiddensee w.	2012-08-06 10:10:00	3.7	1.6	RB1 Schaprode w.	2015-12-07 11:05:00	37.67	RB1 Schaprode w.	2015-12-07 11:05:00	0.87	RB1 Schaprode w.	2014-03-25 15:00:00	4.1	3
																														GS Gellenstrom Hiddensee w.	2008-11-04 09:59:00	19.95	GS Gellenstrom Hiddensee w.	2008-08-25 09:35:00	1.31	GS Gellenstrom Hiddensee w.	2012-09-10 10:30:49	2	4	RB1 Schaprode w.	2016-02-22 10:10:00	69.51	RB1 Schaprode w.	2016-02-22 10:10:00	1.23	RB1 Schaprode w.	2014-05-20 16:50:00	3	2.7
																														GS Gellenstrom Hiddensee w.	2009-01-22 15:30:00	26.91	GS Gellenstrom Hiddensee w.	2008-10-06 10:05:00	0.83	GS Gellenstrom Hiddensee w.	2012-10-01 09:36:00	1.5	3.5	RB1 Schaprode w.	2016-03-21 12:05:00	33.38	RB1 Schaprode w.	2016-03-21 12:05:00	0.81	RB1 Schaprode w.	2014-06-10 16:10:00	9.1	1.2
																														GS Gellenstrom Hiddensee w.	2009-02-09 09:44:00	24.45	GS Gellenstrom Hiddensee w.	2008-11-04 09:59:00	0.94	GS Gellenstrom Hiddensee w.	2012-11-12 10:06:00	1.1	3	RB1 Schaprode w.	2016-04-18 12:05:00	55.83	RB1 Schaprode w.	2016-04-18 12:05:00	1.42	RB1 Schaprode w.	2014-07-29 16:30:00	25.5	1
																														GS Gellenstrom Hiddensee w.	2009-03-09 09:53:00	36.68	GS Gellenstrom Hiddensee w.	2009-01-22 15:30:00	1.22	GS Gellenstrom Hiddensee w.	2013-02-25 11:33:00	0.9	3.5	RB1 Schaprode w.	2016-05-17 10:45:00	27.63	RB1 Schaprode w.	2016-05-17 10:45:00	0.63	RB1 Schaprode w.	2014-08-27 15:00:00	11.3	1.9
																														GS Gellenstrom Hiddensee w.	2009-04-20 10:05:00	21.09	GS Gellenstrom Hiddensee w.	2009-02-09 09:44:00	1.32	GS Gellenstrom Hiddensee w.	2013-04-15 09:57:00	9.4	2	RB1 Schaprode w.	2016-06-20 12:35:00	51.96	RB1 Schaprode w.	2016-06-20 12:35:00	1.09	RB1 Schaprode w.	2014-09-24 16:15:00	8.2	1.5
																														GS Gellenstrom Hiddensee w.	2009-05-25 10:28:00	18.58	GS Gellenstrom Hiddensee w.	2009-03-09 09:53:00	1.27	GS Gellenstrom Hiddensee w.	2013-05-06 09:39:00	1.6	4	RB1 Schaprode w.	2016-07-18 08:40:00	38.25	RB1 Schaprode w.	2016-07-18 08:40:00	1.3	RB1 Schaprode w.	2014-10-15 16:30:00	6.6	3.2
																														GS Gellenstrom Hiddensee w.	2009-06-18 09:59:00	21.57	GS Gellenstrom Hiddensee w.	2009-04-20 10:05:00	0.75	GS Gellenstrom Hiddensee w.	2013-06-03 09:49:00	2.1	0.8	RB1 Schaprode w.	2016-08-15 09:50:00	43.05	RB1 Schaprode w.	2016-08-15 09:50:00	1.53	RB1 Schaprode w.	2014-11-25 16:00:00	12.1	2
																														GS Gellenstrom Hiddensee w.	2009-07-01 10:27:00	20.1	GS Gellenstrom Hiddensee w.	2009-05-25 10:28:00	0.64	GS Gellenstrom Hiddensee w.	2013-07-15 09:40:00	4.4	1.8	RB1 Schaprode w.	2016-09-26 11:50:00	49.12	RB1 Schaprode w.	2016-09-26 11:50:00	1.41	RB1 Schaprode w.	2014-12-17 10:40:00	14	0.6
																														GS Gellenstrom Hiddensee w.	2009-08-24 11:25:00	22.39	GS Gellenstrom Hiddensee w.	2009-06-18 09:59:00	0.62	GS Gellenstrom Hiddensee w.	2013-08-26 09:36:00	1.1	3.5	RB1 Schaprode w.	2016-10-24 11:30:00	43.26	RB1 Schaprode w.	2016-10-24 11:30:00	1.43	RB1 Schaprode w.	2015-01-13 15:45:00	13.6	0.7
																														GS Gellenstrom Hiddensee w.	2009-09-21 10:13:00	22.78	GS Gellenstrom Hiddensee w.	2009-07-01 10:27:00	0.86	GS Gellenstrom Hiddensee w.	2013-09-24 09:13:00	2.9	3	RB1 Schaprode w.	2016-11-21 13:20:00	34.02	RB1 Schaprode w.	2016-11-21 13:20:00	0.65	RB1 Schaprode w.	2015-02-26 15:10:00	9.1	2.1
																														GS Gellenstrom Hiddensee w.	2009-10-19 10:07:00	22.02	GS Gellenstrom Hiddensee w.	2009-08-24 11:25:00	1.04	GS Gellenstrom Hiddensee w.	2013-10-23 10:37:00	5.9	2.5	RB1 Schaprode w.	2016-12-12 12:40:00	32.23	RB1 Schaprode w.	2016-12-12 12:40:00	0.92	RB1 Schaprode w.	2015-03-16 14:55:00	3	2.3
																														GS Gellenstrom Hiddensee w.	2009-11-23 09:47:00	20.73	GS Gellenstrom Hiddensee w.	2009-09-21 10:13:00	1.27	GS Gellenstrom Hiddensee w.	2013-12-12 11:01:00	2.6	2	RB1 Schaprode w.	2017-01-23 12:05:00	51.23	RB1 Schaprode w.	2017-01-23 12:05:00	1.35	RB1 Schaprode w.	2015-04-27 12:45:00	2.1	4
																														GS Gellenstrom Hiddensee w.	2009-11-30 09:45:00	29.23	GS Gellenstrom Hiddensee w.	2009-10-19 10:07:00	0.93	GS Gellenstrom Hiddensee w.	2014-05-26 10:13:00	2.2	2.5	RB1 Schaprode w.	2017-02-27 13:00:00	60	RB1 Schaprode w.	2017-02-27 13:00:00	1.22	RB1 Schaprode w.	2015-05-18 13:30:00	1.7	2
																														GS Gellenstrom Hiddensee w.	2010-04-06 09:42:22	19.3	GS Gellenstrom Hiddensee w.	2009-11-23 09:47:00	1.08	GS Gellenstrom Hiddensee w.	2014-06-10 09:42:00	3.3	2	RB1 Schaprode w.	2017-03-20 11:20:00	344.84	RB1 Schaprode w.	2017-03-20 11:20:00	8.59	RB1 Schaprode w.	2015-06-15 12:20:00	6.9	1.7
																														GS Gellenstrom Hiddensee w.	2010-06-29 13:43:00	20.26	GS Gellenstrom Hiddensee w.	2009-11-30 09:45:00	1.2	GS Gellenstrom Hiddensee w.	2014-07-07 09:40:00	2	2.5	RB1 Schaprode w.	2017-04-24 10:45:00	43.02	RB1 Schaprode w.	2017-04-24 10:45:00	1.45	RB1 Schaprode w.	2015-07-13 12:00:00	5.5	1.9
																														GS Gellenstrom Hiddensee w.	2010-08-09 10:10:00	27.36	GS Gellenstrom Hiddensee w.	2010-04-06 09:42:22	0.63	GS Gellenstrom Hiddensee w.	2014-08-04 10:11:00	4.9	2	RB1 Schaprode w.	2017-05-22 08:30:00	35.36	RB1 Schaprode w.	2017-05-22 08:30:00	0.79	RB1 Schaprode w.	2015-08-24 12:05:00	3.1	1.7
																														GS Gellenstrom Hiddensee w.	2010-11-29 09:32:20	20.9	GS Gellenstrom Hiddensee w.	2010-06-29 13:43:00	0.62	GS Gellenstrom Hiddensee w.	2014-09-23 11:47:00	3.7	2.5	RB1 Schaprode w.	2017-06-26 11:10:00	60.01	RB1 Schaprode w.	2017-06-26 11:10:00	2.61	RB1 Schaprode w.	2015-09-07 12:05:00	1.6	2.1
																														GS Gellenstrom Hiddensee w.	2011-03-16 09:41:24	23.692	GS Gellenstrom Hiddensee w.	2010-08-09 10:10:00	0.89	GS Gellenstrom Hiddensee w.	2014-11-13 13:52:00	0.6	5	RB1 Schaprode w.	2017-07-24 08:50:00	45.93	RB1 Schaprode w.	2017-07-24 08:50:00	1.74	RB1 Schaprode w.	2015-10-12 11:20:00	1.4	2.4
																														GS Gellenstrom Hiddensee w.	2011-04-18 10:58:17	19.493	GS Gellenstrom Hiddensee w.	2010-11-29 09:32:20	0.744	GS Gellenstrom Hiddensee w.	2014-12-02 09:56:00	0.8	4	RB1 Schaprode w.	2017-08-28 11:25:00	41.06	RB1 Schaprode w.	2017-08-28 11:25:00	1.31	RB1 Schaprode w.	2015-11-16 12:10:00	4.6	2.3
																														GS Gellenstrom Hiddensee w.	2011-05-16 11:10:44	22.793	GS Gellenstrom Hiddensee w.	2011-03-16 09:41:24	0.997	GS Gellenstrom Hiddensee w.	2015-02-09 09:58:00	2.1	2.1	RB1 Schaprode w.	2017-09-25 09:35:00	35.62	RB1 Schaprode w.	2017-09-25 09:35:00	0.72	RB1 Schaprode w.	2015-12-07 11:05:00	3.6	1.8
																														GS Gellenstrom Hiddensee w.	2011-07-05 09:38:33	17.525	GS Gellenstrom Hiddensee w.	2011-04-18 10:58:17	0.411	GS Gellenstrom Hiddensee w.	2015-03-25 13:12:00	4.2	2.9	RB1 Schaprode w.	2017-10-23 10:15:00	42.74	RB1 Schaprode w.	2017-10-23 10:15:00	1.4	RB1 Schaprode w.	2016-02-22 10:10:00	11.6	0.8
																														GS Gellenstrom Hiddensee w.	2011-08-01 09:55:23	23.674	GS Gellenstrom Hiddensee w.	2011-05-16 11:10:44	0.3362	GS Gellenstrom Hiddensee w.	2015-05-26 09:50:00	0.5	4.5	RB1 Schaprode w.	2017-11-27 08:20:00	54.54	RB1 Schaprode w.	2017-11-27 08:20:00	1.87	RB1 Schaprode w.	2016-03-21 12:05:00	4.3	2.6
																														GS Gellenstrom Hiddensee w.	2011-09-05 09:26:49	35.678	GS Gellenstrom Hiddensee w.	2011-07-05 09:38:33	0.466	GS Gellenstrom Hiddensee w.	2015-06-22 09:37:00	0.7	3.8	RB1 Schaprode w.	2017-12-11 09:40:00	44.78	RB1 Schaprode w.	2017-12-11 09:40:00	0.8	RB1 Schaprode w.	2016-04-18 12:05:00	6.2	2.1
																														GS Gellenstrom Hiddensee w.	2011-10-04 09:59:04	22.119	GS Gellenstrom Hiddensee w.	2011-08-01 09:55:23	0.66	GS Gellenstrom Hiddensee w.	2015-07-20 09:54:00	2.4	2.2	RB1 Schaprode w.	2018-01-29 09:50:00	150.9	RB1 Schaprode w.	2018-01-29 09:50:00	2.38	RB1 Schaprode w.	2016-05-17 10:45:00	1.7	2.5
																														GS Gellenstrom Hiddensee w.	2011-11-14 09:56:14	39.751	GS Gellenstrom Hiddensee w.	2011-09-05 09:26:49	1.319	GS Gellenstrom Hiddensee w.	2015-08-10 09:49:00	1.9	3	RB1 Schaprode w.	2018-02-26 10:05:00	83.11	RB1 Schaprode w.	2018-02-26 10:05:00	1.15	RB1 Schaprode w.	2016-06-20 12:35:00	2.4	1.8
																														GS Gellenstrom Hiddensee w.	2012-01-02 10:20:00	29.47	GS Gellenstrom Hiddensee w.	2011-10-04 09:59:04	0.729	GS Gellenstrom Hiddensee w.	2015-09-23 10:17:00	1.2	4.5	RB1 Schaprode w.	2018-03-27 09:20:00	196.47	RB1 Schaprode w.	2018-03-27 09:20:00	1.17	RB1 Schaprode w.	2016-07-18 08:40:00	3	2
																														GS Gellenstrom Hiddensee w.	2012-01-30 09:47:00	19.57	GS Gellenstrom Hiddensee w.	2011-11-14 09:56:14	1.288	GS Gellenstrom Hiddensee w.	2015-10-26 14:50:00	2.9	3.5	RB1 Schaprode w.	2018-04-24 09:40:00	60.19	RB1 Schaprode w.	2018-04-24 09:40:00	1.45	RB1 Schaprode w.	2016-08-15 09:50:00	3.5	2.8
																														GS Gellenstrom Hiddensee w.	2012-03-14 09:34:00	18.85	GS Gellenstrom Hiddensee w.	2012-01-02 10:20:00	1.02	GS Gellenstrom Hiddensee w.	2015-11-26 10:26:00	2.5	5.5	RB1 Schaprode w.	2018-05-28 11:30:00	69.71	RB1 Schaprode w.	2018-05-28 11:30:00	2.36	RB1 Schaprode w.	2016-09-26 11:50:00	3.3	4.8
																														GS Gellenstrom Hiddensee w.	2012-04-10 10:23:00	14.95	GS Gellenstrom Hiddensee w.	2012-01-30 09:47:00	1.1	GS Gellenstrom Hiddensee w.	2015-12-07 09:48:00	2.1	2	RB1 Schaprode w.	2018-06-25 14:15:00	38.84	RB1 Schaprode w.	2018-06-25 14:15:00	1.13	RB1 Schaprode w.	2016-10-24 11:30:00	0.9	3.4
																														GS Gellenstrom Hiddensee w.	2012-05-31 13:28:00	18.48	GS Gellenstrom Hiddensee w.	2012-03-14 09:34:00	0.93	GS Gellenstrom Hiddensee w.	2016-03-14 09:39:00	2.1	3.5	RB1 Schaprode w.	2018-07-23 11:45:00	45.57	RB1 Schaprode w.	2018-07-23 11:45:00	1.41	RB1 Schaprode w.	2016-11-21 13:20:00	1.3	2.9
																														GS Gellenstrom Hiddensee w.	2012-06-18 09:41:00	14.89	GS Gellenstrom Hiddensee w.	2012-04-10 10:23:00	0.61	GS Gellenstrom Hiddensee w.	2016-04-11 10:11:00	0.4	4	RB1 Schaprode w.	2018-08-27 12:10:00	48.72	RB1 Schaprode w.	2018-08-27 12:10:00	1.08	RB1 Schaprode w.	2016-12-12 12:40:00	5.4	2.8
																														GS Gellenstrom Hiddensee w.	2012-07-09 09:30:00	19.95	GS Gellenstrom Hiddensee w.	2012-05-31 13:28:00	1.03	GS Gellenstrom Hiddensee w.	2016-05-18 10:56:00	1.8	3	RB1 Schaprode w.	2018-10-22 12:15:00	32.08	RB1 Schaprode w.	2018-10-22 12:15:00	0.87	RB1 Schaprode w.	2017-01-23 12:05:00	2	2
																														GS Gellenstrom Hiddensee w.	2012-08-06 10:10:00	23.95	GS Gellenstrom Hiddensee w.	2012-06-18 09:41:00	0.78	GS Gellenstrom Hiddensee w.	2016-06-13 09:39:00	1.1	4	RB1 Schaprode w.	2018-11-19 11:30:00	40.53	RB1 Schaprode w.	2018-11-19 11:30:00	1.77	RB1 Schaprode w.	2017-02-27 13:00:00	6.2	1
																														GS Gellenstrom Hiddensee w.	2012-09-10 10:30:49	20.64	GS Gellenstrom Hiddensee w.	2012-07-09 09:30:00	1.08	GS Gellenstrom Hiddensee w.	2016-07-25 09:41:00	1.6	5	RB1 Schaprode w.	2018-12-04 09:20:00	42.5	RB1 Schaprode w.	2018-12-04 09:20:00	1.13	RB1 Schaprode w.	2017-03-20 11:20:00	9.3	2.9
																														GS Gellenstrom Hiddensee w.	2012-10-01 09:36:00	22.88	GS Gellenstrom Hiddensee w.	2012-08-06 10:10:00	1.67	GS Gellenstrom Hiddensee w.	2016-08-16 09:38:00	1.1	3.5	RB2 Vitte oe.	1990-04-26 08:43:00	32.2	RB2 Vitte oe.	1990-04-26 08:43:00	1.74	RB1 Schaprode w.	2017-04-24 10:45:00	12.8	2.3
																														GS Gellenstrom Hiddensee w.	2012-11-12 10:06:00	19.3	GS Gellenstrom Hiddensee w.	2012-09-10 10:30:49	1.2	GS Gellenstrom Hiddensee w.	2016-10-10 09:43:00	2.5	2.5	RB2 Vitte oe.	1990-04-26 08:43:00	36.2	RB2 Vitte oe.	1990-04-26 08:43:00	1.74	RB1 Schaprode w.	2017-05-22 08:30:00	4	3.6
																														GS Gellenstrom Hiddensee w.	2013-02-25 11:33:00	22.1	GS Gellenstrom Hiddensee w.	2012-10-01 09:36:00	1.18	GS Gellenstrom Hiddensee w.	2016-12-05 10:06:00	2.7	2.5	RB2 Vitte oe.	1990-05-17 07:14:00	50.3	RB2 Vitte oe.	1990-05-17 07:14:00	2.26	RB1 Schaprode w.	2017-06-26 11:10:00	24.7	1.1
																														GS Gellenstrom Hiddensee w.	2013-04-15 09:57:00	36.19	GS Gellenstrom Hiddensee w.	2012-11-12 10:06:00	1.45	GS Gellenstrom Hiddensee w.	2017-03-27 09:32:00	1.7	4	RB2 Vitte oe.	1990-05-17 07:14:00	41.2	RB2 Vitte oe.	1990-05-17 07:14:00	1.84	RB1 Schaprode w.	2017-07-24 08:50:00	8.6	1.2
																														GS Gellenstrom Hiddensee w.	2013-05-06 09:39:00	19.94	GS Gellenstrom Hiddensee w.	2013-02-25 11:33:00	1.08	GS Gellenstrom Hiddensee w.	2017-04-18 09:38:00	2.2	4.5	RB2 Vitte oe.	1990-06-11 15:09:00	96.8	RB2 Vitte oe.	1990-07-09 08:32:00	3.28	RB1 Schaprode w.	2017-08-28 11:25:00	2.1	2.4
																														GS Gellenstrom Hiddensee w.	2013-06-03 09:49:00	13.36	GS Gellenstrom Hiddensee w.	2013-04-15 09:57:00	1.25	GS Gellenstrom Hiddensee w.	2017-05-15 09:30:00	0.4	4.5	RB2 Vitte oe.	1990-06-11 15:09:00	44	RB2 Vitte oe.	1990-07-09 08:32:00	2.04	RB1 Schaprode w.	2017-09-25 09:35:00	1.7	3.1
																														GS Gellenstrom Hiddensee w.	2013-07-15 09:40:00	21.81	GS Gellenstrom Hiddensee w.	2013-05-06 09:39:00	0.49	GS Gellenstrom Hiddensee w.	2017-06-12 09:54:00	1.1	5	RB2 Vitte oe.	1990-07-09 08:32:00	57	RB2 Vitte oe.	1990-08-06 14:53:00	2.99	RB1 Schaprode w.	2017-10-23 10:15:00	3.7	2.4
																														GS Gellenstrom Hiddensee w.	2013-08-26 09:36:00	14.47	GS Gellenstrom Hiddensee w.	2013-06-03 09:49:00	0.67	GS Gellenstrom Hiddensee w.	2017-07-27 15:19:00	4.7	1.9	RB2 Vitte oe.	1990-08-06 14:53:00	106.7	RB2 Vitte oe.	1990-08-06 14:53:00	2.57	RB1 Schaprode w.	2017-11-27 08:20:00	5.9	1.9
																														GS Gellenstrom Hiddensee w.	2013-09-24 09:13:00	21.4	GS Gellenstrom Hiddensee w.	2013-07-15 09:40:00	1.01	GS Gellenstrom Hiddensee w.	2017-08-14 09:49:00	1.4	3.5	RB2 Vitte oe.	1990-08-06 14:53:00	49.6	RB2 Vitte oe.	1990-09-03 09:16:00	0.86	RB1 Schaprode w.	2017-12-11 09:40:00	5.1	1.6
																														GS Gellenstrom Hiddensee w.	2013-10-23 10:37:00	24.29	GS Gellenstrom Hiddensee w.	2013-08-26 09:36:00	0.72	GS Gellenstrom Hiddensee w.	2017-10-17 09:27:00	1.7	4	RB2 Vitte oe.	1990-09-03 09:16:00	54.9	RB2 Vitte oe.	1990-09-03 09:16:00	1.61	RB1 Schaprode w.	2018-01-29 09:50:00	22.5	0.8
																														GS Gellenstrom Hiddensee w.	2013-12-12 11:01:00	20.4	GS Gellenstrom Hiddensee w.	2013-09-24 09:13:00	0.68	GS Gellenstrom Hiddensee w.	2018-01-22 10:29:00	2	3.5	RB2 Vitte oe.	1990-09-03 09:16:00	54.6	RB2 Vitte oe.	1990-10-08 08:47:00	1.49	RB1 Schaprode w.	2018-02-26 10:05:00	4.3	1.1
																														GS Gellenstrom Hiddensee w.	2014-05-26 10:13:00	18.54	GS Gellenstrom Hiddensee w.	2013-10-23 10:37:00	0.82	GS Gellenstrom Hiddensee w.	2018-04-23 10:09:00	4.6	2.5	RB2 Vitte oe.	1990-10-08 08:47:00	46.6	RB2 Vitte oe.	1990-10-08 08:47:00	1.83	RB1 Schaprode w.	2018-03-27 09:20:00	6.8	1.5
																														GS Gellenstrom Hiddensee w.	2014-06-10 09:42:00	26.47	GS Gellenstrom Hiddensee w.	2013-12-12 11:01:00	0.78	GS Gellenstrom Hiddensee w.	2018-05-28 09:44:00	0.6	4	RB2 Vitte oe.	1990-10-08 08:47:00	52.3	RB2 Vitte oe.	1990-11-05 09:23:00	1.23	RB1 Schaprode w.	2018-04-24 09:40:00	24.9	1.3
																														GS Gellenstrom Hiddensee w.	2014-07-07 09:40:00	24.44	GS Gellenstrom Hiddensee w.	2014-05-26 10:13:00	0.55	GS Gellenstrom Hiddensee w.	2018-06-18 09:46:00	2.1	2.5	RB2 Vitte oe.	1990-11-05 09:23:00	34.2	RB2 Vitte oe.	1990-11-05 09:23:00	1.23	RB1 Schaprode w.	2018-05-28 11:30:00	8.6	1.1
																														GS Gellenstrom Hiddensee w.	2014-08-04 10:11:00	28.03	GS Gellenstrom Hiddensee w.	2014-06-10 09:42:00	0.72	GS Gellenstrom Hiddensee w.	2018-08-13 09:33:00	1.3	3	RB2 Vitte oe.	1990-11-05 09:23:00	39.8	RB2 Vitte oe.	1994-01-25 09:28:00	1.9	RB1 Schaprode w.	2018-06-25 14:15:00	5.5	1.3
																														GS Gellenstrom Hiddensee w.	2014-09-23 11:47:00	21.65	GS Gellenstrom Hiddensee w.	2014-07-07 09:40:00	0.89	GS Gellenstrom Hiddensee w.	2018-09-25 09:55:00	5.3	1	RB2 Vitte oe.	1994-01-25 09:28:00	33	RB2 Vitte oe.	1994-05-19 08:37:00	1.18	RB1 Schaprode w.	2018-07-23 11:45:00	1.9	1.4
																														GS Gellenstrom Hiddensee w.	2014-11-13 13:52:00	21.85	GS Gellenstrom Hiddensee w.	2014-08-04 10:11:00	0.75	GS Gellenstrom Hiddensee w.	2018-10-17 10:32:00	1.8	4.5	RB2 Vitte oe.	1994-05-19 08:37:00	38.3	RB2 Vitte oe.	1994-08-10 09:42:00	4.3	RB1 Schaprode w.	2018-08-27 12:10:00	5.9	1.9
																														GS Gellenstrom Hiddensee w.	2014-12-02 09:56:00	22.47	GS Gellenstrom Hiddensee w.	2014-09-23 11:47:00	0.62	GS Gellenstrom Hiddensee w.	2018-11-06 09:49:00	0.6	5	RB2 Vitte oe.	1994-08-10 09:42:00	61	RB2 Vitte oe.	1994-09-12 11:04:00	1.09	RB1 Schaprode w.	2018-10-22 12:15:00	1.9	2.4
																														GS Gellenstrom Hiddensee w.	2015-02-09 09:58:00	28.01	GS Gellenstrom Hiddensee w.	2014-11-13 13:52:00	0.82	GS Gellenstrom Hiddensee w.	2018-11-26 09:52:00	3.9	3.5	RB2 Vitte oe.	1994-09-12 11:04:00	41.9	RB2 Vitte oe.	1994-10-13 09:20:00	1.03	RB1 Schaprode w.	2018-11-19 11:30:00	10.1	2.3
																														GS Gellenstrom Hiddensee w.	2015-03-25 13:12:00	23.62	GS Gellenstrom Hiddensee w.	2014-12-02 09:56:00	0.98					RB2 Vitte oe.	1994-10-13 09:20:00	31.7	RB2 Vitte oe.	1994-11-29 09:46:00	1.17	RB1 Schaprode w.	2018-12-04 09:20:00	3.9	2.3
																														GS Gellenstrom Hiddensee w.	2015-05-26 09:50:00	16.24	GS Gellenstrom Hiddensee w.	2015-02-09 09:58:00	1.16					RB2 Vitte oe.	1994-11-29 09:46:00	29.6	RB2 Vitte oe.	1995-01-31 09:26:00	0.65	RB2 Vitte oe.	1990-04-26 08:43:00	1.3	2.8
																														GS Gellenstrom Hiddensee w.	2015-06-22 09:37:00	17.08	GS Gellenstrom Hiddensee w.	2015-03-25 13:12:00	0.74					RB2 Vitte oe.	1995-01-31 09:26:00	31.3	RB2 Vitte oe.	1995-02-27 10:47:00	0.82	RB2 Vitte oe.	1990-05-17 07:14:00	5.6	1.7
																														GS Gellenstrom Hiddensee w.	2015-07-20 09:54:00	19.55	GS Gellenstrom Hiddensee w.	2015-05-26 09:50:00	0.43					RB2 Vitte oe.	1995-02-27 10:47:00	71.5	RB2 Vitte oe.	1995-03-21 09:18:00	0.69	RB2 Vitte oe.	1990-08-06 14:53:00	2.4	0.8
																														GS Gellenstrom Hiddensee w.	2015-08-10 09:49:00	19.6	GS Gellenstrom Hiddensee w.	2015-06-22 09:37:00	0.56					RB2 Vitte oe.	1995-03-21 09:18:00	39.9	RB2 Vitte oe.	1995-04-24 09:36:00	0.65	RB2 Vitte oe.	1990-09-03 09:16:00	1.4	3
																														GS Gellenstrom Hiddensee w.	2015-09-23 10:17:00	18.03	GS Gellenstrom Hiddensee w.	2015-07-20 09:54:00	1.02					RB2 Vitte oe.	1995-04-24 09:36:00	20.9	RB2 Vitte oe.	1995-05-17 09:18:00	0.62	RB2 Vitte oe.	1990-10-08 08:47:00	4.3	1.2
																														GS Gellenstrom Hiddensee w.	2015-10-26 14:50:00	21.38	GS Gellenstrom Hiddensee w.	2015-08-10 09:49:00	0.87					RB2 Vitte oe.	1995-05-17 09:18:00	17.7	RB2 Vitte oe.	1995-07-24 09:25:00	1.65	RB2 Vitte oe.	1990-11-05 09:23:00	0.9	2.2
																														GS Gellenstrom Hiddensee w.	2015-11-26 10:26:00	30.54	GS Gellenstrom Hiddensee w.	2015-09-23 10:17:00	1.07					RB2 Vitte oe.	1995-07-24 09:25:00	26.4	RB2 Vitte oe.	1995-08-17 09:31:00	1.37	RB2 Vitte oe.	1991-01-14 09:39:00	5.8	1
																														GS Gellenstrom Hiddensee w.	2015-12-07 09:48:00	20.73	GS Gellenstrom Hiddensee w.	2015-10-26 14:50:00	1.16					RB2 Vitte oe.	1995-08-17 09:31:00	30.1	RB2 Vitte oe.	1995-09-07 10:55:00	1.13	RB2 Vitte oe.	1991-03-27 08:58:00	2.5	2.75
																														GS Gellenstrom Hiddensee w.	2016-03-14 09:39:00	27.57	GS Gellenstrom Hiddensee w.	2015-11-26 10:26:00	0.59					RB2 Vitte oe.	1995-09-07 10:55:00	27.3	RB2 Vitte oe.	1995-11-02 09:08:00	0.58	RB2 Vitte oe.	1991-04-09 09:08:00	5.9	1.25
																														GS Gellenstrom Hiddensee w.	2016-04-11 10:11:00	16.97	GS Gellenstrom Hiddensee w.	2015-12-07 09:48:00	0.95					RB2 Vitte oe.	1995-11-02 09:08:00	22.9	RB2 Vitte oe.	1996-04-25 09:19:00	0.61	RB2 Vitte oe.	1991-05-02 09:06:00	2.7	1.9
																														GS Gellenstrom Hiddensee w.	2016-05-18 10:56:00	18.96	GS Gellenstrom Hiddensee w.	2016-03-14 09:39:00	0.9					RB2 Vitte oe.	1996-04-25 09:19:00	22.6	RB2 Vitte oe.	1996-05-22 09:15:00	1.32	RB2 Vitte oe.	1991-06-06 08:54:00	1.8	3.1
																														GS Gellenstrom Hiddensee w.	2016-06-13 09:39:00	18.91	GS Gellenstrom Hiddensee w.	2016-04-11 10:11:00	0.5					RB2 Vitte oe.	1996-05-22 09:15:00	33.2	RB2 Vitte oe.	1996-06-20 09:20:00	0.96	RB2 Vitte oe.	1991-07-10 09:14:00	10.6	1.5
																														GS Gellenstrom Hiddensee w.	2016-07-25 09:41:00	18.24	GS Gellenstrom Hiddensee w.	2016-05-18 10:56:00	0.76					RB2 Vitte oe.	1996-06-20 09:20:00	22.4	RB2 Vitte oe.	1996-07-18 09:28:00	0.36	RB2 Vitte oe.	1991-08-01 08:53:00	12.6	1.6
																														GS Gellenstrom Hiddensee w.	2016-08-16 09:38:00	20.46	GS Gellenstrom Hiddensee w.	2016-06-13 09:39:00	0.8					RB2 Vitte oe.	1996-07-18 09:28:00	14.9	RB2 Vitte oe.	1996-08-15 09:28:00	1.23	RB2 Vitte oe.	1991-10-01 13:15:00	3.2	2.6
																														GS Gellenstrom Hiddensee w.	2016-10-10 09:43:00	22.54	GS Gellenstrom Hiddensee w.	2016-07-25 09:41:00	0.85					RB2 Vitte oe.	1996-08-15 09:28:00	33.7	RB2 Vitte oe.	1996-09-26 09:43:00	0.34	RB2 Vitte oe.	1991-11-04 09:13:00	1.6	2
																														GS Gellenstrom Hiddensee w.	2016-12-05 10:06:00	23.18	GS Gellenstrom Hiddensee w.	2016-08-16 09:38:00	0.54					RB2 Vitte oe.	1996-09-26 09:43:00	24	RB2 Vitte oe.	1996-10-10 09:56:00	1.05	RB2 Vitte oe.	1991-12-16 09:53:00	6.1	1.5
																														GS Gellenstrom Hiddensee w.	2017-03-27 09:32:00	19.95	GS Gellenstrom Hiddensee w.	2016-10-10 09:43:00	1.02					RB2 Vitte oe.	1996-10-10 09:56:00	21.7	RB2 Vitte oe.	1996-11-04 09:56:00	0.67	RB2 Vitte oe.	1992-02-13 09:50:00	1.4	1.7
																														GS Gellenstrom Hiddensee w.	2017-04-18 09:38:00	20.26	GS Gellenstrom Hiddensee w.	2016-12-05 10:06:00	0.99					RB2 Vitte oe.	1996-11-04 09:56:00	33.6	RB2 Vitte oe.	1996-12-11 10:07:00	0.88	RB2 Vitte oe.	1992-05-13 09:08:00	8.4	0.6
																														GS Gellenstrom Hiddensee w.	2017-05-15 09:30:00	20.24	GS Gellenstrom Hiddensee w.	2017-03-27 09:32:00	0.55					RB2 Vitte oe.	1996-12-11 10:07:00	41.1	RB2 Vitte oe.	1997-03-24 09:55:00	1.22	RB2 Vitte oe.	1992-07-15 09:07:00	16.7	0.6
																														GS Gellenstrom Hiddensee w.	2017-06-12 09:54:00	20.8	GS Gellenstrom Hiddensee w.	2017-04-18 09:38:00	1.01					RB2 Vitte oe.	1997-03-24 09:55:00	34.9	RB2 Vitte oe.	1997-04-17 09:38:00	0.66	RB2 Vitte oe.	1992-11-04 09:50:00	6.4	0.56
																														GS Gellenstrom Hiddensee w.	2017-07-27 15:19:00	28.12	GS Gellenstrom Hiddensee w.	2017-05-15 09:30:00	0.69					RB2 Vitte oe.	1997-04-17 09:38:00	27.8	RB2 Vitte oe.	1997-05-27 09:36:00	0.84	RB2 Vitte oe.	1993-07-28 09:15:00	3.9	2.3
																														GS Gellenstrom Hiddensee w.	2017-08-14 09:49:00	20.9	GS Gellenstrom Hiddensee w.	2017-06-12 09:54:00	0.79					RB2 Vitte oe.	1997-05-27 09:36:00	31.7	RB2 Vitte oe.	1997-08-11 11:52:00	1.87	RB2 Vitte oe.	1993-08-11 11:40:00	1.5	1.9
																														GS Gellenstrom Hiddensee w.	2017-10-17 09:27:00	18.5	GS Gellenstrom Hiddensee w.	2017-07-27 15:19:00	1.28					RB2 Vitte oe.	1997-08-11 11:52:00	52.7	RB2 Vitte oe.	1997-09-11 09:30:00	1.07	RB2 Vitte oe.	1993-09-13 10:15:00	1.6	2.8
																														GS Gellenstrom Hiddensee w.	2018-01-22 10:29:00	23.72	GS Gellenstrom Hiddensee w.	2017-08-14 09:49:00	0.77					RB2 Vitte oe.	1997-09-11 09:30:00	31	RB2 Vitte oe.	1997-10-28 09:33:00	0.42	RB2 Vitte oe.	1993-10-21 08:51:00	2.5	2.1
																														GS Gellenstrom Hiddensee w.	2018-04-23 10:09:00	30.59	GS Gellenstrom Hiddensee w.	2017-10-17 09:27:00	0.92					RB2 Vitte oe.	1997-10-28 09:33:00	27.7	RB2 Vitte oe.	1997-11-24 09:38:00	0.59	RB2 Vitte oe.	1994-01-25 09:28:00	4.4	0.62
																														GS Gellenstrom Hiddensee w.	2018-05-28 09:44:00	19.7	GS Gellenstrom Hiddensee w.	2018-01-22 10:29:00	1.01					RB2 Vitte oe.	1997-11-24 09:38:00	26.3	RB2 Vitte oe.	1997-12-15 10:35:00	1.04	RB2 Vitte oe.	1994-05-19 08:37:00	7.7	0.5
																														GS Gellenstrom Hiddensee w.	2018-06-18 09:46:00	22.28	GS Gellenstrom Hiddensee w.	2018-04-23 10:09:00	0.82					RB2 Vitte oe.	1997-12-15 10:35:00	29	RB2 Vitte oe.	1998-03-02 11:15:00	1.2	RB2 Vitte oe.	1994-08-10 09:42:00	28.4	0.6
																														GS Gellenstrom Hiddensee w.	2018-08-13 09:33:00	22.36	GS Gellenstrom Hiddensee w.	2018-05-28 09:44:00	0.69					RB2 Vitte oe.	1998-03-02 11:15:00	41.3	RB2 Vitte oe.	1998-03-12 12:42:00	0.69	RB2 Vitte oe.	1994-09-12 11:04:00	17	0.85
																														GS Gellenstrom Hiddensee w.	2018-09-25 09:55:00	21.22	GS Gellenstrom Hiddensee w.	2018-06-18 09:46:00	1.06					RB2 Vitte oe.	1998-03-12 12:42:00	31.6	RB2 Vitte oe.	1998-05-13 10:20:00	0.78	RB2 Vitte oe.	1994-10-13 09:20:00	6.6	0.7
																														GS Gellenstrom Hiddensee w.	2018-10-17 10:32:00	20.73	GS Gellenstrom Hiddensee w.	2018-08-13 09:33:00	0.84					RB2 Vitte oe.	1998-05-13 10:20:00	36.7	RB2 Vitte oe.	1998-06-18 09:38:00	1.13	RB2 Vitte oe.	1994-11-29 09:46:00	7.8	0.4
																														GS Gellenstrom Hiddensee w.	2018-11-06 09:49:00	21.41	GS Gellenstrom Hiddensee w.	2018-09-25 09:55:00	1.15					RB2 Vitte oe.	1998-06-18 09:38:00	32.1	RB2 Vitte oe.	1998-07-06 09:05:00	1.62	RB2 Vitte oe.	1995-01-31 09:26:00	5.2	0.9
																														GS Gellenstrom Hiddensee w.	2018-11-26 09:52:00	28.8	GS Gellenstrom Hiddensee w.	2018-10-17 10:32:00	1.07					RB2 Vitte oe.	1998-07-06 09:05:00	36.7	RB2 Vitte oe.	1998-08-06 09:03:00	1.13	RB2 Vitte oe.	1995-02-27 10:47:00	6.4	1.55
																																	GS Gellenstrom Hiddensee w.	2018-11-06 09:49:00	1.53					RB2 Vitte oe.	1998-08-06 09:03:00	38.4	RB2 Vitte oe.	1998-09-28 10:32:00	0.76	RB2 Vitte oe.	1995-03-21 09:18:00	5.4	0.9
																																	GS Gellenstrom Hiddensee w.	2018-11-26 09:52:00	1					RB2 Vitte oe.	1998-09-28 10:32:00	36.5	RB2 Vitte oe.	1998-10-27 09:40:00	1.66	RB2 Vitte oe.	1995-04-24 09:36:00	2.3	1
																																								RB2 Vitte oe.	1998-10-27 09:40:00	48	RB2 Vitte oe.	1999-01-28 09:30:00	0.72	RB2 Vitte oe.	1995-05-17 09:18:00	4.4	0.75
																																								RB2 Vitte oe.	1999-01-28 09:30:00	45.5	RB2 Vitte oe.	1999-03-03 09:19:00	0.52	RB2 Vitte oe.	1995-07-24 09:25:00	4	1.65
																																								RB2 Vitte oe.	1999-03-03 09:19:00	31.2	RB2 Vitte oe.	1999-05-31 09:25:00	1.69	RB2 Vitte oe.	1995-08-17 09:31:00	6.9	1.61
																																								RB2 Vitte oe.	1999-05-31 09:25:00	41.8	RB2 Vitte oe.	1999-06-17 09:50:00	2.03	RB2 Vitte oe.	1995-09-07 10:55:00	3.4	2.65
																																								RB2 Vitte oe.	1999-06-17 09:50:00	53.7	RB2 Vitte oe.	1999-07-08 09:45:00	0.77	RB2 Vitte oe.	1995-11-02 09:08:00	2.3	2.4
																																								RB2 Vitte oe.	1999-07-08 09:45:00	29.5	RB2 Vitte oe.	1999-08-11 09:17:00	0.62	RB2 Vitte oe.	1996-04-25 09:19:00	2.8	3
																																								RB2 Vitte oe.	1999-08-11 09:17:00	30.6	RB2 Vitte oe.	1999-09-30 10:40:00	1.5	RB2 Vitte oe.	1996-05-22 09:15:00	3.8	1.6
																																								RB2 Vitte oe.	1999-09-30 10:40:00	65	RB2 Vitte oe.	1999-11-11 09:55:00	0.77	RB2 Vitte oe.	1996-06-20 09:20:00	4.1	0.75
																																								RB2 Vitte oe.	1999-11-11 09:55:00	36.8	RB2 Vitte oe.	1999-12-09 10:06:00	0.91	RB2 Vitte oe.	1996-07-18 09:28:00	1.9	1.2
																																								RB2 Vitte oe.	1999-12-09 10:06:00	40.7	RB2 Vitte oe.	2000-01-19 10:00:00	1.24	RB2 Vitte oe.	1996-08-15 09:28:00	5	1.2
																																								RB2 Vitte oe.	2000-01-19 10:00:00	36.2	RB2 Vitte oe.	2000-02-28 09:42:00	0.44	RB2 Vitte oe.	1996-09-26 09:43:00	1.5	3
																																								RB2 Vitte oe.	2000-02-28 09:42:00	52.7	RB2 Vitte oe.	2000-03-06 09:32:00	0.36	RB2 Vitte oe.	1996-10-10 09:56:00	3.2	1.55
																																								RB2 Vitte oe.	2000-03-06 09:32:00	35	RB2 Vitte oe.	2000-04-06 09:40:00	0.62	RB2 Vitte oe.	1996-11-04 09:56:00	1.8	1.45
																																								RB2 Vitte oe.	2000-04-06 09:40:00	21.1	RB2 Vitte oe.	2000-05-09 16:13:00	2.31	RB2 Vitte oe.	1996-12-11 10:07:00	5.4	2.1
																																								RB2 Vitte oe.	2000-05-09 16:13:00	42.6	RB2 Vitte oe.	2000-06-22 09:30:00	1.38	RB2 Vitte oe.	1997-03-24 09:55:00	6.1	1.7
																																								RB2 Vitte oe.	2000-06-22 09:30:00	41	RB2 Vitte oe.	2000-07-27 09:35:00	0.61	RB2 Vitte oe.	1997-04-17 09:38:00	4	1.4
																																								RB2 Vitte oe.	2000-07-27 09:35:00	27.5	RB2 Vitte oe.	2000-08-15 09:32:00	0.6	RB2 Vitte oe.	1997-05-27 09:36:00	3.3	2.4
																																								RB2 Vitte oe.	2000-08-15 09:32:00	27.6	RB2 Vitte oe.	2000-09-11 09:42:00	0.51	RB2 Vitte oe.	1997-08-11 11:52:00	7.6	1.3
																																								RB2 Vitte oe.	2000-09-11 09:42:00	27.7	RB2 Vitte oe.	2000-10-26 09:45:00	0.43	RB2 Vitte oe.	1997-09-11 09:30:00	4.5	0.9
																																								RB2 Vitte oe.	2000-10-26 09:45:00	36.7	RB2 Vitte oe.	2000-11-30 09:21:00	0.44	RB2 Vitte oe.	1997-10-28 09:33:00	0.8
																																								RB2 Vitte oe.	2000-11-30 09:21:00	28.3	RB2 Vitte oe.	2001-01-03 10:00:00	0.71	RB2 Vitte oe.	1997-11-24 09:38:00	1.5	3.5
																																								RB2 Vitte oe.	2001-01-03 10:00:00	31.4	RB2 Vitte oe.	2001-02-01 09:55:00	0.52	RB2 Vitte oe.	1997-12-15 10:35:00	2.3	1.8
																																								RB2 Vitte oe.	2001-02-01 09:55:00	24.7	RB2 Vitte oe.	2001-03-01 09:02:00	0.58	RB2 Vitte oe.	1998-03-02 11:15:00	7.7	0.6
																																								RB2 Vitte oe.	2001-03-01 09:02:00	21.2	RB2 Vitte oe.	2001-04-23 10:09:00	2.25	RB2 Vitte oe.	1998-03-12 12:42:00	1.9	1.8
																																								RB2 Vitte oe.	2001-04-23 10:09:00	31.9	RB2 Vitte oe.	2001-05-29 09:12:00	0.83	RB2 Vitte oe.	1998-05-13 10:20:00	6.1	1.2
																																								RB2 Vitte oe.	2001-05-29 09:12:00	22.5	RB2 Vitte oe.	2001-06-28 09:45:00	0.91	RB2 Vitte oe.	1998-06-18 09:38:00	6.1	1.1
																																								RB2 Vitte oe.	2001-06-28 09:45:00	27.1	RB2 Vitte oe.	2001-07-24 09:36:00	3.49	RB2 Vitte oe.	1998-07-06 09:05:00	8.8	1.2
																																								RB2 Vitte oe.	2001-07-24 09:36:00	55.3	RB2 Vitte oe.	2001-08-21 10:03:00	1.48	RB2 Vitte oe.	1998-08-06 09:03:00	6.3	1.1
																																								RB2 Vitte oe.	2001-08-21 10:03:00	41.2	RB2 Vitte oe.	2001-09-12 15:55:00	0.89	RB2 Vitte oe.	1998-09-28 10:32:00	5.1	2
																																								RB2 Vitte oe.	2001-09-12 15:55:00	28.8	RB2 Vitte oe.	2001-10-01 09:35:00	0.99	RB2 Vitte oe.	1998-10-27 09:40:00	8.8	0.9
																																								RB2 Vitte oe.	2001-10-01 09:35:00	29.5	RB2 Vitte oe.	2001-11-22 09:44:00	1.26	RB2 Vitte oe.	1999-01-28 09:30:00	1.8	1.8
																																								RB2 Vitte oe.	2001-11-22 09:44:00	30.1	RB2 Vitte oe.	2002-01-31 09:35:00	1.14	RB2 Vitte oe.	1999-03-03 09:19:00	2.2	1.5
																																								RB2 Vitte oe.	2002-01-31 09:35:00	43.5	RB2 Vitte oe.	2002-02-11 09:25:00	0.84	RB2 Vitte oe.	1999-05-31 09:25:00	8.2	1.4
																																								RB2 Vitte oe.	2002-02-11 09:25:00	68.8	RB2 Vitte oe.	2002-03-27 09:25:00	0.45	RB2 Vitte oe.	1999-06-17 09:50:00	9.2	0.8
																																								RB2 Vitte oe.	2002-03-27 09:25:00	29.7	RB2 Vitte oe.	2002-04-25 09:46:00	0.73	RB2 Vitte oe.	1999-07-08 09:45:00	4.8	1.7
																																								RB2 Vitte oe.	2002-04-25 09:46:00	21.3	RB2 Vitte oe.	2002-05-16 09:50:00	1.22	RB2 Vitte oe.	1999-08-11 09:17:00	2.6	2.1
																																								RB2 Vitte oe.	2002-05-16 09:50:00	31.3	RB2 Vitte oe.	2002-06-25 13:10:00	1.12	RB2 Vitte oe.	1999-09-30 10:40:00	10.3	1.5
																																								RB2 Vitte oe.	2002-06-25 13:10:00	30.3	RB2 Vitte oe.	2002-08-13 12:00:00	1.84	RB2 Vitte oe.	1999-11-11 09:55:00	5.9	1.6
																																								RB2 Vitte oe.	2002-08-13 12:00:00	39.9	RB2 Vitte oe.	2002-09-26 14:20:00	0.91	RB2 Vitte oe.	2000-01-19 10:00:00	5.3	0.25
																																								RB2 Vitte oe.	2002-09-26 14:20:00	27.9	RB2 Vitte oe.	2002-11-25 09:40:00	0.5	RB2 Vitte oe.	2000-02-28 09:42:00	4.8	1.1
																																								RB2 Vitte oe.	2002-11-25 09:40:00	40.6	RB2 Vitte oe.	2003-04-10 12:31:00	2.2	RB2 Vitte oe.	2000-03-06 09:32:00	5.1	0.9
																																								RB2 Vitte oe.	2003-04-10 12:31:00	29	RB2 Vitte oe.	2003-05-08 11:30:00	0.34	RB2 Vitte oe.	2000-04-06 09:40:00	4.3	0.9
																																								RB2 Vitte oe.	2003-05-08 11:30:00	35	RB2 Vitte oe.	2003-07-30 13:20:00	2.58	RB2 Vitte oe.	2000-05-09 16:13:00	6	1.8
																																								RB2 Vitte oe.	2003-07-30 13:20:00	38.5	RB2 Vitte oe.	2003-08-07 10:45:00	2.12	RB2 Vitte oe.	2000-06-22 09:30:00	16.4	0.9
																																								RB2 Vitte oe.	2003-08-07 10:45:00	31.7	RB2 Vitte oe.	2004-02-16 09:00:00	0.75	RB2 Vitte oe.	2000-07-27 09:35:00	3.9	1.8
																																								RB2 Vitte oe.	2004-02-16 09:00:00	21.4	RB2 Vitte oe.	2004-03-17 09:15:00	0.96	RB2 Vitte oe.	2000-08-15 09:32:00	3.5	1.9
																																								RB2 Vitte oe.	2004-03-17 09:15:00	30.5	RB2 Vitte oe.	2004-04-27 07:40:00	0.87	RB2 Vitte oe.	2000-09-11 09:42:00	4.8	2.7
																																								RB2 Vitte oe.	2004-04-27 07:40:00	26.3	RB2 Vitte oe.	2004-05-13 07:48:00	0.88	RB2 Vitte oe.	2000-10-26 09:45:00	6.1	1.2
																																								RB2 Vitte oe.	2004-05-13 07:48:00	27.4	RB2 Vitte oe.	2004-06-14 07:55:00	0.98	RB2 Vitte oe.	2000-11-30 09:21:00	2.1	2.9
																																								RB2 Vitte oe.	2004-06-14 07:55:00	25.2	RB2 Vitte oe.	2004-07-05 07:43:00	1.14	RB2 Vitte oe.	2001-01-03 10:00:00	3.5	2.8
																																								RB2 Vitte oe.	2004-07-05 07:43:00	22.4	RB2 Vitte oe.	2004-08-10 12:58:00	1.67	RB2 Vitte oe.	2001-02-01 09:55:00	2.1	2.8
																																								RB2 Vitte oe.	2004-08-10 12:58:00	38.7	RB2 Vitte oe.	2004-09-23 07:44:00	1.07	RB2 Vitte oe.	2001-03-01 09:02:00	1.4	3.7
																																								RB2 Vitte oe.	2004-09-23 07:44:00	34.5	RB2 Vitte oe.	2004-10-28 07:44:00	3.3	RB2 Vitte oe.	2001-04-23 10:09:00	2	2.8
																																								RB2 Vitte oe.	2004-10-28 07:44:00	31.2	RB2 Vitte oe.	2004-11-17 07:50:00	0.86	RB2 Vitte oe.	2001-05-29 09:12:00	2.3	2.6
																																								RB2 Vitte oe.	2004-11-17 07:50:00	29.4	RB2 Vitte oe.	2004-12-15 07:55:00	0.9	RB2 Vitte oe.	2001-06-28 09:45:00	2.9	2.8
																																								RB2 Vitte oe.	2004-12-15 07:55:00	27.5	RB2 Vitte oe.	2005-01-19 08:03:00	0.76	RB2 Vitte oe.	2001-07-24 09:36:00	8.6	1.9
																																								RB2 Vitte oe.	2005-01-19 08:03:00	36.6	RB2 Vitte oe.	2005-02-16 07:43:00	1.21	RB2 Vitte oe.	2001-08-21 10:03:00	8.9	1.8
																																								RB2 Vitte oe.	2005-02-16 07:43:00	38.5	RB2 Vitte oe.	2005-03-22 13:09:00	0.79	RB2 Vitte oe.	2001-09-12 15:55:00	2.5	1.6
																																								RB2 Vitte oe.	2005-03-22 13:09:00	29.1	RB2 Vitte oe.	2005-04-26 07:50:00	0.97	RB2 Vitte oe.	2001-10-01 09:35:00	2.6	2.5
																																								RB2 Vitte oe.	2005-04-26 07:50:00	26.6	RB2 Vitte oe.	2005-05-19 12:58:00	0.91	RB2 Vitte oe.	2001-11-22 09:44:00	7.9	0.6
																																								RB2 Vitte oe.	2005-05-19 12:58:00	27	RB2 Vitte oe.	2005-06-13 07:42:00	0.9	RB2 Vitte oe.	2002-01-31 09:35:00	7	1.2
																																								RB2 Vitte oe.	2005-06-13 07:42:00	24.1	RB2 Vitte oe.	2005-07-12 07:42:00	2.29	RB2 Vitte oe.	2002-02-11 09:25:00	5.1	1.8
																																								RB2 Vitte oe.	2005-07-12 07:42:00	43.9	RB2 Vitte oe.	2005-08-16 12:21:00	1.14	RB2 Vitte oe.	2002-03-27 09:25:00	4.7	2.2
																																								RB2 Vitte oe.	2005-08-16 12:21:00	31	RB2 Vitte oe.	2005-09-13 07:38:00	0.1	RB2 Vitte oe.	2002-04-25 09:46:00	1.4	2.5
																																								RB2 Vitte oe.	2005-09-13 07:38:00	25.6	RB2 Vitte oe.	2005-10-18 07:45:00	0.82	RB2 Vitte oe.	2002-05-16 09:50:00	2.2	2.3
																																								RB2 Vitte oe.	2005-10-18 07:45:00	31.2	RB2 Vitte oe.	2005-11-01 13:08:00	0.58	RB2 Vitte oe.	2002-06-25 13:10:00	5.9	1.6
																																								RB2 Vitte oe.	2005-11-01 13:08:00	31.3	RB2 Vitte oe.	2005-12-07 08:25:00	0.78	RB2 Vitte oe.	2002-08-13 12:00:00	11.8	2.2
																																								RB2 Vitte oe.	2005-12-07 08:25:00	24.7	RB2 Vitte oe.	2006-04-19 07:52:00	0.78	RB2 Vitte oe.	2002-09-26 14:20:00	2.2	3.2
																																								RB2 Vitte oe.	2006-04-19 07:52:00	24.7	RB2 Vitte oe.	2006-05-10 07:51:00	1.12	RB2 Vitte oe.	2002-11-25 09:40:00	1.9	3.5
																																								RB2 Vitte oe.	2006-05-10 07:51:00	32.8	RB2 Vitte oe.	2006-06-15 07:10:00	1.79	RB2 Vitte oe.	2003-04-10 12:31:00	2.3	1
																																								RB2 Vitte oe.	2006-06-15 07:10:00	32.6	RB2 Vitte oe.	2006-07-17 07:10:00	2.44	RB2 Vitte oe.	2003-05-08 11:30:00	2.5	2.5
																																								RB2 Vitte oe.	2006-07-17 07:10:00	48.9	RB2 Vitte oe.	2006-08-09 07:40:00	1.94	RB2 Vitte oe.	2003-07-30 13:20:00	5.9	1.9
																																								RB2 Vitte oe.	2006-08-09 07:40:00	50.1	RB2 Vitte oe.	2006-09-11 09:05:00	0.93	RB2 Vitte oe.	2003-08-07 10:45:00	5.9	2
																																								RB2 Vitte oe.	2006-09-11 09:05:00	22.8	RB2 Vitte oe.	2006-10-05 08:05:00	0.92	RB2 Vitte oe.	2004-02-16 09:00:00	1.6	2
																																								RB2 Vitte oe.	2006-10-05 08:05:00	37.5	RB2 Vitte oe.	2006-11-20 08:15:00	0.62	RB2 Vitte oe.	2004-03-17 09:15:00	3.7	1.8
																																								RB2 Vitte oe.	2006-11-20 08:15:00	24.5	RB2 Vitte oe.	2006-12-04 08:10:00	0.62	RB2 Vitte oe.	2004-04-27 07:40:00	2.4	3.1
																																								RB2 Vitte oe.	2006-12-04 08:10:00	24.8	RB2 Vitte oe.	2007-01-09 13:50:00	0.72	RB2 Vitte oe.	2004-05-13 07:48:00	2.6	3
																																								RB2 Vitte oe.	2007-01-09 13:50:00	35.58	RB2 Vitte oe.	2007-01-29 08:35:00	0.69	RB2 Vitte oe.	2004-06-14 07:55:00	1.7	1.7
																																								RB2 Vitte oe.	2007-01-29 08:35:00	23.38	RB2 Vitte oe.	2007-02-12 08:10:00	1.41	RB2 Vitte oe.	2004-07-05 07:43:00	5	3.2
																																								RB2 Vitte oe.	2007-02-12 08:10:00	35.87	RB2 Vitte oe.	2007-03-12 07:35:00	0.97	RB2 Vitte oe.	2004-08-10 12:58:00	4.7
																																								RB2 Vitte oe.	2007-03-12 07:35:00	39.73	RB2 Vitte oe.	2007-04-24 08:15:00	0.81	RB2 Vitte oe.	2004-09-23 07:44:00	6.5	1.8
																																								RB2 Vitte oe.	2007-04-24 08:15:00	20.62	RB2 Vitte oe.	2007-05-14 08:40:00	1.23	RB2 Vitte oe.	2004-10-28 07:44:00	7.8	2.4
																																								RB2 Vitte oe.	2007-05-14 08:40:00	29.43	RB2 Vitte oe.	2007-06-11 07:40:00	2.09	RB2 Vitte oe.	2004-11-17 07:50:00	2.4	2.2
																																								RB2 Vitte oe.	2007-06-11 07:40:00	47.08	RB2 Vitte oe.	2007-07-11 07:20:00	1.7	RB2 Vitte oe.	2004-12-15 07:55:00	4.2
																																								RB2 Vitte oe.	2007-07-11 07:20:00	35.49	RB2 Vitte oe.	2007-08-16 08:01:00	1.72	RB2 Vitte oe.	2005-01-19 08:03:00	4.1	2.6
																																								RB2 Vitte oe.	2007-08-16 08:01:00	48.28	RB2 Vitte oe.	2007-09-13 08:20:00	0.95	RB2 Vitte oe.	2005-02-16 07:43:00	10.9	0.4
																																								RB2 Vitte oe.	2007-09-13 08:20:00	26.38	RB2 Vitte oe.	2007-10-17 08:50:00	0.81	RB2 Vitte oe.	2005-03-22 13:09:00	8.1	1.4
																																								RB2 Vitte oe.	2007-10-17 08:50:00	22.48	RB2 Vitte oe.	2007-11-19 13:20:00	1.03	RB2 Vitte oe.	2005-04-26 07:50:00	2.1	2.1
																																								RB2 Vitte oe.	2007-11-19 13:20:00	20.94	RB2 Vitte oe.	2008-01-21 14:13:00	1.03	RB2 Vitte oe.	2005-05-19 12:58:00	1.8	2.3
																																								RB2 Vitte oe.	2008-01-21 14:13:00	28.75	RB2 Vitte oe.	2008-02-19 07:40:00	1.99	RB2 Vitte oe.	2005-06-13 07:42:00	7.3	1.9
																																								RB2 Vitte oe.	2008-02-19 07:40:00	38.28	RB2 Vitte oe.	2008-03-27 15:58:00	0.53	RB2 Vitte oe.	2005-07-12 07:42:00	12.7	1.4
																																								RB2 Vitte oe.	2008-03-27 15:58:00	38.09	RB2 Vitte oe.	2008-04-14 12:42:00	0.69	RB2 Vitte oe.	2005-08-16 12:21:00	3.1	3.2
																																								RB2 Vitte oe.	2008-04-14 12:42:00	33.4	RB2 Vitte oe.	2008-05-05 12:38:00	0.86	RB2 Vitte oe.	2005-09-13 07:38:00	3.3	3
																																								RB2 Vitte oe.	2008-05-05 12:38:00	34.49	RB2 Vitte oe.	2008-06-04 11:51:00	2.93	RB2 Vitte oe.	2005-10-18 07:45:00	3.5	2.9
																																								RB2 Vitte oe.	2008-06-04 11:51:00	30.22	RB2 Vitte oe.	2008-07-14 09:20:00	5.99	RB2 Vitte oe.	2005-11-01 13:08:00	1.3	3
																																								RB2 Vitte oe.	2008-07-14 09:20:00	59.5	RB2 Vitte oe.	2008-08-06 07:46:00	2.01	RB2 Vitte oe.	2005-12-07 08:25:00	2.1	3
																																								RB2 Vitte oe.	2008-08-06 07:46:00	36.89	RB2 Vitte oe.	2008-09-08 07:12:00	1.23	RB2 Vitte oe.	2006-04-19 07:52:00	2	2.6
																																								RB2 Vitte oe.	2008-09-08 07:12:00	18.52	RB2 Vitte oe.	2008-10-07 07:48:00	1.27	RB2 Vitte oe.	2006-05-10 07:51:00	2.7	2.8
																																								RB2 Vitte oe.	2008-10-07 07:48:00	28.84	RB2 Vitte oe.	2008-11-04 07:35:00	1.05	RB2 Vitte oe.	2006-06-15 07:10:00	4.1	3.1
																																								RB2 Vitte oe.	2008-11-04 07:35:00	27.19	RB2 Vitte oe.	2008-11-24 13:15:00	0.78	RB2 Vitte oe.	2006-07-17 07:10:00	14.6	1.3
																																								RB2 Vitte oe.	2008-11-24 13:15:00	37.03	RB2 Vitte oe.	2009-02-25 11:51:00	0.58	RB2 Vitte oe.	2006-08-09 07:40:00	14.2	1.8
																																								RB2 Vitte oe.	2009-02-25 11:51:00	70.28	RB2 Vitte oe.	2009-03-18 10:05:00	0.76	RB2 Vitte oe.	2006-09-11 09:05:00	5.9	3.2
																																								RB2 Vitte oe.	2009-03-18 10:05:00	32.09	RB2 Vitte oe.	2009-04-20 13:10:00	0.64	RB2 Vitte oe.	2006-10-05 08:05:00	9.3	2.8
																																								RB2 Vitte oe.	2009-04-20 13:10:00	46.16	RB2 Vitte oe.	2009-05-11 12:19:00	0.58	RB2 Vitte oe.	2006-11-20 08:15:00	2.4	2.8
																																								RB2 Vitte oe.	2009-05-11 12:19:00	46.99	RB2 Vitte oe.	2009-06-16 08:15:00	0.9	RB2 Vitte oe.	2006-12-04 08:10:00	4.8	1.9
																																								RB2 Vitte oe.	2009-06-16 08:15:00	33.13	RB2 Vitte oe.	2009-07-07 14:48:00	0.8	RB2 Vitte oe.	2007-01-09 13:50:00	3.9	1.9
																																								RB2 Vitte oe.	2009-07-07 14:48:00	39.02	RB2 Vitte oe.	2009-08-11 08:40:00	1.96	RB2 Vitte oe.	2007-01-29 08:35:00	4.1	0.4
																																								RB2 Vitte oe.	2009-08-11 08:40:00	50.44	RB2 Vitte oe.	2009-09-22 13:13:00	1.23	RB2 Vitte oe.	2007-02-12 08:10:00	5.7	0.9
																																								RB2 Vitte oe.	2009-09-22 13:13:00	35.59	RB2 Vitte oe.	2009-10-27 08:50:00	0.6	RB2 Vitte oe.	2007-03-12 07:35:00	4.8
																																								RB2 Vitte oe.	2009-10-27 08:50:00	28.05	RB2 Vitte oe.	2009-12-01 08:20:00	0.48	RB2 Vitte oe.	2007-04-24 08:15:00	1.5	2.4
																																								RB2 Vitte oe.	2009-12-01 08:20:00	31.91	RB2 Vitte oe.	2009-12-09 07:45:00	0.66	RB2 Vitte oe.	2007-05-14 08:40:00	3.8	2.8
																																								RB2 Vitte oe.	2009-12-09 07:45:00	33.35	RB2 Vitte oe.	2010-03-29 07:15:00	1.31	RB2 Vitte oe.	2007-06-11 07:40:00	17	1.1
																																								RB2 Vitte oe.	2010-03-29 07:15:00	35.81	RB2 Vitte oe.	2010-05-31 07:50:00	0.64	RB2 Vitte oe.	2007-07-11 07:20:00	11.7	1.8
																																								RB2 Vitte oe.	2010-05-31 07:50:00	22.95	RB2 Vitte oe.	2010-06-29 07:10:00	1.52	RB2 Vitte oe.	2007-08-16 08:01:00	7.6	2.1
																																								RB2 Vitte oe.	2010-06-29 07:10:00	40.87	RB2 Vitte oe.	2010-07-05 08:42:00	1.91	RB2 Vitte oe.	2007-09-13 08:20:00	2.8	2.3
																																								RB2 Vitte oe.	2010-07-05 08:42:00	49	RB2 Vitte oe.	2010-08-30 09:52:00	1.8	RB2 Vitte oe.	2007-10-17 08:50:00	2.2	2.3
																																								RB2 Vitte oe.	2010-08-30 09:52:00	50.44	RB2 Vitte oe.	2010-09-20 08:25:00	1.36	RB2 Vitte oe.	2007-11-19 13:20:00	3.3	1.8
																																								RB2 Vitte oe.	2010-09-20 08:25:00	42.84	RB2 Vitte oe.	2010-10-27 07:40:00	1.318	RB2 Vitte oe.	2007-12-18 14:10:00	3.1	2.7
																																								RB2 Vitte oe.	2010-10-27 07:40:00	34.458	RB2 Vitte oe.	2010-11-30 14:45:00	1.058	RB2 Vitte oe.	2008-01-21 14:13:00	6.4	1.6
																																								RB2 Vitte oe.	2010-11-30 14:45:00	28.198	RB2 Vitte oe.	2011-03-31 13:30:00	1.374	RB2 Vitte oe.	2008-02-19 07:40:00	3.8	1.4
																																								RB2 Vitte oe.	2011-03-31 13:30:00	57.317	RB2 Vitte oe.	2011-04-19 11:35:00	0.81	RB2 Vitte oe.	2008-03-27 15:58:00	2.9	1.7
																																								RB2 Vitte oe.	2011-04-19 11:35:00	27.304	RB2 Vitte oe.	2011-05-24 11:10:00	1.173	RB2 Vitte oe.	2008-04-14 12:42:00	10.3	1.5
																																								RB2 Vitte oe.	2011-05-24 11:10:00	51.823	RB2 Vitte oe.	2011-06-22 11:00:00	1.583	RB2 Vitte oe.	2008-05-05 12:38:00	12.2	1.1
																																								RB2 Vitte oe.	2011-06-22 11:00:00	48.64	RB2 Vitte oe.	2011-07-27 10:25:00	1.378	RB2 Vitte oe.	2008-06-04 11:51:00	9.6	0.8
																																								RB2 Vitte oe.	2011-07-27 10:25:00	38.285	RB2 Vitte oe.	2011-08-31 11:30:00	2.241	RB2 Vitte oe.	2008-07-14 09:20:00	20.4	1.1
																																								RB2 Vitte oe.	2011-08-31 11:30:00	59.214	RB2 Vitte oe.	2011-09-27 13:25:00	1.191	RB2 Vitte oe.	2008-08-06 07:46:00	12.3	1.4
																																								RB2 Vitte oe.	2011-09-27 13:25:00	46.649	RB2 Vitte oe.	2011-11-08 14:40:00	0.872	RB2 Vitte oe.	2008-09-08 07:12:00	7.3	2.4
																																								RB2 Vitte oe.	2011-11-08 14:40:00	40.419	RB2 Vitte oe.	2011-11-30 10:55:00	1.008	RB2 Vitte oe.	2008-10-07 07:48:00	6	2.3
																																								RB2 Vitte oe.	2011-11-30 10:55:00	38.066	RB2 Vitte oe.	2011-12-12 12:30:00	1.683	RB2 Vitte oe.	2008-11-04 07:35:00	4.2	1.7
																																								RB2 Vitte oe.	2011-12-12 12:30:00	44.921	RB2 Vitte oe.	2012-01-16 15:35:00	1.09	RB2 Vitte oe.	2009-02-25 11:51:00	3.1	1.5
																																								RB2 Vitte oe.	2012-01-16 15:35:00	35.54	RB2 Vitte oe.	2012-03-06 10:50:00	0.65	RB2 Vitte oe.	2009-03-18 10:05:00	5.3	1.4
																																								RB2 Vitte oe.	2012-03-06 10:50:00	35.17	RB2 Vitte oe.	2012-03-27 10:00:00	0.8	RB2 Vitte oe.	2009-04-20 13:10:00	2.6	1.8
																																								RB2 Vitte oe.	2012-03-27 10:00:00	25.64	RB2 Vitte oe.	2012-04-23 12:35:00	0.68	RB2 Vitte oe.	2009-05-11 12:19:00	4.4	2.1
																																								RB2 Vitte oe.	2012-04-23 12:35:00	23.6	RB2 Vitte oe.	2012-05-29 11:47:00	1.5	RB2 Vitte oe.	2009-06-16 08:15:00	2.8	3
																																								RB2 Vitte oe.	2012-05-29 11:47:00	37.07	RB2 Vitte oe.	2012-06-26 10:55:00	1.9	RB2 Vitte oe.	2009-07-07 14:48:00	7.9	2.3
																																								RB2 Vitte oe.	2012-06-26 10:55:00	44.25	RB2 Vitte oe.	2012-07-30 13:25:00	1.42	RB2 Vitte oe.	2009-08-11 08:40:00	9.1	0.6
																																								RB2 Vitte oe.	2012-07-30 13:25:00	43.09	RB2 Vitte oe.	2012-08-29 13:45:00	1.57	RB2 Vitte oe.	2009-09-22 13:13:00	2.9	2.2
																																								RB2 Vitte oe.	2012-08-29 13:45:00	37.26	RB2 Vitte oe.	2012-09-26 11:05:00	1.19	RB2 Vitte oe.	2009-10-27 08:50:00	1.5	3.1
																																								RB2 Vitte oe.	2012-09-26 11:05:00	35.61	RB2 Vitte oe.	2012-10-29 11:00:00	1.86	RB2 Vitte oe.	2009-12-01 08:20:00	5.8	2.5
																																								RB2 Vitte oe.	2012-10-29 11:00:00	40.72	RB2 Vitte oe.	2012-11-27 10:30:00	0.55	RB2 Vitte oe.	2009-12-09 07:45:00	14.7	2.9
																																								RB2 Vitte oe.	2012-11-27 10:30:00	27.96	RB2 Vitte oe.	2012-12-12 10:10:00	0.96	RB2 Vitte oe.	2010-03-29 07:15:00	8.8	2.1
																																								RB2 Vitte oe.	2012-12-12 10:10:00	24.96	RB2 Vitte oe.	2013-02-26 14:20:00	0.8	RB2 Vitte oe.	2010-05-31 07:50:00	3.5	1.4
																																								RB2 Vitte oe.	2013-02-26 14:20:00	30.32	RB2 Vitte oe.	2013-04-23 16:00:00	1.77	RB2 Vitte oe.	2010-06-29 07:10:00	6.7	2.1
																																								RB2 Vitte oe.	2013-04-23 16:00:00	36.9	RB2 Vitte oe.	2013-05-28 08:55:00	0.9	RB2 Vitte oe.	2010-07-05 08:42:00	11.5	1.8
																																								RB2 Vitte oe.	2013-05-28 08:55:00	36.52	RB2 Vitte oe.	2013-06-11 15:50:00	0.96	RB2 Vitte oe.	2010-08-30 09:52:00	19	1.15
																																								RB2 Vitte oe.	2013-06-11 15:50:00	31.77	RB2 Vitte oe.	2013-07-23 15:00:00	1.1	RB2 Vitte oe.	2010-09-20 08:25:00	11.5	1.9
																																								RB2 Vitte oe.	2013-07-23 15:00:00	38.07	RB2 Vitte oe.	2013-08-20 15:10:00	0.85	RB2 Vitte oe.	2010-10-27 07:40:00	4.7	1.8
																																								RB2 Vitte oe.	2013-08-20 15:10:00	22.43	RB2 Vitte oe.	2013-09-24 16:15:00	0.74	RB2 Vitte oe.	2010-11-30 14:45:00	3.8	0.8
																																								RB2 Vitte oe.	2013-09-24 16:15:00	28.22	RB2 Vitte oe.	2013-10-22 16:25:00	0.78	RB2 Vitte oe.	2011-03-31 13:30:00	4.4	2.6
																																								RB2 Vitte oe.	2013-10-22 16:25:00	34.29	RB2 Vitte oe.	2013-11-19 16:15:00	0.73	RB2 Vitte oe.	2011-04-19 11:35:00	2.4	1.9
																																								RB2 Vitte oe.	2013-11-19 16:15:00	29.54	RB2 Vitte oe.	2013-12-10 15:45:00	0.94	RB2 Vitte oe.	2011-05-24 11:10:00	8.9	1
																																								RB2 Vitte oe.	2013-12-10 15:45:00	30.45	RB2 Vitte oe.	2014-01-21 16:15:00	1.91	RB2 Vitte oe.	2011-06-22 11:00:00	7.1	1.1
																																								RB2 Vitte oe.	2014-01-21 16:15:00	63.1	RB2 Vitte oe.	2014-03-25 15:20:00	0.78	RB2 Vitte oe.	2011-07-27 10:25:00	10.8	1.4
																																								RB2 Vitte oe.	2014-03-25 15:20:00	34.28	RB2 Vitte oe.	2014-05-20 17:15:00	0.88	RB2 Vitte oe.	2011-08-31 11:30:00	26.2	0.6
																																								RB2 Vitte oe.	2014-05-20 17:15:00	32.97	RB2 Vitte oe.	2014-06-10 16:30:00	1.81	RB2 Vitte oe.	2011-09-27 13:25:00	8.4	1.2
																																								RB2 Vitte oe.	2014-06-10 16:30:00	47.16	RB2 Vitte oe.	2014-07-29 16:50:00	1.13	RB2 Vitte oe.	2011-11-08 14:40:00	3.6	1.5
																																								RB2 Vitte oe.	2014-07-29 16:50:00	30.19	RB2 Vitte oe.	2014-08-27 14:40:00	1.29	RB2 Vitte oe.	2011-11-30 10:55:00	19.5	1.5
																																								RB2 Vitte oe.	2014-08-27 14:40:00	45.56	RB2 Vitte oe.	2014-09-24 16:45:00	1.84	RB2 Vitte oe.	2011-12-12 12:30:00	15.9	0.8
																																								RB2 Vitte oe.	2014-09-24 16:45:00	34.68	RB2 Vitte oe.	2014-10-15 16:55:00	0.74	RB2 Vitte oe.	2012-01-16 15:35:00	4.2	2.2
																																								RB2 Vitte oe.	2014-10-15 16:55:00	35.22	RB2 Vitte oe.	2014-11-25 16:20:00	1.19	RB2 Vitte oe.	2012-03-06 10:50:00	4.8	2
																																								RB2 Vitte oe.	2014-11-25 16:20:00	41.66	RB2 Vitte oe.	2014-12-17 11:10:00	1.27	RB2 Vitte oe.	2012-03-27 10:00:00	7.1	4
																																								RB2 Vitte oe.	2014-12-17 11:10:00	44.55	RB2 Vitte oe.	2015-01-13 16:10:00	1.62	RB2 Vitte oe.	2012-04-23 12:35:00	3.9	2.8
																																								RB2 Vitte oe.	2015-01-13 16:10:00	43.33	RB2 Vitte oe.	2015-02-26 15:35:00	0.91	RB2 Vitte oe.	2012-05-29 11:47:00	6.4	1.3
																																								RB2 Vitte oe.	2015-02-26 15:35:00	81	RB2 Vitte oe.	2015-03-16 15:30:00	2.17	RB2 Vitte oe.	2012-06-26 10:55:00	13	0.7
																																								RB2 Vitte oe.	2015-03-16 15:30:00	72.3	RB2 Vitte oe.	2015-04-27 13:25:00	0.42	RB2 Vitte oe.	2012-07-30 13:25:00	7.9	1.7
																																								RB2 Vitte oe.	2015-04-27 13:25:00	14.48	RB2 Vitte oe.	2015-05-18 14:00:00	0.61	RB2 Vitte oe.	2012-08-29 13:45:00	5.1	2.2
																																								RB2 Vitte oe.	2015-05-18 14:00:00	24.35	RB2 Vitte oe.	2015-06-15 13:00:00	1.13	RB2 Vitte oe.	2012-09-26 11:05:00	3	3.6
																																								RB2 Vitte oe.	2015-06-15 13:00:00	34.54	RB2 Vitte oe.	2015-07-13 12:30:00	1.32	RB2 Vitte oe.	2012-10-29 11:00:00	2	2.5
																																								RB2 Vitte oe.	2015-07-13 12:30:00	37.18	RB2 Vitte oe.	2015-08-24 12:35:00	1.33	RB2 Vitte oe.	2012-11-27 10:30:00	4.5	3
																																								RB2 Vitte oe.	2015-08-24 12:35:00	47.52	RB2 Vitte oe.	2015-09-07 12:55:00	0.85	RB2 Vitte oe.	2012-12-12 10:10:00	1.6	3
																																								RB2 Vitte oe.	2015-09-07 12:55:00	24.07	RB2 Vitte oe.	2015-10-12 12:00:00	0.64	RB2 Vitte oe.	2013-02-26 14:20:00	4.4	2
																																								RB2 Vitte oe.	2015-10-12 12:00:00	33.37	RB2 Vitte oe.	2015-11-16 12:45:00	0.85	RB2 Vitte oe.	2013-04-23 16:00:00	4.1	2.4
																																								RB2 Vitte oe.	2015-11-16 12:45:00	30.74	RB2 Vitte oe.	2015-12-07 11:40:00	0.84	RB2 Vitte oe.	2013-05-28 08:55:00	4.4	2.2
																																								RB2 Vitte oe.	2015-12-07 11:40:00	31.51	RB2 Vitte oe.	2016-02-22 11:15:00	1.07	RB2 Vitte oe.	2013-06-11 15:50:00	2.3	2.5
																																								RB2 Vitte oe.	2016-02-22 11:15:00	56.51	RB2 Vitte oe.	2016-03-21 13:00:00	0.58	RB2 Vitte oe.	2013-07-23 15:00:00	8.4	3.5
																																								RB2 Vitte oe.	2016-03-21 13:00:00	31.03	RB2 Vitte oe.	2016-04-18 13:00:00	0.91	RB2 Vitte oe.	2013-08-20 15:10:00	5.3	2.3
																																								RB2 Vitte oe.	2016-04-18 13:00:00	38.05	RB2 Vitte oe.	2016-05-17 11:30:00	0.76	RB2 Vitte oe.	2013-09-24 16:15:00	3.3	2.3
																																								RB2 Vitte oe.	2016-05-17 11:30:00	24.79	RB2 Vitte oe.	2016-06-20 12:05:00	1.32	RB2 Vitte oe.	2013-10-22 16:25:00	4.6	3
																																								RB2 Vitte oe.	2016-06-20 12:05:00	47.33	RB2 Vitte oe.	2016-07-18 09:15:00	1.65	RB2 Vitte oe.	2013-11-19 16:15:00	8.5	2.3
																																								RB2 Vitte oe.	2016-07-18 09:15:00	37.84	RB2 Vitte oe.	2016-08-15 10:25:00	0.71	RB2 Vitte oe.	2013-12-10 15:45:00	4.5	1.4
																																								RB2 Vitte oe.	2016-08-15 10:25:00	25.73	RB2 Vitte oe.	2016-09-26 12:30:00	1.26	RB2 Vitte oe.	2014-01-21 16:15:00	10.6	1
																																								RB2 Vitte oe.	2016-09-26 12:30:00	41.08	RB2 Vitte oe.	2016-10-24 12:10:00	2.33	RB2 Vitte oe.	2014-03-25 15:20:00	3.8	3.2
																																								RB2 Vitte oe.	2016-10-24 12:10:00	43.82	RB2 Vitte oe.	2016-11-21 14:00:00	0.57	RB2 Vitte oe.	2014-05-20 17:15:00	3.6	3
																																								RB2 Vitte oe.	2016-11-21 14:00:00	25.89	RB2 Vitte oe.	2016-12-12 13:15:00	0.88	RB2 Vitte oe.	2014-06-10 16:30:00	8.9	1.3
																																								RB2 Vitte oe.	2016-12-12 13:15:00	23.84	RB2 Vitte oe.	2017-01-23 12:35:00	0.66	RB2 Vitte oe.	2014-07-29 16:50:00	5.1	1.8
																																								RB2 Vitte oe.	2017-01-23 12:35:00	26.45	RB2 Vitte oe.	2017-02-27 13:30:00	0.64	RB2 Vitte oe.	2014-08-27 14:40:00	9.8	2.6
																																								RB2 Vitte oe.	2017-02-27 13:30:00	30.79	RB2 Vitte oe.	2017-03-20 11:55:00	1.09	RB2 Vitte oe.	2014-09-24 16:45:00	8.1	1.6
																																								RB2 Vitte oe.	2017-03-20 11:55:00	28.49	RB2 Vitte oe.	2017-04-24 10:55:00	1.49	RB2 Vitte oe.	2014-10-15 16:55:00	3.6	3
																																								RB2 Vitte oe.	2017-04-24 10:55:00	42.9	RB2 Vitte oe.	2017-05-22 09:00:00	0.85	RB2 Vitte oe.	2014-11-25 16:20:00	5.5	1.9
																																								RB2 Vitte oe.	2017-05-22 09:00:00	34.88	RB2 Vitte oe.	2017-07-24 09:15:00	1.37	RB2 Vitte oe.	2014-12-17 11:10:00	7.9	1.3
																																								RB2 Vitte oe.	2017-07-24 09:15:00	42.16	RB2 Vitte oe.	2017-08-28 12:00:00	1.15	RB2 Vitte oe.	2015-01-13 16:10:00	6.2	1
																																								RB2 Vitte oe.	2017-08-28 12:00:00	38.78	RB2 Vitte oe.	2017-09-25 10:00:00	0.68	RB2 Vitte oe.	2015-02-26 15:35:00	8.9	2
																																								RB2 Vitte oe.	2017-09-25 10:00:00	33.29	RB2 Vitte oe.	2017-10-23 10:45:00	1.45	RB2 Vitte oe.	2015-03-16 15:30:00	2.5	2
																																								RB2 Vitte oe.	2017-10-23 10:45:00	42.21	RB2 Vitte oe.	2017-11-27 09:00:00	1.33	RB2 Vitte oe.	2015-04-27 13:25:00	1.2	4
																																								RB2 Vitte oe.	2017-11-27 09:00:00	41.29	RB2 Vitte oe.	2017-12-11 10:00:00	0.77	RB2 Vitte oe.	2015-05-18 14:00:00	1.4	3
																																								RB2 Vitte oe.	2017-12-11 10:00:00	44.59	RB2 Vitte oe.	2018-01-29 10:40:00	2.26	RB2 Vitte oe.	2015-06-15 13:00:00	5.9	1.8
																																								RB2 Vitte oe.	2018-01-29 10:40:00	98.77	RB2 Vitte oe.	2018-02-26 10:45:00	0.44	RB2 Vitte oe.	2015-07-13 12:30:00	8.9	1.9
																																								RB2 Vitte oe.	2018-02-26 10:45:00	85.97	RB2 Vitte oe.	2018-03-27 09:55:00	1.33	RB2 Vitte oe.	2015-08-24 12:35:00	2.1	1.8
																																								RB2 Vitte oe.	2018-03-27 09:55:00	214.35	RB2 Vitte oe.	2018-04-24 10:20:00	2.03	RB2 Vitte oe.	2015-09-07 12:55:00	2	2
																																								RB2 Vitte oe.	2018-04-24 10:20:00	65.8	RB2 Vitte oe.	2018-05-28 12:10:00	2.84	RB2 Vitte oe.	2015-10-12 12:00:00	0.6	2.6
																																								RB2 Vitte oe.	2018-05-28 12:10:00	74.73	RB2 Vitte oe.	2018-06-25 14:50:00	1.08	RB2 Vitte oe.	2015-11-16 12:45:00	3.9	2.2
																																								RB2 Vitte oe.	2018-06-25 14:50:00	37.8	RB2 Vitte oe.	2018-07-23 12:20:00	1.58	RB2 Vitte oe.	2015-12-07 11:40:00	3.4	1.9
																																								RB2 Vitte oe.	2018-07-23 12:20:00	46.23	RB2 Vitte oe.	2018-08-27 12:40:00	1	RB2 Vitte oe.	2016-02-22 11:15:00	10.4	0.7
																																								RB2 Vitte oe.	2018-08-27 12:40:00	49.2	RB2 Vitte oe.	2018-10-22 13:20:00	0.99	RB2 Vitte oe.	2016-03-21 13:00:00	0.9	2.5
																																								RB2 Vitte oe.	2018-10-22 13:20:00	33.45	RB2 Vitte oe.	2018-11-19 12:05:00	1.62	RB2 Vitte oe.	2016-04-18 13:00:00	0.9	2
																																								RB2 Vitte oe.	2018-11-19 12:05:00	36.57	RB2 Vitte oe.	2018-12-04 08:35:00	1.7	RB2 Vitte oe.	2016-05-17 11:30:00	1.3	2.4
																																								RB2 Vitte oe.	2018-12-04 08:35:00	45.52				RB2 Vitte oe.	2016-06-20 12:05:00	3.6	1.9
																																														RB2 Vitte oe.	2016-07-18 09:15:00	2.7	1.9
																																														RB2 Vitte oe.	2016-08-15 10:25:00	1.4	3.2
																																														RB2 Vitte oe.	2016-09-26 12:30:00	3.5	4.9
																																														RB2 Vitte oe.	2016-10-24 12:10:00	0.7	3.2
																																														RB2 Vitte oe.	2016-11-21 14:00:00	0.5	3
																																														RB2 Vitte oe.	2016-12-12 13:15:00	6.2	2.9
																																														RB2 Vitte oe.	2017-01-23 12:35:00	1.2	1.9
																																														RB2 Vitte oe.	2017-02-27 13:30:00	1.5	0.9
																																														RB2 Vitte oe.	2017-03-20 11:55:00	1.2	2.8
																																														RB2 Vitte oe.	2017-04-24 10:55:00	14.8	2.1
																																														RB2 Vitte oe.	2017-05-22 09:00:00	4	3.5
																																														RB2 Vitte oe.	2017-07-24 09:15:00	8.6	1.4
																																														RB2 Vitte oe.	2017-08-28 12:00:00	2	2.3
																																														RB2 Vitte oe.	2017-09-25 10:00:00	1.6	3
																																														RB2 Vitte oe.	2017-10-23 10:45:00	4.1	2.3
																																														RB2 Vitte oe.	2017-11-27 09:00:00	5.7	2.2
																																														RB2 Vitte oe.	2017-12-11 10:00:00	5.2	1.7
																																														RB2 Vitte oe.	2018-01-29 10:40:00	24.1	0.8
																																														RB2 Vitte oe.	2018-02-26 10:45:00	4.3	1
																																														RB2 Vitte oe.	2018-03-27 09:55:00	6.7	1.4
																																														RB2 Vitte oe.	2018-04-24 10:20:00	23.2	1.4
																																														RB2 Vitte oe.	2018-05-28 12:10:00	8.8	1
																																														RB2 Vitte oe.	2018-06-25 14:50:00	3.8	1.2
																																														RB2 Vitte oe.	2018-07-23 12:20:00	2	1.3
																																														RB2 Vitte oe.	2018-08-27 12:40:00	5.9	1.8
																																														RB2 Vitte oe.	2018-10-22 13:20:00	1.9	2.3
																																														RB2 Vitte oe.	2018-11-19 12:05:00	5.2	2.4
																																														RB2 Vitte oe.	2018-12-04 08:35:00	4.3	2.2
[truncated: 40 more columns]

## Sheet: DIN & DIP
Station	Date	Paramter	Value [µmol l-1]		Station	Date	Paramter	Value [µmol l-1]		Station	Date	Paramter	Value [µmol l-1]		Station	Date	Paramter	Value [µmol l-1]		Station	Date	Paramter	Value [µmol l-1]		Station	Date	Paramter	Value [µmol l-1]		Station	Date	Paramter	Value [µmol l-1]		Station	Date	Paramter	Value [µmol l-1]		Station	Date	Paramter	Value [µmol l-1]
WB3 Walfisch n.	2010-03-18 08:15:00	NH4-N	0.6		SH2 Tessmannsdorf nw.	2010-03-23 09:40:00	NH4-N	3.96		UW4 Warnowwerft	2010-03-16 08:33:00	NH4-N	9.03		DB2 Sundische Wiese	40259.4	NH4-N	28.45		KB90 Fahrwasser I.Libitz w.	40274.4	NH4-N	0.6		S66 Stralsund	2010-04-19 08:41:00	NH4-N	0.6		GB10 Ruden s.	2010-04-21 15:05:00	NH4-N	0.6		RB15 Buschvitz oe.	2010-03-25 08:00:00	NH4-N	36.18		RB10 Lietzow n.	2010-04-07 09:58:41	NH4-N	0.6
WB3 Walfisch n.	2010-03-18 08:15:00	NO2-N	0.62		SH2 Tessmannsdorf nw.	2010-03-23 09:40:00	NO2-N	3.13		UW4 Warnowwerft	2010-03-16 08:33:00	NO2-N	2.17		DB2 Sundische Wiese	40259.4	NO2-N	0.89		KB90 Fahrwasser I.Libitz w.	40274.4	NO2-N	0.37		S66 Stralsund	2010-04-19 08:41:00	NO2-N	0.31		GB10 Ruden s.	2010-04-21 15:05:00	NO2-N	0.26		RB15 Buschvitz oe.	2010-03-25 08:00:00	NO2-N	0.63		RB10 Lietzow n.	2010-04-07 09:58:41	NO2-N	0.2
WB3 Walfisch n.	2010-03-18 08:15:00	NO3-N	36.84		SH2 Tessmannsdorf nw.	2010-03-23 09:40:00	NO3-N	418		UW4 Warnowwerft	2010-03-16 08:33:00	NO3-N	258		DB2 Sundische Wiese	40259.4	NO3-N	133		KB90 Fahrwasser I.Libitz w.	40274.4	NO3-N	17.92		S66 Stralsund	2010-04-19 08:41:00	NO3-N	12.22		GB10 Ruden s.	2010-04-21 15:05:00	NO3-N	14.8		RB15 Buschvitz oe.	2010-03-25 08:00:00	NO3-N	31.29		RB10 Lietzow n.	2010-04-07 09:58:41	NO3-N	12.82
WB3 Walfisch n.	2010-03-18 08:15:00	O-PO4-P	0.11		SH2 Tessmannsdorf nw.	2010-03-23 09:40:00	O-PO4-P	0.06		UW4 Warnowwerft	2010-03-16 08:33:00	O-PO4-P	0.75		DB2 Sundische Wiese	40259.4	O-PO4-P	0.14		KB90 Fahrwasser I.Libitz w.	40274.4	O-PO4-P	0.05		S66 Stralsund	2010-04-19 08:41:00	O-PO4-P	0.05		GB10 Ruden s.	2010-04-21 15:05:00	O-PO4-P	0.05		RB15 Buschvitz oe.	2010-03-25 08:00:00	O-PO4-P	0.11		RB10 Lietzow n.	2010-04-07 09:58:41	O-PO4-P	0.05
WB3 Walfisch n.	2010-04-15 07:29:00	NH4-N	0.6		SH2 Tessmannsdorf nw.	2010-04-14 09:31:00	NH4-N	0.6		UW4 Warnowwerft	2010-04-13 10:59:00	NH4-N	0.6		DB2 Sundische Wiese	40294.4	NH4-N	0.6		KB90 Fahrwasser I.Libitz w.	40343.4	NH4-N	0.6		S66 Stralsund	2010-05-03 08:43:00	NH4-N	0.6		GB10 Ruden s.	2010-05-04 08:08:00	NH4-N	0.6		RB15 Buschvitz oe.	2010-04-26 09:30:00	NH4-N	0.6		RB10 Lietzow n.	2010-06-30 09:43:00	NH4-N	0.6
WB3 Walfisch n.	2010-04-15 07:29:00	NO2-N	0.02		SH2 Tessmannsdorf nw.	2010-04-14 09:31:00	NO2-N	1.54		UW4 Warnowwerft	2010-04-13 10:59:00	NO2-N	0.81		DB2 Sundische Wiese	40294.4	NO2-N	1.98		KB90 Fahrwasser I.Libitz w.	40343.4	NO2-N	0.04		S66 Stralsund	2010-05-03 08:43:00	NO2-N	0.1		GB10 Ruden s.	2010-05-04 08:08:00	NO2-N	0.55		RB15 Buschvitz oe.	2010-04-26 09:30:00	NO2-N	0.66		RB10 Lietzow n.	2010-06-30 09:43:00	NO2-N	0.03
WB3 Walfisch n.	2010-04-15 07:29:00	NO3-N	0.88		SH2 Tessmannsdorf nw.	2010-04-14 09:31:00	NO3-N	107		UW4 Warnowwerft	2010-04-13 10:59:00	NO3-N	87.01		DB2 Sundische Wiese	40294.4	NO3-N	32.04		KB90 Fahrwasser I.Libitz w.	40343.4	NO3-N	0.22		S66 Stralsund	2010-05-03 08:43:00	NO3-N	0.22		GB10 Ruden s.	2010-05-04 08:08:00	NO3-N	10.34		RB15 Buschvitz oe.	2010-04-26 09:30:00	NO3-N	1.2		RB10 Lietzow n.	2010-06-30 09:43:00	NO3-N	0.22
WB3 Walfisch n.	2010-04-15 07:29:00	O-PO4-P	0.05		SH2 Tessmannsdorf nw.	2010-04-14 09:31:00	O-PO4-P	0.05		UW4 Warnowwerft	2010-04-13 10:59:00	O-PO4-P	0.12		DB2 Sundische Wiese	40294.4	O-PO4-P	0.05		KB90 Fahrwasser I.Libitz w.	40343.4	O-PO4-P	0.1		S66 Stralsund	2010-05-03 08:43:00	O-PO4-P	0.07		GB10 Ruden s.	2010-05-04 08:08:00	O-PO4-P	0.18		RB15 Buschvitz oe.	2010-04-26 09:30:00	O-PO4-P	0.1		RB10 Lietzow n.	2010-06-30 09:43:00	O-PO4-P	0.07
WB3 Walfisch n.	2010-05-20 08:34:00	NH4-N	0.6		SH2 Tessmannsdorf nw.	2010-05-19 08:12:00	NH4-N	0.92		UW4 Warnowwerft	2010-05-19 09:47:00	NH4-N	0.6		DB2 Sundische Wiese	40324.4	NH4-N	0.6		KB90 Fahrwasser I.Libitz w.	40371.3	NH4-N	0.76		S66 Stralsund	2010-06-07 08:47:00	NH4-N	0.88		GB10 Ruden s.	2010-06-08 08:12:00	NH4-N	2.34		RB15 Buschvitz oe.	2010-05-17 08:50:00	NH4-N	0.6		RB10 Lietzow n.	2010-08-10 11:40:00	NH4-N	0.6
WB3 Walfisch n.	2010-05-20 08:34:00	NO2-N	0.02		SH2 Tessmannsdorf nw.	2010-05-19 08:12:00	NO2-N	0.12		UW4 Warnowwerft	2010-05-19 09:47:00	NO2-N	0.28		DB2 Sundische Wiese	40324.4	NO2-N	0.07		KB90 Fahrwasser I.Libitz w.	40371.3	NO2-N	0.02		S66 Stralsund	2010-06-07 08:47:00	NO2-N	0.15		GB10 Ruden s.	2010-06-08 08:12:00	NO2-N	0.89		RB15 Buschvitz oe.	2010-05-17 08:50:00	NO2-N	0.1		RB10 Lietzow n.	2010-08-10 11:40:00	NO2-N	0.02
WB3 Walfisch n.	2010-05-20 08:34:00	NO3-N	0.22		SH2 Tessmannsdorf nw.	2010-05-19 08:12:00	NO3-N	0.68		UW4 Warnowwerft	2010-05-19 09:47:00	NO3-N	5.45		DB2 Sundische Wiese	40324.4	NO3-N	0.22		KB90 Fahrwasser I.Libitz w.	40371.3	NO3-N	0.22		S66 Stralsund	2010-06-07 08:47:00	NO3-N	0.22		GB10 Ruden s.	2010-06-08 08:12:00	NO3-N	19.73		RB15 Buschvitz oe.	2010-05-17 08:50:00	NO3-N	0.22		RB10 Lietzow n.	2010-08-10 11:40:00	NO3-N	0.22
WB3 Walfisch n.	2010-05-20 08:34:00	O-PO4-P	0.1		SH2 Tessmannsdorf nw.	2010-05-19 08:12:00	O-PO4-P	0.16		UW4 Warnowwerft	2010-05-19 09:47:00	O-PO4-P	0.21		DB2 Sundische Wiese	40324.4	O-PO4-P	0.11		KB90 Fahrwasser I.Libitz w.	40371.3	O-PO4-P	0.53		S66 Stralsund	2010-06-07 08:47:00	O-PO4-P	0.05		GB10 Ruden s.	2010-06-08 08:12:00	O-PO4-P	0.05		RB15 Buschvitz oe.	2010-05-17 08:50:00	O-PO4-P	0.11		RB10 Lietzow n.	2010-08-10 11:40:00	O-PO4-P	0.391
WB3 Walfisch n.	2010-06-16 08:16:00	NH4-N	0.6		SH2 Tessmannsdorf nw.	2010-06-16 08:55:00	NH4-N	0.6		UW4 Warnowwerft	2010-06-15 09:55:00	NH4-N	0.79		DB2 Sundische Wiese	40353.4	NH4-N	0.6		KB90 Fahrwasser I.Libitz w.	40399.4	NH4-N	0.6		S66 Stralsund	2010-08-02 08:42:00	NH4-N	0.6		GB10 Ruden s.	2010-08-03 08:07:00	NH4-N	0.6		RB15 Buschvitz oe.	2010-06-21 09:00:00	NH4-N	2.53		RB10 Lietzow n.	2011-03-15 09:50:29	NH4-N	5.863
WB3 Walfisch n.	2010-06-16 08:16:00	NO2-N	0.04		SH2 Tessmannsdorf nw.	2010-06-16 08:55:00	NO2-N	0.04		UW4 Warnowwerft	2010-06-15 09:55:00	NO2-N	0.39		DB2 Sundische Wiese	40353.4	NO2-N	0.06		KB90 Fahrwasser I.Libitz w.	40399.4	NO2-N	0.02		S66 Stralsund	2010-08-02 08:42:00	NO2-N	0.02		GB10 Ruden s.	2010-08-03 08:07:00	NO2-N	0.02		RB15 Buschvitz oe.	2010-06-21 09:00:00	NO2-N	0.07		RB10 Lietzow n.	2011-03-15 09:50:29	NO2-N	1.084
WB3 Walfisch n.	2010-06-16 08:16:00	NO3-N	0.22		SH2 Tessmannsdorf nw.	2010-06-16 08:55:00	NO3-N	0.22		UW4 Warnowwerft	2010-06-15 09:55:00	NO3-N	2.84		DB2 Sundische Wiese	40353.4	NO3-N	0.22		KB90 Fahrwasser I.Libitz w.	40399.4	NO3-N	0.22		S66 Stralsund	2010-08-02 08:42:00	NO3-N	0.295		GB10 Ruden s.	2010-08-03 08:07:00	NO3-N	0.22		RB15 Buschvitz oe.	2010-06-21 09:00:00	NO3-N	0.22		RB10 Lietzow n.	2011-03-15 09:50:29	NO3-N	26.724
WB3 Walfisch n.	2010-06-16 08:16:00	O-PO4-P	0.3		SH2 Tessmannsdorf nw.	2010-06-16 08:55:00	O-PO4-P	0.59		UW4 Warnowwerft	2010-06-15 09:55:00	O-PO4-P	0.21		DB2 Sundische Wiese	40353.4	O-PO4-P	0.32		KB90 Fahrwasser I.Libitz w.	40399.4	O-PO4-P	0.29		S66 Stralsund	2010-08-02 08:42:00	O-PO4-P	0.25		GB10 Ruden s.	2010-08-03 08:07:00	O-PO4-P	2.43		RB15 Buschvitz oe.	2010-06-21 09:00:00	O-PO4-P	0.14		RB10 Lietzow n.	2011-03-15 09:50:29	O-PO4-P	0.155
WB3 Walfisch n.	2010-07-14 08:22:00	NH4-N	0.6		SH2 Tessmannsdorf nw.	2010-07-14 10:20:00	NH4-N	1.36		UW4 Warnowwerft	2010-07-13 09:36:00	NH4-N	1.39		DB2 Sundische Wiese	40372.4	NH4-N	0.6		KB90 Fahrwasser I.Libitz w.	40472.6	NH4-N	0.6		S66 Stralsund	2010-10-04 08:44:17	NH4-N	0.6		GB10 Ruden s.	2010-10-04 14:54:00	NH4-N	2.876		RB15 Buschvitz oe.	2010-07-08 09:10:00	NH4-N	1.31		RB10 Lietzow n.	2011-04-19 10:04:34	NH4-N	0.6
WB3 Walfisch n.	2010-07-14 08:22:00	NO2-N	0.02		SH2 Tessmannsdorf nw.	2010-07-14 10:20:00	NO2-N	0.1		UW4 Warnowwerft	2010-07-13 09:36:00	NO2-N	0.02		DB2 Sundische Wiese	40372.4	NO2-N	0.02		KB90 Fahrwasser I.Libitz w.	40472.6	NO2-N	0.02		S66 Stralsund	2010-10-04 08:44:17	NO2-N	0.028		GB10 Ruden s.	2010-10-04 14:54:00	NO2-N	0.595		RB15 Buschvitz oe.	2010-07-08 09:10:00	NO2-N	0.02		RB10 Lietzow n.	2011-04-19 10:04:34	NO2-N	0.54
WB3 Walfisch n.	2010-07-14 08:22:00	NO3-N	0.22		SH2 Tessmannsdorf nw.	2010-07-14 10:20:00	NO3-N	0.33		UW4 Warnowwerft	2010-07-13 09:36:00	NO3-N	0.34		DB2 Sundische Wiese	40372.4	NO3-N	0.22		KB90 Fahrwasser I.Libitz w.	40472.6	NO3-N	0.22		S66 Stralsund	2010-10-04 08:44:17	NO3-N	0.22		GB10 Ruden s.	2010-10-04 14:54:00	NO3-N	6.903		RB15 Buschvitz oe.	2010-07-08 09:10:00	NO3-N	0.22		RB10 Lietzow n.	2011-04-19 10:04:34	NO3-N	10.841
WB3 Walfisch n.	2010-07-14 08:22:00	O-PO4-P	0.73		SH2 Tessmannsdorf nw.	2010-07-14 10:20:00	O-PO4-P	2.46		UW4 Warnowwerft	2010-07-13 09:36:00	O-PO4-P	0.73		DB2 Sundische Wiese	40372.4	O-PO4-P	0.11		KB90 Fahrwasser I.Libitz w.	40472.6	O-PO4-P	0.057		S66 Stralsund	2010-10-04 08:44:17	O-PO4-P	0.536		GB10 Ruden s.	2010-10-04 14:54:00	O-PO4-P	0.586		RB15 Buschvitz oe.	2010-07-08 09:10:00	O-PO4-P	0.11		RB10 Lietzow n.	2011-04-19 10:04:34	O-PO4-P	0.05
WB3 Walfisch n.	2010-08-19 09:04:00	NH4-N	0.6		SH2 Tessmannsdorf nw.	2010-08-18 10:29:00	NH4-N	15.75		UW4 Warnowwerft	2010-08-17 10:50:00	NH4-N	1.905		DB2 Sundische Wiese	40406.5	NH4-N	0.6		KB90 Fahrwasser I.Libitz w.	40497.4	NH4-N	2.396		S66 Stralsund	2010-11-22 08:39:31	NH4-N	0.6		GB10 Ruden s.	2010-11-23 08:15:13	NH4-N	1.842		RB15 Buschvitz oe.	2010-08-26 08:00:00	NH4-N	0.6		RB10 Lietzow n.	2011-05-17 10:23:31	NH4-N	0.6
WB3 Walfisch n.	2010-08-19 09:04:00	NO2-N	0.02		SH2 Tessmannsdorf nw.	2010-08-18 10:29:00	NO2-N	0.02		UW4 Warnowwerft	2010-08-17 10:50:00	NO2-N	0.02		DB2 Sundische Wiese	40406.5	NO2-N	0.02		KB90 Fahrwasser I.Libitz w.	40497.4	NO2-N	0.452		S66 Stralsund	2010-11-22 08:39:31	NO2-N	0.175		GB10 Ruden s.	2010-11-23 08:15:13	NO2-N	0.291		RB15 Buschvitz oe.	2010-08-26 08:00:00	NO2-N	0.122		RB10 Lietzow n.	2011-05-17 10:23:31	NO2-N	0.02
WB3 Walfisch n.	2010-08-19 09:04:00	NO3-N	0.383		SH2 Tessmannsdorf nw.	2010-08-18 10:29:00	NO3-N	0.329		UW4 Warnowwerft	2010-08-17 10:50:00	NO3-N	1.714		DB2 Sundische Wiese	40406.5	NO3-N	0.22		KB90 Fahrwasser I.Libitz w.	40497.4	NO3-N	17.688		S66 Stralsund	2010-11-22 08:39:31	NO3-N	6.411		GB10 Ruden s.	2010-11-23 08:15:13	NO3-N	8.561		RB15 Buschvitz oe.	2010-08-26 08:00:00	NO3-N	0.22		RB10 Lietzow n.	2011-05-17 10:23:31	NO3-N	0.22
WB3 Walfisch n.	2010-08-19 09:04:00	O-PO4-P	1.063		SH2 Tessmannsdorf nw.	2010-08-18 10:29:00	O-PO4-P	3.095		UW4 Warnowwerft	2010-08-17 10:50:00	O-PO4-P	0.782		DB2 Sundische Wiese	40406.5	O-PO4-P	0.083		KB90 Fahrwasser I.Libitz w.	40497.4	O-PO4-P	0.085		S66 Stralsund	2010-11-22 08:39:31	O-PO4-P	0.375		GB10 Ruden s.	2010-11-23 08:15:13	O-PO4-P	0.502		RB15 Buschvitz oe.	2010-08-26 08:00:00	O-PO4-P	0.088		RB10 Lietzow n.	2011-05-17 10:23:31	O-PO4-P	0.05
WB3 Walfisch n.	2010-10-20 08:22:05	NH4-N	0.6		SH2 Tessmannsdorf nw.	2010-09-13 08:17:00	NH4-N	2.348		UW4 Warnowwerft	2010-11-16 11:43:54	NH4-N	7.376		DB2 Sundische Wiese	40434.4	NH4-N	0.6		KB90 Fahrwasser I.Libitz w.	40618.5	NH4-N	0.6		S66 Stralsund	2011-03-21 08:38:41	NH4-N	0.6		GB10 Ruden s.	2011-03-21 14:43:38	NH4-N	0.6		RB15 Buschvitz oe.	2010-09-20 09:00:00	NH4-N	0.6		RB10 Lietzow n.	2011-07-06 09:31:47	NH4-N	0.6
WB3 Walfisch n.	2010-10-20 08:22:05	NO2-N	0.017		SH2 Tessmannsdorf nw.	2010-09-13 08:17:00	NO2-N	0.034		UW4 Warnowwerft	2010-11-16 11:43:54	NO2-N	1.796		DB2 Sundische Wiese	40434.4	NO2-N	0.02		KB90 Fahrwasser I.Libitz w.	40618.5	NO2-N	0.681		S66 Stralsund	2011-03-21 08:38:41	NO2-N	0.659		GB10 Ruden s.	2011-03-21 14:43:38	NO2-N	0.98		RB15 Buschvitz oe.	2010-09-20 09:00:00	NO2-N	0.02		RB10 Lietzow n.	2011-07-06 09:31:47	NO2-N	0.038
WB3 Walfisch n.	2010-10-20 08:22:05	NO3-N	0.22		SH2 Tessmannsdorf nw.	2010-09-13 08:17:00	NO3-N	0.559		UW4 Warnowwerft	2010-11-16 11:43:54	NO3-N	139.8		DB2 Sundische Wiese	40434.4	NO3-N	0.22		KB90 Fahrwasser I.Libitz w.	40618.5	NO3-N	35.89		S66 Stralsund	2011-03-21 08:38:41	NO3-N	34.822		GB10 Ruden s.	2011-03-21 14:43:38	NO3-N	133.73		RB15 Buschvitz oe.	2010-09-20 09:00:00	NO3-N	0.22		RB10 Lietzow n.	2011-07-06 09:31:47	NO3-N	0.22
WB3 Walfisch n.	2010-10-20 08:22:05	O-PO4-P	0.154		SH2 Tessmannsdorf nw.	2010-09-13 08:17:00	O-PO4-P	0.178		UW4 Warnowwerft	2010-11-16 11:43:54	O-PO4-P	1.268		DB2 Sundische Wiese	40434.4	O-PO4-P	0.05		KB90 Fahrwasser I.Libitz w.	40618.5	O-PO4-P	0.106		S66 Stralsund	2011-03-21 08:38:41	O-PO4-P	0.143		GB10 Ruden s.	2011-03-21 14:43:38	O-PO4-P	0.23		RB15 Buschvitz oe.	2010-09-20 09:00:00	O-PO4-P	0.077		RB10 Lietzow n.	2011-07-06 09:31:47	O-PO4-P	0.167
WB3 Walfisch n.	2010-11-17 10:13:14	NH4-N	2.47		SH2 Tessmannsdorf nw.	2010-10-19 07:35:00	NH4-N	0.6		UW4 Warnowwerft	2011-03-09 08:31:25	NH4-N	1.713		DB2 Sundische Wiese	40462.4	NH4-N	0.6		KB90 Fahrwasser I.Libitz w.	40651.4	NH4-N	0.6		S66 Stralsund	2011-04-11 08:37:50	NH4-N	0.6		GB10 Ruden s.	2011-04-11 15:33:59	NH4-N	0.6		RB15 Buschvitz oe.	2010-10-25 09:00:00	NH4-N	1.374		RB10 Lietzow n.	2011-08-02 09:50:05	NH4-N	0.6
WB3 Walfisch n.	2010-11-17 10:13:14	NO2-N	0.417		SH2 Tessmannsdorf nw.	2010-10-19 07:35:00	NO2-N	0.02		UW4 Warnowwerft	2011-03-09 08:31:25	NO2-N	0.843		DB2 Sundische Wiese	40462.4	NO2-N	0.036		KB90 Fahrwasser I.Libitz w.	40651.4	NO2-N	0.088		S66 Stralsund	2011-04-11 08:37:50	NO2-N	0.296		GB10 Ruden s.	2011-04-11 15:33:59	NO2-N	0.489		RB15 Buschvitz oe.	2010-10-25 09:00:00	NO2-N	0.195		RB10 Lietzow n.	2011-08-02 09:50:05	NO2-N	0.02
WB3 Walfisch n.	2010-11-17 10:13:14	NO3-N	10.499		SH2 Tessmannsdorf nw.	2010-10-19 07:35:00	NO3-N	0.22		UW4 Warnowwerft	2011-03-09 08:31:25	NO3-N	65.71		DB2 Sundische Wiese	40462.4	NO3-N	0.22		KB90 Fahrwasser I.Libitz w.	40651.4	NO3-N	1.521		S66 Stralsund	2011-04-11 08:37:50	NO3-N	12.154		GB10 Ruden s.	2011-04-11 15:33:59	NO3-N	21.26		RB15 Buschvitz oe.	2010-10-25 09:00:00	NO3-N	2.422		RB10 Lietzow n.	2011-08-02 09:50:05	NO3-N	0.22
WB3 Walfisch n.	2010-11-17 10:13:14	O-PO4-P	0.67		SH2 Tessmannsdorf nw.	2010-10-19 07:35:00	O-PO4-P	0.087		UW4 Warnowwerft	2011-03-09 08:31:25	O-PO4-P	0.502		DB2 Sundische Wiese	40462.4	O-PO4-P	0.11		KB90 Fahrwasser I.Libitz w.	40651.4	O-PO4-P	0.05		S66 Stralsund	2011-04-11 08:37:50	O-PO4-P	0.058		GB10 Ruden s.	2011-04-11 15:33:59	O-PO4-P	0.063		RB15 Buschvitz oe.	2010-10-25 09:00:00	O-PO4-P	0.208		RB10 Lietzow n.	2011-08-02 09:50:05	O-PO4-P	0.094
WB3 Walfisch n.	2011-03-10 08:05:00	NH4-N	0.6		SH2 Tessmannsdorf nw.	2010-11-17 08:38:00	NH4-N	5.632		UW4 Warnowwerft	2011-04-06 12:47:58	NH4-N	0.6		DB2 Sundische Wiese	40498.5	NH4-N	4.696		KB90 Fahrwasser I.Libitz w.	40679.4	NH4-N	0.6		S66 Stralsund	2011-05-02 08:42:56	NH4-N	0.6		GB10 Ruden s.	2011-05-03 08:10:11	NH4-N	0.6		RB15 Buschvitz oe.	2010-11-22 09:30:00	NH4-N	16.398		RB10 Lietzow n.	2011-09-06 09:35:13	NH4-N	0.6
WB3 Walfisch n.	2011-03-10 08:05:00	NO2-N	0.359		SH2 Tessmannsdorf nw.	2010-11-17 08:38:00	NO2-N	1.979		UW4 Warnowwerft	2011-04-06 12:47:58	NO2-N	0.425		DB2 Sundische Wiese	40498.5	NO2-N	0.722		KB90 Fahrwasser I.Libitz w.	40679.4	NO2-N	0.02		S66 Stralsund	2011-05-02 08:42:56	NO2-N	0.155		GB10 Ruden s.	2011-05-03 08:10:11	NO2-N	0.727		RB15 Buschvitz oe.	2010-11-22 09:30:00	NO2-N	0.924		RB10 Lietzow n.	2011-09-06 09:35:13	NO2-N	0.034
WB3 Walfisch n.	2011-03-10 08:05:00	NO3-N	0.969		SH2 Tessmannsdorf nw.	2010-11-17 08:38:00	NO3-N	143.04		UW4 Warnowwerft	2011-04-06 12:47:58	NO3-N	29.996		DB2 Sundische Wiese	40498.5	NO3-N	49.65		KB90 Fahrwasser I.Libitz w.	40679.4	NO3-N	0.22		S66 Stralsund	2011-05-02 08:42:56	NO3-N	2.2835		GB10 Ruden s.	2011-05-03 08:10:11	NO3-N	22.175		RB15 Buschvitz oe.	2010-11-22 09:30:00	NO3-N	53.86		RB10 Lietzow n.	2011-09-06 09:35:13	NO3-N	0.22
WB3 Walfisch n.	2011-03-10 08:05:00	O-PO4-P	0.152		SH2 Tessmannsdorf nw.	2010-11-17 08:38:00	O-PO4-P	0.365		UW4 Warnowwerft	2011-04-06 12:47:58	O-PO4-P	0.406		DB2 Sundische Wiese	40498.5	O-PO4-P	0.079		KB90 Fahrwasser I.Libitz w.	40679.4	O-PO4-P	0.05		S66 Stralsund	2011-05-02 08:42:56	O-PO4-P	0.05		GB10 Ruden s.	2011-05-03 08:10:11	O-PO4-P	0.05		RB15 Buschvitz oe.	2010-11-22 09:30:00	O-PO4-P	0.151		RB10 Lietzow n.	2011-09-06 09:35:13	O-PO4-P	0.317
WB3 Walfisch n.	2011-04-06 08:24:49	NH4-N	0.737		SH2 Tessmannsdorf nw.	2011-03-24 09:31:00	NH4-N	0.6		UW4 Warnowwerft	2011-05-24 09:07:36	NH4-N	0.6		DB2 Sundische Wiese	40630.3	NH4-N	7.287		KB90 Fahrwasser I.Libitz w.	40729.4	NH4-N	0.6		S66 Stralsund	2011-07-18 08:39:04	NH4-N	0.6		GB10 Ruden s.	2011-07-19 08:05:11	NH4-N	0.6		RB15 Buschvitz oe.	2011-03-21 09:00:00	NH4-N	37.38		RB10 Lietzow n.	2011-10-04 09:36:51	NH4-N	1.646
WB3 Walfisch n.	2011-04-06 08:24:49	NO2-N	0.163		SH2 Tessmannsdorf nw.	2011-03-24 09:31:00	NO2-N	0.735		UW4 Warnowwerft	2011-05-24 09:07:36	NO2-N	0.02		DB2 Sundische Wiese	40630.3	NO2-N	1.031		KB90 Fahrwasser I.Libitz w.	40729.4	NO2-N	0.0375		S66 Stralsund	2011-07-18 08:39:04	NO2-N	0.02		GB10 Ruden s.	2011-07-19 08:05:11	NO2-N	0.02		RB15 Buschvitz oe.	2011-03-21 09:00:00	NO2-N	0.908		RB10 Lietzow n.	2011-10-04 09:36:51	NO2-N	0.1985
WB3 Walfisch n.	2011-04-06 08:24:49	NO3-N	2.242		SH2 Tessmannsdorf nw.	2011-03-24 09:31:00	NO3-N	51.49		UW4 Warnowwerft	2011-05-24 09:07:36	NO3-N	1.123		DB2 Sundische Wiese	40630.3	NO3-N	64.86		KB90 Fahrwasser I.Libitz w.	40729.4	NO3-N	0.22		S66 Stralsund	2011-07-18 08:39:04	NO3-N	0.22		GB10 Ruden s.	2011-07-19 08:05:11	NO3-N	0.22		RB15 Buschvitz oe.	2011-03-21 09:00:00	NO3-N	41.27		RB10 Lietzow n.	2011-10-04 09:36:51	NO3-N	0.559
WB3 Walfisch n.	2011-04-06 08:24:49	O-PO4-P	0.194		SH2 Tessmannsdorf nw.	2011-03-24 09:31:00	O-PO4-P	0.06		UW4 Warnowwerft	2011-05-24 09:07:36	O-PO4-P	0.05		DB2 Sundische Wiese	40630.3	O-PO4-P	0.127		KB90 Fahrwasser I.Libitz w.	40729.4	O-PO4-P	0.0615		S66 Stralsund	2011-07-18 08:39:04	O-PO4-P	0.7225		GB10 Ruden s.	2011-07-19 08:05:11	O-PO4-P	0.2245		RB15 Buschvitz oe.	2011-03-21 09:00:00	O-PO4-P	0.217		RB10 Lietzow n.	2011-10-04 09:36:51	O-PO4-P	0.417
WB3 Walfisch n.	2011-05-25 08:14:56	NH4-N	0.6		SH2 Tessmannsdorf nw.	2011-04-06 09:22:00	NH4-N	0.442		UW4 Warnowwerft	2011-06-28 09:29:23	NH4-N	0.6		DB2 Sundische Wiese	40659.5	NH4-N	0.6		KB90 Fahrwasser I.Libitz w.	40756.4	NH4-N	0.6		S66 Stralsund	2011-08-15 08:38:12	NH4-N	0.6		GB10 Ruden s.	2011-08-16 08:03:33	NH4-N	0.6		RB15 Buschvitz oe.	2011-04-18 09:20:00	NH4-N	0.6		RB10 Lietzow n.	2011-11-15 09:35:40	NH4-N	0.6
WB3 Walfisch n.	2011-05-25 08:14:56	NO2-N	0.02		SH2 Tessmannsdorf nw.	2011-04-06 09:22:00	NO2-N	0.586		UW4 Warnowwerft	2011-06-28 09:29:23	NO2-N	0.068		DB2 Sundische Wiese	40659.5	NO2-N	0.02		KB90 Fahrwasser I.Libitz w.	40756.4	NO2-N	0.02		S66 Stralsund	2011-08-15 08:38:12	NO2-N	0.02		GB10 Ruden s.	2011-08-16 08:03:33	NO2-N	0.0375		RB15 Buschvitz oe.	2011-04-18 09:20:00	NO2-N	1.135		RB10 Lietzow n.	2011-11-15 09:35:40	NO2-N	0.09
WB3 Walfisch n.	2011-05-25 08:14:56	NO3-N	0.22		SH2 Tessmannsdorf nw.	2011-04-06 09:22:00	NO3-N	34.924		UW4 Warnowwerft	2011-06-28 09:29:23	NO3-N	0.22		DB2 Sundische Wiese	40659.5	NO3-N	0.22		KB90 Fahrwasser I.Libitz w.	40756.4	NO3-N	0.22		S66 Stralsund	2011-08-15 08:38:12	NO3-N	0.22		GB10 Ruden s.	2011-08-16 08:03:33	NO3-N	0.22		RB15 Buschvitz oe.	2011-04-18 09:20:00	NO3-N	31.622		RB10 Lietzow n.	2011-11-15 09:35:40	NO3-N	0.3915
WB3 Walfisch n.	2011-05-25 08:14:56	O-PO4-P	0.1555		SH2 Tessmannsdorf nw.	2011-04-06 09:22:00	O-PO4-P	0.087		UW4 Warnowwerft	2011-06-28 09:29:23	O-PO4-P	0.16		DB2 Sundische Wiese	40659.5	O-PO4-P	0.05		KB90 Fahrwasser I.Libitz w.	40756.4	O-PO4-P	0.145		S66 Stralsund	2011-08-15 08:38:12	O-PO4-P	0.05		GB10 Ruden s.	2011-08-16 08:03:33	O-PO4-P	0.1		RB15 Buschvitz oe.	2011-04-18 09:20:00	O-PO4-P	0.064		RB10 Lietzow n.	2011-11-15 09:35:40	O-PO4-P	0.05
WB3 Walfisch n.	2011-06-29 08:15:43	NH4-N	0.6		SH2 Tessmannsdorf nw.	2011-05-25 08:23:00	NH4-N	0.6		UW4 Warnowwerft	2011-07-12 09:41:26	NH4-N	3.1395		DB2 Sundische Wiese	40673.5	NH4-N	0.6		KB90 Fahrwasser I.Libitz w.	40791.3	NH4-N	0.6		S66 Stralsund	2011-09-12 12:44:16	NH4-N	0.6		GB10 Ruden s.	2011-09-13 08:02:01	NH4-N	0.6		RB15 Buschvitz oe.	2011-05-23 09:15:00	NH4-N	0.6		RB10 Lietzow n.	2012-04-11 09:54:00	NH4-N	0.74
WB3 Walfisch n.	2011-06-29 08:15:43	NO2-N	0.0165		SH2 Tessmannsdorf nw.	2011-05-25 08:23:00	NO2-N	0.02		UW4 Warnowwerft	2011-07-12 09:41:26	NO2-N	0.363		DB2 Sundische Wiese	40673.5	NO2-N	0.0265		KB90 Fahrwasser I.Libitz w.	40791.3	NO2-N	0.0615		S66 Stralsund	2011-09-12 12:44:16	NO2-N	0.04505		GB10 Ruden s.	2011-09-13 08:02:01	NO2-N	0.05		RB15 Buschvitz oe.	2011-05-23 09:15:00	NO2-N	0.02		RB10 Lietzow n.	2012-04-11 09:54:00	NO2-N	0.02
WB3 Walfisch n.	2011-06-29 08:15:43	NO3-N	0.388		SH2 Tessmannsdorf nw.	2011-05-25 08:23:00	NO3-N	0.22		UW4 Warnowwerft	2011-07-12 09:41:26	NO3-N	0.994		DB2 Sundische Wiese	40673.5	NO3-N	0.2515		KB90 Fahrwasser I.Libitz w.	40791.3	NO3-N	0.22		S66 Stralsund	2011-09-12 12:44:16	NO3-N	0.22		GB10 Ruden s.	2011-09-13 08:02:01	NO3-N	0.22		RB15 Buschvitz oe.	2011-05-23 09:15:00	NO3-N	0.3445		RB10 Lietzow n.	2012-04-11 09:54:00	NO3-N	0.2
WB3 Walfisch n.	2011-06-29 08:15:43	O-PO4-P	0.228		SH2 Tessmannsdorf nw.	2011-05-25 08:23:00	O-PO4-P	0.05		UW4 Warnowwerft	2011-07-12 09:41:26	O-PO4-P	0.155		DB2 Sundische Wiese	40673.5	O-PO4-P	0.05		KB90 Fahrwasser I.Libitz w.	40791.3	O-PO4-P	0.05		S66 Stralsund	2011-09-12 12:44:16	O-PO4-P	0.19		GB10 Ruden s.	2011-09-13 08:02:01	O-PO4-P	0.184		RB15 Buschvitz oe.	2011-05-23 09:15:00	O-PO4-P	0.069		RB10 Lietzow n.	2012-04-11 09:54:00	O-PO4-P	0.06
WB3 Walfisch n.	2011-07-13 08:14:25	NH4-N	0.6		SH2 Tessmannsdorf nw.	2011-06-29 06:33:00	NH4-N	0.6		UW4 Warnowwerft	2011-08-23 09:59:46	NH4-N	8.0585		DB2 Sundische Wiese	40708.5	NH4-N	0.6		KB90 Fahrwasser I.Libitz w.	40820.4	NH4-N	0.6		S66 Stralsund	2011-10-24 08:45:23	NH4-N	0.6		GB10 Ruden s.	2011-10-24 15:46:11	NH4-N	6.885		RB15 Buschvitz oe.	2011-06-15 09:30:00	NH4-N	11.124		RB10 Lietzow n.	2012-05-31 10:04:00	NH4-N	1.19
[truncated: 863 more rows]

## Sheet: Clearance rate Laboratory 
Laboratory experiments
[truncated: 82 more rows]

## Sheet: Clearance rate Mesocosm
	Wieker Bay									Greifswalder Bodden
Run	time [h]	Chl.a concentration [µg/l]	LN Chl.a concentration [µg/l]		Run	DW total mass [g]			Run	time [h]	Chl.a concentration [µg/l]	LN Chl.a concentration [µg/l]		Run	DW total mass [g]
1					1	7.3428			1					1	294.72
[truncated: 153 more rows]

## Sheet: Nutrien content blue mussel 
Greifswalder Bodden	Wieker Bodden
[truncated: 18 more rows]

[truncated: 4 more sheets: Sediment TOC, Bio deposition, Vibrio monitoring, Economic assessment]
